# Supplementary material
Source: Frontiers journal article supplement (https://www.frontiersin.org/articles/562671)
Supplement: Data_Sheet_1.zip [file Data_Sheet_1.zip]

## Sheet: Table S7
Table S7: Predicted epitopes in SARS-Cov2 proteins using the South American alleles with WAF ≥ 0.05.
The experimental evidence, if available, is represented as the IEDB ID and experiment type. The number of alleles covered by country (abbreviated using the first three letters of their names) and coverage score are provided.
								linearT_MHC			MHC_ligand				Alleles with WAF ≥ 0.05 covered by country
ID	Type	Protein	Start	End	Peptide	Length	Exp_Evidence	Epitope	IEDB_ID	Evidence_Type	Epitope	IEDB_ID	Evidence_Type	Alleles	ARG	BOL	BRA	CHI	COL	ECU	PAR	PER	VEN	SCORE
EpI_E_1	HLA-I	E	4	12	FVSEETGTL	9	No	NA	NA	NA	NA	NA	NA	HLA-A*02:04, HLA-A*02:22, HLA-A*68:02, HLA-B*15:04, HLA-B*35:05, HLA-B*35:11, HLA-B*35:12, HLA-B*35:43, HLA-B*39:05, HLA-B*39:09, HLA-B*51:04, HLA-C*01:02, HLA-C*03:03, HLA-C*03:04, HLA-C*04:01, HLA-C*05:01, HLA-C*07:01, HLA-C*07:02, HLA-C*15:02, HLA-C*15:03, HLA-C*16:01	4	0	8	5	8	0	4	3	12	2.77264
EpI_E_2	HLA-I	E	4	13	FVSEETGTLI	10	No	NA	NA	NA	NA	NA	NA	HLA-A*02:22, HLA-A*68:02, HLA-C*05:01, HLA-C*15:03	1	0	1	1	1	0	0	0	3	0.363679
EpI_E_3	HLA-I	E	5	14	VSEETGTLIV	10	Yes	NA	NA	NA	SEETGTLIV	57395	HLA-B*40:01,HLA-B*45:01	HLA-B*40:04	0	0	0	0	0	0	1	0	1	0.172619
EpI_E_4	HLA-I	E	5	13	VSEETGTLI	9	No	NA	NA	NA	NA	NA	NA	HLA-B*52:01, HLA-C*01:02, HLA-C*03:04, HLA-C*04:01, HLA-C*05:01, HLA-C*15:02, HLA-C*15:03	2	0	4	2	4	0	0	2	5	1.11485
EpI_E_5	HLA-I	E	6	14	SEETGTLIV	9	Yes	NA	NA	NA	SEETGTLIV	57395	HLA-B*40:01,HLA-B*45:01	HLA-B*39:05, HLA-B*40:02, HLA-B*40:03, HLA-B*40:04, HLA-B*52:01	0	0	0	0	1	1	2	0	4	0.6993
EpI_E_6	HLA-I	E	6	13	SEETGTLI	8	Yes	NA	NA	NA	SEETGTLIV	57395	HLA-B*40:01,HLA-B*45:01	HLA-B*40:02, HLA-B*40:04, HLA-B*52:01	0	0	0	0	1	1	1	0	3	0.526681
EpI_E_7	HLA-I	E	8	17	ETGTLIVNSV	10	No	NA	NA	NA	NA	NA	NA	HLA-A*68:02	0	0	0	0	0	0	0	0	1	0.047619
EpI_E_8	HLA-I	E	9	17	TGTLIVNSV	9	No	NA	NA	NA	NA	NA	NA	HLA-B*52:01	0	0	0	0	0	0	0	0	1	0.047619
EpI_E_9	HLA-I	E	10	18	GTLIVNSVL	9	No	NA	NA	NA	NA	NA	NA	HLA-C*03:04, HLA-C*15:03, HLA-C*16:01	0	0	2	0	2	0	0	1	2	0.419234
EpI_E_10	HLA-I	E	11	19	TLIVNSVLL	9	No	NA	NA	NA	NA	NA	NA	HLA-A*02:04, HLA-A*02:22, HLA-B*39:09, HLA-C*01:02, HLA-C*03:04, HLA-C*15:03, HLA-C*16:01	0	0	2	1	3	0	0	1	6	0.727358
EpI_E_11	HLA-I	E	11	20	TLIVNSVLLF	10	No	NA	NA	NA	NA	NA	NA	HLA-A*23:01	0	0	1	0	0	0	0	0	0	0.047619
EpI_E_12	HLA-I	E	12	20	LIVNSVLLF	9	Yes	NA	NA	NA	LIVNSVLLFL	36752	HLA-A*02:01,HLA-A*02:02,HLA-A*02:03,HLA-A*02:06,HLA-A*68:02	HLA-A*23:01, HLA-A*29:02, HLA-B*15:01, HLA-B*15:04, HLA-B*35:05, HLA-B*35:11, HLA-B*35:43, HLA-C*03:04, HLA-C*16:01	0	0	3	1	3	0	3	1	3	1.00712
EpI_E_13	HLA-I	E	13	21	IVNSVLLFL	9	Yes	NA	NA	NA	IVNSVLLFL, LIVNSVLLFL	29377, 36752	HLA-A*02:01,HLA-A*02:02,HLA-A*02:03,HLA-A*02:06,HLA-A*68:02	HLA-A*02:04, HLA-A*02:11, HLA-A*02:22, HLA-C*01:02, HLA-C*03:04, HLA-C*15:03, HLA-C*16:01	0	0	2	0	3	0	1	2	5	0.857026
EpI_E_14	HLA-I	E	15	23	NSVLLFLAF	9	No	NA	NA	NA	NA	NA	NA	HLA-B*35:05, HLA-B*35:11	0	0	0	0	0	0	2	0	0	0.25
EpI_E_15	HLA-I	E	16	24	SVLLFLAFV	9	Yes	NA	NA	NA	SVLLFLAFV, SVLLFLAFVV	62214, 62215	HLA-A*02:01,HLA-A*02:02,HLA-A*02:03,HLA-A*02:06,HLA-A*68:02	HLA-A*02:01, HLA-A*02:04, HLA-A*02:11, HLA-A*02:17, HLA-A*02:22, HLA-A*68:02	1	0	1	1	1	1	1	2	5	1.00614
EpI_E_16	HLA-I	E	17	25	VLLFLAFVV	9	Yes	NA	NA	NA	SVLLFLAFVV, VLLFLAFVV	62215, 69591	HLA-A*02:01,HLA-A*02:02,HLA-A*02:03,HLA-A*02:06,HLA-A*68:02	HLA-A*02:01, HLA-A*02:04, HLA-A*02:11, HLA-A*02:17	1	0	1	1	1	1	1	2	3	0.910901
EpI_E_17	HLA-I	E	18	26	LLFLAFVVF	9	Yes	NA	NA	NA	LLFLAFVVFL	37270	HLA-A*02:01,HLA-A*02:02,HLA-A*02:03,HLA-A*02:06,HLA-A*68:02	HLA-B*15:01	0	0	0	0	0	0	0	0	1	0.047619
EpI_E_18	HLA-I	E	19	26	LFLAFVVF	8	Yes	NA	NA	NA	LFLAFVVFL, LFLAFVVFLL, LLFLAFVVFL	35885, 35886, 37270	HLA-A*01:01,HLA-A*23:01,HLA-A*26:01,HLA-A*29:02,HLA-A*30:02,HLA-A*02:01,HLA-A*02:02,HLA-A*02:03,HLA-A*02:06,HLA-A*68:02	HLA-A*23:01	0	0	1	0	0	0	0	0	0	0.047619
EpI_E_19	HLA-I	E	20	27	FLAFVVFL	8	Yes	NA	NA	NA	FLAFVVFLL, FLAFVVFLLV, LFLAFVVFL, LFLAFVVFLL, LLFLAFVVFL	16501, 16502, 35885, 35886, 37270	HLA-A*01:01,HLA-A*23:01,HLA-A*26:01,HLA-A*29:02,HLA-A*30:02,HLA-A*02:01,HLA-A*02:02,HLA-A*02:03,HLA-A*02:06,HLA-A*68:02	HLA-A*02:01, HLA-A*02:04, HLA-A*02:11, HLA-A*02:17, HLA-A*02:22	1	0	1	1	1	1	1	2	4	0.95852
EpI_E_20	HLA-I	E	20	28	FLAFVVFLL	9	Yes	NA	NA	NA	FLAFVVFLL, FLAFVVFLLV, LFLAFVVFLL	16501, 16502, 35886	HLA-A*02:01,HLA-A*02:02,HLA-A*02:03,HLA-A*02:06,HLA-A*68:02,HLA-A*01:01,HLA-A*23:01,HLA-A*26:01,HLA-A*29:02,HLA-A*30:02	HLA-A*02:01, HLA-A*02:04, HLA-A*02:11, HLA-A*02:17, HLA-A*02:22, HLA-A*68:02, HLA-C*01:02	1	0	1	1	2	1	1	2	6	1.11258
EpI_E_21	HLA-I	E	21	28	LAFVVFLL	8	Yes	NA	NA	NA	FLAFVVFLL, FLAFVVFLLV, LAFVVFLLV, LFLAFVVFLL	16501, 16502, 34767, 35886	HLA-A*02:01,HLA-A*02:02,HLA-A*02:03,HLA-A*02:06,HLA-A*68:02,HLA-A*01:01,HLA-A*23:01,HLA-A*26:01,HLA-A*29:02,HLA-A*30:02	HLA-B*52:01	0	0	0	0	0	0	0	0	1	0.047619
EpI_E_22	HLA-I	E	21	29	LAFVVFLLV	9	Yes	NA	NA	NA	FLAFVVFLLV, LAFVVFLLV	16502, 34767	HLA-A*02:01,HLA-A*02:02,HLA-A*02:03,HLA-A*02:06,HLA-A*68:02	HLA-B*52:01	0	0	0	0	0	0	0	0	1	0.047619
EpI_E_23	HLA-I	E	23	31	FVVFLLVTL	9	Yes	NA	NA	NA	FVVFLLVTL	18316	HLA-A*02:01,HLA-A*02:02,HLA-A*02:03,HLA-A*02:06,HLA-A*68:02	HLA-A*02:04, HLA-A*68:02, HLA-C*03:04	0	0	1	0	1	0	0	1	3	0.360411
EpI_E_24	HLA-I	E	24	31	VVFLLVTL	8	Yes	NA	NA	NA	FVVFLLVTL	18316	HLA-A*02:01,HLA-A*02:02,HLA-A*02:03,HLA-A*02:06,HLA-A*68:02	HLA-B*52:01	0	0	0	0	0	0	0	0	1	0.047619
EpI_E_25	HLA-I	E	25	33	VFLLVTLAI	9	No	NA	NA	NA	NA	NA	NA	HLA-A*23:01, HLA-A*24:02	1	0	2	1	1	1	0	1	1	0.627171
EpI_E_26	HLA-I	E	26	34	FLLVTLAIL	9	Yes	NA	NA	NA	FLLVTLAIL	16762	HLA-A*02:01,HLA-A*02:02,HLA-A*02:03,HLA-A*02:06,HLA-A*68:02	HLA-A*02:01, HLA-A*02:04, HLA-A*02:11, HLA-A*02:17, HLA-A*02:22	1	0	1	1	1	1	1	2	4	0.95852
EpI_E_27	HLA-I	E	29	37	VTLAILTAL	9	Yes	NA	NA	NA	VTLAILTALR	71397	HLA-A*03:01,HLA-A*11:01,HLA-A*31:01,HLA-A*33:01,HLA-A*68:01	HLA-A*02:04, HLA-A*02:11, HLA-A*68:02, HLA-B*15:04, HLA-B*35:12, HLA-B*52:01, HLA-C*01:02, HLA-C*03:04, HLA-C*15:03, HLA-C*16:01	0	0	2	0	3	0	2	2	7	1.07726
EpI_E_28	HLA-I	E	29	38	VTLAILTALR	10	Yes	NA	NA	NA	TLAILTALR, VTLAILTALR	64718, 71397	HLA-A*03:01,HLA-A*11:01,HLA-A*31:01,HLA-A*33:01,HLA-A*68:01	HLA-A*11:01, HLA-A*31:01, HLA-A*68:01	2	0	1	2	1	1	1	1	1	0.818931
EpI_E_29	HLA-I	E	30	37	TLAILTAL	8	Yes	NA	NA	NA	TLAILTALR, VTLAILTALR	64718, 71397	HLA-A*03:01,HLA-A*11:01,HLA-A*31:01,HLA-A*33:01,HLA-A*68:01	HLA-A*02:22	0	0	0	0	0	0	0	0	1	0.047619
EpI_E_30	HLA-I	E	30	38	TLAILTALR	9	Yes	NA	NA	NA	TLAILTALR, VTLAILTALR	64718, 71397	HLA-A*03:01,HLA-A*11:01,HLA-A*31:01,HLA-A*33:01,HLA-A*68:01	HLA-A*31:01, HLA-A*68:01	1	0	0	2	1	1	1	1	1	0.715756
EpI_E_31	HLA-I	E	31	39	LAILTALRL	9	No	NA	NA	NA	NA	NA	NA	HLA-B*35:05, HLA-B*35:11, HLA-B*35:12, HLA-B*51:04, HLA-B*52:01, HLA-C*01:02, HLA-C*03:04, HLA-C*15:03, HLA-C*16:01	0	0	2	0	3	0	3	1	5	0.995915
EpI_E_32	HLA-I	E	33	42	ILTALRLCAY	10	Yes	NA	NA	NA	LTALRLCAY	39803	HLA-A*01:01,HLA-A*26:01,HLA-A*29:02,HLA-A*30:02	HLA-A*29:02	0	0	0	1	0	0	0	0	0	0.0588235
EpI_E_33	HLA-I	E	34	42	LTALRLCAY	9	Yes	NA	NA	NA	LTALRLCAY	39803	HLA-A*01:01,HLA-A*26:01,HLA-A*29:02,HLA-A*30:02	HLA-A*01:01, HLA-A*29:02, HLA-B*15:01, HLA-B*35:43	1	0	1	2	2	0	0	0	2	0.433707
EpI_E_34	HLA-I	E	45	53	NIVNVSLVK	9	No	NA	NA	NA	NA	NA	NA	HLA-A*03:01, HLA-A*11:01, HLA-A*68:01	2	0	2	2	2	2	0	0	0	0.841643
EpI_E_35	HLA-I	E	46	53	IVNVSLVK	8	No	NA	NA	NA	NA	NA	NA	HLA-A*03:01, HLA-A*11:01	2	0	2	1	1	1	0	0	0	0.523996
EpI_E_36	HLA-I	E	48	57	NVSLVKPSFY	10	No	NA	NA	NA	NA	NA	NA	HLA-A*29:02	0	0	0	1	0	0	0	0	0	0.0588235
EpI_E_37	HLA-I	E	48	58	NVSLVKPSFYV	11	No	NA	NA	NA	NA	NA	NA	HLA-A*68:02	0	0	0	0	0	0	0	0	1	0.047619
EpI_E_38	HLA-I	E	48	56	NVSLVKPSF	9	No	NA	NA	NA	NA	NA	NA	HLA-B*35:05, HLA-B*35:11, HLA-B*35:12, HLA-B*35:43, HLA-B*51:04, HLA-C*16:01	0	0	1	0	2	0	3	0	2	0.635504
EpI_E_39	HLA-I	E	49	58	VSLVKPSFYV	10	No	NA	NA	NA	NA	NA	NA	HLA-A*02:04, HLA-A*02:11, HLA-A*02:22	0	0	0	0	0	0	1	1	2	0.331349
EpI_E_40	HLA-I	E	49	57	VSLVKPSFY	9	No	NA	NA	NA	NA	NA	NA	HLA-A*29:02, HLA-B*15:04, HLA-B*35:43, HLA-C*07:01, HLA-C*16:01	1	0	2	2	3	0	1	0	1	0.61753
EpI_E_41	HLA-I	E	50	58	SLVKPSFYV	9	No	NA	NA	NA	NA	NA	NA	HLA-A*02:01, HLA-A*02:04, HLA-A*02:11, HLA-A*02:17, HLA-A*02:22, HLA-A*68:02, HLA-C*01:02, HLA-C*15:03	1	0	1	1	2	1	1	2	7	1.1602
EpI_E_42	HLA-I	E	50	59	SLVKPSFYVY	10	No	NA	NA	NA	NA	NA	NA	HLA-A*11:01, HLA-A*29:02, HLA-B*15:01, HLA-B*15:04, HLA-B*35:11, HLA-B*35:43	1	0	1	1	1	0	2	0	2	0.56606
EpI_E_43	HLA-I	E	50	57	SLVKPSFY	8	No	NA	NA	NA	NA	NA	NA	HLA-A*29:02, HLA-B*15:01, HLA-B*15:04	0	0	0	1	0	0	1	0	1	0.231443
EpI_E_44	HLA-I	E	51	59	LVKPSFYVY	9	No	NA	NA	NA	NA	NA	NA	HLA-A*29:02, HLA-B*15:01, HLA-B*15:04, HLA-B*35:01, HLA-B*35:05, HLA-B*35:11, HLA-B*35:43, HLA-C*07:01, HLA-C*16:01	2	0	3	3	3	0	3	1	2	1.18826
EpI_E_45	HLA-I	E	51	61	LVKPSFYVYSR	11	No	NA	NA	NA	NA	NA	NA	HLA-A*31:01	1	0	0	1	0	0	1	1	1	0.398109
EpI_E_46	HLA-I	E	53	61	KPSFYVYSR	9	No	NA	NA	NA	NA	NA	NA	HLA-A*31:01	1	0	0	1	0	0	1	1	1	0.398109
EpI_E_47	HLA-I	E	55	63	SFYVYSRVK	9	No	NA	NA	NA	NA	NA	NA	HLA-A*03:01, HLA-A*31:01	2	0	1	2	1	1	1	1	1	0.818931
EpI_E_48	HLA-I	E	56	65	FYVYSRVKNL	10	No	NA	NA	NA	NA	NA	NA	HLA-A*23:01	0	0	1	0	0	0	0	0	0	0.047619
EpI_E_49	HLA-I	E	57	65	YVYSRVKNL	9	No	NA	NA	NA	NA	NA	NA	HLA-A*02:04, HLA-A*02:11, HLA-A*02:22, HLA-B*08:01, HLA-B*15:04, HLA-B*35:05, HLA-B*35:11, HLA-B*35:12, HLA-B*35:43, HLA-B*39:09, HLA-B*51:04, HLA-B*52:01, HLA-C*01:02, HLA-C*03:04, HLA-C*06:02, HLA-C*07:01, HLA-C*07:02, HLA-C*15:03, HLA-C*16:01	4	0	6	4	7	0	5	3	10	2.58952
EpI_E_50	HLA-I	E	59	69	YSRVKNLNSSR	11	No	NA	NA	NA	NA	NA	NA	HLA-A*31:01	1	0	0	1	0	0	1	1	1	0.398109
EpI_E_51	HLA-I	E	61	69	RVKNLNSSR	9	No	NA	NA	NA	NA	NA	NA	HLA-A*03:01, HLA-A*31:01, HLA-A*68:01	2	0	1	3	2	2	1	1	1	1.13658
EpI_E_52	HLA-I	E	66	74	NSSRVPDLL	9	No	NA	NA	NA	NA	NA	NA	HLA-A*68:02	0	0	0	0	0	0	0	0	1	0.047619
EpI_E_53	HLA-I	E	67	75	SSRVPDLLV	9	No	NA	NA	NA	NA	NA	NA	HLA-C*15:03	0	0	0	0	0	0	0	0	1	0.047619
EpI_M_1	HLA-I	M	1	8	MADSNGTI	8	No	NA	NA	NA	NA	NA	NA	HLA-B*35:12, HLA-B*51:04, HLA-C*01:02, HLA-C*05:01, HLA-C*08:02	1	0	2	1	2	0	1	0	2	0.547502
EpI_M_2	HLA-I	M	1	10	MADSNGTITV	10	No	NA	NA	NA	NA	NA	NA	HLA-B*35:12, HLA-B*51:04, HLA-C*01:02, HLA-C*03:04, HLA-C*15:03	0	0	1	0	2	0	1	1	4	0.591853
EpI_M_3	HLA-I	M	1	9	MADSNGTIT	9	No	NA	NA	NA	NA	NA	NA	HLA-C*05:01, HLA-C*08:02	1	0	2	1	1	0	0	0	0	0.268441
EpI_M_4	HLA-I	M	2	10	ADSNGTITV	9	No	NA	NA	NA	NA	NA	NA	HLA-B*40:04, HLA-B*52:01	0	0	0	0	0	0	1	0	2	0.220238
EpI_M_5	HLA-I	M	5	14	NGTITVEELK	10	No	NA	NA	NA	NA	NA	NA	HLA-A*68:01	0	0	0	1	1	1	0	0	0	0.317647
EpI_M_6	HLA-I	M	6	15	GTITVEELKK	10	No	NA	NA	NA	NA	NA	NA	HLA-A*03:01, HLA-A*11:01, HLA-A*68:01	2	0	2	2	2	2	0	0	0	0.841643
EpI_M_7	HLA-I	M	6	14	GTITVEELK	9	No	NA	NA	NA	NA	NA	NA	HLA-A*11:01, HLA-A*68:01	1	0	1	1	1	1	0	0	0	0.420822
EpI_M_8	HLA-I	M	7	15	TITVEELKK	9	No	NA	NA	NA	NA	NA	NA	HLA-A*11:01, HLA-A*68:01	1	0	1	1	1	1	0	0	0	0.420822
EpI_M_9	HLA-I	M	8	16	ITVEELKKL	9	No	NA	NA	NA	NA	NA	NA	HLA-C*01:02, HLA-C*03:04, HLA-C*15:03, HLA-C*16:01	0	0	2	0	3	0	0	1	3	0.525677
EpI_M_10	HLA-I	M	9	17	TVEELKKLL	9	No	NA	NA	NA	NA	NA	NA	HLA-C*15:03	0	0	0	0	0	0	0	0	1	0.047619
EpI_M_11	HLA-I	M	11	20	EELKKLLEQW	10	No	NA	NA	NA	NA	NA	NA	HLA-B*44:03	1	0	1	0	1	0	0	0	0	0.161998
EpI_M_12	HLA-I	M	14	23	KKLLEQWNLV	10	No	NA	NA	NA	NA	NA	NA	HLA-A*02:04	0	0	0	0	0	0	0	0	1	0.047619
EpI_M_13	HLA-I	M	15	22	KLLEQWNL	8	No	NA	NA	NA	NA	NA	NA	HLA-A*02:01, HLA-A*02:04, HLA-A*02:11, HLA-A*02:22	1	0	1	1	1	1	1	2	3	0.910901
EpI_M_14	HLA-I	M	15	23	KLLEQWNLV	9	No	NA	NA	NA	NA	NA	NA	HLA-A*02:01, HLA-A*02:04, HLA-A*02:11, HLA-A*02:17, HLA-A*02:22, HLA-B*52:01, HLA-C*15:03	1	0	1	1	1	1	1	2	6	1.05376
EpI_M_15	HLA-I	M	15	24	KLLEQWNLVI	10	No	NA	NA	NA	NA	NA	NA	HLA-A*02:01, HLA-A*02:04, HLA-A*02:11, HLA-A*02:17	1	0	1	1	1	1	1	2	3	0.910901
EpI_M_16	HLA-I	M	16	24	LLEQWNLVI	9	No	NA	NA	NA	NA	NA	NA	HLA-A*02:01, HLA-C*04:01, HLA-C*15:03	2	0	2	2	2	1	0	2	3	1.00672
EpI_M_17	HLA-I	M	17	26	LEQWNLVIGF	10	Yes	NA	NA	NA	LEQWNLVIGF	35671	HLA-B*18:01,HLA-B*40:01,HLA-B*44:02,HLA-B*44:03,HLA-B*45:01	HLA-B*18:01, HLA-B*40:03, HLA-B*40:04, HLA-B*44:03	2	0	1	1	1	0	2	0	1	0.573996
EpI_M_18	HLA-I	M	17	24	LEQWNLVI	8	Yes	NA	NA	NA	LEQWNLVIGF	35671	HLA-B*18:01,HLA-B*40:01,HLA-B*44:02,HLA-B*44:03,HLA-B*45:01	HLA-B*52:01	0	0	0	0	0	0	0	0	1	0.047619
EpI_M_19	HLA-I	M	18	26	EQWNLVIGF	9	Yes	NA	NA	NA	LEQWNLVIGF	35671	HLA-B*18:01,HLA-B*40:01,HLA-B*44:02,HLA-B*44:03,HLA-B*45:01	HLA-B*15:01, HLA-B*15:04, HLA-B*18:01, HLA-B*39:05, HLA-B*39:09, HLA-B*40:03, HLA-B*40:04, HLA-B*44:03, HLA-B*52:01, HLA-C*07:01	3	0	2	3	2	0	3	0	5	1.16912
EpI_M_20	HLA-I	M	19	28	QWNLVIGFLF	10	Yes	NA	NA	NA	QWNLVIGFLF	52851	HLA-A*23:01,HLA-A*24:02,HLA-A*29:02,Patr-A*07:01,Patr-A*09:01	HLA-A*23:01, HLA-A*24:02	1	0	2	1	1	1	0	1	1	0.627171
EpI_M_21	HLA-I	M	21	29	NLVIGFLFL	9	Yes	NA	NA	NA	NLVIGFLFL, NLVIGFLFLA	44913, 44913	HLA-A*02:01,HLA-A*02:02,HLA-A*02:03,HLA-A*02:06,HLA-A*68:02	HLA-A*02:04, HLA-A*02:22	0	0	0	0	0	0	0	0	2	0.0952381
EpI_M_22	HLA-I	M	24	32	IGFLFLTWI	9	No	NA	NA	NA	NA	NA	NA	HLA-B*52:01	0	0	0	0	0	0	0	0	1	0.047619
EpI_M_23	HLA-I	M	26	34	FLFLTWICL	9	No	NA	NA	NA	NA	NA	NA	HLA-A*02:04, HLA-A*02:17	0	0	0	0	0	0	0	0	2	0.0952381
EpI_M_24	HLA-I	M	30	37	TWICLLQF	8	No	NA	NA	NA	NA	NA	NA	HLA-A*23:01, HLA-A*24:02	1	0	2	1	1	1	0	1	1	0.627171
EpI_M_25	HLA-I	M	30	39	TWICLLQFAY	10	No	NA	NA	NA	NA	NA	NA	HLA-A*29:02	0	0	0	1	0	0	0	0	0	0.0588235
EpI_M_26	HLA-I	M	31	39	WICLLQFAY	9	No	NA	NA	NA	NA	NA	NA	HLA-A*29:02	0	0	0	1	0	0	0	0	0	0.0588235
EpI_M_27	HLA-I	M	34	42	LLQFAYANR	9	No	NA	NA	NA	NA	NA	NA	HLA-A*31:01, HLA-A*68:01	1	0	0	2	1	1	1	1	1	0.715756
EpI_M_28	HLA-I	M	35	44	LQFAYANRNR	10	No	NA	NA	NA	NA	NA	NA	HLA-A*31:01	1	0	0	1	0	0	1	1	1	0.398109
EpI_M_29	HLA-I	M	36	45	QFAYANRNRF	10	No	NA	NA	NA	NA	NA	NA	HLA-A*23:01, HLA-B*35:11, HLA-B*35:43	0	0	1	0	1	0	1	0	1	0.279062
EpI_M_30	HLA-I	M	36	44	QFAYANRNR	9	No	NA	NA	NA	NA	NA	NA	HLA-A*31:01	1	0	0	1	0	0	1	1	1	0.398109
EpI_M_31	HLA-I	M	37	47	FAYANRNRFLY	11	No	NA	NA	NA	NA	NA	NA	HLA-A*29:02, HLA-B*35:01, HLA-B*35:05, HLA-B*35:11, HLA-B*35:43	1	0	1	2	1	0	2	1	1	0.688375
EpI_M_32	HLA-I	M	37	45	FAYANRNRF	9	No	NA	NA	NA	NA	NA	NA	HLA-B*15:01, HLA-B*15:04, HLA-B*35:01, HLA-B*35:05, HLA-B*35:11, HLA-B*35:12, HLA-B*35:43, HLA-B*39:05, HLA-B*39:09, HLA-B*51:04, HLA-B*52:01, HLA-C*01:02, HLA-C*03:04, HLA-C*06:02, HLA-C*07:01, HLA-C*12:03, HLA-C*15:03, HLA-C*16:01	4	0	5	4	6	0	4	2	9	2.19935
EpI_M_33	HLA-I	M	37	46	FAYANRNRFL	10	No	NA	NA	NA	NA	NA	NA	HLA-B*51:04, HLA-C*01:02, HLA-C*03:04, HLA-C*07:01, HLA-C*15:03, HLA-C*16:01	1	0	3	1	4	0	1	1	3	0.871499
EpI_M_34	HLA-I	M	38	45	AYANRNRF	8	No	NA	NA	NA	NA	NA	NA	HLA-A*24:02	1	0	1	1	1	1	0	1	1	0.579552
EpI_M_35	HLA-I	M	38	46	AYANRNRFL	9	No	NA	NA	NA	NA	NA	NA	HLA-A*24:02, HLA-C*01:02, HLA-C*07:01	2	0	2	2	3	1	0	1	2	0.906816
EpI_M_36	HLA-I	M	38	47	AYANRNRFLY	10	No	NA	NA	NA	NA	NA	NA	HLA-A*29:02	0	0	0	1	0	0	0	0	0	0.0588235
EpI_M_37	HLA-I	M	39	47	YANRNRFLY	9	No	NA	NA	NA	NA	NA	NA	HLA-A*01:01, HLA-A*29:02, HLA-B*15:04, HLA-B*35:01, HLA-B*35:05, HLA-B*35:11, HLA-B*35:12, HLA-B*35:43, HLA-B*51:04, HLA-C*01:02, HLA-C*03:04, HLA-C*07:01, HLA-C*15:03, HLA-C*16:01	3	0	5	4	6	0	4	2	5	1.95331
EpI_M_38	HLA-I	M	39	46	YANRNRFL	8	No	NA	NA	NA	NA	NA	NA	HLA-C*01:02, HLA-C*03:04, HLA-C*16:01	0	0	2	0	3	0	0	1	2	0.478058
EpI_M_39	HLA-I	M	39	48	YANRNRFLYI	10	No	NA	NA	NA	NA	NA	NA	HLA-C*15:03	0	0	0	0	0	0	0	0	1	0.047619
EpI_M_40	HLA-I	M	40	48	ANRNRFLYI	9	No	NA	NA	NA	NA	NA	NA	HLA-B*08:01, HLA-B*52:01	1	0	1	0	0	0	0	0	1	0.150794
EpI_M_41	HLA-I	M	41	49	NRNRFLYII	9	No	NA	NA	NA	NA	NA	NA	HLA-B*39:05, HLA-B*39:09, HLA-C*07:01	1	0	1	2	1	0	0	0	2	0.374883
EpI_M_42	HLA-I	M	41	48	NRNRFLYI	8	No	NA	NA	NA	NA	NA	NA	HLA-C*07:01	1	0	1	1	1	0	0	0	0	0.220822
EpI_M_43	HLA-I	M	42	50	RNRFLYIIK	9	No	NA	NA	NA	NA	NA	NA	HLA-A*31:01	1	0	0	1	0	0	1	1	1	0.398109
EpI_M_44	HLA-I	M	42	51	RNRFLYIIKL	10	No	NA	NA	NA	NA	NA	NA	HLA-C*07:01	1	0	1	1	1	0	0	0	0	0.220822
EpI_M_45	HLA-I	M	43	51	NRFLYIIKL	9	No	NA	NA	NA	NA	NA	NA	HLA-B*39:05, HLA-B*39:09, HLA-B*40:03, HLA-B*40:04, HLA-B*52:01, HLA-C*06:02, HLA-C*07:01, HLA-C*07:02	3	0	3	4	3	0	2	1	5	1.32049
EpI_M_46	HLA-I	M	43	52	NRFLYIIKLI	10	No	NA	NA	NA	NA	NA	NA	HLA-C*07:01	1	0	1	1	1	0	0	0	0	0.220822
EpI_M_47	HLA-I	M	44	52	RFLYIIKLI	9	No	NA	NA	NA	NA	NA	NA	HLA-A*23:01, HLA-A*24:02	1	0	2	1	1	1	0	1	1	0.627171
EpI_M_48	HLA-I	M	44	53	RFLYIIKLIF	10	No	NA	NA	NA	NA	NA	NA	HLA-A*23:01, HLA-A*24:02	1	0	2	1	1	1	0	1	1	0.627171
EpI_M_49	HLA-I	M	45	54	FLYIIKLIFL	10	No	NA	NA	NA	NA	NA	NA	HLA-A*02:04, HLA-A*02:11, HLA-A*02:17	0	0	0	0	0	0	1	1	2	0.331349
EpI_M_50	HLA-I	M	45	53	FLYIIKLIF	9	No	NA	NA	NA	NA	NA	NA	HLA-A*23:01, HLA-A*29:02, HLA-B*15:01, HLA-C*01:02, HLA-C*03:04	0	0	2	1	2	0	0	1	3	0.525677
EpI_M_51	HLA-I	M	45	52	FLYIIKLI	8	No	NA	NA	NA	NA	NA	NA	HLA-B*52:01	0	0	0	0	0	0	0	0	1	0.047619
EpI_M_52	HLA-I	M	46	53	LYIIKLIF	8	No	NA	NA	NA	NA	NA	NA	HLA-A*23:01, HLA-A*24:02	1	0	2	1	1	1	0	1	1	0.627171
EpI_M_53	HLA-I	M	46	54	LYIIKLIFL	9	No	NA	NA	NA	NA	NA	NA	HLA-A*23:01, HLA-A*24:02	1	0	2	1	1	1	0	1	1	0.627171
EpI_M_54	HLA-I	M	46	55	LYIIKLIFLW	10	No	NA	NA	NA	NA	NA	NA	HLA-A*23:01, HLA-A*24:02	1	0	2	1	1	1	0	1	1	0.627171
EpI_M_55	HLA-I	M	47	55	YIIKLIFLW	9	No	NA	NA	NA	NA	NA	NA	HLA-A*23:01, HLA-A*24:02	1	0	2	1	1	1	0	1	1	0.627171
EpI_M_56	HLA-I	M	50	57	KLIFLWLL	8	No	NA	NA	NA	NA	NA	NA	HLA-A*02:04	0	0	0	0	0	0	0	0	1	0.047619
EpI_M_57	HLA-I	M	50	58	KLIFLWLLW	9	No	NA	NA	NA	NA	NA	NA	HLA-A*23:01, HLA-A*24:02	1	0	2	1	1	1	0	1	1	0.627171
EpI_M_58	HLA-I	M	53	60	FLWLLWPV	8	Yes	NA	NA	NA	FLWLLWPVT, FLWLLWPVTL, LVFLWLLWPV	16972, 16973, 40343	HLA-A*02:01,HLA-A*02:02,HLA-A*02:03,HLA-A*02:06,HLA-A*68:02	HLA-A*02:01, HLA-A*02:04, HLA-A*02:11, HLA-A*02:17	1	0	1	1	1	1	1	2	3	0.910901
EpI_M_59	HLA-I	M	53	62	FLWLLWPVTL	10	Yes	NA	NA	NA	FLWLLWPVT, FLWLLWPVTL, LWLLWPVTL	16972, 16973, 40677	HLA-A*02:01,HLA-A*02:02,HLA-A*02:03,HLA-A*02:06,HLA-A*68:02,HLA-A*23:01,HLA-A*24:02,HLA-A*29:02,Patr-A*09:01	HLA-A*02:01, HLA-A*02:04, HLA-A*02:11, HLA-A*02:17, HLA-A*02:22	1	0	1	1	1	1	1	2	4	0.95852
EpI_M_60	HLA-I	M	54	62	LWLLWPVTL	9	Yes	NA	NA	NA	FLWLLWPVTL, LWLLWPVTL	16973, 40677	HLA-A*02:01,HLA-A*02:02,HLA-A*02:03,HLA-A*02:06,HLA-A*68:02,HLA-A*23:01,HLA-A*24:02,HLA-A*29:02,Patr-A*09:01	HLA-A*23:01, HLA-A*24:02	1	0	2	1	1	1	0	1	1	0.627171
EpI_M_61	HLA-I	M	55	63	WLLWPVTLA	9	Yes	NA	NA	NA	WLLWPVTLA	72759	HLA-A*02:01,HLA-A*02:02,HLA-A*02:03,HLA-A*02:06,HLA-A*68:02	HLA-A*02:01, HLA-A*02:04, HLA-A*02:11, HLA-A*02:17, HLA-A*02:22	1	0	1	1	1	1	1	2	4	0.95852
EpI_M_62	HLA-I	M	55	62	WLLWPVTL	8	Yes	NA	NA	NA	FLWLLWPVTL, LWLLWPVTL, WLLWPVTLA	16973, 40677, 72759	HLA-A*02:01,HLA-A*02:02,HLA-A*02:03,HLA-A*02:06,HLA-A*68:02,HLA-A*23:01,HLA-A*24:02,HLA-A*29:02,Patr-A*09:01	HLA-A*02:04	0	0	0	0	0	0	0	0	1	0.047619
EpI_M_63	HLA-I	M	56	64	LLWPVTLAC	9	No	NA	NA	NA	NA	NA	NA	HLA-A*02:01, HLA-A*02:04, HLA-A*02:11	1	0	1	1	1	1	1	2	2	0.863282
EpI_M_64	HLA-I	M	56	66	LLWPVTLACFV	11	Yes	NA	NA	NA	LWPVTLACF	40685	HLA-A*23:01,HLA-A*24:02,HLA-A*29:02,Patr-A*07:01,Patr-A*09:01	HLA-A*02:01	1	0	1	1	1	1	0	1	1	0.579552
EpI_M_65	HLA-I	M	56	63	LLWPVTLA	8	Yes	NA	NA	NA	WLLWPVTLA	72759	HLA-A*02:01,HLA-A*02:02,HLA-A*02:03,HLA-A*02:06,HLA-A*68:02	HLA-A*02:04	0	0	0	0	0	0	0	0	1	0.047619
EpI_M_66	HLA-I	M	56	65	LLWPVTLACF	10	Yes	NA	NA	NA	LWPVTLACF	40685	HLA-A*23:01,HLA-A*24:02,HLA-A*29:02,Patr-A*07:01,Patr-A*09:01	HLA-B*15:01	0	0	0	0	0	0	0	0	1	0.047619
EpI_M_67	HLA-I	M	57	65	LWPVTLACF	9	Yes	NA	NA	NA	LWPVTLACF	40685	HLA-A*23:01,HLA-A*24:02,HLA-A*29:02,Patr-A*07:01,Patr-A*09:01	HLA-A*23:01, HLA-A*24:02	1	0	2	1	1	1	0	1	1	0.627171
EpI_M_68	HLA-I	M	58	66	WPVTLACFV	9	Yes	NA	NA	NA	WPVTLACFVL	72972	HLA-B*07:02,HLA-B*35:01,HLA-B*51:01,HLA-B*53:01,HLA-B*54:01,Patr-B*13:01	HLA-B*35:12, HLA-B*51:01	1	0	1	1	1	0	0	1	1	0.379552
EpI_M_69	HLA-I	M	58	67	WPVTLACFVL	10	Yes	NA	NA	NA	WPVTLACFVL	72972	HLA-B*07:02,HLA-B*35:01,HLA-B*51:01,HLA-B*53:01,HLA-B*54:01,Patr-B*13:01	HLA-B*35:12	0	0	0	0	0	0	0	0	1	0.047619
EpI_M_70	HLA-I	M	61	69	TLACFVLAA	9	Yes	TLACFVLAAV	64710	HLA-A*02:01,HLA-A*02:02,HLA-A*02:03,HLA-A*02:06,HLA-A*68:02	TLACFVLAA, TLACFVLAAV	64709, 64710	HLA-A*02:01,HLA-A*02:02,HLA-A*02:03,HLA-A*02:06,HLA-A*68:02	HLA-A*02:01, HLA-A*02:04, HLA-A*02:11, HLA-A*02:22	1	0	1	1	1	1	1	2	3	0.910901
EpI_M_71	HLA-I	M	61	70	TLACFVLAAV	10	Yes	TLACFVLAAV	64710	HLA-A*02:01,HLA-A*02:02,HLA-A*02:03,HLA-A*02:06,HLA-A*68:02	TLACFVLAA, TLACFVLAAV	64709, 64710	HLA-A*02:01,HLA-A*02:02,HLA-A*02:03,HLA-A*02:06,HLA-A*68:02	HLA-A*02:01, HLA-A*02:11, HLA-A*02:22	1	0	1	1	1	1	1	2	2	0.863282
EpI_M_72	HLA-I	M	63	71	ACFVLAAVY	9	No	NA	NA	NA	NA	NA	NA	HLA-A*29:02	0	0	0	1	0	0	0	0	0	0.0588235
EpI_M_73	HLA-I	M	63	72	ACFVLAAVYR	10	No	NA	NA	NA	NA	NA	NA	HLA-A*31:01	1	0	0	1	0	0	1	1	1	0.398109
EpI_M_74	HLA-I	M	64	72	CFVLAAVYR	9	No	NA	NA	NA	NA	NA	NA	HLA-A*31:01	1	0	0	1	0	0	1	1	1	0.398109
EpI_M_75	HLA-I	M	65	73	FVLAAVYRI	9	Yes	NA	NA	NA	FVLAAVYRI	18219	HLA-A*02:01,HLA-A*02:02,HLA-A*02:03,HLA-A*02:06,HLA-A*68:02	HLA-A*02:01, HLA-A*02:04, HLA-A*02:11, HLA-A*02:17, HLA-A*02:22, HLA-A*68:02, HLA-B*51:04, HLA-B*52:01, HLA-C*01:02, HLA-C*03:04, HLA-C*07:01, HLA-C*15:03, HLA-C*16:01	2	0	4	2	5	1	2	3	9	1.92526
EpI_M_76	HLA-I	M	65	72	FVLAAVYR	8	Yes	NA	NA	NA	FVLAAVYRI	18219	HLA-A*02:01,HLA-A*02:02,HLA-A*02:03,HLA-A*02:06,HLA-A*68:02	HLA-A*31:01, HLA-A*68:01	1	0	0	2	1	1	1	1	1	0.715756
EpI_M_77	HLA-I	M	67	75	LAAVYRINW	9	No	NA	NA	NA	NA	NA	NA	HLA-B*35:05, HLA-B*51:04	0	0	0	0	0	0	2	0	0	0.25
EpI_M_78	HLA-I	M	68	76	AAVYRINWI	9	No	NA	NA	NA	NA	NA	NA	HLA-B*51:04, HLA-B*52:01, HLA-C*15:03	0	0	0	0	0	0	1	0	2	0.220238
EpI_M_79	HLA-I	M	71	80	YRINWITGGI	10	No	NA	NA	NA	NA	NA	NA	HLA-B*39:09, HLA-C*07:01	1	0	1	2	1	0	0	0	1	0.327264
EpI_M_80	HLA-I	M	71	79	YRINWITGG	9	No	NA	NA	NA	NA	NA	NA	HLA-C*07:01	1	0	1	1	1	0	0	0	0	0.220822
EpI_M_81	HLA-I	M	72	80	RINWITGGI	9	No	NA	NA	NA	NA	NA	NA	HLA-C*15:03	0	0	0	0	0	0	0	0	1	0.047619
EpI_M_82	HLA-I	M	73	82	INWITGGIAI	10	No	NA	NA	NA	NA	NA	NA	HLA-B*52:01	0	0	0	0	0	0	0	0	1	0.047619
EpI_M_83	HLA-I	M	75	83	WITGGIAIA	9	No	NA	NA	NA	NA	NA	NA	HLA-A*68:02	0	0	0	0	0	0	0	0	1	0.047619
EpI_M_84	HLA-I	M	76	84	ITGGIAIAM	9	No	NA	NA	NA	NA	NA	NA	HLA-B*15:04, HLA-B*35:05, HLA-B*35:11, HLA-B*35:12, HLA-B*35:43, HLA-C*01:02, HLA-C*03:04, HLA-C*15:03, HLA-C*16:01	0	0	2	0	4	0	3	1	5	1.05474
EpI_M_85	HLA-I	M	80	88	IAIAMACLV	9	No	NA	NA	NA	NA	NA	NA	HLA-C*03:04	0	0	1	0	1	0	0	1	1	0.265173
EpI_M_86	HLA-I	M	82	90	IAMACLVGL	9	No	NA	NA	NA	NA	NA	NA	HLA-C*01:02, HLA-C*03:04, HLA-C*15:03, HLA-C*16:01	0	0	2	0	3	0	0	1	3	0.525677
EpI_M_87	HLA-I	M	87	95	LVGLMWLSY	9	No	NA	NA	NA	NA	NA	NA	HLA-A*29:02	0	0	0	1	0	0	0	0	0	0.0588235
EpI_M_88	HLA-I	M	89	97	GLMWLSYFI	9	No	NA	NA	NA	NA	NA	NA	HLA-A*02:01, HLA-A*02:04, HLA-A*02:11, HLA-A*02:17, HLA-A*02:22	1	0	1	1	1	1	1	2	4	0.95852
EpI_M_89	HLA-I	M	91	100	MWLSYFIASF	10	No	NA	NA	NA	NA	NA	NA	HLA-A*23:01, HLA-A*24:02	1	0	2	1	1	1	0	1	1	0.627171
EpI_M_90	HLA-I	M	91	101	MWLSYFIASFR	11	No	NA	NA	NA	NA	NA	NA	HLA-A*68:01	0	0	0	1	1	1	0	0	0	0.317647
EpI_M_91	HLA-I	M	92	101	WLSYFIASFR	10	No	NA	NA	NA	NA	NA	NA	HLA-A*68:01	0	0	0	1	1	1	0	0	0	0.317647
EpI_M_92	HLA-I	M	92	100	WLSYFIASF	9	No	NA	NA	NA	NA	NA	NA	HLA-B*15:01	0	0	0	0	0	0	0	0	1	0.047619
EpI_M_93	HLA-I	M	93	101	LSYFIASFR	9	No	NA	NA	NA	NA	NA	NA	HLA-A*03:01, HLA-A*11:01, HLA-A*31:01, HLA-A*68:01	3	0	2	3	2	2	1	1	1	1.23975
EpI_M_94	HLA-I	M	94	102	SYFIASFRL	9	No	NA	NA	NA	NA	NA	NA	HLA-A*23:01, HLA-A*24:02, HLA-B*39:05, HLA-B*39:09, HLA-B*52:01, HLA-C*01:02, HLA-C*07:01, HLA-C*16:01	2	0	4	3	4	1	0	1	5	1.26256
EpI_M_95	HLA-I	M	94	103	SYFIASFRLF	10	No	NA	NA	NA	NA	NA	NA	HLA-A*23:01, HLA-A*24:02, HLA-A*29:02	1	0	2	2	1	1	0	1	1	0.685994
EpI_M_96	HLA-I	M	94	101	SYFIASFR	8	No	NA	NA	NA	NA	NA	NA	HLA-A*31:01	1	0	0	1	0	0	1	1	1	0.398109
EpI_M_97	HLA-I	M	95	102	YFIASFRL	8	No	NA	NA	NA	NA	NA	NA	HLA-A*23:01, HLA-A*24:02	1	0	2	1	1	1	0	1	1	0.627171
EpI_M_98	HLA-I	M	95	103	YFIASFRLF	9	No	NA	NA	NA	NA	NA	NA	HLA-A*23:01, HLA-A*24:02, HLA-A*29:02, HLA-C*01:02, HLA-C*06:02, HLA-C*07:01, HLA-C*16:01	3	0	5	4	5	1	0	1	2	1.34052
EpI_M_99	HLA-I	M	96	104	FIASFRLFA	9	No	NA	NA	NA	NA	NA	NA	HLA-A*02:01, HLA-A*02:04, HLA-A*02:11, HLA-A*02:22, HLA-A*68:02	1	0	1	1	1	1	1	2	4	0.95852
EpI_M_100	HLA-I	M	96	105	FIASFRLFAR	10	No	NA	NA	NA	NA	NA	NA	HLA-A*31:01, HLA-A*68:01	1	0	0	2	1	1	1	1	1	0.715756
EpI_M_101	HLA-I	M	97	105	IASFRLFAR	9	No	NA	NA	NA	NA	NA	NA	HLA-A*11:01, HLA-A*31:01, HLA-A*68:01	2	0	1	2	1	1	1	1	1	0.818931
EpI_M_102	HLA-I	M	98	107	ASFRLFARTR	10	No	NA	NA	NA	NA	NA	NA	HLA-A*11:01, HLA-A*31:01	2	0	1	1	0	0	1	1	1	0.501284
EpI_M_103	HLA-I	M	98	105	ASFRLFAR	8	Yes	NA	NA	NA	FVASFRLFAR	18123	HLA-A*03:01,HLA-A*11:01,HLA-A*31:01,HLA-A*33:01,HLA-A*68:01,Patr-A*01:01	HLA-A*31:01	1	0	0	1	0	0	1	1	1	0.398109
EpI_M_104	HLA-I	M	99	107	SFRLFARTR	9	No	NA	NA	NA	NA	NA	NA	HLA-A*31:01	1	0	0	1	0	0	1	1	1	0.398109
EpI_M_105	HLA-I	M	100	109	FRLFARTRSM	10	No	NA	NA	NA	NA	NA	NA	HLA-B*08:01, HLA-B*39:09, HLA-C*07:01	2	0	2	2	1	0	0	0	1	0.430439
EpI_M_106	HLA-I	M	101	109	RLFARTRSM	9	No	NA	NA	NA	NA	NA	NA	HLA-A*02:04, HLA-A*02:11, HLA-A*02:22, HLA-B*07:02, HLA-B*08:01, HLA-B*15:01, HLA-B*15:04, HLA-B*35:11, HLA-B*35:43, HLA-B*52:01, HLA-C*01:02, HLA-C*03:04, HLA-C*04:01, HLA-C*06:02, HLA-C*07:01, HLA-C*07:02, HLA-C*12:03, HLA-C*15:03, HLA-C*16:01	7	0	8	5	8	0	3	4	10	2.83018
EpI_M_107	HLA-I	M	102	110	LFARTRSMW	9	Yes	NA	NA	NA	LFARTRSMW	35797	HLA-A*23:01,HLA-A*24:02	HLA-A*23:01, HLA-A*24:02	1	0	2	1	1	1	0	1	1	0.627171
EpI_M_108	HLA-I	M	102	109	LFARTRSM	8	Yes	NA	NA	NA	LFARTRSMW	35797	HLA-A*23:01,HLA-A*24:02	HLA-B*08:01	1	0	1	0	0	0	0	0	0	0.103175
EpI_M_109	HLA-I	M	103	112	FARTRSMWSF	10	No	NA	NA	NA	NA	NA	NA	HLA-B*08:01, HLA-B*35:11, HLA-B*35:43	1	0	1	0	1	0	1	0	1	0.334617
EpI_M_110	HLA-I	M	104	112	ARTRSMWSF	9	No	NA	NA	NA	NA	NA	NA	HLA-B*39:05, HLA-B*39:09, HLA-B*40:03, HLA-C*07:01	1	0	1	2	1	0	1	0	2	0.499883
EpI_M_111	HLA-I	M	108	116	SMWSFNPET	9	Yes	NA	NA	NA	SMWSFNPET	59778	HLA-A*02:01,HLA-A*02:02,HLA-A*02:03,HLA-A*02:06	HLA-A*02:01, HLA-A*02:04, HLA-A*02:11, HLA-A*02:17, HLA-A*02:22	1	0	1	1	1	1	1	2	4	0.95852
EpI_M_112	HLA-I	M	108	118	SMWSFNPETNI	11	Yes	NA	NA	NA	MWSFNPETNI, SMWSFNPET	43024, 59778	HLA-A*23:01,HLA-A*24:02,HLA-A*02:01,HLA-A*02:02,HLA-A*02:03,HLA-A*02:06	HLA-A*02:01, HLA-A*02:04	1	0	1	1	1	1	0	1	2	0.627171
EpI_M_113	HLA-I	M	109	119	MWSFNPETNIL	11	Yes	NA	NA	NA	MWSFNPETNI, SFNPETNIL	43024, 57856	HLA-A*23:01,HLA-A*24:02,HLA-A*30:02	HLA-A*24:02	1	0	1	1	1	1	0	1	1	0.579552
EpI_M_114	HLA-I	M	110	118	WSFNPETNI	9	Yes	NA	NA	NA	MWSFNPETNI	43024	HLA-A*23:01,HLA-A*24:02	HLA-A*68:02, HLA-B*51:04, HLA-B*52:01, HLA-C*01:02, HLA-C*03:04, HLA-C*05:01, HLA-C*15:02, HLA-C*15:03, HLA-C*16:01	1	0	4	1	4	0	1	1	5	1.01436
EpI_M_115	HLA-I	M	111	119	SFNPETNIL	9	Yes	NA	NA	NA	SFNPETNIL	57856	HLA-A*23:01,HLA-A*24:02,HLA-A*30:02	HLA-B*35:12, HLA-B*39:05, HLA-B*39:09, HLA-C*01:02, HLA-C*03:04, HLA-C*06:02, HLA-C*07:01, HLA-C*16:01	2	0	4	3	5	0	0	1	5	1.12138
EpI_M_116	HLA-I	M	112	120	FNPETNILL	9	No	NA	NA	NA	NA	NA	NA	HLA-B*39:05, HLA-B*39:09, HLA-C*01:02, HLA-C*07:01	1	0	1	2	2	0	0	0	3	0.481326
EpI_M_117	HLA-I	M	113	120	NPETNILL	8	No	NA	NA	NA	NA	NA	NA	HLA-B*35:12, HLA-B*51:04	0	0	0	0	0	0	1	0	1	0.172619
EpI_M_118	HLA-I	M	114	122	PETNILLNV	9	No	NA	NA	NA	NA	NA	NA	HLA-B*40:04	0	0	0	0	0	0	1	0	1	0.172619
EpI_M_119	HLA-I	M	115	122	ETNILLNV	8	No	NA	NA	NA	NA	NA	NA	HLA-A*68:02	0	0	0	0	0	0	0	0	1	0.047619
EpI_M_120	HLA-I	M	115	124	ETNILLNVPL	10	No	NA	NA	NA	NA	NA	NA	HLA-A*68:02	0	0	0	0	0	0	0	0	1	0.047619
EpI_M_121	HLA-I	M	116	124	TNILLNVPL	9	No	NA	NA	NA	NA	NA	NA	HLA-B*39:05, HLA-B*39:09	0	0	0	1	0	0	0	0	2	0.154062
EpI_M_122	HLA-I	M	120	128	LNVPLHGTI	9	No	NA	NA	NA	NA	NA	NA	HLA-B*52:01	0	0	0	0	0	0	0	0	1	0.047619
EpI_M_123	HLA-I	M	121	131	NVPLHGTILTR	11	No	NA	NA	NA	NA	NA	NA	HLA-A*68:01	0	0	0	1	1	1	0	0	0	0.317647
EpI_M_124	HLA-I	M	121	129	NVPLHGTIL	9	No	NA	NA	NA	NA	NA	NA	HLA-B*35:12, HLA-B*51:04, HLA-C*01:02, HLA-C*03:04, HLA-C*16:01	0	0	2	0	3	0	1	1	3	0.650677
EpI_M_125	HLA-I	M	122	129	VPLHGTIL	8	No	NA	NA	NA	NA	NA	NA	HLA-B*07:02, HLA-B*35:05, HLA-B*35:12, HLA-B*51:04	1	0	1	1	0	0	2	0	1	0.459617
EpI_M_126	HLA-I	M	122	130	VPLHGTILT	9	No	NA	NA	NA	NA	NA	NA	HLA-B*35:05, HLA-B*35:12	0	0	0	0	0	0	1	0	1	0.172619
EpI_M_127	HLA-I	M	126	134	GTILTRPLL	9	No	NA	NA	NA	NA	NA	NA	HLA-C*03:04, HLA-C*15:03, HLA-C*16:01	0	0	2	0	2	0	0	1	2	0.419234
EpI_M_128	HLA-I	M	130	138	TRPLLESEL	9	No	NA	NA	NA	NA	NA	NA	HLA-B*39:05, HLA-B*39:09, HLA-C*07:01	1	0	1	2	1	0	0	0	2	0.374883
EpI_M_129	HLA-I	M	131	140	RPLLESELVI	10	No	NA	NA	NA	NA	NA	NA	HLA-A*02:04, HLA-B*07:02	1	0	1	1	0	0	0	0	1	0.209617
EpI_M_130	HLA-I	M	131	138	RPLLESEL	8	No	NA	NA	NA	NA	NA	NA	HLA-B*07:02, HLA-B*35:12	1	0	1	1	0	0	0	0	1	0.209617
EpI_M_131	HLA-I	M	131	139	RPLLESELV	9	No	NA	NA	NA	NA	NA	NA	HLA-B*35:12, HLA-B*51:04	0	0	0	0	0	0	1	0	1	0.172619
EpI_M_132	HLA-I	M	133	142	LLESELVIGA	10	No	NA	NA	NA	NA	NA	NA	HLA-A*02:22	0	0	0	0	0	0	0	0	1	0.047619
EpI_M_133	HLA-I	M	134	143	LESELVIGAV	10	No	NA	NA	NA	NA	NA	NA	HLA-B*40:02, HLA-B*40:04	0	0	0	0	1	1	1	0	2	0.479062
EpI_M_134	HLA-I	M	134	142	LESELVIGA	9	No	NA	NA	NA	NA	NA	NA	HLA-B*40:03, HLA-B*40:04	0	0	0	0	0	0	2	0	1	0.297619
EpI_M_135	HLA-I	M	134	144	LESELVIGAVI	11	Yes	NA	NA	NA	SELVIGAVI	57544	HLA-B*18:01,HLA-B*40:01,HLA-B*40:02,HLA-B*44:02,HLA-B*44:03,HLA-B*45:01	HLA-B*40:04	0	0	0	0	0	0	1	0	1	0.172619
EpI_M_136	HLA-I	M	135	143	ESELVIGAV	9	No	NA	NA	NA	NA	NA	NA	HLA-A*68:02	0	0	0	0	0	0	0	0	1	0.047619
EpI_M_137	HLA-I	M	135	144	ESELVIGAVI	10	Yes	NA	NA	NA	SELVIGAVI	57544	HLA-B*18:01,HLA-B*40:01,HLA-B*40:02,HLA-B*44:02,HLA-B*44:03,HLA-B*45:01	HLA-B*40:04	0	0	0	0	0	0	1	0	1	0.172619
EpI_M_138	HLA-I	M	136	143	SELVIGAV	8	Yes	NA	NA	NA	SELVIGAVI, SELVIGAVII	57544, 57545	HLA-B*18:01,HLA-B*40:01,HLA-B*40:02,HLA-B*44:02,HLA-B*44:03,HLA-B*45:01	HLA-B*18:01, HLA-B*40:02, HLA-B*40:03, HLA-B*40:04, HLA-B*52:01	1	0	0	1	1	1	2	0	3	0.76606
EpI_M_139	HLA-I	M	136	144	SELVIGAVI	9	Yes	NA	NA	NA	SELVIGAVI, SELVIGAVII	57544, 57545	HLA-B*18:01,HLA-B*40:01,HLA-B*40:02,HLA-B*44:02,HLA-B*44:03,HLA-B*45:01	HLA-B*18:01, HLA-B*39:05, HLA-B*39:09, HLA-B*40:02, HLA-B*40:03, HLA-B*40:04, HLA-B*44:03, HLA-B*52:01	2	0	1	2	2	1	2	0	5	1.08212
EpI_M_140	HLA-I	M	136	145	SELVIGAVIL	10	Yes	NA	NA	NA	SELVIGAVI	57544	HLA-B*18:01,HLA-B*40:01,HLA-B*40:02,HLA-B*44:02,HLA-B*44:03,HLA-B*45:01	HLA-B*39:05, HLA-B*40:02, HLA-B*40:03, HLA-B*40:04, HLA-B*44:03	1	0	1	0	2	1	2	0	3	0.813679
EpI_M_141	HLA-I	M	137	146	ELVIGAVILR	10	No	NA	NA	NA	NA	NA	NA	HLA-A*68:01	0	0	0	1	1	1	0	0	0	0.317647
EpI_M_142	HLA-I	M	137	145	ELVIGAVIL	9	No	NA	NA	NA	NA	NA	NA	HLA-B*39:09	0	0	0	1	0	0	0	0	1	0.106443
EpI_M_143	HLA-I	M	138	146	LVIGAVILR	9	No	NA	NA	NA	NA	NA	NA	HLA-A*11:01, HLA-A*31:01, HLA-A*68:01	2	0	1	2	1	1	1	1	1	0.818931
EpI_M_144	HLA-I	M	139	146	VIGAVILR	8	No	NA	NA	NA	NA	NA	NA	HLA-A*68:01	0	0	0	1	1	1	0	0	0	0.317647
EpI_M_145	HLA-I	M	141	150	GAVILRGHLR	10	No	NA	NA	NA	NA	NA	NA	HLA-A*31:01, HLA-A*68:01	1	0	0	2	1	1	1	1	1	0.715756
EpI_M_146	HLA-I	M	142	150	AVILRGHLR	9	No	NA	NA	NA	NA	NA	NA	HLA-A*11:01, HLA-A*31:01, HLA-A*68:01	2	0	1	2	1	1	1	1	1	0.818931
EpI_M_147	HLA-I	M	143	150	VILRGHLR	8	No	NA	NA	NA	NA	NA	NA	HLA-A*31:01	1	0	0	1	0	0	1	1	1	0.398109
EpI_M_148	HLA-I	M	143	151	VILRGHLRI	9	No	NA	NA	NA	NA	NA	NA	HLA-C*15:03	0	0	0	0	0	0	0	0	1	0.047619
EpI_M_149	HLA-I	M	144	152	ILRGHLRIA	9	No	NA	NA	NA	NA	NA	NA	HLA-B*15:04	0	0	0	0	0	0	1	0	0	0.125
EpI_M_150	HLA-I	M	147	156	GHLRIAGHHL	10	No	NA	NA	NA	NA	NA	NA	HLA-B*39:05	0	0	0	0	0	0	0	0	1	0.047619
EpI_M_151	HLA-I	M	148	158	HLRIAGHHLGR	11	No	NA	NA	NA	NA	NA	NA	HLA-A*31:01	1	0	0	1	0	0	1	1	1	0.398109
EpI_M_152	HLA-I	M	148	156	HLRIAGHHL	9	No	NA	NA	NA	NA	NA	NA	HLA-B*15:01, HLA-B*15:04, HLA-C*01:02, HLA-C*03:04, HLA-C*15:03, HLA-C*16:01	0	0	2	0	3	0	1	1	4	0.698296
EpI_M_153	HLA-I	M	149	156	LRIAGHHL	8	No	NA	NA	NA	NA	NA	NA	HLA-B*39:05, HLA-B*39:09, HLA-C*07:01	1	0	1	2	1	0	0	0	2	0.374883
EpI_M_154	HLA-I	M	150	158	RIAGHHLGR	9	No	NA	NA	NA	NA	NA	NA	HLA-A*03:01, HLA-A*11:01, HLA-A*31:01, HLA-A*68:01	3	0	2	3	2	2	1	1	1	1.23975
EpI_M_155	HLA-I	M	154	164	HHLGRCDIKDL	11	No	NA	NA	NA	NA	NA	NA	HLA-B*39:05	0	0	0	0	0	0	0	0	1	0.047619
EpI_M_156	HLA-I	M	160	168	DIKDLPKEI	9	No	NA	NA	NA	NA	NA	NA	HLA-B*51:04	0	0	0	0	0	0	1	0	0	0.125
EpI_M_157	HLA-I	M	161	170	IKDLPKEITV	10	No	NA	NA	NA	NA	NA	NA	HLA-B*52:01	0	0	0	0	0	0	0	0	1	0.047619
EpI_M_158	HLA-I	M	162	170	KDLPKEITV	9	No	NA	NA	NA	NA	NA	NA	HLA-B*40:04, HLA-B*52:01	0	0	0	0	0	0	1	0	2	0.220238
EpI_M_159	HLA-I	M	164	172	LPKEITVAT	9	No	NA	NA	NA	NA	NA	NA	HLA-B*07:02, HLA-B*35:01, HLA-B*35:05, HLA-B*35:11, HLA-B*35:12, HLA-B*35:43	2	0	2	2	1	0	2	1	2	0.839169
EpI_M_160	HLA-I	M	166	174	KEITVATSR	9	No	NA	NA	NA	NA	NA	NA	HLA-A*31:01, HLA-B*40:03	1	0	0	1	0	0	2	1	1	0.523109
EpI_M_161	HLA-I	M	166	176	KEITVATSRTL	11	No	NA	NA	NA	NA	NA	NA	HLA-B*40:02, HLA-B*40:03, HLA-B*40:04	0	0	0	0	1	1	2	0	2	0.604062
EpI_M_162	HLA-I	M	166	173	KEITVATS	8	No	NA	NA	NA	NA	NA	NA	HLA-B*40:03	0	0	0	0	0	0	1	0	0	0.125
EpI_M_163	HLA-I	M	168	178	ITVATSRTLSY	11	Yes	NA	NA	NA	TVATSRTLSY	66952	HLA-A*01:01,HLA-A*26:01,HLA-A*29:02,HLA-A*30:02	HLA-A*01:01, HLA-A*29:02	1	0	1	2	1	0	0	0	0	0.279645
EpI_M_164	HLA-I	M	168	176	ITVATSRTL	9	No	NA	NA	NA	NA	NA	NA	HLA-B*15:04, HLA-B*35:11, HLA-B*35:12, HLA-B*35:43, HLA-B*51:04, HLA-B*52:01, HLA-C*01:02, HLA-C*03:04, HLA-C*06:02, HLA-C*07:01, HLA-C*15:03, HLA-C*16:01	2	0	4	2	6	0	3	1	6	1.544
EpI_M_165	HLA-I	M	169	178	TVATSRTLSY	10	Yes	NA	NA	NA	TVATSRTLSY	66952	HLA-A*01:01,HLA-A*26:01,HLA-A*29:02,HLA-A*30:02	HLA-A*01:01, HLA-A*03:01, HLA-A*11:01, HLA-A*29:02, HLA-A*68:01, HLA-B*15:01, HLA-B*15:04, HLA-B*35:01, HLA-B*35:05, HLA-B*35:11, HLA-B*35:43	4	0	4	5	4	2	3	1	2	1.92346
EpI_M_166	HLA-I	M	169	179	TVATSRTLSYY	11	Yes	NA	NA	NA	ATSRTLSYY, TVATSRTLSY	5149, 66952	HLA-A*03:01,HLA-A*11:01,HLA-A*31:01,HLA-A*68:01,HLA-A*01:01,HLA-A*26:01,HLA-A*29:02,HLA-A*30:02	HLA-A*29:02	0	0	0	1	0	0	0	0	0	0.0588235
EpI_M_167	HLA-I	M	170	178	VATSRTLSY	9	Yes	NA	NA	NA	TVATSRTLSY	66952	HLA-A*01:01,HLA-A*26:01,HLA-A*29:02,HLA-A*30:02	HLA-A*01:01, HLA-A*29:02, HLA-B*15:01, HLA-B*15:04, HLA-B*35:01, HLA-B*35:05, HLA-B*35:11, HLA-B*35:12, HLA-B*35:43, HLA-B*51:04, HLA-C*03:04, HLA-C*07:01, HLA-C*07:02, HLA-C*12:03, HLA-C*16:01	5	0	6	5	6	0	4	3	5	2.28198
EpI_M_168	HLA-I	M	170	179	VATSRTLSYY	10	Yes	NA	NA	NA	ATSRTLSYY	5149	HLA-A*01:01,HLA-A*03:01,HLA-A*11:01,HLA-A*26:01,HLA-A*29:02,HLA-A*30:02,HLA-A*31:01,HLA-A*68:01	HLA-B*35:05, HLA-B*35:11, HLA-B*35:43	0	0	0	0	1	0	2	0	1	0.356443
EpI_M_169	HLA-I	M	171	178	ATSRTLSY	8	Yes	NA	NA	NA	ATSRTLSYY, ATSRTLSYYK, TVATSRTLSY	5149, 5150, 66952	HLA-A*01:01,HLA-A*03:01,HLA-A*11:01,HLA-A*26:01,HLA-A*29:02,HLA-A*30:02,HLA-A*31:01,HLA-A*68:01,HLA-A*31:01,Patr-A*01:01,HLA-A*33:01,HLA-A*23:01.HLA-A*24:02	HLA-A*01:01, HLA-A*29:02, HLA-B*15:01	1	0	1	2	1	0	0	0	1	0.327264
EpI_M_170	HLA-I	M	171	179	ATSRTLSYY	9	Yes	NA	NA	NA	ATSRTLSYY, ATSRTLSYYK	5149, 5150	HLA-A*01:01,HLA-A*03:01,HLA-A*11:01,HLA-A*26:01,HLA-A*29:02,HLA-A*30:02,HLA-A*31:01,HLA-A*68:01,HLA-A*31:01,Patr-A*01:01,HLA-A*33:01	HLA-A*01:01, HLA-A*03:01, HLA-A*11:01, HLA-A*29:02, HLA-A*68:01, HLA-B*15:01, HLA-B*15:04, HLA-B*35:43	3	0	3	4	4	2	1	0	2	1.40035
EpI_M_171	HLA-I	M	171	180	ATSRTLSYYK	10	Yes	NA	NA	NA	ATSRTLSYY, ATSRTLSYYK, TSRTLSYYK	5149, 5150, 66407	HLA-A*01:01,HLA-A*03:01,HLA-A*11:01,HLA-A*26:01,HLA-A*29:02,HLA-A*30:02,HLA-A*31:01,HLA-A*68:01,HLA-A*31:01,Patr-A*01:01,HLA-A*33:01	HLA-A*03:01, HLA-A*11:01, HLA-A*31:01, HLA-A*68:01	3	0	2	3	2	2	1	1	1	1.23975
EpI_M_172	HLA-I	M	172	180	TSRTLSYYK	9	Yes	NA	NA	NA	ATSRTLSYYK, TSRTLSYYK	5150, 66407	HLA-A*03:01,HLA-A*11:01,HLA-A*31:01,HLA-A*68:01,Patr-A*01:01	HLA-A*03:01, HLA-A*11:01, HLA-A*31:01, HLA-A*68:01	3	0	2	3	2	2	1	1	1	1.23975
EpI_M_173	HLA-I	M	173	181	SRTLSYYKL	9	No	NA	NA	NA	NA	NA	NA	HLA-B*39:05, HLA-B*39:09, HLA-C*07:01	1	0	1	2	1	0	0	0	2	0.374883
EpI_M_174	HLA-I	M	177	187	SYYKLGASQRV	11	No	NA	NA	NA	NA	NA	NA	HLA-A*24:02	1	0	1	1	1	1	0	1	1	0.579552
EpI_M_175	HLA-I	M	177	186	SYYKLGASQR	10	No	NA	NA	NA	NA	NA	NA	HLA-A*31:01	1	0	0	1	0	0	1	1	1	0.398109
EpI_M_176	HLA-I	M	178	187	YYKLGASQRV	10	No	NA	NA	NA	NA	NA	NA	HLA-A*24:02	1	0	1	1	1	1	0	1	1	0.579552
EpI_M_177	HLA-I	M	178	186	YYKLGASQR	9	No	NA	NA	NA	NA	NA	NA	HLA-A*31:01	1	0	0	1	0	0	1	1	1	0.398109
EpI_M_178	HLA-I	M	179	187	YKLGASQRV	9	No	NA	NA	NA	NA	NA	NA	HLA-B*39:05, HLA-B*39:09, HLA-C*07:01	1	0	1	2	1	0	0	0	2	0.374883
EpI_M_179	HLA-I	M	184	193	SQRVAGDSGF	10	No	NA	NA	NA	NA	NA	NA	HLA-B*15:01, HLA-B*15:04, HLA-C*07:01	1	0	1	1	1	0	1	0	1	0.393441
EpI_M_180	HLA-I	M	185	193	QRVAGDSGF	9	No	NA	NA	NA	NA	NA	NA	HLA-B*39:05, HLA-B*39:09, HLA-B*40:03, HLA-C*07:01	1	0	1	2	1	0	1	0	2	0.499883
EpI_M_181	HLA-I	M	186	196	RVAGDSGFAAY	11	No	NA	NA	NA	NA	NA	NA	HLA-A*03:01, HLA-A*29:02, HLA-B*15:01, HLA-B*15:04, HLA-B*35:11, HLA-B*35:43	1	0	1	2	2	1	2	0	2	0.883707
EpI_M_182	HLA-I	M	186	193	RVAGDSGF	8	No	NA	NA	NA	NA	NA	NA	HLA-B*15:01	0	0	0	0	0	0	0	0	1	0.047619
EpI_M_183	HLA-I	M	187	196	VAGDSGFAAY	10	No	NA	NA	NA	NA	NA	NA	HLA-A*29:02, HLA-B*15:01, HLA-B*15:04, HLA-B*35:01, HLA-B*35:05, HLA-B*35:11, HLA-B*35:43	1	0	1	2	1	0	3	1	2	0.860994
EpI_M_184	HLA-I	M	188	196	AGDSGFAAY	9	No	NA	NA	NA	NA	NA	NA	HLA-B*15:04, HLA-B*35:01, HLA-B*35:05, HLA-B*35:11, HLA-B*35:43, HLA-B*40:03, HLA-C*04:01, HLA-C*07:01, HLA-C*16:01	3	0	4	3	4	0	4	2	2	1.58637
EpI_M_185	HLA-I	M	189	196	GDSGFAAY	8	No	NA	NA	NA	NA	NA	NA	HLA-B*40:03	0	0	0	0	0	0	1	0	0	0.125
EpI_M_186	HLA-I	M	190	198	DSGFAAYSR	9	No	NA	NA	NA	NA	NA	NA	HLA-A*68:01	0	0	0	1	1	1	0	0	0	0.317647
EpI_M_187	HLA-I	M	191	199	SGFAAYSRY	9	No	NA	NA	NA	NA	NA	NA	HLA-A*29:02, HLA-B*15:01, HLA-B*15:04, HLA-B*35:05, HLA-B*35:11, HLA-B*35:43, HLA-B*40:03, HLA-C*07:01, HLA-C*16:01	1	0	2	2	3	0	4	0	2	1.04015
EpI_M_188	HLA-I	M	191	200	SGFAAYSRYR	10	No	NA	NA	NA	NA	NA	NA	HLA-A*31:01, HLA-A*68:01	1	0	0	2	1	1	1	1	1	0.715756
EpI_M_189	HLA-I	M	192	199	GFAAYSRY	8	No	NA	NA	NA	NA	NA	NA	HLA-A*29:02	0	0	0	1	0	0	0	0	0	0.0588235
EpI_M_190	HLA-I	M	192	200	GFAAYSRYR	9	No	NA	NA	NA	NA	NA	NA	HLA-A*31:01	1	0	0	1	0	0	1	1	1	0.398109
EpI_M_191	HLA-I	M	193	200	FAAYSRYR	8	No	NA	NA	NA	NA	NA	NA	HLA-A*68:01	0	0	0	1	1	1	0	0	0	0.317647
EpI_M_192	HLA-I	M	193	201	FAAYSRYRI	9	No	NA	NA	NA	NA	NA	NA	HLA-A*68:02, HLA-B*35:12, HLA-B*51:04, HLA-B*52:01, HLA-C*01:02, HLA-C*03:04, HLA-C*15:03, HLA-C*16:01	0	0	2	0	3	0	1	1	6	0.793534
EpI_M_193	HLA-I	M	194	201	AAYSRYRI	8	No	NA	NA	NA	NA	NA	NA	HLA-B*52:01	0	0	0	0	0	0	0	0	1	0.047619
EpI_M_194	HLA-I	M	195	204	AYSRYRIGNY	10	No	NA	NA	NA	NA	NA	NA	HLA-A*29:02	0	0	0	1	0	0	0	0	0	0.0588235
EpI_M_195	HLA-I	M	195	205	AYSRYRIGNYK	11	No	NA	NA	NA	NA	NA	NA	HLA-A*31:01	1	0	0	1	0	0	1	1	1	0.398109
EpI_M_196	HLA-I	M	196	205	YSRYRIGNYK	10	No	NA	NA	NA	NA	NA	NA	HLA-A*03:01, HLA-A*11:01, HLA-A*31:01, HLA-A*68:01	3	0	2	3	2	2	1	1	1	1.23975
EpI_M_197	HLA-I	M	196	204	YSRYRIGNY	9	No	NA	NA	NA	NA	NA	NA	HLA-A*29:02, HLA-B*15:01, HLA-B*15:04, HLA-B*35:05, HLA-B*35:11, HLA-B*35:43, HLA-C*07:01	1	0	1	2	2	0	3	0	2	0.808707
EpI_M_198	HLA-I	M	197	206	SRYRIGNYKL	10	Yes	NA	NA	NA	RYRIGNYKL	56634	HLA-A*23:01,HLA-A*24:02,HLA-A*30:02,Patr-A*07:01,Patr-A*09:01	HLA-B*39:05, HLA-B*39:09, HLA-C*07:01	1	0	1	2	1	0	0	0	2	0.374883
EpI_M_199	HLA-I	M	197	204	SRYRIGNY	8	No	NA	NA	NA	NA	NA	NA	HLA-C*07:01	1	0	1	1	1	0	0	0	0	0.220822
EpI_M_200	HLA-I	M	198	206	RYRIGNYKL	9	Yes	NA	NA	NA	RYRIGNYKL	56634	HLA-A*23:01,HLA-A*24:02,HLA-A*30:02,Patr-A*07:01,Patr-A*09:01	HLA-A*23:01, HLA-A*24:02, HLA-C*07:01	2	0	3	2	2	1	0	1	1	0.847993
EpI_M_201	HLA-I	M	198	205	RYRIGNYK	8	Yes	NA	NA	NA	RYRIGNYKL	56634	HLA-A*23:01,HLA-A*24:02,HLA-A*30:02,Patr-A*07:01,Patr-A*09:01	HLA-A*31:01	1	0	0	1	0	0	1	1	1	0.398109
EpI_M_202	HLA-I	M	199	206	YRIGNYKL	8	Yes	NA	NA	NA	RYRIGNYKL	56634	HLA-A*23:01,HLA-A*24:02,HLA-A*30:02,Patr-A*07:01,Patr-A*09:01	HLA-B*39:05, HLA-B*39:09, HLA-C*07:01	1	0	1	2	1	0	0	0	2	0.374883
EpI_M_203	HLA-I	M	209	217	DHSSSSDNI	9	No	NA	NA	NA	NA	NA	NA	HLA-B*39:05, HLA-B*39:09	0	0	0	1	0	0	0	0	2	0.154062
EpI_M_204	HLA-I	M	209	219	DHSSSSDNIAL	11	No	NA	NA	NA	NA	NA	NA	HLA-B*39:05, HLA-B*39:09	0	0	0	1	0	0	0	0	2	0.154062
EpI_M_205	HLA-I	M	211	219	SSSSDNIAL	9	No	NA	NA	NA	NA	NA	NA	HLA-B*35:05, HLA-B*35:11, HLA-B*35:12, HLA-B*35:43, HLA-B*39:09, HLA-C*01:02, HLA-C*03:04, HLA-C*05:01, HLA-C*08:02, HLA-C*15:02, HLA-C*15:03, HLA-C*16:01	1	0	5	2	5	0	2	1	6	1.35224
EpI_M_206	HLA-I	M	212	220	SSSDNIALL	9	No	NA	NA	NA	NA	NA	NA	HLA-A*02:22, HLA-A*68:02, HLA-B*35:12, HLA-B*35:43, HLA-B*39:09, HLA-B*51:04, HLA-C*01:02, HLA-C*03:04, HLA-C*05:01, HLA-C*06:02, HLA-C*07:01, HLA-C*15:02, HLA-C*15:03, HLA-C*16:01	3	0	6	4	7	0	1	1	8	1.7165
EpI_M_207	HLA-I	M	212	221	SSSDNIALLV	10	No	NA	NA	NA	NA	NA	NA	HLA-A*68:02, HLA-C*15:03	0	0	0	0	0	0	0	0	2	0.0952381
EpI_M_208	HLA-I	M	212	219	SSSDNIAL	8	No	NA	NA	NA	NA	NA	NA	HLA-C*01:02, HLA-C*03:04, HLA-C*16:01	0	0	2	0	3	0	0	1	2	0.478058
EpI_M_209	HLA-I	M	213	221	SSDNIALLV	9	No	NA	NA	NA	NA	NA	NA	HLA-A*01:01, HLA-C*01:02, HLA-C*04:01, HLA-C*05:01, HLA-C*15:02, HLA-C*15:03, HLA-C*16:01	3	0	5	3	5	0	0	1	3	1.12932
EpI_M_210	HLA-I	M	213	220	SSDNIALL	8	No	NA	NA	NA	NA	NA	NA	HLA-C*01:02, HLA-C*05:01	1	0	1	1	2	0	0	0	1	0.327264
EpI_N_1	HLA-I	N	1	10	MSDNGPQNQR	10	No	NA	NA	NA	NA	NA	NA	HLA-A*68:01	0	0	0	1	1	1	0	0	0	0.317647
EpI_N_2	HLA-I	N	7	17	QNQRNAPRITF	11	No	NA	NA	NA	NA	NA	NA	HLA-C*07:01	1	0	1	1	1	0	0	0	0	0.220822
EpI_N_3	HLA-I	N	8	17	NQRNAPRITF	10	No	NA	NA	NA	NA	NA	NA	HLA-B*15:01, HLA-B*15:04, HLA-B*35:43, HLA-B*39:05, HLA-B*39:09, HLA-B*40:03, HLA-C*07:01	1	0	1	2	2	0	2	0	4	0.778945
EpI_N_4	HLA-I	N	8	15	NQRNAPRI	8	No	NA	NA	NA	NA	NA	NA	HLA-B*52:01	0	0	0	0	0	0	0	0	1	0.047619
EpI_N_5	HLA-I	N	9	17	QRNAPRITF	9	No	NA	NA	NA	NA	NA	NA	HLA-B*39:05, HLA-B*39:09, HLA-B*40:03, HLA-C*06:02, HLA-C*07:01, HLA-C*07:02, HLA-C*16:01	3	0	4	4	4	0	1	1	3	1.2067
EpI_N_6	HLA-I	N	9	18	QRNAPRITFG	10	No	NA	NA	NA	NA	NA	NA	HLA-C*07:01	1	0	1	1	1	0	0	0	0	0.220822
EpI_N_7	HLA-I	N	10	17	RNAPRITF	8	No	NA	NA	NA	NA	NA	NA	HLA-C*07:01	1	0	1	1	1	0	0	0	0	0.220822
EpI_N_8	HLA-I	N	23	32	STGSNQNGER	10	No	NA	NA	NA	NA	NA	NA	HLA-A*68:01	0	0	0	1	1	1	0	0	0	0.317647
EpI_N_9	HLA-I	N	30	38	GERSGARSK	9	No	NA	NA	NA	NA	NA	NA	HLA-B*40:03	0	0	0	0	0	0	1	0	0	0.125
EpI_N_10	HLA-I	N	32	40	RSGARSKQR	9	No	NA	NA	NA	NA	NA	NA	HLA-A*31:01	1	0	0	1	0	0	1	1	1	0.398109
EpI_N_11	HLA-I	N	32	41	RSGARSKQRR	10	No	NA	NA	NA	NA	NA	NA	HLA-A*31:01	1	0	0	1	0	0	1	1	1	0.398109
EpI_N_12	HLA-I	N	36	45	RSKQRRPQGL	10	No	NA	NA	NA	NA	NA	NA	HLA-B*08:01	1	0	1	0	0	0	0	0	0	0.103175
EpI_N_13	HLA-I	N	41	50	RPQGLPNNTA	10	Yes	RRPQGLPNNTASWFT	55683	qualitative binding, IFNg release	NA	NA	NA	HLA-B*07:02	1	0	1	1	0	0	0	0	0	0.161998
EpI_N_14	HLA-I	N	45	52	LPNNTASW	8	Yes	RRPQGLPNNTASWFT	55683	qualitative binding, IFNg release	NA	NA	NA	HLA-B*07:02, HLA-B*35:01, HLA-B*35:05, HLA-B*35:11, HLA-B*35:12, HLA-B*35:43, HLA-B*51:04	2	0	2	2	1	0	3	1	2	0.964169
EpI_N_15	HLA-I	N	45	53	LPNNTASWF	9	Yes	RRPQGLPNNTASWFT	55683	qualitative binding, IFNg release	NA	NA	NA	HLA-B*07:02, HLA-B*35:01, HLA-B*35:05, HLA-B*35:11, HLA-B*35:12, HLA-B*35:43, HLA-B*51:04	2	0	2	2	1	0	3	1	2	0.964169
EpI_N_16	HLA-I	N	48	56	NTASWFTAL	9	No	NA	NA	NA	NA	NA	NA	HLA-A*68:02, HLA-B*35:05, HLA-B*35:11, HLA-B*35:12, HLA-B*35:43, HLA-B*39:09, HLA-B*51:04, HLA-C*01:02, HLA-C*03:04, HLA-C*07:01, HLA-C*15:03, HLA-C*16:01	1	0	3	2	5	0	3	1	7	1.42962
EpI_N_17	HLA-I	N	48	57	NTASWFTALT	10	No	NA	NA	NA	NA	NA	NA	HLA-A*68:02	0	0	0	0	0	0	0	0	1	0.047619
EpI_N_18	HLA-I	N	49	57	TASWFTALT	9	No	NA	NA	NA	NA	NA	NA	HLA-A*68:02	0	0	0	0	0	0	0	0	1	0.047619
EpI_N_19	HLA-I	N	49	56	TASWFTAL	8	No	NA	NA	NA	NA	NA	NA	HLA-C*01:02, HLA-C*03:04, HLA-C*16:01	0	0	2	0	3	0	0	1	2	0.478058
EpI_N_20	HLA-I	N	51	61	SWFTALTQHGK	11	No	NA	NA	NA	NA	NA	NA	HLA-A*11:01	1	0	1	0	0	0	0	0	0	0.103175
EpI_N_21	HLA-I	N	52	61	WFTALTQHGK	10	No	NA	NA	NA	NA	NA	NA	HLA-A*68:01	0	0	0	1	1	1	0	0	0	0.317647
EpI_N_22	HLA-I	N	53	61	FTALTQHGK	9	No	NA	NA	NA	NA	NA	NA	HLA-A*11:01, HLA-A*68:01	1	0	1	1	1	1	0	0	0	0.420822
EpI_N_23	HLA-I	N	57	66	TQHGKEDLKF	10	No	NA	NA	NA	NA	NA	NA	HLA-B*15:01	0	0	0	0	0	0	0	0	1	0.047619
EpI_N_24	HLA-I	N	58	66	QHGKEDLKF	9	No	NA	NA	NA	NA	NA	NA	HLA-B*39:05	0	0	0	0	0	0	0	0	1	0.047619
EpI_N_25	HLA-I	N	64	72	LKFPRGQGV	9	No	NA	NA	NA	NA	NA	NA	HLA-B*39:09, HLA-B*52:01, HLA-C*07:01	1	0	1	2	1	0	0	0	2	0.374883
EpI_N_26	HLA-I	N	66	74	FPRGQGVPI	9	Yes	NA	NA	NA	FPRGQGVPI	17385	HLA-B*07:02,HLA-A*02:01,HLA-B*35:01,HLA-B*15:01,HLA-A*01:01,HLA-A*03:01,HLA-B*40:01,HLA-B*58:01,HLA-B*08:01,HLA-B*51:01,HLA-B*53:01,HLA-B*54:01	HLA-B*07:02, HLA-B*08:01, HLA-B*35:01, HLA-B*35:05, HLA-B*35:11, HLA-B*35:12, HLA-B*35:43, HLA-B*51:04, HLA-C*01:02, HLA-C*03:04	3	0	4	2	3	0	3	2	4	1.43896
EpI_N_27	HLA-I	N	77	86	NSSPDDQIGY	10	No	NA	NA	NA	NA	NA	NA	HLA-A*01:01, HLA-B*35:43	1	0	1	1	2	0	0	0	1	0.327264
EpI_N_28	HLA-I	N	77	87	NSSPDDQIGYY	11	No	NA	NA	NA	NA	NA	NA	HLA-A*01:01, HLA-B*35:05, HLA-B*35:11	1	0	1	1	1	0	2	0	0	0.470822
EpI_N_29	HLA-I	N	78	88	SSPDDQIGYYR	11	No	NA	NA	NA	NA	NA	NA	HLA-A*31:01, HLA-A*68:01	1	0	0	2	1	1	1	1	1	0.715756
EpI_N_30	HLA-I	N	78	86	SSPDDQIGY	9	No	NA	NA	NA	NA	NA	NA	HLA-B*35:05, HLA-B*35:11, HLA-B*35:43	0	0	0	0	1	0	2	0	1	0.356443
EpI_N_31	HLA-I	N	78	87	SSPDDQIGYY	10	No	NA	NA	NA	NA	NA	NA	HLA-B*35:05, HLA-B*35:11, HLA-B*35:43	0	0	0	0	1	0	2	0	1	0.356443
EpI_N_32	HLA-I	N	79	86	SPDDQIGY	8	No	NA	NA	NA	NA	NA	NA	HLA-B*35:01, HLA-B*35:05, HLA-B*35:11, HLA-B*35:43	1	0	1	1	1	0	2	1	1	0.629552
EpI_N_33	HLA-I	N	79	87	SPDDQIGYY	9	No	NA	NA	NA	NA	NA	NA	HLA-B*35:01, HLA-B*35:05, HLA-B*35:11, HLA-B*35:12, HLA-B*35:43, HLA-B*51:04, HLA-C*07:01	2	0	2	2	2	0	3	1	2	1.02299
EpI_N_34	HLA-I	N	79	88	SPDDQIGYYR	10	No	NA	NA	NA	NA	NA	NA	HLA-B*35:05, HLA-B*35:11	0	0	0	0	0	0	2	0	0	0.25
EpI_N_35	HLA-I	N	82	90	DQIGYYRRA	9	Yes	GPDDQIGYYRRATRRVRGGD, PDDQIGYYRRATRRV	21585, 47074	cytotoxicity,IFNg release, proliferation	NA	NA	NA	HLA-B*52:01	0	0	0	0	0	0	0	0	1	0.047619
EpI_N_36	HLA-I	N	83	92	QIGYYRRATR	10	Yes	GPDDQIGYYRRATRRVRGGD, PDDQIGYYRRATRRV	21585, 47074	cytotoxicity,IFNg release, proliferation	NA	NA	NA	HLA-A*31:01	1	0	0	1	0	0	1	1	1	0.398109
EpI_N_37	HLA-I	N	84	92	IGYYRRATR	9	Yes	GPDDQIGYYRRATRRVRGGD, PDDQIGYYRRATRRV	21585, 47074	cytotoxicity,IFNg release, proliferation	NA	NA	NA	HLA-A*31:01, HLA-A*68:01	1	0	0	2	1	1	1	1	1	0.715756
EpI_N_38	HLA-I	N	84	93	IGYYRRATRR	10	Yes	GPDDQIGYYRRATRRVRGGD, PDDQIGYYRRATRRV	21585, 47074	cytotoxicity,IFNg release, proliferation	NA	NA	NA	HLA-A*31:01	1	0	0	1	0	0	1	1	1	0.398109
EpI_N_39	HLA-I	N	85	92	GYYRRATR	8	Yes	GPDDQIGYYRRATRRVRGGD, PDDQIGYYRRATRRV	21585, 47074	cytotoxicity,IFNg release, proliferation	NA	NA	NA	HLA-A*31:01	1	0	0	1	0	0	1	1	1	0.398109
EpI_N_40	HLA-I	N	85	93	GYYRRATRR	9	Yes	GPDDQIGYYRRATRRVRGGD, PDDQIGYYRRATRRV	21585, 47074	cytotoxicity,IFNg release, proliferation	NA	NA	NA	HLA-A*31:01	1	0	0	1	0	0	1	1	1	0.398109
EpI_N_41	HLA-I	N	86	94	YYRRATRRI	9	No	NA	NA	NA	NA	NA	NA	HLA-A*23:01, HLA-A*24:02, HLA-C*06:02, HLA-C*07:01	3	0	4	3	3	1	0	1	1	1.06881
EpI_N_42	HLA-I	N	86	95	YYRRATRRIR	10	No	NA	NA	NA	NA	NA	NA	HLA-A*31:01	1	0	0	1	0	0	1	1	1	0.398109
EpI_N_43	HLA-I	N	87	94	YRRATRRI	8	No	NA	NA	NA	NA	NA	NA	HLA-C*06:02, HLA-C*07:01	2	0	2	2	2	0	0	0	0	0.441643
EpI_N_44	HLA-I	N	92	101	RRIRGGDGKM	10	No	NA	NA	NA	NA	NA	NA	HLA-C*07:01	1	0	1	1	1	0	0	0	0	0.220822
EpI_N_45	HLA-I	N	93	102	RIRGGDGKMK	10	No	NA	NA	NA	NA	NA	NA	HLA-A*03:01	1	0	1	1	1	1	0	0	0	0.420822
EpI_N_46	HLA-I	N	93	101	RIRGGDGKM	9	No	NA	NA	NA	NA	NA	NA	HLA-B*07:02, HLA-B*15:04, HLA-B*35:43	1	0	1	1	1	0	1	0	1	0.393441
EpI_N_47	HLA-I	N	100	109	KMKDLSPRWY	10	No	NA	NA	NA	NA	NA	NA	HLA-A*03:01, HLA-B*15:01, HLA-B*15:04	1	0	1	1	1	1	1	0	1	0.593441
EpI_N_48	HLA-I	N	100	107	KMKDLSPR	8	No	NA	NA	NA	NA	NA	NA	HLA-A*31:01	1	0	0	1	0	0	1	1	1	0.398109
EpI_N_49	HLA-I	N	100	110	KMKDLSPRWYF	11	No	NA	NA	NA	NA	NA	NA	HLA-B*15:01	0	0	0	0	0	0	0	0	1	0.047619
EpI_N_50	HLA-I	N	100	108	KMKDLSPRW	9	No	NA	NA	NA	NA	NA	NA	HLA-B*15:04, HLA-B*52:01, HLA-C*07:01	1	0	1	1	1	0	1	0	1	0.393441
EpI_N_51	HLA-I	N	102	110	KDLSPRWYF	9	No	NA	NA	NA	NA	NA	NA	HLA-B*40:03, HLA-B*40:04	0	0	0	0	0	0	2	0	1	0.297619
EpI_N_52	HLA-I	N	102	111	KDLSPRWYFY	10	No	NA	NA	NA	NA	NA	NA	HLA-B*40:03	0	0	0	0	0	0	1	0	0	0.125
EpI_N_53	HLA-I	N	103	111	DLSPRWYFY	9	No	NA	NA	NA	NA	NA	NA	HLA-A*29:02, HLA-B*35:05, HLA-B*35:11, HLA-B*35:43	0	0	0	1	1	0	2	0	1	0.415266
EpI_N_54	HLA-I	N	103	112	DLSPRWYFYY	10	Yes	NA	NA	NA	LSPRWYFYY	39576	HLA-A*01:01,HLA-A*11:01,HLA-A*23:01,HLA-A*24:02,HLA-A*29:02,HLA-A*30:02,HLA-A*31:01	HLA-A*29:02	0	0	0	1	0	0	0	0	0	0.0588235
EpI_N_55	HLA-I	N	104	111	LSPRWYFY	8	Yes	NA	NA	NA	ELSPRWYFY, ELSPRWYFYY, KELSPRWYFY, LSPRWYFYY	13278, 13279, 30515, 39576	HLA-A*26:01,HLA-A*29:02,HLA-A*30:02,HLA-A*01:01,HLA-B*40:02,HLA-B*44:02,HLA-B44:03,HLA-B*45:01,HLA-A*11:01,HLA-A*23:01,HLA-A*24:02,HLA-A*31:01	HLA-A*01:01	1	0	1	1	1	0	0	0	0	0.220822
EpI_N_56	HLA-I	N	104	112	LSPRWYFYY	9	Yes	NA	NA	NA	ELSPRWYFYY, LSPRWYFYY	13279, 39576	HLA-A*01:01,HLA-A*26:01,HLA-A*29:02,HLA-A*30:02,HLA-A*11:01,HLA-A*23:01,HLA-A*24:02,HLA-A*31:01	HLA-A*01:01, HLA-A*29:02	1	0	1	2	1	0	0	0	0	0.279645
EpI_N_57	HLA-I	N	105	113	SPRWYFYYL	9	Yes	NA	NA	NA	SPRWYFYYL	60242	HLA-B*07:02,HLA-B*51:01,HLA-B*53:01,HLA-B*54:01,HLA-B*35:01	HLA-B*07:02, HLA-B*08:01, HLA-B*35:05, HLA-B*35:12, HLA-B*51:04, HLA-C*01:02	2	0	2	1	1	0	2	0	2	0.669234
EpI_N_58	HLA-I	N	105	112	SPRWYFYY	8	Yes	NA	NA	NA	ELSPRWYFYY, LSPRWYFYY, SPRWYFYYL	13279, 39576, 60242	HLA-A*01:01,HLA-A*26:01,HLA-A*29:02,HLA-A*30:02,HLA-A*11:01,HLA-A*23:01,HLA-A*24:02,HLA-A*31:01,HLA-B*07:02,HLA-B*51:01,HLA-B*53:01,HLA-B*54:01,HLA-B*35:01	HLA-B*35:05	0	0	0	0	0	0	1	0	0	0.125
EpI_N_59	HLA-I	N	112	121	YLGTGPEAGL	10	No	NA	NA	NA	NA	NA	NA	HLA-A*02:01, HLA-A*02:04, HLA-A*02:11, HLA-A*02:22	1	0	1	1	1	1	1	2	3	0.910901
EpI_N_60	HLA-I	N	114	123	GTGPEAGLPY	10	No	NA	NA	NA	NA	NA	NA	HLA-A*01:01, HLA-A*11:01, HLA-A*29:02, HLA-B*15:01, HLA-B*15:04	2	0	2	2	1	0	1	0	1	0.555439
EpI_N_61	HLA-I	N	115	123	TGPEAGLPY	9	No	NA	NA	NA	NA	NA	NA	HLA-B*35:05, HLA-B*35:11, HLA-B*35:43	0	0	0	0	1	0	2	0	1	0.356443
EpI_N_62	HLA-I	N	116	123	GPEAGLPY	8	No	NA	NA	NA	NA	NA	NA	HLA-B*35:05, HLA-B*35:11, HLA-B*35:43	0	0	0	0	1	0	2	0	1	0.356443
EpI_N_63	HLA-I	N	118	127	EAGLPYGANK	10	No	NA	NA	NA	NA	NA	NA	HLA-A*68:01	0	0	0	1	1	1	0	0	0	0.317647
EpI_N_64	HLA-I	N	119	127	AGLPYGANK	9	No	NA	NA	NA	NA	NA	NA	HLA-A*11:01	1	0	1	0	0	0	0	0	0	0.103175
EpI_N_65	HLA-I	N	121	130	LPYGANKDGI	10	No	NA	NA	NA	NA	NA	NA	HLA-B*35:12, HLA-B*51:04	0	0	0	0	0	0	1	0	1	0.172619
EpI_N_66	HLA-I	N	121	131	LPYGANKDGII	11	No	NA	NA	NA	NA	NA	NA	HLA-B*51:04	0	0	0	0	0	0	1	0	0	0.125
EpI_N_67	HLA-I	N	122	132	PYGANKDGIIW	11	No	NA	NA	NA	NA	NA	NA	HLA-A*24:02	1	0	1	1	1	1	0	1	1	0.579552
EpI_N_68	HLA-I	N	126	134	NKDGIIWVA	9	No	NA	NA	NA	NA	NA	NA	HLA-B*39:05, HLA-B*39:09	0	0	0	1	0	0	0	0	2	0.154062
EpI_N_69	HLA-I	N	130	138	IIWVATEGA	9	No	NA	NA	NA	NA	NA	NA	HLA-A*02:04	0	0	0	0	0	0	0	0	1	0.047619
EpI_N_70	HLA-I	N	134	143	ATEGALNTPK	10	Yes	NA	NA	NA	ATEGALNTPK	4936	HLA-A*03:01,HLA-A*11:01,HLA-A*31:01,HLA-A*68:01	HLA-A*03:01, HLA-A*11:01, HLA-A*68:01	2	0	2	2	2	2	0	0	0	0.841643
EpI_N_71	HLA-I	N	138	146	ALNTPKDHI	9	Yes	ALNTPKDHI	2802	HLA-A*02:01, IFNg release	ALNTPKDHI	2802	HLA-A*02:01,IFNg release	HLA-A*02:22	0	0	0	0	0	0	0	0	1	0.047619
EpI_N_72	HLA-I	N	140	149	NTPKDHIGTR	10	No	NA	NA	NA	NA	NA	NA	HLA-A*68:01	0	0	0	1	1	1	0	0	0	0.317647
EpI_N_73	HLA-I	N	144	152	DHIGTRNPA	9	No	NA	NA	NA	NA	NA	NA	HLA-B*39:05, HLA-B*39:09	0	0	0	1	0	0	0	0	2	0.154062
EpI_N_74	HLA-I	N	148	156	TRNPANNAA	9	No	NA	NA	NA	NA	NA	NA	HLA-B*39:05, HLA-B*39:09, HLA-C*07:01	1	0	1	2	1	0	0	0	2	0.374883
EpI_N_75	HLA-I	N	148	157	TRNPANNAAI	10	No	NA	NA	NA	NA	NA	NA	HLA-B*39:05, HLA-B*39:09, HLA-C*07:01	1	0	1	2	1	0	0	0	2	0.374883
EpI_N_76	HLA-I	N	150	157	NPANNAAI	8	No	NA	NA	NA	NA	NA	NA	HLA-B*07:02, HLA-B*35:12, HLA-B*51:04	1	0	1	1	0	0	1	0	1	0.334617
EpI_N_77	HLA-I	N	150	158	NPANNAAIV	9	No	NA	NA	NA	NA	NA	NA	HLA-B*07:02, HLA-B*35:05, HLA-B*35:11, HLA-B*35:12, HLA-B*35:43, HLA-B*51:04	1	0	1	1	1	0	3	0	2	0.69106
EpI_N_78	HLA-I	N	150	159	NPANNAAIVL	10	No	NA	NA	NA	NA	NA	NA	HLA-B*07:02, HLA-B*35:05, HLA-B*35:11, HLA-B*35:12, HLA-B*35:43, HLA-B*51:04	1	0	1	1	1	0	3	0	2	0.69106
EpI_N_79	HLA-I	N	151	159	PANNAAIVL	9	No	NA	NA	NA	NA	NA	NA	HLA-C*03:04	0	0	1	0	1	0	0	1	1	0.265173
EpI_N_80	HLA-I	N	153	161	NNAAIVLQL	9	No	NA	NA	NA	NA	NA	NA	HLA-A*68:02, HLA-B*39:05, HLA-B*39:09, HLA-B*52:01	0	0	0	1	0	0	0	0	4	0.2493
EpI_N_81	HLA-I	N	154	161	NAAIVLQL	8	No	NA	NA	NA	NA	NA	NA	HLA-B*51:04	0	0	0	0	0	0	1	0	0	0.125
EpI_N_82	HLA-I	N	158	167	VLQLPQGTTL	10	Yes	LQLPQGTTL	38881	HLA-A*02:01, IFNg release	LQLPQGTTL, VLQLPQGTTL	38881, 69720	HLA-A*02:01,IFNg release	HLA-A*02:04, HLA-A*02:22, HLA-B*15:04, HLA-B*39:05, HLA-B*39:09, HLA-B*52:01, HLA-C*01:02	0	0	0	1	1	0	1	0	6	0.528361
EpI_N_83	HLA-I	N	159	167	LQLPQGTTL	9	Yes	LQLPQGTTL	38881	HLA-A*02:01, IFNg release	LQLPQGTTL, VLQLPQGTTL	38881, 69720	HLA-A*02:01,IFNg release	HLA-A*02:04, HLA-B*15:01, HLA-B*15:04, HLA-B*35:11, HLA-B*35:12, HLA-B*35:43, HLA-B*39:05, HLA-B*39:09, HLA-B*40:03, HLA-B*40:04, HLA-B*51:04, HLA-B*52:01, HLA-C*01:02, HLA-C*03:04, HLA-C*07:01, HLA-C*15:02, HLA-C*15:03, HLA-C*16:01	1	0	4	2	5	0	5	1	11	1.91772
EpI_N_84	HLA-I	N	160	169	QLPQGTTLPK	10	Yes	NA	NA	NA	QLPQGTTLPK	51482	HLA-A*03:01,HLA-A*11:01,HLA-A*68:01	HLA-A*03:01, HLA-A*11:01	2	0	2	1	1	1	0	0	0	0.523996
EpI_N_85	HLA-I	N	164	172	GTTLPKGFY	9	Yes	NA	NA	NA	GTTLPKGFY	22856	HLA-A*26:01,HLA-A*29:02,HLA-A*30:02	HLA-A*29:02	0	0	0	1	0	0	0	0	0	0.0588235
EpI_N_86	HLA-I	N	165	173	TTLPKGFYA	9	Yes	NA	NA	NA	TTLPKGFYA	66706	HLA-A*02:01	HLA-A*02:04, HLA-A*68:02, HLA-C*15:03	0	0	0	0	0	0	0	0	3	0.142857
EpI_N_87	HLA-I	N	165	172	TTLPKGFY	8	Yes	NA	NA	NA	GTTLPKGFY, TTLPKGFYA	22856, 66706	HLA-A*26:01,HLA-A*29:02,HLA-A*30:02,HLA-A*02:01	HLA-A*29:02	0	0	0	1	0	0	0	0	0	0.0588235
EpI_N_88	HLA-I	N	169	177	KGFYAEGSR	9	No	NA	NA	NA	NA	NA	NA	HLA-A*31:01	1	0	0	1	0	0	1	1	1	0.398109
EpI_N_89	HLA-I	N	177	185	RGGSQASSR	9	No	NA	NA	NA	NA	NA	NA	HLA-A*31:01	1	0	0	1	0	0	1	1	1	0.398109
EpI_N_90	HLA-I	N	180	189	SQASSRSSSR	10	Yes	NA	NA	NA	SQASSRSSSR	60380	HLA-A*11:01,HLA-A*31:01,HLA-A*33:01,HLA-A*68:01	HLA-A*68:01	0	0	0	1	1	1	0	0	0	0.317647
EpI_N_91	HLA-I	N	181	189	QASSRSSSR	9	Yes	NA	NA	NA	SQASSRSSSR	60380	HLA-A*11:01,HLA-A*31:01,HLA-A*33:01,HLA-A*68:01	HLA-A*31:01, HLA-A*68:01	1	0	0	2	1	1	1	1	1	0.715756
EpI_N_92	HLA-I	N	182	191	ASSRSSSRSR	10	No	NA	NA	NA	NA	NA	NA	HLA-A*31:01	1	0	0	1	0	0	1	1	1	0.398109
EpI_N_93	HLA-I	N	183	191	SSRSSSRSR	9	No	NA	NA	NA	NA	NA	NA	HLA-A*31:01	1	0	0	1	0	0	1	1	1	0.398109
EpI_N_94	HLA-I	N	185	195	RSSSRSRNSSR	11	No	NA	NA	NA	NA	NA	NA	HLA-A*31:01	1	0	0	1	0	0	1	1	1	0.398109
EpI_N_95	HLA-I	N	186	195	SSSRSRNSSR	10	No	NA	NA	NA	NA	NA	NA	HLA-A*31:01	1	0	0	1	0	0	1	1	1	0.398109
EpI_N_96	HLA-I	N	187	195	SSRSRNSSR	9	No	NA	NA	NA	NA	NA	NA	HLA-A*31:01	1	0	0	1	0	0	1	1	1	0.398109
EpI_N_97	HLA-I	N	195	203	RNSTPGSSR	9	No	NA	NA	NA	NA	NA	NA	HLA-A*31:01	1	0	0	1	0	0	1	1	1	0.398109
EpI_N_98	HLA-I	N	201	209	SSRGTSPAR	9	No	NA	NA	NA	NA	NA	NA	HLA-A*31:01, HLA-A*68:01	1	0	0	2	1	1	1	1	1	0.715756
EpI_N_99	HLA-I	N	202	210	SRGTSPARM	9	No	NA	NA	NA	NA	NA	NA	HLA-B*39:05, HLA-B*39:09, HLA-C*06:02, HLA-C*07:01	2	0	2	3	2	0	0	0	2	0.595705
EpI_N_100	HLA-I	N	210	219	MAGNGGDAAL	10	No	NA	NA	NA	NA	NA	NA	HLA-B*35:01, HLA-B*35:05, HLA-B*35:11, HLA-B*35:12, HLA-B*35:43, HLA-C*03:04	1	0	2	1	2	0	2	2	3	0.942344
EpI_N_101	HLA-I	N	211	219	AGNGGDAAL	9	No	NA	NA	NA	NA	NA	NA	HLA-C*01:02, HLA-C*03:04, HLA-C*05:01, HLA-C*16:01	1	0	3	1	4	0	0	1	2	0.69888
EpI_N_102	HLA-I	N	213	221	NGGDAALAL	9	No	NA	NA	NA	NA	NA	NA	HLA-B*35:12, HLA-B*39:05, HLA-C*03:04	0	0	1	0	1	0	0	1	3	0.360411
EpI_N_103	HLA-I	N	214	222	GGDAALALL	9	No	NA	NA	NA	NA	NA	NA	HLA-C*01:02, HLA-C*15:03	0	0	0	0	1	0	0	0	2	0.154062
EpI_N_104	HLA-I	N	215	223	GDAALALLL	9	No	NA	NA	NA	NA	NA	NA	HLA-B*40:03, HLA-B*40:04	0	0	0	0	0	0	2	0	1	0.297619
EpI_N_105	HLA-I	N	216	224	DAALALLLL	9	No	NA	NA	NA	NA	NA	NA	HLA-B*35:05, HLA-B*35:11, HLA-B*35:12, HLA-B*51:04, HLA-B*52:01	0	0	0	0	0	0	3	0	2	0.470238
EpI_N_106	HLA-I	N	216	223	DAALALLL	8	No	NA	NA	NA	NA	NA	NA	HLA-B*51:04	0	0	0	0	0	0	1	0	0	0.125
EpI_N_107	HLA-I	N	217	224	AALALLLL	8	No	NA	NA	NA	NA	NA	NA	HLA-B*52:01	0	0	0	0	0	0	0	0	1	0.047619
EpI_N_108	HLA-I	N	218	226	ALALLLLDR	9	Yes	NA	NA	NA	ALALLLLDR, GETALALLLLDRLNQ	2431, 19443	HLA-A*03:01,HLA-A*02:01,HLA-A*02:07,HLA-B*40:01,HLA-B*46:01,IFNg release	HLA-A*31:01	1	0	0	1	0	0	1	1	1	0.398109
EpI_N_109	HLA-I	N	220	230	ALLLLDRLNQL	11	Yes	LLLDRLNQL	37473	HLA-A*02:01, IFNg release,cytotoxicity, pathogen burden after challenge	LLLDRLNQL, LLLLDRLNQL, LLLLDRLNQ	37473, 37515, 193498	HLA-A*02:01, cytotoxicity, IFNg release,pathogen burden after challenge	HLA-A*02:04, HLA-A*02:22	0	0	0	0	0	0	0	0	2	0.0952381
EpI_N_110	HLA-I	N	221	230	LLLLDRLNQL	10	Yes	LLLDRLNQL	37473	HLA-A*02:01, IFNg release,cytotoxicity, pathogen burden after challenge	LLLDRLNQL, LLLLDRLNQL, LLLLDRLNQ	37473, 37515, 193498	HLA-A*02:01, cytotoxicity, IFNg release,pathogen burden after challenge	HLA-A*02:04, HLA-A*02:22	0	0	0	0	0	0	0	0	2	0.0952381
EpI_N_111	HLA-I	N	222	230	LLLDRLNQL	9	Yes	LLLDRLNQL	37473	HLA-A*02:01, IFNg release,cytotoxicity, pathogen burden after challenge	LLLDRLNQL, LLLLDRLNQL	37473, 37515	HLA-A*02:01, cytotoxicity, IFNg release,pathogen burden after challenge	HLA-A*02:01, HLA-A*02:04, HLA-A*02:11, HLA-A*02:17, HLA-A*02:22, HLA-B*08:01, HLA-B*15:04, HLA-B*39:09, HLA-C*01:02, HLA-C*03:04, HLA-C*07:01, HLA-C*15:03, HLA-C*16:01	3	0	5	3	5	1	2	3	8	2.03964
EpI_N_112	HLA-I	N	226	234	RLNQLESKM	9	No	NA	NA	NA	NA	NA	NA	HLA-A*02:04, HLA-A*02:22, HLA-B*15:04, HLA-C*01:02, HLA-C*15:03, HLA-C*16:01	0	0	1	0	2	0	1	0	4	0.480742
EpI_N_113	HLA-I	N	226	233	RLNQLESK	8	Yes	RLNQLESKV	54690	HLA-A*02:01, IFNg release,cytotoxicity, pathogen burden after challenge	RLNQLESKV	54690	HLA-A*02:01, cytotoxicity, IFNg release	HLA-A*03:01	1	0	1	1	1	1	0	0	0	0.420822
EpI_N_114	HLA-I	N	229	237	QLESKMSGK	9	No	NA	NA	NA	NA	NA	NA	HLA-A*03:01	1	0	1	1	1	1	0	0	0	0.420822
EpI_N_115	HLA-I	N	238	246	GQQQQGQTV	9	No	NA	NA	NA	NA	NA	NA	HLA-B*15:04, HLA-B*39:05, HLA-B*52:01	0	0	0	0	0	0	1	0	2	0.220238
EpI_N_116	HLA-I	N	240	248	QQQGQTVTK	9	Yes	NA	NA	NA	QQQGQTVTK, QQQGQTVTKK, QQQQGQTVTK	52114, 52115, 52129	HLA-A*11:01,HLA-A*31:01,HLA-A*11:01	HLA-A*11:01	1	0	1	0	0	0	0	0	0	0.103175
EpI_N_117	HLA-I	N	249	257	KSAAEASKK	9	No	NA	NA	NA	NA	NA	NA	HLA-A*03:01, HLA-A*11:01	2	0	2	1	1	1	0	0	0	0.523996
EpI_N_118	HLA-I	N	250	259	SAAEASKKPR	10	No	NA	NA	NA	NA	NA	NA	HLA-A*68:01	0	0	0	1	1	1	0	0	0	0.317647
EpI_N_119	HLA-I	N	253	261	EASKKPRQK	9	No	NA	NA	NA	NA	NA	NA	HLA-A*68:01	0	0	0	1	1	1	0	0	0	0.317647
EpI_N_120	HLA-I	N	254	262	ASKKPRQKR	9	No	NA	NA	NA	NA	NA	NA	HLA-A*31:01	1	0	0	1	0	0	1	1	1	0.398109
EpI_N_121	HLA-I	N	257	264	KPRQKRTA	8	No	NA	NA	NA	NA	NA	NA	HLA-B*07:02	1	0	1	1	0	0	0	0	0	0.161998
EpI_N_122	HLA-I	N	257	265	KPRQKRTAT	9	No	NA	NA	NA	NA	NA	NA	HLA-B*07:02, HLA-B*08:01	2	0	2	1	0	0	0	0	0	0.265173
EpI_N_123	HLA-I	N	257	267	KPRQKRTATKA	11	No	NA	NA	NA	NA	NA	NA	HLA-B*07:02	1	0	1	1	0	0	0	0	0	0.161998
EpI_N_124	HLA-I	N	259	268	RQKRTATKAY	10	No	NA	NA	NA	NA	NA	NA	HLA-B*15:01, HLA-B*15:04, HLA-B*40:03	0	0	0	0	0	0	2	0	1	0.297619
EpI_N_125	HLA-I	N	259	267	RQKRTATKA	9	No	NA	NA	NA	NA	NA	NA	HLA-B*15:04	0	0	0	0	0	0	1	0	0	0.125
EpI_N_126	HLA-I	N	260	268	QKRTATKAY	9	No	NA	NA	NA	NA	NA	NA	HLA-B*40:03	0	0	0	0	0	0	1	0	0	0.125
EpI_N_127	HLA-I	N	262	270	RTATKAYNV	9	No	NA	NA	NA	NA	NA	NA	HLA-A*02:04, HLA-A*68:02, HLA-C*15:03, HLA-C*16:01	0	0	1	0	1	0	0	0	3	0.2493
EpI_N_128	HLA-I	N	264	274	ATKAYNVTQAF	11	No	NA	NA	NA	NA	NA	NA	HLA-B*15:01	0	0	0	0	0	0	0	0	1	0.047619
EpI_N_129	HLA-I	N	265	274	TKAYNVTQAF	10	No	NA	NA	NA	NA	NA	NA	HLA-B*15:04, HLA-B*35:05, HLA-B*35:11, HLA-B*35:43, HLA-B*51:04, HLA-C*03:04, HLA-C*16:01	0	0	2	0	3	0	4	1	2	0.978058
EpI_N_130	HLA-I	N	266	276	KAYNVTQAFGR	11	No	NA	NA	NA	NA	NA	NA	HLA-A*11:01, HLA-A*31:01	2	0	1	1	0	0	1	1	1	0.501284
EpI_N_131	HLA-I	N	266	274	KAYNVTQAF	9	No	NA	NA	NA	NA	NA	NA	HLA-B*15:01, HLA-B*15:04, HLA-B*35:01, HLA-B*35:05, HLA-B*35:11, HLA-B*35:12, HLA-B*35:43, HLA-B*40:03, HLA-B*51:04, HLA-B*52:01, HLA-C*01:02, HLA-C*03:03, HLA-C*03:04, HLA-C*04:01, HLA-C*06:02, HLA-C*07:01, HLA-C*07:02, HLA-C*12:03, HLA-C*15:02, HLA-C*15:03, HLA-C*16:01	6	0	9	5	8	0	5	4	9	3.02463
EpI_N_132	HLA-I	N	266	275	KAYNVTQAFG	10	No	NA	NA	NA	NA	NA	NA	HLA-C*16:01	0	0	1	0	1	0	0	0	0	0.106443
EpI_N_133	HLA-I	N	267	274	AYNVTQAF	8	No	NA	NA	NA	NA	NA	NA	HLA-A*23:01, HLA-A*24:02, HLA-B*35:05, HLA-B*35:11, HLA-B*35:43	1	0	2	1	2	1	2	1	2	0.983613
EpI_N_134	HLA-I	N	267	276	AYNVTQAFGR	10	No	NA	NA	NA	NA	NA	NA	HLA-A*31:01	1	0	0	1	0	0	1	1	1	0.398109
EpI_N_135	HLA-I	N	267	277	AYNVTQAFGRR	11	No	NA	NA	NA	NA	NA	NA	HLA-A*31:01	1	0	0	1	0	0	1	1	1	0.398109
EpI_N_136	HLA-I	N	268	276	YNVTQAFGR	9	No	NA	NA	NA	NA	NA	NA	HLA-A*68:01	0	0	0	1	1	1	0	0	0	0.317647
EpI_N_137	HLA-I	N	268	277	YNVTQAFGRR	10	No	NA	NA	NA	NA	NA	NA	HLA-A*68:01	0	0	0	1	1	1	0	0	0	0.317647
EpI_N_138	HLA-I	N	269	277	NVTQAFGRR	9	No	NA	NA	NA	NA	NA	NA	HLA-A*31:01, HLA-A*68:01	1	0	0	2	1	1	1	1	1	0.715756
EpI_N_139	HLA-I	N	278	286	GPEQTQGNF	9	No	NA	NA	NA	NA	NA	NA	HLA-B*35:05, HLA-B*35:11, HLA-B*35:12, HLA-B*35:43, HLA-B*51:04	0	0	0	0	1	0	3	0	2	0.529062
EpI_N_140	HLA-I	N	284	292	GNFGDQELI	9	No	NA	NA	NA	NA	NA	NA	HLA-B*52:01	0	0	0	0	0	0	0	0	1	0.047619
EpI_N_141	HLA-I	N	289	298	QELIRQGTDY	10	No	NA	NA	NA	NA	NA	NA	HLA-B*40:03, HLA-B*44:03	1	0	1	0	1	0	1	0	0	0.286998
EpI_N_142	HLA-I	N	290	299	ELIRQGTDYK	10	No	NA	NA	NA	NA	NA	NA	HLA-A*68:01	0	0	0	1	1	1	0	0	0	0.317647
EpI_N_143	HLA-I	N	290	298	ELIRQGTDY	9	No	NA	NA	NA	NA	NA	NA	HLA-B*15:01, HLA-B*15:04, HLA-B*35:05, HLA-B*35:11, HLA-B*35:43	0	0	0	0	1	0	3	0	2	0.529062
EpI_N_144	HLA-I	N	291	299	LIRQGTDYK	9	No	NA	NA	NA	NA	NA	NA	HLA-A*03:01, HLA-A*11:01, HLA-A*68:01	2	0	2	2	2	2	0	0	0	0.841643
EpI_N_145	HLA-I	N	291	298	LIRQGTDY	8	No	NA	NA	NA	NA	NA	NA	HLA-B*15:01, HLA-B*35:43	0	0	0	0	1	0	0	0	2	0.154062
EpI_N_146	HLA-I	N	296	304	TDYKHWPQI	9	No	NA	NA	NA	NA	NA	NA	HLA-B*40:04, HLA-B*52:01	0	0	0	0	0	0	1	0	2	0.220238
EpI_N_147	HLA-I	N	297	307	DYKHWPQIAQF	11	No	NA	NA	NA	NA	NA	NA	HLA-A*24:02	1	0	1	1	1	1	0	1	1	0.579552
EpI_N_148	HLA-I	N	298	307	YKHWPQIAQF	10	No	NA	NA	NA	NA	NA	NA	HLA-B*39:05, HLA-B*39:09, HLA-C*07:01	1	0	1	2	1	0	0	0	2	0.374883
EpI_N_149	HLA-I	N	299	307	KHWPQIAQF	9	No	NA	NA	NA	NA	NA	NA	HLA-A*23:01, HLA-A*24:02, HLA-B*39:05, HLA-B*39:09, HLA-B*40:03, HLA-B*52:01, HLA-C*04:01, HLA-C*07:01	3	0	4	4	3	1	1	2	5	1.55423
EpI_N_150	HLA-I	N	300	307	HWPQIAQF	8	No	NA	NA	NA	NA	NA	NA	HLA-A*23:01, HLA-A*24:02	1	0	2	1	1	1	0	1	1	0.627171
EpI_N_151	HLA-I	N	303	311	QIAQFAPSA	9	No	NA	NA	NA	NA	NA	NA	HLA-A*68:02	0	0	0	0	0	0	0	0	1	0.047619
EpI_N_152	HLA-I	N	304	314	IAQFAPSASAF	11	Yes	NA	NA	NA	AQFAPSASA	3956	HLA-A*02:01,HLA-A*02:02,HLA-A*02:03,HLA-A*02:06	HLA-B*15:01, HLA-B*35:05, HLA-B*35:11, HLA-B*35:43	0	0	0	0	1	0	2	0	2	0.404062
EpI_N_153	HLA-I	N	304	313	IAQFAPSASA	10	Yes	NA	NA	NA	AQFAPSASA	3956	HLA-A*02:01,HLA-A*02:02,HLA-A*02:03,HLA-A*02:06	HLA-B*15:04	0	0	0	0	0	0	1	0	0	0.125
EpI_N_154	HLA-I	N	305	313	AQFAPSASA	9	Yes	NA	NA	NA	AQFAPSASA	3956	HLA-A*02:01,HLA-A*02:02,HLA-A*02:03,HLA-A*02:06	HLA-A*02:04, HLA-A*02:22, HLA-B*15:01, HLA-B*15:04, HLA-B*39:05, HLA-B*39:09, HLA-B*40:03, HLA-B*40:04, HLA-B*52:01	0	0	0	1	0	0	3	0	7	0.767157
EpI_N_155	HLA-I	N	305	314	AQFAPSASAF	10	Yes	NA	NA	NA	AQFAPSASA	3956	HLA-A*02:01,HLA-A*02:02,HLA-A*02:03,HLA-A*02:06	HLA-B*15:01, HLA-B*15:04, HLA-B*35:43, HLA-B*39:05, HLA-B*40:03, HLA-B*40:04, HLA-B*44:03, HLA-B*52:01	1	0	1	0	2	0	3	0	5	0.833917
EpI_N_156	HLA-I	N	305	315	AQFAPSASAFF	11	Yes	NA	NA	NA	AQFAPSASA, FAPSASAFF	3956, 923297	HLA-A*02:01,HLA-A*02:02,HLA-A*02:03,HLA-A*02:06,Ptal-N*01:01	HLA-B*15:01, HLA-B*15:04, HLA-B*40:03	0	0	0	0	0	0	2	0	1	0.297619
EpI_N_157	HLA-I	N	305	312	AQFAPSAS	8	Yes	NA	NA	NA	AQFAPSASA	3956	HLA-A*02:01,HLA-A*02:02,HLA-A*02:03,HLA-A*02:06	HLA-B*15:04	0	0	0	0	0	0	1	0	0	0.125
EpI_N_158	HLA-I	N	306	314	QFAPSASAF	9	No	NA	NA	NA	NA	NA	NA	HLA-A*23:01, HLA-A*24:02, HLA-A*29:02, HLA-B*15:01, HLA-B*15:04, HLA-B*35:01, HLA-B*35:05, HLA-B*35:11, HLA-B*35:43, HLA-C*01:02, HLA-C*06:02, HLA-C*07:01, HLA-C*16:01	4	0	6	5	6	1	3	2	4	2.14269
EpI_N_159	HLA-I	N	306	315	QFAPSASAFF	10	Yes	NA	NA	NA	FAPSASAFF	923297	Ptal-N*01:01	HLA-A*23:01, HLA-A*24:02, HLA-A*29:02	1	0	2	2	1	1	0	1	1	0.685994
EpI_N_160	HLA-I	N	307	315	FAPSASAFF	9	Yes	NA	NA	NA	FAPSASAFF	923297	Ptal-N*01:01	HLA-B*15:01, HLA-B*35:01, HLA-B*35:05, HLA-B*35:11, HLA-B*35:12, HLA-B*35:43, HLA-B*51:04, HLA-C*01:02, HLA-C*03:04, HLA-C*05:01, HLA-C*07:01, HLA-C*07:02, HLA-C*15:02, HLA-C*15:03, HLA-C*16:01	4	0	7	4	7	0	3	3	7	2.24428
EpI_N_161	HLA-I	N	307	314	FAPSASAF	8	Yes	NA	NA	NA	FAPSASAFF	923297	Ptal-N*01:01	HLA-B*35:01, HLA-B*35:05, HLA-B*35:11, HLA-B*35:12, HLA-B*35:43, HLA-B*51:04, HLA-C*01:02, HLA-C*03:03, HLA-C*03:04, HLA-C*12:03, HLA-C*16:01	2	0	4	1	4	0	3	2	4	1.3834
EpI_N_162	HLA-I	N	308	315	APSASAFF	8	Yes	NA	NA	NA	APSASAFFGM, FAPSASAFF	3810, 923297	HLA-B*07:02,HLA-B*35:01,HLA-B*51:01,HLA-B*54:01, Ptal-N*01:01	HLA-B*07:02, HLA-B*35:05, HLA-B*35:11, HLA-B*35:43, HLA-B*51:04	1	0	1	1	1	0	3	0	1	0.643441
EpI_N_163	HLA-I	N	308	317	APSASAFFGM	10	Yes	NA	NA	NA	APSASAFFGM	3810	HLA-B*07:02,HLA-B*35:01,HLA-B*51:01,HLA-B*54:01	HLA-B*07:02	1	0	1	1	0	0	0	0	0	0.161998
EpI_N_164	HLA-I	N	310	319	SASAFFGMSR	10	Yes	NA	NA	NA	ASAFFGMSR, SASAFFGMSR	4307, 56979	HLA-A*03:01,HLA-A*11:01,HLA-A*31:01,HLA-A*68:01,HLA-A*33:01	HLA-A*11:01, HLA-A*31:01, HLA-A*68:01	2	0	1	2	1	1	1	1	1	0.818931
EpI_N_165	HLA-I	N	311	319	ASAFFGMSR	9	Yes	NA	NA	NA	ASAFFGMSR, SASAFFGMSR	4307, 56979	HLA-A*03:01,HLA-A*11:01,HLA-A*31:01,HLA-A*68:01,HLA-A*33:01	HLA-A*03:01, HLA-A*11:01, HLA-A*31:01, HLA-A*68:01	3	0	2	3	2	2	1	1	1	1.23975
EpI_N_166	HLA-I	N	312	319	SAFFGMSR	8	Yes	NA	NA	NA	ASAFFGMSR, SASAFFGMSR	4307, 56979	HLA-A*03:01,HLA-A*11:01,HLA-A*31:01,HLA-A*68:01,HLA-A*33:01	HLA-A*31:01, HLA-A*68:01	1	0	0	2	1	1	1	1	1	0.715756
EpI_N_167	HLA-I	N	312	320	SAFFGMSRI	9	No	NA	NA	NA	NA	NA	NA	HLA-A*68:02, HLA-B*15:04, HLA-B*35:12, HLA-B*51:04, HLA-B*52:01, HLA-C*01:02, HLA-C*03:04, HLA-C*06:02, HLA-C*07:01, HLA-C*15:03, HLA-C*16:01	2	0	4	2	5	0	2	1	6	1.36018
EpI_N_168	HLA-I	N	315	324	FGMSRIGMEV	10	Yes	GMSRIGMEV	21347	HLA-A*02:01, cytotoxicity, IFNg release	GMSRIGMEV	21347	HLA-A*02:01, cytotoxicity, IFNg release	HLA-A*02:22	0	0	0	0	0	0	0	0	1	0.047619
EpI_N_169	HLA-I	N	316	324	GMSRIGMEV	9	Yes	GMSRIGMEV	21347	HLA-A*02:01, cytotoxicity, IFNg release	GMSRIGMEV	21347	HLA-A*02:01, cytotoxicity, IFNg release	HLA-A*02:01, HLA-A*02:04, HLA-A*02:11, HLA-A*02:17, HLA-A*02:22, HLA-B*15:04	1	0	1	1	1	1	2	2	4	1.08352
EpI_N_170	HLA-I	N	321	330	GMEVTPSGTW	10	Yes	IGMEVTPSGTWLTYH	26273	HLA-B*40:01, qualitative binding, IFNg release	IGMEVTPSGTWLTYH, GMEVTPSGTWL	26273, 193464	HLA-B*40:01, IFN release, qualitative binding	HLA-B*40:03	0	0	0	0	0	0	1	0	0	0.125
EpI_N_171	HLA-I	N	322	331	MEVTPSGTWL	10	Yes	IGMEVTPSGTWLTYH, MEVTPSGTWL	26273, 190494	HLA-B*40:01, qualitative binding, IFNg release	IGMEVTPSGTWLTYH, MEVTPSGTWL, GMEVTPSGTWL	26273, 190494, 193464	HLA-B*40:01, IFN release, qualitative binding	HLA-B*39:05, HLA-B*40:02, HLA-B*40:03, HLA-B*40:04, HLA-B*44:03	1	0	1	0	2	1	2	0	3	0.813679
EpI_N_172	HLA-I	N	322	330	MEVTPSGTW	9	Yes	IGMEVTPSGTWLTYH, MEVTPSGTWL	26273, 190494	HLA-B*40:01, qualitative binding, IFNg release	IGMEVTPSGTWLTYH, MEVTPSGTWL, GMEVTPSGTWL	26273, 190494, 193464	HLA-B*40:01, IFN release, qualitative binding	HLA-B*40:03, HLA-B*40:04, HLA-B*44:03, HLA-B*52:01	1	0	1	0	1	0	2	0	2	0.507236
EpI_N_173	HLA-I	N	323	333	EVTPSGTWLTY	11	Yes	IGMEVTPSGTWLTYH	26273	HLA-B*40:01, qualitative binding, IFNg release	IGMEVTPSGTWLTYH, TPSGTWLTY, VTPSGTWLTY	26273, 65763, 71461	HLA-B*40:01, IFN release, HLA-A*11:01, HLA-A*29:02, HLA-A*01:01, HLA-A*26;01, HLA-A*30:02	HLA-A*29:02, HLA-B*35:01, HLA-B*35:05, HLA-B*35:11, HLA-B*35:43	1	0	1	2	1	0	2	1	1	0.688375
EpI_N_174	HLA-I	N	323	331	EVTPSGTWL	9	Yes	IGMEVTPSGTWLTYH, MEVTPSGTWL	26273, 190494	HLA-B*40:01, qualitative binding, IFNg release	IGMEVTPSGTWLTYH, MEVTPSGTWL, GMEVTPSGTWL	26273, 190494, 193464	HLA-B*40:01, IFN release, qualitative binding	HLA-A*68:02, HLA-B*35:12, HLA-B*35:43, HLA-B*51:04	0	0	0	0	1	0	1	0	3	0.326681
EpI_N_175	HLA-I	N	324	333	VTPSGTWLTY	10	Yes	IGMEVTPSGTWLTYH	26273	HLA-B*40:01, qualitative binding, IFNg release	IGMEVTPSGTWLTYH, TPSGTWLTY, VTPSGTWLTY	26273, 65763, 71461	HLA-B*40:01, IFN release, HLA-A*11:01, HLA-A*29:02, HLA-A*01:01, HLA-A*26;01, HLA-A*30:02	HLA-A*01:01, HLA-A*11:01, HLA-A*29:02, HLA-B*15:01, HLA-B*15:04, HLA-B*35:05, HLA-B*35:11, HLA-B*35:43	2	0	2	2	2	0	3	0	2	0.911881
EpI_N_176	HLA-I	N	325	333	TPSGTWLTY	9	Yes	IGMEVTPSGTWLTYH	26273	HLA-B*40:01, qualitative binding, IFNg release	IGMEVTPSGTWLTYH, TPSGTWLTY, VTPSGTWLTY	26273, 65763, 71461	HLA-B*40:01, IFN release, HLA-A*11:01, HLA-A*29:02, HLA-A*01:01, HLA-A*26;01, HLA-A*30:02	HLA-A*29:02, HLA-B*35:01, HLA-B*35:05, HLA-B*35:11, HLA-B*35:12, HLA-B*35:43, HLA-B*51:04	1	0	1	2	1	0	3	1	2	0.860994
EpI_N_177	HLA-I	N	325	334	TPSGTWLTYT	10	Yes	NA	NA	NA	TPSGTWLTY	65763	HLA-A*11:01, HLA-A*29:02	HLA-B*35:05, HLA-B*35:11, HLA-B*35:43	0	0	0	0	1	0	2	0	1	0.356443
EpI_N_178	HLA-I	N	326	333	PSGTWLTY	8	Yes	IGMEVTPSGTWLTYH	26273	HLA-B*40:01, qualitative binding, IFNg release	IGMEVTPSGTWLTYH, TPSGTWLTY, VTPSGTWLTY, PSGTWLTYH	26273, 65763, 71461, 193521	HLA-B*40:01, IFN release, HLA-A*11:01, HLA-A*29:02, HLA-A*01:01, HLA-A*26;01, HLA-A*30:02, HLA-A*40:01	HLA-B*35:05, HLA-B*35:11	0	0	0	0	0	0	2	0	0	0.25
EpI_N_179	HLA-I	N	328	338	GTWLTYTGAIK	11	No	NA	NA	NA	NA	NA	NA	HLA-A*11:01	1	0	1	0	0	0	0	0	0	0.103175
EpI_N_180	HLA-I	N	329	337	TWLTYTGAI	9	No	NA	NA	NA	NA	NA	NA	HLA-A*23:01, HLA-A*24:02	1	0	2	1	1	1	0	1	1	0.627171
EpI_N_181	HLA-I	N	329	339	TWLTYTGAIKL	11	No	NA	NA	NA	NA	NA	NA	HLA-A*24:02	1	0	1	1	1	1	0	1	1	0.579552
EpI_N_182	HLA-I	N	330	339	WLTYTGAIKL	10	No	NA	NA	NA	NA	NA	NA	HLA-A*02:04, HLA-A*02:22, HLA-C*15:03	0	0	0	0	0	0	0	0	3	0.142857
EpI_N_183	HLA-I	N	331	339	LTYTGAIKL	9	No	NA	NA	NA	NA	NA	NA	HLA-A*02:04, HLA-A*68:02, HLA-B*15:04, HLA-B*35:05, HLA-B*35:11, HLA-B*35:12, HLA-B*35:43, HLA-B*51:04, HLA-B*52:01, HLA-C*01:02, HLA-C*03:04, HLA-C*04:01, HLA-C*06:02, HLA-C*07:01, HLA-C*15:02, HLA-C*15:03, HLA-C*16:01	3	0	6	3	7	0	4	2	9	2.19141
EpI_N_184	HLA-I	N	331	338	LTYTGAIK	8	No	NA	NA	NA	NA	NA	NA	HLA-A*03:01, HLA-A*11:01	2	0	2	1	1	1	0	0	0	0.523996
EpI_N_185	HLA-I	N	332	339	TYTGAIKL	8	No	NA	NA	NA	NA	NA	NA	HLA-A*24:02	1	0	1	1	1	1	0	1	1	0.579552
EpI_N_186	HLA-I	N	338	346	KLDDKDPNF	9	No	NA	NA	NA	NA	NA	NA	HLA-A*02:04, HLA-A*02:22, HLA-B*15:04, HLA-C*01:02, HLA-C*03:04, HLA-C*07:01, HLA-C*15:03, HLA-C*16:01	1	0	3	1	4	0	1	1	5	0.966737
EpI_N_187	HLA-I	N	338	347	KLDDKDPNFK	10	No	NA	NA	NA	NA	NA	NA	HLA-A*03:01, HLA-A*11:01	2	0	2	1	1	1	0	0	0	0.523996
EpI_N_188	HLA-I	N	343	351	DPNFKDQVI	9	No	NA	NA	NA	NA	NA	NA	HLA-B*35:12, HLA-B*51:04	0	0	0	0	0	0	1	0	1	0.172619
EpI_N_189	HLA-I	N	343	352	DPNFKDQVIL	10	No	NA	NA	NA	NA	NA	NA	HLA-B*35:12, HLA-B*51:04	0	0	0	0	0	0	1	0	1	0.172619
EpI_N_190	HLA-I	N	343	353	DPNFKDQVILL	11	No	NA	NA	NA	NA	NA	NA	HLA-B*35:12, HLA-B*51:04	0	0	0	0	0	0	1	0	1	0.172619
EpI_N_191	HLA-I	N	345	353	NFKDQVILL	9	No	NA	NA	NA	NA	NA	NA	HLA-C*06:02, HLA-C*07:01, HLA-C*07:02	3	0	3	3	3	0	0	1	1	0.821195
EpI_N_192	HLA-I	N	346	353	FKDQVILL	8	No	NA	NA	NA	NA	NA	NA	HLA-B*39:05, HLA-B*39:09	0	0	0	1	0	0	0	0	2	0.154062
EpI_N_193	HLA-I	N	349	357	QVILLNKHI	9	No	NA	NA	NA	NA	NA	NA	HLA-A*68:02, HLA-B*52:01	0	0	0	0	0	0	0	0	2	0.0952381
EpI_N_194	HLA-I	N	351	359	ILLNKHIDA	9	Yes	ILLNKHIDA, ILLNKHID	27182, 125100	HLA-A*02:01, IFNg release	ILLNKHIDA, ILLNKHID	27182, 125100	HLA-A*02:01, IFNg release	HLA-A*02:04	0	0	0	0	0	0	0	0	1	0.047619
EpI_N_195	HLA-I	N	351	361	ILLNKHIDAYK	11	Yes	ILLNKHIDA, ILLNKHID	27182, 125100	HLA-A*02:01, IFNg release	ILLNKHIDA, ILLNKHID	27182, 125100	HLA-A*02:01, IFNg release	HLA-A*03:01	1	0	1	1	1	1	0	0	0	0.420822
EpI_N_196	HLA-I	N	351	360	ILLNKHIDAY	10	Yes	ILLNKHIDA, ILLNKHID	27182, 125100	HLA-A*02:01, IFNg release	ILLNKHIDA, ILLNKHID	27182, 125100	HLA-A*02:01, IFNg release	HLA-B*15:01, HLA-B*15:04	0	0	0	0	0	0	1	0	1	0.172619
EpI_N_197	HLA-I	N	352	361	LLNKHIDAYK	10	Yes	LLNKHIDAYKTFPPTEPK	37611	cytotoxicity, IFNg release	NA	NA	NA	HLA-A*03:01, HLA-A*11:01	2	0	2	1	1	1	0	0	0	0.523996
EpI_N_198	HLA-I	N	352	360	LLNKHIDAY	9	Yes	LLNKHIDAYKTFPPTEPK	37611	cytotoxicity, IFNg release	NA	NA	NA	HLA-B*15:01, HLA-B*15:04, HLA-B*35:05, HLA-B*35:11, HLA-B*35:43	0	0	0	0	1	0	3	0	2	0.529062
EpI_N_199	HLA-I	N	353	361	LNKHIDAYK	9	Yes	LLNKHIDAYKTFPPTEPK	37611	cytotoxicity, IFNg release	NA	NA	NA	HLA-A*68:01	0	0	0	1	1	1	0	0	0	0.317647
EpI_N_200	HLA-I	N	354	363	NKHIDAYKTF	10	Yes	LLNKHIDAYKTFPPTEPK	37611	cytotoxicity, IFNg release	NA	NA	NA	HLA-B*39:05, HLA-B*39:09	0	0	0	1	0	0	0	0	2	0.154062
EpI_N_201	HLA-I	N	355	363	KHIDAYKTF	9	Yes	LLNKHIDAYKTFPPTEPK	37611	cytotoxicity, IFNg release	NA	NA	NA	HLA-A*23:01, HLA-A*24:02, HLA-B*15:04, HLA-B*39:05, HLA-B*39:09, HLA-B*40:03, HLA-B*52:01, HLA-C*06:02, HLA-C*07:01	3	0	4	4	3	1	2	1	4	1.52049
EpI_N_202	HLA-I	N	361	369	KTFPPTEPK	9	Yes	LLNKHIDAYKTFPPTEPK	37611	cytotoxicity, IFNg release	KTFPPTEPK, KTFPPTEPKK	33667, 33668	HLA-A*11:01, HLA-A*03:01, HLA-A*31:01, HLA-A*68:01	HLA-A*03:01, HLA-A*11:01, HLA-A*31:01, HLA-A*68:01	3	0	2	3	2	2	1	1	1	1.23975
EpI_N_203	HLA-I	N	361	370	KTFPPTEPKK	10	Yes	NA	NA	NA	KTFPPTEPK, KTFPPTEPKK	33667, 33668	HLA-A*11:01, HLA-A*03:01, HLA-A*31:01, HLA-A*68:01	HLA-A*03:01, HLA-A*11:01, HLA-A*68:01	2	0	2	2	2	2	0	0	0	0.841643
EpI_N_204	HLA-I	N	374	382	KKADETQAL	9	No	NA	NA	NA	NA	NA	NA	HLA-B*39:05, HLA-B*39:09, HLA-C*06:02, HLA-C*07:01	2	0	2	3	2	0	0	0	2	0.595705
EpI_N_205	HLA-I	N	375	382	KADETQAL	8	No	NA	NA	NA	NA	NA	NA	HLA-B*35:12, HLA-C*01:02, HLA-C*03:03, HLA-C*03:04, HLA-C*05:01, HLA-C*08:02, HLA-C*15:02, HLA-C*15:03, HLA-C*16:01	1	0	6	1	4	0	0	1	4	0.936975
EpI_N_206	HLA-I	N	378	387	ETQALPQRQK	10	No	NA	NA	NA	NA	NA	NA	HLA-A*68:01	0	0	0	1	1	1	0	0	0	0.317647
EpI_N_207	HLA-I	N	380	388	QALPQRQKK	9	No	NA	NA	NA	NA	NA	NA	HLA-A*68:01	0	0	0	1	1	1	0	0	0	0.317647
EpI_N_208	HLA-I	N	384	392	QRQKKQQTV	9	No	NA	NA	NA	NA	NA	NA	HLA-B*39:09, HLA-C*07:01	1	0	1	2	1	0	0	0	1	0.327264
EpI_N_209	HLA-I	N	385	394	RQKKQQTVTL	10	No	NA	NA	NA	NA	NA	NA	HLA-B*15:01, HLA-B*15:04	0	0	0	0	0	0	1	0	1	0.172619
EpI_N_210	HLA-I	N	385	393	RQKKQQTVT	9	No	NA	NA	NA	NA	NA	NA	HLA-B*15:04	0	0	0	0	0	0	1	0	0	0.125
EpI_N_211	HLA-I	N	386	394	QKKQQTVTL	9	No	NA	NA	NA	NA	NA	NA	HLA-B*39:05, HLA-B*39:09, HLA-C*06:02, HLA-C*07:01	2	0	2	3	2	0	0	0	2	0.595705
EpI_N_212	HLA-I	N	387	395	KKQQTVTLL	9	No	NA	NA	NA	NA	NA	NA	HLA-B*39:05, HLA-B*39:09, HLA-C*06:02, HLA-C*07:01	2	0	2	3	2	0	0	0	2	0.595705
EpI_N_213	HLA-I	N	388	395	KQQTVTLL	8	No	NA	NA	NA	NA	NA	NA	HLA-B*52:01	0	0	0	0	0	0	0	0	1	0.047619
EpI_N_214	HLA-I	N	390	398	QTVTLLPAA	9	No	NA	NA	NA	NA	NA	NA	HLA-A*68:02	0	0	0	0	0	0	0	0	1	0.047619
EpI_N_215	HLA-I	N	392	400	VTLLPAADL	9	No	NA	NA	NA	NA	NA	NA	HLA-C*01:02, HLA-C*03:04, HLA-C*15:03, HLA-C*16:01	0	0	2	0	3	0	0	1	3	0.525677
EpI_N_216	HLA-I	N	394	403	LLPAADLDDF	10	No	NA	NA	NA	NA	NA	NA	HLA-B*35:05	0	0	0	0	0	0	1	0	0	0.125
EpI_N_217	HLA-I	N	395	403	LPAADLDDF	9	No	NA	NA	NA	NA	NA	NA	HLA-B*35:01, HLA-B*35:05, HLA-B*35:11, HLA-B*35:12, HLA-B*35:43, HLA-B*51:04	1	0	1	1	1	0	3	1	2	0.802171
EpI_N_218	HLA-I	N	397	405	AADLDDFSK	9	No	NA	NA	NA	NA	NA	NA	HLA-A*11:01	1	0	1	0	0	0	0	0	0	0.103175
EpI_N_219	HLA-I	N	398	407	ADLDDFSKQL	10	No	NA	NA	NA	NA	NA	NA	HLA-A*02:04, HLA-A*02:22, HLA-B*40:04	0	0	0	0	0	0	1	0	3	0.267857
EpI_N_220	HLA-I	N	399	407	DLDDFSKQL	9	No	NA	NA	NA	NA	NA	NA	HLA-B*35:12, HLA-B*39:09, HLA-B*51:04, HLA-C*01:02, HLA-C*04:01, HLA-C*05:01, HLA-C*15:02, HLA-C*15:03	2	0	3	3	3	0	1	1	5	1.08112
EpI_N_221	HLA-I	N	403	411	FSKQLQQSM	9	No	NA	NA	NA	NA	NA	NA	HLA-B*08:01, HLA-B*15:01, HLA-B*15:04, HLA-B*35:05, HLA-B*35:11, HLA-B*35:12, HLA-B*35:43, HLA-C*01:02, HLA-C*03:04, HLA-C*06:02, HLA-C*07:01, HLA-C*12:03, HLA-C*15:02, HLA-C*15:03, HLA-C*16:01	4	0	6	2	6	0	3	1	6	1.75035
EpI_N_222	HLA-I	N	405	413	KQLQQSMSS	9	No	NA	NA	NA	NA	NA	NA	HLA-B*15:04	0	0	0	0	0	0	1	0	0	0.125
EpI_NSP1_1	HLA-I	NSP1	1	8	MESLVPGF	8	No	NA	NA	NA	NA	NA	NA	HLA-B*18:01, HLA-B*40:02, HLA-B*40:03, HLA-B*40:04, HLA-B*44:03	2	0	1	1	2	1	2	0	2	0.880439
EpI_NSP1_2	HLA-I	NSP1	2	11	ESLVPGFNEK	10	No	NA	NA	NA	NA	NA	NA	HLA-A*11:01, HLA-A*68:01	1	0	1	1	1	1	0	0	0	0.420822
EpI_NSP1_3	HLA-I	NSP1	3	11	SLVPGFNEK	9	No	NA	NA	NA	NA	NA	NA	HLA-A*03:01, HLA-A*11:01, HLA-A*68:01	2	0	2	2	2	2	0	0	0	0.841643
EpI_NSP1_4	HLA-I	NSP1	5	14	VPGFNEKTHV	10	No	NA	NA	NA	NA	NA	NA	HLA-B*51:04	0	0	0	0	0	0	1	0	0	0.125
EpI_NSP1_5	HLA-I	NSP1	8	16	FNEKTHVQL	9	No	NA	NA	NA	NA	NA	NA	HLA-B*39:05, HLA-B*39:09	0	0	0	1	0	0	0	0	2	0.154062
EpI_NSP1_6	HLA-I	NSP1	9	16	NEKTHVQL	8	Yes	NA	NA	NA	NEKTHVQLSL	43660	HLA-B*40:02	HLA-B*18:01, HLA-B*40:02, HLA-B*40:04	1	0	0	1	1	1	1	0	2	0.593441
EpI_NSP1_7	HLA-I	NSP1	9	18	NEKTHVQLSL	10	Yes	NA	NA	NA	NEKTHVQLSL	43660	HLA-B*40:02	HLA-B*40:03, HLA-B*40:04	0	0	0	0	0	0	2	0	1	0.297619
EpI_NSP1_8	HLA-I	NSP1	10	18	EKTHVQLSL	9	Yes	NA	NA	NA	NEKTHVQLSL	43660	HLA-B*40:02	HLA-B*39:05, HLA-B*39:09	0	0	0	1	0	0	0	0	2	0.154062
EpI_NSP1_9	HLA-I	NSP1	11	18	KTHVQLSL	8	Yes	NA	NA	NA	NEKTHVQLSL	43660	HLA-B*40:02	HLA-C*15:03, HLA-C*16:01	0	0	1	0	1	0	0	0	1	0.154062
EpI_NSP1_10	HLA-I	NSP1	12	20	THVQLSLPV	9	No	NA	NA	NA	NA	NA	NA	HLA-B*39:05, HLA-B*39:09	0	0	0	1	0	0	0	0	2	0.154062
EpI_NSP1_11	HLA-I	NSP1	12	21	THVQLSLPVL	10	No	NA	NA	NA	NA	NA	NA	HLA-B*39:05, HLA-B*39:09	0	0	0	1	0	0	0	0	2	0.154062
EpI_NSP1_12	HLA-I	NSP1	13	21	HVQLSLPVL	9	No	NA	NA	NA	NA	NA	NA	HLA-B*35:12, HLA-B*39:09, HLA-B*51:04, HLA-C*01:02, HLA-C*03:04, HLA-C*15:03, HLA-C*16:01	0	0	2	1	3	0	1	1	5	0.804739
EpI_NSP1_13	HLA-I	NSP1	14	23	VQLSLPVLQV	10	No	NA	NA	NA	NA	NA	NA	HLA-A*02:01, HLA-A*02:11, HLA-B*52:01	1	0	1	1	1	1	1	2	2	0.863282
EpI_NSP1_14	HLA-I	NSP1	14	21	VQLSLPVL	8	No	NA	NA	NA	NA	NA	NA	HLA-B*39:05, HLA-B*52:01	0	0	0	0	0	0	0	0	2	0.0952381
EpI_NSP1_15	HLA-I	NSP1	15	23	QLSLPVLQV	9	No	NA	NA	NA	NA	NA	NA	HLA-A*02:04, HLA-A*02:22, HLA-C*15:03	0	0	0	0	0	0	0	0	3	0.142857
EpI_NSP1_16	HLA-I	NSP1	15	24	QLSLPVLQVR	10	No	NA	NA	NA	NA	NA	NA	HLA-A*68:01	0	0	0	1	1	1	0	0	0	0.317647
EpI_NSP1_17	HLA-I	NSP1	16	24	LSLPVLQVR	9	No	NA	NA	NA	NA	NA	NA	HLA-A*31:01, HLA-A*68:01	1	0	0	2	1	1	1	1	1	0.715756
EpI_NSP1_18	HLA-I	NSP1	18	27	LPVLQVRDVL	10	No	NA	NA	NA	NA	NA	NA	HLA-B*07:02, HLA-B*35:05, HLA-B*35:12, HLA-B*51:04	1	0	1	1	0	0	2	0	1	0.459617
EpI_NSP1_19	HLA-I	NSP1	18	26	LPVLQVRDV	9	No	NA	NA	NA	NA	NA	NA	HLA-B*35:12, HLA-B*51:04	0	0	0	0	0	0	1	0	1	0.172619
EpI_NSP1_20	HLA-I	NSP1	20	28	VLQVRDVLV	9	No	NA	NA	NA	NA	NA	NA	HLA-A*02:01, HLA-A*02:04, HLA-A*02:11, HLA-A*02:22	1	0	1	1	1	1	1	2	3	0.910901
EpI_NSP1_21	HLA-I	NSP1	22	31	QVRDVLVRGF	10	No	NA	NA	NA	NA	NA	NA	HLA-B*15:01	0	0	0	0	0	0	0	0	1	0.047619
EpI_NSP1_22	HLA-I	NSP1	23	31	VRDVLVRGF	9	No	NA	NA	NA	NA	NA	NA	HLA-B*39:05, HLA-B*39:09, HLA-B*40:03, HLA-C*07:01	1	0	1	2	1	0	1	0	2	0.499883
EpI_NSP1_23	HLA-I	NSP1	24	31	RDVLVRGF	8	No	NA	NA	NA	NA	NA	NA	HLA-B*40:03	0	0	0	0	0	0	1	0	0	0.125
EpI_NSP1_24	HLA-I	NSP1	26	35	VLVRGFGDSV	10	No	NA	NA	NA	NA	NA	NA	HLA-A*02:01, HLA-A*02:04, HLA-A*02:11, HLA-A*02:22	1	0	1	1	1	1	1	2	3	0.910901
EpI_NSP1_25	HLA-I	NSP1	27	35	LVRGFGDSV	9	No	NA	NA	NA	NA	NA	NA	HLA-A*68:02, HLA-B*15:04, HLA-C*03:04, HLA-C*15:03, HLA-C*16:01	0	0	2	0	2	0	1	1	3	0.591853
EpI_NSP1_26	HLA-I	NSP1	31	39	FGDSVEEVL	9	No	NA	NA	NA	NA	NA	NA	HLA-B*35:12, HLA-B*39:05, HLA-B*39:09, HLA-C*01:02, HLA-C*03:04, HLA-C*04:01, HLA-C*05:01, HLA-C*08:02, HLA-C*15:02, HLA-C*15:03	2	0	5	3	4	0	0	2	7	1.31653
EpI_NSP1_27	HLA-I	NSP1	34	42	SVEEVLSEA	9	No	NA	NA	NA	NA	NA	NA	HLA-A*02:22	0	0	0	0	0	0	0	0	1	0.047619
EpI_NSP1_28	HLA-I	NSP1	34	43	SVEEVLSEAR	10	No	NA	NA	NA	NA	NA	NA	HLA-A*68:01	0	0	0	1	1	1	0	0	0	0.317647
EpI_NSP1_29	HLA-I	NSP1	37	47	EVLSEARQHLK	11	No	NA	NA	NA	NA	NA	NA	HLA-A*68:01	0	0	0	1	1	1	0	0	0	0.317647
EpI_NSP1_30	HLA-I	NSP1	37	46	EVLSEARQHL	10	No	NA	NA	NA	NA	NA	NA	HLA-A*68:02	0	0	0	0	0	0	0	0	1	0.047619
EpI_NSP1_31	HLA-I	NSP1	38	46	VLSEARQHL	9	No	NA	NA	NA	NA	NA	NA	HLA-A*02:01, HLA-A*02:04, HLA-A*02:11, HLA-A*02:22, HLA-B*15:04, HLA-C*01:02, HLA-C*03:04, HLA-C*07:01, HLA-C*15:03, HLA-C*16:01	2	0	4	2	5	1	2	3	6	1.7824
EpI_NSP1_32	HLA-I	NSP1	38	47	VLSEARQHLK	10	No	NA	NA	NA	NA	NA	NA	HLA-A*03:01, HLA-A*11:01	2	0	2	1	1	1	0	0	0	0.523996
EpI_NSP1_33	HLA-I	NSP1	39	47	LSEARQHLK	9	No	NA	NA	NA	NA	NA	NA	HLA-A*11:01	1	0	1	0	0	0	0	0	0	0.103175
EpI_NSP1_34	HLA-I	NSP1	44	53	QHLKDGTCGL	10	No	NA	NA	NA	NA	NA	NA	HLA-B*39:05, HLA-B*39:09	0	0	0	1	0	0	0	0	2	0.154062
EpI_NSP1_35	HLA-I	NSP1	45	53	HLKDGTCGL	9	No	NA	NA	NA	NA	NA	NA	HLA-A*02:04, HLA-A*02:11, HLA-A*02:22, HLA-B*15:01, HLA-B*15:04, HLA-C*01:02, HLA-C*03:04, HLA-C*16:01	0	0	2	0	3	0	2	2	5	0.982026
EpI_NSP1_36	HLA-I	NSP1	45	54	HLKDGTCGLV	10	No	NA	NA	NA	NA	NA	NA	HLA-A*02:22	0	0	0	0	0	0	0	0	1	0.047619
EpI_NSP1_37	HLA-I	NSP1	49	58	GTCGLVEVEK	10	No	NA	NA	NA	NA	NA	NA	HLA-A*03:01, HLA-A*11:01	2	0	2	1	1	1	0	0	0	0.523996
EpI_NSP1_38	HLA-I	NSP1	52	60	GLVEVEKGV	9	No	NA	NA	NA	NA	NA	NA	HLA-A*02:01, HLA-A*02:04, HLA-A*02:11, HLA-A*02:22	1	0	1	1	1	1	1	2	3	0.910901
EpI_NSP1_39	HLA-I	NSP1	52	61	GLVEVEKGVL	10	No	NA	NA	NA	NA	NA	NA	HLA-A*02:22	0	0	0	0	0	0	0	0	1	0.047619
EpI_NSP1_40	HLA-I	NSP1	54	61	VEVEKGVL	8	No	NA	NA	NA	NA	NA	NA	HLA-B*18:01, HLA-B*39:05, HLA-B*40:02, HLA-B*40:03, HLA-B*40:04	1	0	0	1	1	1	2	0	3	0.76606
EpI_NSP1_41	HLA-I	NSP1	54	64	VEVEKGVLPQL	11	No	NA	NA	NA	NA	NA	NA	HLA-B*40:02, HLA-B*40:03, HLA-B*40:04	0	0	0	0	1	1	2	0	2	0.604062
EpI_NSP1_42	HLA-I	NSP1	54	62	VEVEKGVLP	9	No	NA	NA	NA	NA	NA	NA	HLA-B*40:04	0	0	0	0	0	0	1	0	1	0.172619
EpI_NSP1_43	HLA-I	NSP1	55	64	EVEKGVLPQL	10	No	NA	NA	NA	NA	NA	NA	HLA-B*40:04	0	0	0	0	0	0	1	0	1	0.172619
EpI_NSP1_44	HLA-I	NSP1	56	64	VEKGVLPQL	9	No	NA	NA	NA	NA	NA	NA	HLA-B*15:04, HLA-B*39:05, HLA-B*39:09, HLA-B*40:02, HLA-B*40:03, HLA-B*40:04, HLA-B*52:01	0	0	0	1	1	1	3	0	5	0.930742
EpI_NSP1_45	HLA-I	NSP1	59	69	GVLPQLEQPYV	11	No	NA	NA	NA	NA	NA	NA	HLA-A*02:01, HLA-A*02:04	1	0	1	1	1	1	0	1	2	0.627171
EpI_NSP1_46	HLA-I	NSP1	59	68	GVLPQLEQPY	10	No	NA	NA	NA	NA	NA	NA	HLA-A*29:02, HLA-B*15:01	0	0	0	1	0	0	0	0	1	0.106443
EpI_NSP1_47	HLA-I	NSP1	60	69	VLPQLEQPYV	10	No	NA	NA	NA	NA	NA	NA	HLA-A*02:01, HLA-A*02:04, HLA-A*02:11, HLA-A*02:22	1	0	1	1	1	1	1	2	3	0.910901
EpI_NSP1_48	HLA-I	NSP1	60	70	VLPQLEQPYVF	11	No	NA	NA	NA	NA	NA	NA	HLA-A*24:02	1	0	1	1	1	1	0	1	1	0.579552
EpI_NSP1_49	HLA-I	NSP1	60	68	VLPQLEQPY	9	No	NA	NA	NA	NA	NA	NA	HLA-A*29:02, HLA-B*15:01, HLA-B*15:04, HLA-B*35:05, HLA-B*35:11, HLA-B*35:43	0	0	0	1	1	0	3	0	2	0.587885
EpI_NSP1_50	HLA-I	NSP1	61	68	LPQLEQPY	8	No	NA	NA	NA	NA	NA	NA	HLA-B*35:01, HLA-B*35:05, HLA-B*35:11, HLA-B*35:43	1	0	1	1	1	0	2	1	1	0.629552
EpI_NSP1_51	HLA-I	NSP1	61	70	LPQLEQPYVF	10	No	NA	NA	NA	NA	NA	NA	HLA-B*35:01, HLA-B*35:05, HLA-B*35:11, HLA-B*35:12, HLA-B*35:43, HLA-B*51:04	1	0	1	1	1	0	3	1	2	0.802171
EpI_NSP1_52	HLA-I	NSP1	61	69	LPQLEQPYV	9	No	NA	NA	NA	NA	NA	NA	HLA-B*35:05, HLA-B*35:12, HLA-B*51:01, HLA-B*51:04	1	0	1	1	1	0	2	1	1	0.629552
EpI_NSP1_53	HLA-I	NSP1	62	70	PQLEQPYVF	9	No	NA	NA	NA	NA	NA	NA	HLA-A*23:01, HLA-A*24:02, HLA-B*52:01	1	0	2	1	1	1	0	1	2	0.67479
EpI_NSP1_54	HLA-I	NSP1	63	72	QLEQPYVFIK	10	Yes	NA	NA	NA	QLEQPYVFIK	51326	HLA-A*11:01	HLA-A*11:01	1	0	1	0	0	0	0	0	0	0.103175
EpI_NSP1_55	HLA-I	NSP1	63	71	QLEQPYVFI	9	Yes	NA	NA	NA	QLEQPYVFIK	51326	HLA-A*11:01	HLA-C*04:01	1	0	1	1	1	0	0	1	1	0.379552
EpI_NSP1_56	HLA-I	NSP1	64	71	LEQPYVFI	8	Yes	NA	NA	NA	QLEQPYVFIK	51326	HLA-A*11:01	HLA-B*40:02, HLA-B*52:01	0	0	0	0	1	1	0	0	2	0.354062
EpI_NSP1_57	HLA-I	NSP1	64	72	LEQPYVFIK	9	Yes	NA	NA	NA	QLEQPYVFIK	51326	HLA-A*11:01	HLA-B*40:03	0	0	0	0	0	0	1	0	0	0.125
EpI_NSP1_58	HLA-I	NSP1	65	73	EQPYVFIKR	9	No	NA	NA	NA	NA	NA	NA	HLA-A*68:01	0	0	0	1	1	1	0	0	0	0.317647
EpI_NSP1_59	HLA-I	NSP1	68	77	YVFIKRSDAR	10	No	NA	NA	NA	NA	NA	NA	HLA-A*31:01, HLA-A*68:01	1	0	0	2	1	1	1	1	1	0.715756
EpI_NSP1_60	HLA-I	NSP1	69	77	VFIKRSDAR	9	No	NA	NA	NA	NA	NA	NA	HLA-A*31:01	1	0	0	1	0	0	1	1	1	0.398109
EpI_NSP1_61	HLA-I	NSP1	75	85	DARTAPHGHVM	11	No	NA	NA	NA	NA	NA	NA	HLA-B*35:11, HLA-B*35:12, HLA-B*35:43, HLA-B*51:04	0	0	0	0	1	0	2	0	2	0.404062
EpI_NSP1_62	HLA-I	NSP1	76	85	ARTAPHGHVM	10	No	NA	NA	NA	NA	NA	NA	HLA-B*15:04, HLA-B*35:43, HLA-B*39:05, HLA-B*39:09, HLA-C*03:04, HLA-C*07:01, HLA-C*15:03, HLA-C*16:01	1	0	3	2	4	0	1	1	5	1.02556
EpI_NSP1_63	HLA-I	NSP1	76	84	ARTAPHGHV	9	No	NA	NA	NA	NA	NA	NA	HLA-C*07:01	1	0	1	1	1	0	0	0	0	0.220822
EpI_NSP1_64	HLA-I	NSP1	77	86	RTAPHGHVMV	10	No	NA	NA	NA	NA	NA	NA	HLA-A*68:02, HLA-B*15:04, HLA-C*15:03	0	0	0	0	0	0	1	0	2	0.220238
EpI_NSP1_65	HLA-I	NSP1	77	85	RTAPHGHVM	9	No	NA	NA	NA	NA	NA	NA	HLA-B*07:02, HLA-B*15:01, HLA-B*15:04, HLA-B*35:05, HLA-B*35:11, HLA-B*35:12, HLA-B*35:43, HLA-B*39:05, HLA-B*39:09, HLA-B*51:04, HLA-B*52:01, HLA-C*01:02, HLA-C*03:04, HLA-C*04:01, HLA-C*06:02, HLA-C*07:01, HLA-C*07:02, HLA-C*12:03, HLA-C*15:02, HLA-C*15:03, HLA-C*16:01	6	0	8	6	8	0	4	3	11	2.89496
EpI_NSP1_66	HLA-I	NSP1	77	84	RTAPHGHV	8	No	NA	NA	NA	NA	NA	NA	HLA-C*15:03	0	0	0	0	0	0	0	0	1	0.047619
EpI_NSP1_67	HLA-I	NSP1	78	86	TAPHGHVMV	9	No	NA	NA	NA	NA	NA	NA	HLA-A*68:02, HLA-B*51:04, HLA-C*01:02, HLA-C*03:04	0	0	1	0	2	0	1	1	3	0.544234
EpI_NSP1_68	HLA-I	NSP1	78	85	TAPHGHVM	8	No	NA	NA	NA	NA	NA	NA	HLA-B*35:11, HLA-B*35:43, HLA-B*51:04	0	0	0	0	1	0	2	0	1	0.356443
EpI_NSP1_69	HLA-I	NSP1	79	86	APHGHVMV	8	No	NA	NA	NA	NA	NA	NA	HLA-B*07:02, HLA-B*51:04	1	0	1	1	0	0	1	0	0	0.286998
EpI_NSP1_70	HLA-I	NSP1	79	88	APHGHVMVEL	10	No	NA	NA	NA	NA	NA	NA	HLA-B*07:02, HLA-B*35:05, HLA-B*35:11, HLA-B*35:12, HLA-B*35:43, HLA-B*39:05, HLA-B*39:09, HLA-B*51:04	1	0	1	2	1	0	3	0	4	0.845121
EpI_NSP1_71	HLA-I	NSP1	79	87	APHGHVMVE	9	No	NA	NA	NA	NA	NA	NA	HLA-B*35:11	0	0	0	0	0	0	1	0	0	0.125
EpI_NSP1_72	HLA-I	NSP1	80	88	PHGHVMVEL	9	No	NA	NA	NA	NA	NA	NA	HLA-B*39:05, HLA-B*39:09	0	0	0	1	0	0	0	0	2	0.154062
EpI_NSP1_73	HLA-I	NSP1	82	90	GHVMVELVA	9	No	NA	NA	NA	NA	NA	NA	HLA-B*39:05	0	0	0	0	0	0	0	0	1	0.047619
EpI_NSP1_74	HLA-I	NSP1	83	92	HVMVELVAEL	10	No	NA	NA	NA	NA	NA	NA	HLA-A*02:04, HLA-A*02:22, HLA-A*68:02	0	0	0	0	0	0	0	0	3	0.142857
EpI_NSP1_75	HLA-I	NSP1	84	92	VMVELVAEL	9	No	NA	NA	NA	NA	NA	NA	HLA-A*02:01, HLA-A*02:04, HLA-A*02:11, HLA-A*02:17, HLA-A*02:22, HLA-B*15:01, HLA-B*15:04, HLA-B*35:12, HLA-B*39:05, HLA-B*39:09, HLA-B*52:01, HLA-C*01:02, HLA-C*03:04, HLA-C*15:03, HLA-C*16:01	1	0	3	2	4	1	2	3	12	1.90612
EpI_NSP1_76	HLA-I	NSP1	86	95	VELVAELEGI	10	No	NA	NA	NA	NA	NA	NA	HLA-B*40:04	0	0	0	0	0	0	1	0	1	0.172619
EpI_NSP1_77	HLA-I	NSP1	87	95	ELVAELEGI	9	No	NA	NA	NA	NA	NA	NA	HLA-A*02:22, HLA-A*68:02	0	0	0	0	0	0	0	0	2	0.0952381
EpI_NSP1_78	HLA-I	NSP1	88	97	LVAELEGIQY	10	No	NA	NA	NA	NA	NA	NA	HLA-A*29:02, HLA-B*15:01, HLA-B*15:04, HLA-B*35:01, HLA-B*35:05, HLA-B*35:11, HLA-B*35:43	1	0	1	2	1	0	3	1	2	0.860994
EpI_NSP1_79	HLA-I	NSP1	89	97	VAELEGIQY	9	No	NA	NA	NA	NA	NA	NA	HLA-A*01:01, HLA-B*15:04, HLA-B*35:01, HLA-B*35:05, HLA-B*35:11, HLA-B*35:43	2	0	2	2	2	0	3	1	1	0.975373
EpI_NSP1_80	HLA-I	NSP1	90	99	AELEGIQYGR	10	No	NA	NA	NA	NA	NA	NA	HLA-A*31:01, HLA-B*40:03	1	0	0	1	0	0	2	1	1	0.523109
EpI_NSP1_81	HLA-I	NSP1	90	97	AELEGIQY	8	No	NA	NA	NA	NA	NA	NA	HLA-B*18:01, HLA-B*40:03, HLA-B*40:04, HLA-B*44:03	2	0	1	1	1	0	2	0	1	0.573996
EpI_NSP1_82	HLA-I	NSP1	90	98	AELEGIQYG	9	No	NA	NA	NA	NA	NA	NA	HLA-B*40:03, HLA-B*40:04, HLA-B*44:03	1	0	1	0	1	0	2	0	1	0.459617
EpI_NSP1_83	HLA-I	NSP1	91	99	ELEGIQYGR	9	No	NA	NA	NA	NA	NA	NA	HLA-A*68:01	0	0	0	1	1	1	0	0	0	0.317647
EpI_NSP1_84	HLA-I	NSP1	95	104	IQYGRSGETL	10	No	NA	NA	NA	NA	NA	NA	HLA-B*15:01, HLA-B*15:04, HLA-B*39:05, HLA-B*39:09, HLA-B*52:01	0	0	0	1	0	0	1	0	4	0.3743
EpI_NSP1_85	HLA-I	NSP1	96	104	QYGRSGETL	9	No	NA	NA	NA	NA	NA	NA	HLA-A*24:02	1	0	1	1	1	1	0	1	1	0.579552
EpI_NSP1_86	HLA-I	NSP1	97	106	YGRSGETLGV	10	No	NA	NA	NA	NA	NA	NA	HLA-C*07:01	1	0	1	1	1	0	0	0	0	0.220822
EpI_NSP1_87	HLA-I	NSP1	98	106	GRSGETLGV	9	No	NA	NA	NA	NA	NA	NA	HLA-B*39:05, HLA-B*39:09, HLA-C*07:01	1	0	1	2	1	0	0	0	2	0.374883
EpI_NSP1_88	HLA-I	NSP1	98	107	GRSGETLGVL	10	No	NA	NA	NA	NA	NA	NA	HLA-B*39:05, HLA-B*39:09, HLA-C*07:01	1	0	1	2	1	0	0	0	2	0.374883
EpI_NSP1_89	HLA-I	NSP1	99	107	RSGETLGVL	9	No	NA	NA	NA	NA	NA	NA	HLA-C*01:02, HLA-C*03:04, HLA-C*15:02, HLA-C*15:03, HLA-C*16:01	0	0	3	0	3	0	0	1	3	0.573296
EpI_NSP1_90	HLA-I	NSP1	101	108	GETLGVLV	8	No	NA	NA	NA	NA	NA	NA	HLA-B*40:02, HLA-B*40:04	0	0	0	0	1	1	1	0	2	0.479062
EpI_NSP1_91	HLA-I	NSP1	101	109	GETLGVLVP	9	No	NA	NA	NA	NA	NA	NA	HLA-B*40:02, HLA-B*40:03, HLA-B*40:04	0	0	0	0	1	1	2	0	2	0.604062
EpI_NSP1_92	HLA-I	NSP1	101	110	GETLGVLVPH	10	No	NA	NA	NA	NA	NA	NA	HLA-B*40:03	0	0	0	0	0	0	1	0	0	0.125
EpI_NSP1_93	HLA-I	NSP1	102	110	ETLGVLVPH	9	No	NA	NA	NA	NA	NA	NA	HLA-A*68:01	0	0	0	1	1	1	0	0	0	0.317647
EpI_NSP1_94	HLA-I	NSP1	102	111	ETLGVLVPHV	10	No	NA	NA	NA	NA	NA	NA	HLA-A*68:02	0	0	0	0	0	0	0	0	1	0.047619
EpI_NSP1_95	HLA-I	NSP1	103	111	TLGVLVPHV	9	No	NA	NA	NA	NA	NA	NA	HLA-A*02:01, HLA-A*02:04, HLA-A*02:11, HLA-A*02:17, HLA-A*02:22	1	0	1	1	1	1	1	2	4	0.95852
EpI_NSP1_96	HLA-I	NSP1	106	116	VLVPHVGEIPV	11	No	NA	NA	NA	NA	NA	NA	HLA-A*02:01, HLA-A*02:11	1	0	1	1	1	1	1	2	1	0.815663
EpI_NSP1_97	HLA-I	NSP1	106	114	VLVPHVGEI	9	No	NA	NA	NA	NA	NA	NA	HLA-A*02:04, HLA-A*02:11, HLA-A*02:22, HLA-B*15:04, HLA-B*52:01, HLA-C*01:02, HLA-C*03:04, HLA-C*15:03, HLA-C*16:01	0	0	2	0	3	0	2	2	6	1.02965
EpI_NSP1_98	HLA-I	NSP1	108	116	VPHVGEIPV	9	No	NA	NA	NA	NA	NA	NA	HLA-B*07:02, HLA-B*35:01, HLA-B*35:05, HLA-B*35:11, HLA-B*35:12, HLA-B*51:04	2	0	2	2	0	0	3	1	1	0.857726
EpI_NSP1_99	HLA-I	NSP1	108	118	VPHVGEIPVAY	11	No	NA	NA	NA	NA	NA	NA	HLA-B*35:01, HLA-B*35:05, HLA-B*35:11, HLA-B*35:12, HLA-B*35:43	1	0	1	1	1	0	2	1	2	0.677171
EpI_NSP1_100	HLA-I	NSP1	110	119	HVGEIPVAYR	10	No	NA	NA	NA	NA	NA	NA	HLA-A*03:01, HLA-A*11:01, HLA-A*31:01, HLA-A*68:01	3	0	2	3	2	2	1	1	1	1.23975
EpI_NSP1_101	HLA-I	NSP1	110	120	HVGEIPVAYRK	11	No	NA	NA	NA	NA	NA	NA	HLA-A*03:01, HLA-A*11:01, HLA-A*68:01	2	0	2	2	2	2	0	0	0	0.841643
EpI_NSP1_102	HLA-I	NSP1	110	118	HVGEIPVAY	9	No	NA	NA	NA	NA	NA	NA	HLA-A*29:02, HLA-B*15:01, HLA-B*15:04, HLA-B*35:01, HLA-B*35:05, HLA-B*35:11, HLA-B*35:12, HLA-B*35:43, HLA-B*40:03, HLA-C*03:04, HLA-C*07:01, HLA-C*16:01	2	0	4	3	4	0	4	2	4	1.62605
EpI_NSP1_103	HLA-I	NSP1	111	119	VGEIPVAYR	9	No	NA	NA	NA	NA	NA	NA	HLA-A*31:01	1	0	0	1	0	0	1	1	1	0.398109
EpI_NSP1_104	HLA-I	NSP1	112	121	GEIPVAYRKV	10	No	NA	NA	NA	NA	NA	NA	HLA-B*40:02, HLA-B*40:03, HLA-B*40:04, HLA-B*44:03, HLA-B*52:01	1	0	1	0	2	1	2	0	3	0.813679
EpI_NSP1_105	HLA-I	NSP1	112	119	GEIPVAYR	8	No	NA	NA	NA	NA	NA	NA	HLA-B*40:03	0	0	0	0	0	0	1	0	0	0.125
EpI_NSP1_106	HLA-I	NSP1	112	120	GEIPVAYRK	9	No	NA	NA	NA	NA	NA	NA	HLA-B*40:03	0	0	0	0	0	0	1	0	0	0.125
EpI_NSP1_107	HLA-I	NSP1	112	122	GEIPVAYRKVL	11	No	NA	NA	NA	NA	NA	NA	HLA-B*40:03, HLA-B*40:04	0	0	0	0	0	0	2	0	1	0.297619
EpI_NSP1_108	HLA-I	NSP1	113	120	EIPVAYRK	8	No	NA	NA	NA	NA	NA	NA	HLA-A*68:01	0	0	0	1	1	1	0	0	0	0.317647
EpI_NSP1_109	HLA-I	NSP1	113	121	EIPVAYRKV	9	No	NA	NA	NA	NA	NA	NA	HLA-A*68:02	0	0	0	0	0	0	0	0	1	0.047619
EpI_NSP1_110	HLA-I	NSP1	114	122	IPVAYRKVL	9	No	NA	NA	NA	NA	NA	NA	HLA-B*07:02, HLA-B*08:01, HLA-B*35:05, HLA-B*35:11, HLA-B*35:12, HLA-B*35:43, HLA-B*39:09, HLA-B*51:04, HLA-C*01:02, HLA-C*03:04, HLA-C*16:01	2	0	4	2	4	0	3	1	5	1.37873
EpI_NSP1_111	HLA-I	NSP1	114	123	IPVAYRKVLL	10	No	NA	NA	NA	NA	NA	NA	HLA-B*07:02, HLA-B*35:12, HLA-B*51:04	1	0	1	1	0	0	1	0	1	0.334617
EpI_NSP1_112	HLA-I	NSP1	114	121	IPVAYRKV	8	No	NA	NA	NA	NA	NA	NA	HLA-B*51:04	0	0	0	0	0	0	1	0	0	0.125
EpI_NSP1_113	HLA-I	NSP1	116	124	VAYRKVLLR	9	No	NA	NA	NA	NA	NA	NA	HLA-A*03:01, HLA-A*11:01, HLA-A*31:01, HLA-A*68:01	3	0	2	3	2	2	1	1	1	1.23975
EpI_NSP1_114	HLA-I	NSP1	116	125	VAYRKVLLRK	10	No	NA	NA	NA	NA	NA	NA	HLA-A*03:01, HLA-A*11:01	2	0	2	1	1	1	0	0	0	0.523996
EpI_NSP1_115	HLA-I	NSP1	116	123	VAYRKVLL	8	No	NA	NA	NA	NA	NA	NA	HLA-B*51:04, HLA-B*52:01, HLA-C*01:02, HLA-C*03:04, HLA-C*16:01	0	0	2	0	3	0	1	1	3	0.650677
EpI_NSP1_116	HLA-I	NSP1	117	124	AYRKVLLR	8	No	NA	NA	NA	NA	NA	NA	HLA-A*31:01	1	0	0	1	0	0	1	1	1	0.398109
EpI_NSP1_117	HLA-I	NSP1	117	125	AYRKVLLRK	9	No	NA	NA	NA	NA	NA	NA	HLA-A*31:01	1	0	0	1	0	0	1	1	1	0.398109
EpI_NSP1_118	HLA-I	NSP1	120	129	KVLLRKNGNK	10	Yes	NA	NA	NA	VLLRKNGNK	69626	HLA-A*03:01, HLA-A*11:01, HLA-A*31:01	HLA-A*03:01	1	0	1	1	1	1	0	0	0	0.420822
EpI_NSP1_119	HLA-I	NSP1	121	129	VLLRKNGNK	9	Yes	NA	NA	NA	VLLRKNGNK	69626	HLA-A*03:01, HLA-A*11:01, HLA-A*31:01	HLA-A*03:01, HLA-A*11:01	2	0	2	1	1	1	0	0	0	0.523996
EpI_NSP1_120	HLA-I	NSP1	127	136	GNKGAGGHSY	10	No	NA	NA	NA	NA	NA	NA	HLA-B*15:01	0	0	0	0	0	0	0	0	1	0.047619
EpI_NSP1_121	HLA-I	NSP1	128	136	NKGAGGHSY	9	No	NA	NA	NA	NA	NA	NA	HLA-B*40:03	0	0	0	0	0	0	1	0	0	0.125
EpI_NSP1_122	HLA-I	NSP1	129	136	KGAGGHSY	8	No	NA	NA	NA	NA	NA	NA	HLA-B*15:01	0	0	0	0	0	0	0	0	1	0.047619
EpI_NSP1_123	HLA-I	NSP1	134	143	HSYGADLKSF	10	No	NA	NA	NA	NA	NA	NA	HLA-B*15:01, HLA-B*15:04, HLA-B*35:05, HLA-B*35:11, HLA-B*35:43, HLA-C*03:04, HLA-C*16:01	0	0	2	0	3	0	3	1	3	0.900677
EpI_NSP1_124	HLA-I	NSP1	135	143	SYGADLKSF	9	No	NA	NA	NA	NA	NA	NA	HLA-A*23:01, HLA-A*24:02, HLA-C*04:01	2	0	3	2	2	1	0	2	2	1.00672
EpI_NSP1_125	HLA-I	NSP1	137	145	GADLKSFDL	9	No	NA	NA	NA	NA	NA	NA	HLA-C*01:02, HLA-C*15:02, HLA-C*15:03	0	0	1	0	1	0	0	0	2	0.201681
EpI_NSP1_126	HLA-I	NSP1	140	149	LKSFDLGDEL	10	No	NA	NA	NA	NA	NA	NA	HLA-B*39:05	0	0	0	0	0	0	0	0	1	0.047619
EpI_NSP1_127	HLA-I	NSP1	141	149	KSFDLGDEL	9	No	NA	NA	NA	NA	NA	NA	HLA-B*15:04, HLA-B*35:12, HLA-B*39:05, HLA-B*39:09, HLA-C*01:02, HLA-C*03:04, HLA-C*07:01, HLA-C*15:02, HLA-C*15:03, HLA-C*16:01	1	0	4	2	4	0	1	1	6	1.1208
EpI_NSP1_128	HLA-I	NSP1	145	154	LGDELGTDPY	10	No	NA	NA	NA	NA	NA	NA	HLA-A*01:01	1	0	1	1	1	0	0	0	0	0.220822
EpI_NSP1_129	HLA-I	NSP1	147	154	DELGTDPY	8	No	NA	NA	NA	NA	NA	NA	HLA-B*18:01	1	0	0	1	0	0	0	0	0	0.114379
EpI_NSP1_130	HLA-I	NSP1	150	157	GTDPYEDF	8	No	NA	NA	NA	NA	NA	NA	HLA-A*01:01	1	0	1	1	1	0	0	0	0	0.220822
EpI_NSP1_131	HLA-I	NSP1	152	161	DPYEDFQENW	10	No	NA	NA	NA	NA	NA	NA	HLA-B*35:05, HLA-B*35:12, HLA-B*51:04	0	0	0	0	0	0	2	0	1	0.297619
EpI_NSP1_132	HLA-I	NSP1	162	171	NTKHSSGVTR	10	No	NA	NA	NA	NA	NA	NA	HLA-A*31:01, HLA-A*68:01	1	0	0	2	1	1	1	1	1	0.715756
EpI_NSP1_133	HLA-I	NSP1	164	173	KHSSGVTREL	10	No	NA	NA	NA	NA	NA	NA	HLA-B*39:05, HLA-B*39:09	0	0	0	1	0	0	0	0	2	0.154062
EpI_NSP1_134	HLA-I	NSP1	165	175	HSSGVTRELMR	11	No	NA	NA	NA	NA	NA	NA	HLA-A*68:01	0	0	0	1	1	1	0	0	0	0.317647
EpI_NSP1_135	HLA-I	NSP1	165	173	HSSGVTREL	9	No	NA	NA	NA	NA	NA	NA	HLA-A*68:02, HLA-B*35:05, HLA-B*35:11, HLA-B*35:12, HLA-B*35:43, HLA-C*01:02, HLA-C*03:04, HLA-C*07:01, HLA-C*15:02, HLA-C*15:03, HLA-C*16:01	1	0	4	1	5	0	2	1	6	1.2458
EpI_NSP1_136	HLA-I	NSP1	169	177	VTRELMREL	9	No	NA	NA	NA	NA	NA	NA	HLA-B*15:04, HLA-C*01:02, HLA-C*03:04, HLA-C*06:02, HLA-C*15:03, HLA-C*16:01	1	0	3	1	4	0	1	1	3	0.871499
EpI_NSP1_137	HLA-I	NSP1	170	177	TRELMREL	8	No	NA	NA	NA	NA	NA	NA	HLA-B*39:09	0	0	0	1	0	0	0	0	1	0.106443
EpI_NSP10_1	HLA-I	NSP10	3	13	NATEVPANSTV	11	No	NA	NA	NA	NA	NA	NA	HLA-B*40:04	0	0	0	0	0	0	1	0	1	0.172619
EpI_NSP10_2	HLA-I	NSP10	4	13	ATEVPANSTV	10	No	NA	NA	NA	NA	NA	NA	HLA-B*40:03, HLA-B*40:04, HLA-C*15:03	0	0	0	0	0	0	2	0	2	0.345238
EpI_NSP10_3	HLA-I	NSP10	5	13	TEVPANSTV	9	No	NA	NA	NA	NA	NA	NA	HLA-B*39:05, HLA-B*39:09, HLA-B*40:02, HLA-B*40:03, HLA-B*40:04, HLA-B*52:01	0	0	0	1	1	1	2	0	5	0.805742
EpI_NSP10_4	HLA-I	NSP10	5	14	TEVPANSTVL	10	No	NA	NA	NA	NA	NA	NA	HLA-B*39:05, HLA-B*39:09, HLA-B*40:02, HLA-B*40:03, HLA-B*40:04	0	0	0	1	1	1	2	0	4	0.758123
EpI_NSP10_5	HLA-I	NSP10	6	14	EVPANSTVL	9	No	NA	NA	NA	NA	NA	NA	HLA-A*68:02, HLA-B*35:11, HLA-B*35:12, HLA-B*35:43, HLA-B*39:09, HLA-B*51:04, HLA-C*01:02, HLA-C*03:04	0	0	1	1	3	0	2	1	6	0.929739
EpI_NSP10_6	HLA-I	NSP10	7	14	VPANSTVL	8	Yes	NA	NA	NA	VPANSTVLSF	70250	HLA-B*07:02, HLA-B*35:01, HLA-B*51:01, HLA-B*53:01	HLA-B*07:02, HLA-B*35:05, HLA-B*35:11, HLA-B*35:12, HLA-B*35:43, HLA-B*51:04	1	0	1	1	1	0	3	0	2	0.69106
EpI_NSP10_7	HLA-I	NSP10	7	16	VPANSTVLSF	10	Yes	NA	NA	NA	VPANSTVLSF	70250	HLA-B*07:02, HLA-B*35:01, HLA-B*51:01, HLA-B*53:01	HLA-B*07:02, HLA-B*35:01, HLA-B*35:05, HLA-B*35:11, HLA-B*35:12, HLA-B*35:43, HLA-B*51:04, HLA-C*16:01	2	0	3	2	2	0	3	1	2	1.07061
EpI_NSP10_8	HLA-I	NSP10	8	16	PANSTVLSF	9	Yes	NA	NA	NA	VPANSTVLSF	70250	HLA-B*07:02, HLA-B*35:01, HLA-B*51:01, HLA-B*53:01	HLA-B*35:05, HLA-B*35:11, HLA-B*35:43, HLA-B*51:04	0	0	0	0	1	0	3	0	1	0.481443
EpI_NSP10_9	HLA-I	NSP10	11	19	STVLSFCAF	9	No	NA	NA	NA	NA	NA	NA	HLA-B*15:01, HLA-B*35:43, HLA-C*16:01	0	0	1	0	2	0	0	0	2	0.260504
EpI_NSP10_10	HLA-I	NSP10	12	20	TVLSFCAFA	9	Yes	NA	NA	NA	TVLSFCAFA	67078	HLA-A*02:01, HLA-A*02:02, HLA-A*02:03, HLA-A*02:06, HLA-A*68:02	HLA-A*68:02	0	0	0	0	0	0	0	0	1	0.047619
EpI_NSP10_11	HLA-I	NSP10	12	21	TVLSFCAFAV	10	Yes	NA	NA	NA	TVLSFCAFA, VLSFCAFAV	67078, 69758	HLA-A*02:01, HLA-A*02:02, HLA-A*02:03, HLA-A*02:06, HLA-A*68:02	HLA-A*68:02	0	0	0	0	0	0	0	0	1	0.047619
EpI_NSP10_12	HLA-I	NSP10	13	21	VLSFCAFAV	9	Yes	NA	NA	NA	VLSFCAFAV	69758	HLA-A*02:01, HLA-A*02:02, HLA-A*02:03, HLA-A*02:06, HLA-A*68:02	HLA-A*02:01, HLA-A*02:04, HLA-A*02:11, HLA-A*02:17, HLA-A*02:22	1	0	1	1	1	1	1	2	4	0.95852
EpI_NSP10_13	HLA-I	NSP10	16	25	FCAFAVDAAK	10	No	NA	NA	NA	NA	NA	NA	HLA-A*68:01	0	0	0	1	1	1	0	0	0	0.317647
EpI_NSP10_14	HLA-I	NSP10	17	25	CAFAVDAAK	9	No	NA	NA	NA	NA	NA	NA	HLA-A*11:01, HLA-A*68:01	1	0	1	1	1	1	0	0	0	0.420822
EpI_NSP10_15	HLA-I	NSP10	18	27	AFAVDAAKAY	10	No	NA	NA	NA	NA	NA	NA	HLA-A*29:02, HLA-B*15:04, HLA-B*35:05, HLA-B*35:11, HLA-B*35:43	0	0	0	1	1	0	3	0	1	0.540266
EpI_NSP10_16	HLA-I	NSP10	19	28	FAVDAAKAYK	10	No	NA	NA	NA	NA	NA	NA	HLA-A*11:01, HLA-A*68:01, HLA-B*35:05, HLA-B*35:11, HLA-B*35:43	1	0	1	1	2	1	2	0	1	0.777264
EpI_NSP10_17	HLA-I	NSP10	19	27	FAVDAAKAY	9	No	NA	NA	NA	NA	NA	NA	HLA-A*29:02, HLA-A*68:01, HLA-B*15:01, HLA-B*15:04, HLA-B*35:01, HLA-B*35:05, HLA-B*35:11, HLA-B*35:12, HLA-B*35:43, HLA-B*40:03, HLA-B*51:04, HLA-C*03:03, HLA-C*03:04, HLA-C*06:02, HLA-C*07:01, HLA-C*07:02, HLA-C*12:03, HLA-C*16:01	5	0	7	6	7	1	5	3	5	2.77225
EpI_NSP10_18	HLA-I	NSP10	20	28	AVDAAKAYK	9	No	NA	NA	NA	NA	NA	NA	HLA-A*03:01, HLA-A*11:01, HLA-A*31:01, HLA-A*68:01	3	0	2	3	2	2	1	1	1	1.23975
EpI_NSP10_19	HLA-I	NSP10	20	27	AVDAAKAY	8	No	NA	NA	NA	NA	NA	NA	HLA-B*35:05, HLA-B*35:11, HLA-B*35:43	0	0	0	0	1	0	2	0	1	0.356443
EpI_NSP10_20	HLA-I	NSP10	22	30	DAAKAYKDY	9	No	NA	NA	NA	NA	NA	NA	HLA-B*35:05, HLA-B*35:11, HLA-B*35:43	0	0	0	0	1	0	2	0	1	0.356443
EpI_NSP10_21	HLA-I	NSP10	22	31	DAAKAYKDYL	10	No	NA	NA	NA	NA	NA	NA	HLA-B*51:04	0	0	0	0	0	0	1	0	0	0.125
EpI_NSP10_22	HLA-I	NSP10	23	31	AAKAYKDYL	9	No	NA	NA	NA	NA	NA	NA	HLA-C*01:02, HLA-C*03:04, HLA-C*16:01	0	0	2	0	3	0	0	1	2	0.478058
EpI_NSP10_23	HLA-I	NSP10	30	38	YLASGGQPI	9	No	NA	NA	NA	NA	NA	NA	HLA-A*02:01, HLA-A*02:04, HLA-A*02:11, HLA-A*02:17, HLA-A*02:22, HLA-A*68:02, HLA-B*15:01, HLA-B*15:04, HLA-B*35:12, HLA-B*35:43, HLA-B*39:09, HLA-C*01:02, HLA-C*03:03, HLA-C*03:04, HLA-C*04:01, HLA-C*05:01, HLA-C*08:02, HLA-C*15:03, HLA-C*16:01	3	0	7	4	7	1	2	4	13	2.66055
EpI_NSP10_24	HLA-I	NSP10	36	44	QPITNCVKM	9	No	NA	NA	NA	NA	NA	NA	HLA-B*35:01, HLA-B*35:05, HLA-B*35:11, HLA-B*35:12, HLA-B*35:43, HLA-B*51:04	1	0	1	1	1	0	3	1	2	0.802171
EpI_NSP10_25	HLA-I	NSP10	36	45	QPITNCVKML	10	No	NA	NA	NA	NA	NA	NA	HLA-B*35:12, HLA-B*51:04	0	0	0	0	0	0	1	0	1	0.172619
EpI_NSP10_26	HLA-I	NSP10	47	55	THTGTGQAI	9	No	NA	NA	NA	NA	NA	NA	HLA-B*39:05, HLA-B*39:09, HLA-B*52:01	0	0	0	1	0	0	0	0	3	0.201681
EpI_NSP10_27	HLA-I	NSP10	47	57	THTGTGQAITV	11	No	NA	NA	NA	NA	NA	NA	HLA-B*39:05	0	0	0	0	0	0	0	0	1	0.047619
EpI_NSP10_28	HLA-I	NSP10	48	57	HTGTGQAITV	10	No	NA	NA	NA	NA	NA	NA	HLA-A*68:02	0	0	0	0	0	0	0	0	1	0.047619
EpI_NSP10_29	HLA-I	NSP10	53	61	QAITVTPEA	9	No	NA	NA	NA	NA	NA	NA	HLA-A*68:02	0	0	0	0	0	0	0	0	1	0.047619
EpI_NSP10_30	HLA-I	NSP10	55	63	ITVTPEANM	9	No	NA	NA	NA	NA	NA	NA	HLA-A*68:02, HLA-B*15:04, HLA-B*35:43, HLA-C*03:04, HLA-C*15:03	0	0	1	0	2	0	1	1	4	0.591853
EpI_NSP10_31	HLA-I	NSP10	60	68	EANMDQESF	9	Yes	NA	NA	NA	PEANMDQESF	47238	HLA-B*40:01	HLA-B*35:01, HLA-B*35:05, HLA-B*35:11, HLA-B*35:12, HLA-B*35:43, HLA-B*51:04	1	0	1	1	1	0	3	1	2	0.802171
EpI_NSP10_32	HLA-I	NSP10	65	73	QESFGGASC	9	No	NA	NA	NA	NA	NA	NA	HLA-B*40:02, HLA-B*40:04	0	0	0	0	1	1	1	0	2	0.479062
EpI_NSP10_33	HLA-I	NSP10	65	75	QESFGGASCCL	11	No	NA	NA	NA	NA	NA	NA	HLA-B*40:02, HLA-B*40:04	0	0	0	0	1	1	1	0	2	0.479062
EpI_NSP10_34	HLA-I	NSP10	66	76	ESFGGASCCLY	11	Yes	NA	NA	NA	SFGGASCCLY	57776	HLA-A*03:01, HLA-A*11:01, HLA-A*31:01, HLA-A*33:01, HLA-A:68:01	HLA-A*01:01, HLA-A*29:02, HLA-A*68:01	1	0	1	3	2	1	0	0	0	0.597292
EpI_NSP10_35	HLA-I	NSP10	67	76	SFGGASCCLY	10	Yes	NA	NA	NA	SFGGASCCLY	57776	HLA-A*03:01, HLA-A*11:01, HLA-A*31:01, HLA-A*33:01, HLA-A:68:01	HLA-A*29:02	0	0	0	1	0	0	0	0	0	0.0588235
EpI_NSP10_36	HLA-I	NSP10	81	89	IDHPNPKGF	9	No	NA	NA	NA	NA	NA	NA	HLA-B*40:03	0	0	0	0	0	0	1	0	0	0.125
EpI_NSP10_37	HLA-I	NSP10	83	92	HPNPKGFCDL	10	Yes	NA	NA	NA	HPNPKGFCDL	24482	HLA-B*07:02, HLA-B*35:01, HLA-B*51:01, HLA-B*53:01	HLA-B*07:02, HLA-B*08:01, HLA-B*35:05, HLA-B*35:11, HLA-B*35:12, HLA-B*51:04	2	0	2	1	0	0	3	0	1	0.687792
EpI_NSP10_38	HLA-I	NSP10	85	92	NPKGFCDL	8	Yes	NA	NA	NA	HPNPKGFCDL	24482	HLA-B*07:02, HLA-B*35:01, HLA-B*51:01, HLA-B*53:01	HLA-B*08:01	1	0	1	0	0	0	0	0	0	0.103175
EpI_NSP10_39	HLA-I	NSP10	88	96	GFCDLKGKY	9	No	NA	NA	NA	NA	NA	NA	HLA-A*29:02	0	0	0	1	0	0	0	0	0	0.0588235
EpI_NSP10_40	HLA-I	NSP10	89	96	FCDLKGKY	8	No	NA	NA	NA	NA	NA	NA	HLA-A*01:01	1	0	1	1	1	0	0	0	0	0.220822
EpI_NSP10_41	HLA-I	NSP10	89	97	FCDLKGKYV	9	No	NA	NA	NA	NA	NA	NA	HLA-C*04:01, HLA-C*05:01	2	0	2	2	2	0	0	1	1	0.600373
EpI_NSP10_42	HLA-I	NSP10	91	99	DLKGKYVQI	9	No	NA	NA	NA	NA	NA	NA	HLA-B*08:01	1	0	1	0	0	0	0	0	0	0.103175
EpI_NSP10_43	HLA-I	NSP10	95	103	KYVQIPTTC	9	No	NA	NA	NA	NA	NA	NA	HLA-A*23:01, HLA-A*24:02	1	0	2	1	1	1	0	1	1	0.627171
EpI_NSP10_44	HLA-I	NSP10	104	113	ANDPVGFTLK	10	No	NA	NA	NA	NA	NA	NA	HLA-A*11:01	1	0	1	0	0	0	0	0	0	0.103175
EpI_NSP10_45	HLA-I	NSP10	104	112	ANDPVGFTL	9	No	NA	NA	NA	NA	NA	NA	HLA-B*35:12, HLA-B*39:05, HLA-B*39:09, HLA-B*40:03, HLA-B*40:04, HLA-B*52:01, HLA-C*01:02, HLA-C*03:04, HLA-C*05:01, HLA-C*07:01, HLA-C*15:02, HLA-C*15:03, HLA-C*16:01	2	0	5	3	5	0	2	1	8	1.56186
EpI_NSP10_46	HLA-I	NSP10	106	116	DPVGFTLKNTV	11	No	NA	NA	NA	NA	NA	NA	HLA-B*35:12, HLA-B*51:04	0	0	0	0	0	0	1	0	1	0.172619
EpI_NSP10_47	HLA-I	NSP10	108	116	VGFTLKNTV	9	No	NA	NA	NA	NA	NA	NA	HLA-B*51:04, HLA-B*52:01, HLA-C*03:04, HLA-C*16:01	0	0	2	0	2	0	1	1	2	0.544234
EpI_NSP10_48	HLA-I	NSP10	110	119	FTLKNTVCTV	10	No	NA	NA	NA	NA	NA	NA	HLA-A*68:02	0	0	0	0	0	0	0	0	1	0.047619
EpI_NSP10_49	HLA-I	NSP10	111	119	TLKNTVCTV	9	No	NA	NA	NA	NA	NA	NA	HLA-A*02:04, HLA-A*02:11, HLA-A*02:22	0	0	0	0	0	0	1	1	2	0.331349
EpI_NSP10_50	HLA-I	NSP10	114	122	NTVCTVCGM	9	No	NA	NA	NA	NA	NA	NA	HLA-A*68:02	0	0	0	0	0	0	0	0	1	0.047619
EpI_NSP10_51	HLA-I	NSP10	115	124	TVCTVCGMWK	10	Yes	NA	NA	NA	TVCTVCGMWK	66958	HLA-A*03:01, HLA-A*11:01, HLA-A*31:01, HLA-A*33:01, HLA-A:68:01	HLA-A*11:01	1	0	1	0	0	0	0	0	0	0.103175
EpI_NSP10_52	HLA-I	NSP10	118	126	TVCGMWKGY	9	No	NA	NA	NA	NA	NA	NA	HLA-A*29:02	0	0	0	1	0	0	0	0	0	0.0588235
EpI_NSP12_1	HLA-I	NSP12	1	10	SADAQSFLNR	10	No	NA	NA	NA	NA	NA	NA	HLA-A*11:01, HLA-A*68:01	1	0	1	1	1	1	0	0	0	0.420822
EpI_NSP12_2	HLA-I	NSP12	1	8	SADAQSFL	8	No	NA	NA	NA	NA	NA	NA	HLA-C*05:01, HLA-C*08:02	1	0	2	1	1	0	0	0	0	0.268441
EpI_NSP12_3	HLA-I	NSP12	3	11	DAQSFLNRV	9	No	NA	NA	NA	NA	NA	NA	HLA-A*68:02, HLA-B*35:12	0	0	0	0	0	0	0	0	2	0.0952381
EpI_NSP12_4	HLA-I	NSP12	7	16	FLNRVCGVSA	10	No	NA	NA	NA	NA	NA	NA	HLA-A*02:11, HLA-A*02:22	0	0	0	0	0	0	1	1	1	0.28373
EpI_NSP12_5	HLA-I	NSP12	9	18	NRVCGVSAAR	10	No	NA	NA	NA	NA	NA	NA	HLA-A*68:01	0	0	0	1	1	1	0	0	0	0.317647
EpI_NSP12_6	HLA-I	NSP12	9	17	NRVCGVSAA	9	No	NA	NA	NA	NA	NA	NA	HLA-B*39:05, HLA-B*39:09	0	0	0	1	0	0	0	0	2	0.154062
EpI_NSP12_7	HLA-I	NSP12	10	18	RVCGVSAAR	9	No	NA	NA	NA	NA	NA	NA	HLA-A*03:01, HLA-A*11:01, HLA-A*31:01, HLA-A*68:01	3	0	2	3	2	2	1	1	1	1.23975
EpI_NSP12_8	HLA-I	NSP12	23	33	GTGTSTDVVYR	11	Yes	NA	NA	NA	GTSTDVVYR	22846	HLA-A*03:01, HLA-A*11:01, HLA-A*31:01, HLA-A*33:01, HLA-A*68:01, Patr-A*01:01	HLA-A*11:01, HLA-A*68:01	1	0	1	1	1	1	0	0	0	0.420822
EpI_NSP12_9	HLA-I	NSP12	23	32	GTGTSTDVVY	10	No	NA	NA	NA	NA	NA	NA	HLA-B*15:01	0	0	0	0	0	0	0	0	1	0.047619
EpI_NSP12_10	HLA-I	NSP12	24	33	TGTSTDVVYR	10	Yes	NA	NA	NA	GTSTDVVYR	22846	HLA-A*03:01, HLA-A*11:01, HLA-A*31:01, HLA-A*33:01, HLA-A*68:01, Patr-A*01:01	HLA-A*68:01	0	0	0	1	1	1	0	0	0	0.317647
EpI_NSP12_11	HLA-I	NSP12	24	32	TGTSTDVVY	9	No	NA	NA	NA	NA	NA	NA	HLA-B*35:01, HLA-B*35:05, HLA-B*35:11, HLA-B*35:43	1	0	1	1	1	0	2	1	1	0.629552
EpI_NSP12_12	HLA-I	NSP12	25	32	GTSTDVVY	8	Yes	NA	NA	NA	GTSTDVVYR	22846	HLA-A*03:01, HLA-A*11:01, HLA-A*31:01, HLA-A*33:01, HLA-A*68:01, Patr-A*01:01	HLA-A*01:01	1	0	1	1	1	0	0	0	0	0.220822
EpI_NSP12_13	HLA-I	NSP12	25	33	GTSTDVVYR	9	Yes	NA	NA	NA	GTSTDVVYR	22846	HLA-A*03:01, HLA-A*11:01, HLA-A*31:01, HLA-A*33:01, HLA-A*68:01, Patr-A*01:01	HLA-A*11:01, HLA-A*31:01, HLA-A*68:01	2	0	1	2	1	1	1	1	1	0.818931
EpI_NSP12_14	HLA-I	NSP12	26	33	TSTDVVYR	8	Yes	NA	NA	NA	GTSTDVVYR	22846	HLA-A*03:01, HLA-A*11:01, HLA-A*31:01, HLA-A*33:01, HLA-A*68:01, Patr-A*01:01	HLA-A*68:01	0	0	0	1	1	1	0	0	0	0.317647
EpI_NSP12_15	HLA-I	NSP12	26	34	TSTDVVYRA	9	No	NA	NA	NA	NA	NA	NA	HLA-A*68:02	0	0	0	0	0	0	0	0	1	0.047619
EpI_NSP12_16	HLA-I	NSP12	26	35	TSTDVVYRAF	10	No	NA	NA	NA	NA	NA	NA	HLA-B*35:43	0	0	0	0	1	0	0	0	1	0.106443
EpI_NSP12_17	HLA-I	NSP12	27	35	STDVVYRAF	9	No	NA	NA	NA	NA	NA	NA	HLA-B*35:05, HLA-B*35:11, HLA-B*35:43, HLA-C*01:02, HLA-C*03:04, HLA-C*04:01, HLA-C*07:01, HLA-C*15:03, HLA-C*16:01	2	0	4	2	6	0	2	2	5	1.48249
EpI_NSP12_18	HLA-I	NSP12	29	37	DVVYRAFDI	9	No	NA	NA	NA	NA	NA	NA	HLA-A*68:02	0	0	0	0	0	0	0	0	1	0.047619
EpI_NSP12_19	HLA-I	NSP12	30	38	VVYRAFDIY	9	Yes	NA	NA	NA	VVYRAFDIY	71916	HLA-A*03:01, HLA-A*11:01, HLA-A*68:01	HLA-A*11:01, HLA-A*29:02, HLA-B*15:01, HLA-B*15:04, HLA-B*35:05, HLA-B*35:11, HLA-B*35:43	1	0	1	1	1	0	3	0	2	0.69106
EpI_NSP12_20	HLA-I	NSP12	33	41	RAFDIYNDK	9	No	NA	NA	NA	NA	NA	NA	HLA-A*03:01, HLA-A*11:01, HLA-A*31:01, HLA-A*68:01	3	0	2	3	2	2	1	1	1	1.23975
EpI_NSP12_21	HLA-I	NSP12	33	42	RAFDIYNDKV	10	No	NA	NA	NA	NA	NA	NA	HLA-A*68:02, HLA-C*15:03	0	0	0	0	0	0	0	0	2	0.0952381
EpI_NSP12_22	HLA-I	NSP12	36	45	DIYNDKVAGF	10	No	NA	NA	NA	NA	NA	NA	HLA-B*35:05, HLA-B*35:11, HLA-B*35:43	0	0	0	0	1	0	2	0	1	0.356443
EpI_NSP12_23	HLA-I	NSP12	37	45	IYNDKVAGF	9	No	NA	NA	NA	NA	NA	NA	HLA-A*24:02, HLA-C*01:02, HLA-C*06:02, HLA-C*07:01, HLA-C*16:01	3	0	4	3	5	1	0	1	2	1.23408
EpI_NSP12_24	HLA-I	NSP12	40	48	DKVAGFAKF	9	No	NA	NA	NA	NA	NA	NA	HLA-B*18:01, HLA-B*35:43, HLA-B*39:05, HLA-B*39:09	1	0	0	2	1	0	0	0	3	0.374883
EpI_NSP12_25	HLA-I	NSP12	41	49	KVAGFAKFL	9	Yes	NA	NA	NA	KVAGFAKFLK	33948	HLA-A*03:01, HLA-A*11:01, HLA-A*31:01, HLA-A*33:01, HLA-A*68:01, Patr-A*01:01	HLA-A*02:04, HLA-A*02:22, HLA-C*01:02, HLA-C*03:04, HLA-C*07:01, HLA-C*15:02, HLA-C*15:03, HLA-C*16:01	1	0	4	1	4	0	0	1	5	0.889356
EpI_NSP12_26	HLA-I	NSP12	41	50	KVAGFAKFLK	10	Yes	NA	NA	NA	KVAGFAKFLK	33948	HLA-A*03:01, HLA-A*11:01, HLA-A*31:01, HLA-A*33:01, HLA-A*68:01, Patr-A*01:01	HLA-A*03:01, HLA-A*11:01, HLA-A*31:01, HLA-A*68:01	3	0	2	3	2	2	1	1	1	1.23975
EpI_NSP12_27	HLA-I	NSP12	41	48	KVAGFAKF	8	Yes	NA	NA	NA	KVAGFAKFLK, NEKVAGFAKF	33948, 43661	HLA-A*03:01, HLA-A*11:01, HLA-A*31:01, HLA-A*33:01, HLA-A*68:01, Patr-A*01:01, HLA-B*18:01, HLA-B*44:02, HLA-B*44:03	HLA-B*15:01, HLA-B*15:04	0	0	0	0	0	0	1	0	1	0.172619
EpI_NSP12_28	HLA-I	NSP12	42	50	VAGFAKFLK	9	Yes	NA	NA	NA	KVAGFAKFLK	33948	HLA-A*03:01, HLA-A*11:01, HLA-A*31:01, HLA-A*33:01, HLA-A*68:01, Patr-A*01:01	HLA-A*03:01, HLA-A*11:01, HLA-A*31:01, HLA-A*68:01	3	0	2	3	2	2	1	1	1	1.23975
EpI_NSP12_29	HLA-I	NSP12	47	56	KFLKTNCCRF	10	No	NA	NA	NA	NA	NA	NA	HLA-A*24:02	1	0	1	1	1	1	0	1	1	0.579552
EpI_NSP12_30	HLA-I	NSP12	47	55	KFLKTNCCR	9	No	NA	NA	NA	NA	NA	NA	HLA-A*31:01	1	0	0	1	0	0	1	1	1	0.398109
EpI_NSP12_31	HLA-I	NSP12	58	66	EKDEDDNLI	9	No	NA	NA	NA	NA	NA	NA	HLA-B*39:05	0	0	0	0	0	0	0	0	1	0.047619
EpI_NSP12_32	HLA-I	NSP12	60	69	DEDDNLIDSY	10	No	NA	NA	NA	NA	NA	NA	HLA-B*18:01	1	0	0	1	0	0	0	0	0	0.114379
EpI_NSP12_33	HLA-I	NSP12	60	70	DEDDNLIDSYF	11	No	NA	NA	NA	NA	NA	NA	HLA-B*18:01	1	0	0	1	0	0	0	0	0	0.114379
EpI_NSP12_34	HLA-I	NSP12	64	71	NLIDSYFV	8	No	NA	NA	NA	NA	NA	NA	HLA-A*02:01, HLA-A*02:04, HLA-A*02:11, HLA-A*02:17, HLA-A*02:22	1	0	1	1	1	1	1	2	4	0.95852
EpI_NSP12_35	HLA-I	NSP12	64	72	NLIDSYFVV	9	No	NA	NA	NA	NA	NA	NA	HLA-A*02:01, HLA-A*02:04, HLA-A*02:11, HLA-A*02:17, HLA-A*02:22, HLA-A*68:02, HLA-B*39:09, HLA-C*01:02, HLA-C*03:04, HLA-C*15:03	1	0	2	2	3	1	1	3	9	1.53182
EpI_NSP12_36	HLA-I	NSP12	64	73	NLIDSYFVVK	10	No	NA	NA	NA	NA	NA	NA	HLA-A*03:01, HLA-A*11:01, HLA-A*68:01	2	0	2	2	2	2	0	0	0	0.841643
EpI_NSP12_37	HLA-I	NSP12	64	74	NLIDSYFVVKR	11	No	NA	NA	NA	NA	NA	NA	HLA-A*68:01	0	0	0	1	1	1	0	0	0	0.317647
EpI_NSP12_38	HLA-I	NSP12	65	73	LIDSYFVVK	9	No	NA	NA	NA	NA	NA	NA	HLA-A*03:01, HLA-A*11:01, HLA-A*68:01	2	0	2	2	2	2	0	0	0	0.841643
EpI_NSP12_39	HLA-I	NSP12	67	74	DSYFVVKR	8	No	NA	NA	NA	NA	NA	NA	HLA-A*68:01	0	0	0	1	1	1	0	0	0	0.317647
EpI_NSP12_40	HLA-I	NSP12	68	77	SYFVVKRHTF	10	No	NA	NA	NA	NA	NA	NA	HLA-A*23:01, HLA-A*24:02, HLA-A*29:02, HLA-C*07:01	2	0	3	3	2	1	0	1	1	0.906816
EpI_NSP12_41	HLA-I	NSP12	69	77	YFVVKRHTF	9	No	NA	NA	NA	NA	NA	NA	HLA-A*23:01, HLA-A*24:02, HLA-A*29:02, HLA-B*35:05, HLA-B*35:11, HLA-B*35:43, HLA-B*39:09, HLA-C*01:02, HLA-C*07:01, HLA-C*16:01	2	0	4	4	5	1	2	1	4	1.58259
EpI_NSP12_42	HLA-I	NSP12	70	77	FVVKRHTF	8	No	NA	NA	NA	NA	NA	NA	HLA-B*08:01, HLA-B*35:05, HLA-B*35:11, HLA-B*35:43, HLA-C*16:01	1	0	2	0	2	0	2	0	1	0.56606
EpI_NSP12_43	HLA-I	NSP12	71	80	VVKRHTFSNY	10	No	NA	NA	NA	NA	NA	NA	HLA-B*15:01	0	0	0	0	0	0	0	0	1	0.047619
EpI_NSP12_44	HLA-I	NSP12	72	80	VKRHTFSNY	9	No	NA	NA	NA	NA	NA	NA	HLA-B*15:04	0	0	0	0	0	0	1	0	0	0.125
EpI_NSP12_45	HLA-I	NSP12	77	87	FSNYQHEETIY	11	No	NA	NA	NA	NA	NA	NA	HLA-A*01:01	1	0	1	1	1	0	0	0	0	0.220822
EpI_NSP12_46	HLA-I	NSP12	78	87	SNYQHEETIY	10	No	NA	NA	NA	NA	NA	NA	HLA-B*15:04	0	0	0	0	0	0	1	0	0	0.125
EpI_NSP12_47	HLA-I	NSP12	78	86	SNYQHEETI	9	No	NA	NA	NA	NA	NA	NA	HLA-B*39:05, HLA-B*39:09	0	0	0	1	0	0	0	0	2	0.154062
EpI_NSP12_48	HLA-I	NSP12	79	89	NYQHEETIYNL	11	No	NA	NA	NA	NA	NA	NA	HLA-A*23:01, HLA-A*24:02, HLA-B*39:05, HLA-B*39:09	1	0	2	2	1	1	0	1	3	0.781232
EpI_NSP12_49	HLA-I	NSP12	80	89	YQHEETIYNL	10	No	NA	NA	NA	NA	NA	NA	HLA-A*02:01, HLA-A*02:04, HLA-A*02:11, HLA-A*02:17, HLA-A*02:22, HLA-B*15:04, HLA-B*39:05, HLA-B*39:09	1	0	1	2	1	1	2	2	6	1.23758
EpI_NSP12_50	HLA-I	NSP12	80	87	YQHEETIY	8	No	NA	NA	NA	NA	NA	NA	HLA-B*15:01, HLA-B*15:04, HLA-B*18:01, HLA-B*35:43	1	0	0	1	1	0	1	0	2	0.393441
EpI_NSP12_51	HLA-I	NSP12	80	90	YQHEETIYNLL	11	No	NA	NA	NA	NA	NA	NA	HLA-B*39:05, HLA-B*39:09	0	0	0	1	0	0	0	0	2	0.154062
EpI_NSP12_52	HLA-I	NSP12	81	89	QHEETIYNL	9	No	NA	NA	NA	NA	NA	NA	HLA-B*39:05, HLA-B*39:09, HLA-C*07:01	1	0	1	2	1	0	0	0	2	0.374883
EpI_NSP12_53	HLA-I	NSP12	81	90	QHEETIYNLL	10	No	NA	NA	NA	NA	NA	NA	HLA-B*39:05, HLA-B*39:09	0	0	0	1	0	0	0	0	2	0.154062
EpI_NSP12_54	HLA-I	NSP12	82	89	HEETIYNL	8	No	NA	NA	NA	NA	NA	NA	HLA-B*39:05, HLA-B*39:09, HLA-B*40:02	0	0	0	1	1	1	0	0	3	0.460504
EpI_NSP12_55	HLA-I	NSP12	82	90	HEETIYNLL	9	No	NA	NA	NA	NA	NA	NA	HLA-B*39:05, HLA-B*39:09, HLA-B*40:02	0	0	0	1	1	1	0	0	3	0.460504
EpI_NSP12_56	HLA-I	NSP12	84	91	ETIYNLLK	8	No	NA	NA	NA	NA	NA	NA	HLA-A*68:01	0	0	0	1	1	1	0	0	0	0.317647
EpI_NSP12_57	HLA-I	NSP12	87	96	YNLLKDCPAV	10	No	NA	NA	NA	NA	NA	NA	HLA-A*02:04, HLA-A*02:22	0	0	0	0	0	0	0	0	2	0.0952381
EpI_NSP12_58	HLA-I	NSP12	88	96	NLLKDCPAV	9	No	NA	NA	NA	NA	NA	NA	HLA-A*02:01, HLA-A*02:04, HLA-A*02:11, HLA-A*02:17, HLA-A*02:22	1	0	1	1	1	1	1	2	4	0.95852
EpI_NSP12_59	HLA-I	NSP12	89	97	LLKDCPAVA	9	No	NA	NA	NA	NA	NA	NA	HLA-A*02:22	0	0	0	0	0	0	0	0	1	0.047619
EpI_NSP12_60	HLA-I	NSP12	89	98	LLKDCPAVAK	10	No	NA	NA	NA	NA	NA	NA	HLA-A*03:01, HLA-A*11:01	2	0	2	1	1	1	0	0	0	0.523996
EpI_NSP12_61	HLA-I	NSP12	93	101	CPAVAKHDF	9	No	NA	NA	NA	NA	NA	NA	HLA-B*35:01, HLA-B*35:05, HLA-B*35:11, HLA-B*35:12, HLA-B*35:43	1	0	1	1	1	0	2	1	2	0.677171
EpI_NSP12_62	HLA-I	NSP12	94	103	PAVAKHDFFK	10	No	NA	NA	NA	NA	NA	NA	HLA-A*11:01	1	0	1	0	0	0	0	0	0	0.103175
EpI_NSP12_63	HLA-I	NSP12	95	103	AVAKHDFFK	9	No	NA	NA	NA	NA	NA	NA	HLA-A*03:01, HLA-A*11:01, HLA-A*31:01, HLA-A*68:01	3	0	2	3	2	2	1	1	1	1.23975
EpI_NSP12_64	HLA-I	NSP12	95	104	AVAKHDFFKF	10	No	NA	NA	NA	NA	NA	NA	HLA-A*23:01, HLA-B*15:01	0	0	1	0	0	0	0	0	1	0.0952381
EpI_NSP12_65	HLA-I	NSP12	95	105	AVAKHDFFKFR	11	No	NA	NA	NA	NA	NA	NA	HLA-A*31:01, HLA-A*68:01	1	0	0	2	1	1	1	1	1	0.715756
EpI_NSP12_66	HLA-I	NSP12	96	104	VAKHDFFKF	9	No	NA	NA	NA	NA	NA	NA	HLA-A*23:01, HLA-A*24:02, HLA-B*15:04, HLA-B*35:05, HLA-B*35:11, HLA-B*35:43, HLA-C*16:01	1	0	3	1	3	1	3	1	2	1.21506
EpI_NSP12_67	HLA-I	NSP12	96	105	VAKHDFFKFR	10	No	NA	NA	NA	NA	NA	NA	HLA-A*31:01, HLA-A*68:01	1	0	0	2	1	1	1	1	1	0.715756
EpI_NSP12_68	HLA-I	NSP12	97	105	AKHDFFKFR	9	No	NA	NA	NA	NA	NA	NA	HLA-A*31:01	1	0	0	1	0	0	1	1	1	0.398109
EpI_NSP12_69	HLA-I	NSP12	98	106	KHDFFKFRI	9	No	NA	NA	NA	NA	NA	NA	HLA-B*39:05, HLA-B*39:09	0	0	0	1	0	0	0	0	2	0.154062
EpI_NSP12_70	HLA-I	NSP12	104	111	FRIDGDMV	8	No	NA	NA	NA	NA	NA	NA	HLA-B*39:05, HLA-B*39:09, HLA-C*07:01	1	0	1	2	1	0	0	0	2	0.374883
EpI_NSP12_71	HLA-I	NSP12	104	112	FRIDGDMVP	9	No	NA	NA	NA	NA	NA	NA	HLA-B*39:05, HLA-B*39:09	0	0	0	1	0	0	0	0	2	0.154062
EpI_NSP12_72	HLA-I	NSP12	104	114	FRIDGDMVPHI	11	No	NA	NA	NA	NA	NA	NA	HLA-B*39:05, HLA-B*39:09, HLA-C*07:01	1	0	1	2	1	0	0	0	2	0.374883
EpI_NSP12_73	HLA-I	NSP12	105	114	RIDGDMVPHI	10	No	NA	NA	NA	NA	NA	NA	HLA-A*02:01, HLA-A*02:04, HLA-A*02:11, HLA-C*15:03	1	0	1	1	1	1	1	2	3	0.910901
EpI_NSP12_74	HLA-I	NSP12	109	118	DMVPHISRQR	10	No	NA	NA	NA	NA	NA	NA	HLA-A*68:01	0	0	0	1	1	1	0	0	0	0.317647
EpI_NSP12_75	HLA-I	NSP12	110	118	MVPHISRQR	9	No	NA	NA	NA	NA	NA	NA	HLA-A*31:01, HLA-A*68:01	1	0	0	2	1	1	1	1	1	0.715756
EpI_NSP12_76	HLA-I	NSP12	111	119	VPHISRQRL	9	Yes	NA	NA	NA	VPHISRQRL	70325	HLA-B*07:02	HLA-B*07:02, HLA-B*35:05, HLA-B*35:11, HLA-B*35:12, HLA-B*35:43, HLA-C*01:02	1	0	1	1	2	0	2	0	3	0.672502
EpI_NSP12_77	HLA-I	NSP12	113	121	HISRQRLTK	9	Yes	NA	NA	NA	HISRQRLTKY	24094	HLA-A*26:01, HLA-A*29:02, HLA-A*30:02	HLA-A*03:01, HLA-A*11:01, HLA-A*68:01	2	0	2	2	2	2	0	0	0	0.841643
EpI_NSP12_78	HLA-I	NSP12	113	122	HISRQRLTKY	10	Yes	NA	NA	NA	HISRQRLTKY, ISRQRLTKY	24094, 28705	HLA-A*26:01, HLA-A*29:02, HLA-A*30:02, HLA-A*01:01	HLA-B*15:01, HLA-B*35:43	0	0	0	0	1	0	0	0	2	0.154062
EpI_NSP12_79	HLA-I	NSP12	114	122	ISRQRLTKY	9	Yes	NA	NA	NA	HISRQRLTKY, ISRQRLTKY	24094, 28705	HLA-A*26:01, HLA-A*29:02, HLA-A*30:02, HLA-A*01:01	HLA-B*15:01, HLA-B*15:04, HLA-B*35:05, HLA-B*35:11, HLA-B*35:43, HLA-C*07:01, HLA-C*16:01	1	0	2	1	3	0	3	0	2	0.856326
EpI_NSP12_80	HLA-I	NSP12	115	124	SRQRLTKYTM	10	No	NA	NA	NA	NA	NA	NA	HLA-C*07:01	1	0	1	1	1	0	0	0	0	0.220822
EpI_NSP12_81	HLA-I	NSP12	116	124	RQRLTKYTM	9	No	NA	NA	NA	NA	NA	NA	HLA-B*15:01, HLA-B*15:04, HLA-C*16:01	0	0	1	0	1	0	1	0	1	0.279062
EpI_NSP12_82	HLA-I	NSP12	117	124	QRLTKYTM	8	No	NA	NA	NA	NA	NA	NA	HLA-B*08:01, HLA-C*07:01	2	0	2	1	1	0	0	0	0	0.323996
EpI_NSP12_83	HLA-I	NSP12	119	129	LTKYTMADLVY	11	No	NA	NA	NA	NA	NA	NA	HLA-A*01:01	1	0	1	1	1	0	0	0	0	0.220822
EpI_NSP12_84	HLA-I	NSP12	121	131	KYTMADLVYAL	11	Yes	NA	NA	NA	TMADLVYAL, YTMADLVYA	65176, 76120	HLA-A*02:01,HLA-A*02:02,HLA-A*02:03,HLA-A*02:06,HLA-A*68:02	HLA-A*02:04, HLA-A*02:22, HLA-A*24:02	1	0	1	1	1	1	0	1	3	0.67479
EpI_NSP12_85	HLA-I	NSP12	121	129	KYTMADLVY	9	No	NA	NA	NA	NA	NA	NA	HLA-A*29:02, HLA-C*07:01	1	0	1	2	1	0	0	0	0	0.279645
EpI_NSP12_86	HLA-I	NSP12	122	129	YTMADLVY	8	Yes	NA	NA	NA	YTMADLVYA	76120	HLA-A*02:01,HLA-A*02:02,HLA-A*02:03,HLA-A*02:06,HLA-A*68:02	HLA-A*01:01, HLA-A*29:02, HLA-B*15:01, HLA-B*15:04, HLA-B*35:01, HLA-B*35:05, HLA-B*35:11, HLA-B*35:43	2	0	2	3	2	0	3	1	2	1.08182
EpI_NSP12_87	HLA-I	NSP12	122	130	YTMADLVYA	9	Yes	NA	NA	NA	YTMADLVYA	76120	HLA-A*02:01,HLA-A*02:02,HLA-A*02:03,HLA-A*02:06,HLA-A*68:02	HLA-A*02:01, HLA-A*02:04, HLA-A*02:11, HLA-A*02:17, HLA-A*02:22, HLA-A*68:02, HLA-C*03:04, HLA-C*15:03, HLA-C*16:01	1	0	3	1	3	1	1	3	7	1.42537
EpI_NSP12_88	HLA-I	NSP12	122	131	YTMADLVYAL	10	Yes	NA	NA	NA	TMADLVYAL, YTMADLVYA	65176, 76120	HLA-A*02:01,HLA-A*02:02,HLA-A*02:03,HLA-A*02:06,HLA-A*68:02	HLA-A*02:01, HLA-A*02:04, HLA-A*02:11, HLA-A*02:17, HLA-A*02:22, HLA-A*68:02, HLA-B*39:09, HLA-C*01:02, HLA-C*03:04, HLA-C*15:03, HLA-C*16:01	1	0	3	2	4	1	1	3	9	1.63826
EpI_NSP12_89	HLA-I	NSP12	122	132	YTMADLVYALR	11	Yes	NA	NA	NA	TMADLVYAL, TMADLVYALR, YTMADLVYA	65176, 65177, 76120	HLA-A*02:01,HLA-A*02:02,HLA-A*02:03,HLA-A*02:06,HLA-A*68:02, HLA-A*03:01, HLA-A*11:01, HLA-A*31:01, HLA-A*33:01, HLA-A*68:01	HLA-A*11:01, HLA-A*31:01, HLA-A*68:01	2	0	1	2	1	1	1	1	1	0.818931
EpI_NSP12_90	HLA-I	NSP12	123	131	TMADLVYAL	9	Yes	NA	NA	NA	TMADLVYAL, TMADLVYALR	65176, 65177	HLA-A*02:01,HLA-A*02:02,HLA-A*02:03,HLA-A*02:06,HLA-A*68:02, HLA-A*03:01, HLA-A*11:01, HLA-A*31:01, HLA-A*33:01, HLA-A*68:01	HLA-A*02:01, HLA-A*02:04, HLA-A*02:11, HLA-A*02:17, HLA-A*02:22, HLA-A*68:02, HLA-B*15:01, HLA-B*15:04, HLA-B*35:01, HLA-B*35:05, HLA-B*35:11, HLA-B*35:12, HLA-B*35:43, HLA-B*39:05, HLA-B*39:09, HLA-C*01:02, HLA-C*03:04, HLA-C*07:01, HLA-C*15:03, HLA-C*16:01	3	0	5	4	6	1	4	4	13	2.75649
EpI_NSP12_91	HLA-I	NSP12	123	130	TMADLVYA	8	Yes	NA	NA	NA	TMADLVYAL, TMADLVYALR, YTMADLVYA	65176, 65177, 76120	HLA-A*02:01,HLA-A*02:02,HLA-A*02:03,HLA-A*02:06,HLA-A*68:02, HLA-A*03:01, HLA-A*11:01, HLA-A*31:01, HLA-A*33:01, HLA-A*68:01	HLA-A*02:11, HLA-A*02:22	0	0	0	0	0	0	1	1	1	0.28373
EpI_NSP12_92	HLA-I	NSP12	123	132	TMADLVYALR	10	Yes	NA	NA	NA	TMADLVYAL, TMADLVYALR	65176, 65177	HLA-A*02:01,HLA-A*02:02,HLA-A*02:03,HLA-A*02:06,HLA-A*68:02, HLA-A*03:01, HLA-A*11:01, HLA-A*31:01, HLA-A*33:01, HLA-A*68:01	HLA-A*02:22, HLA-A*11:01, HLA-A*31:01, HLA-A*68:01	2	0	1	2	1	1	1	1	2	0.86655
EpI_NSP12_93	HLA-I	NSP12	124	131	MADLVYAL	8	Yes	NA	NA	NA	TMADLVYAL, TMADLVYALR	65176, 65177	HLA-A*02:01,HLA-A*02:02,HLA-A*02:03,HLA-A*02:06,HLA-A*68:02, HLA-A*03:01, HLA-A*11:01, HLA-A*31:01, HLA-A*33:01, HLA-A*68:01	HLA-A*02:22, HLA-B*35:05, HLA-B*35:12, HLA-B*39:09, HLA-C*01:02, HLA-C*03:04, HLA-C*05:01, HLA-C*16:01	1	0	3	2	4	0	1	1	5	1.02556
EpI_NSP12_94	HLA-I	NSP12	124	132	MADLVYALR	9	Yes	NA	NA	NA	TMADLVYALR	65177	HLA-A*03:01, HLA-A*11:01, HLA-A*31:01, HLA-A*33:01, HLA-A*68:01	HLA-A*31:01, HLA-A*68:01	1	0	0	2	1	1	1	1	1	0.715756
EpI_NSP12_95	HLA-I	NSP12	126	134	DLVYALRHF	9	No	NA	NA	NA	NA	NA	NA	HLA-B*35:11, HLA-B*35:43	0	0	0	0	1	0	1	0	1	0.231443
EpI_NSP12_96	HLA-I	NSP12	132	142	RHFDEGNCDTL	11	No	NA	NA	NA	NA	NA	NA	HLA-B*39:05, HLA-B*39:09	0	0	0	1	0	0	0	0	2	0.154062
EpI_NSP12_97	HLA-I	NSP12	133	142	HFDEGNCDTL	10	No	NA	NA	NA	NA	NA	NA	HLA-B*39:05, HLA-B*39:09	0	0	0	1	0	0	0	0	2	0.154062
EpI_NSP12_98	HLA-I	NSP12	140	149	DTLKEILVTY	10	No	NA	NA	NA	NA	NA	NA	HLA-A*68:01, HLA-B*15:04, HLA-B*35:05, HLA-B*35:11, HLA-B*35:43	0	0	0	1	2	1	3	0	1	0.79909
EpI_NSP12_99	HLA-I	NSP12	141	149	TLKEILVTY	9	No	NA	NA	NA	NA	NA	NA	HLA-A*29:02, HLA-B*15:01, HLA-B*15:04, HLA-B*35:05, HLA-B*35:11, HLA-B*35:43, HLA-C*16:01	0	0	1	1	2	0	3	0	2	0.694328
EpI_NSP12_100	HLA-I	NSP12	141	150	TLKEILVTYN	10	No	NA	NA	NA	NA	NA	NA	HLA-B*15:04	0	0	0	0	0	0	1	0	0	0.125
EpI_NSP12_101	HLA-I	NSP12	147	156	VTYNCCDDDY	10	Yes	NA	NA	NA	VTYNCCDDDY	71580	HLA-A*01:01, HLA-A*29:02, HLA-A*30:02	HLA-A*01:01	1	0	1	1	1	0	0	0	0	0.220822
EpI_NSP12_102	HLA-I	NSP12	148	157	TYNCCDDDYF	10	No	NA	NA	NA	NA	NA	NA	HLA-A*24:02	1	0	1	1	1	1	0	1	1	0.579552
EpI_NSP12_103	HLA-I	NSP12	155	165	DYFNKKDWYDF	11	No	NA	NA	NA	NA	NA	NA	HLA-A*23:01, HLA-A*24:02	1	0	2	1	1	1	0	1	1	0.627171
EpI_NSP12_104	HLA-I	NSP12	155	163	DYFNKKDWY	9	No	NA	NA	NA	NA	NA	NA	HLA-C*07:01	1	0	1	1	1	0	0	0	0	0.220822
EpI_NSP12_105	HLA-I	NSP12	156	165	YFNKKDWYDF	10	No	NA	NA	NA	NA	NA	NA	HLA-A*23:01, HLA-A*24:02, HLA-A*29:02	1	0	2	2	1	1	0	1	1	0.685994
EpI_NSP12_106	HLA-I	NSP12	163	173	YDFVENPDILR	11	No	NA	NA	NA	NA	NA	NA	HLA-A*68:01	0	0	0	1	1	1	0	0	0	0.317647
EpI_NSP12_107	HLA-I	NSP12	163	172	YDFVENPDIL	10	No	NA	NA	NA	NA	NA	NA	HLA-B*39:05	0	0	0	0	0	0	0	0	1	0.047619
EpI_NSP12_108	HLA-I	NSP12	164	173	DFVENPDILR	10	No	NA	NA	NA	NA	NA	NA	HLA-A*68:01	0	0	0	1	1	1	0	0	0	0.317647
EpI_NSP12_109	HLA-I	NSP12	164	172	DFVENPDIL	9	No	NA	NA	NA	NA	NA	NA	HLA-B*35:12, HLA-B*39:05, HLA-B*39:09	0	0	0	1	0	0	0	0	3	0.201681
EpI_NSP12_110	HLA-I	NSP12	165	174	FVENPDILRV	10	Yes	NA	NA	NA	VENPDILRV	68304	HLA-B*40:02, HLA-B*44:03, HLA-B*45:01	HLA-A*02:04, HLA-A*02:22, HLA-A*68:02, HLA-C*15:03	0	0	0	0	0	0	0	0	4	0.190476
EpI_NSP12_111	HLA-I	NSP12	165	173	FVENPDILR	9	No	NA	NA	NA	NA	NA	NA	HLA-A*68:01	0	0	0	1	1	1	0	0	0	0.317647
EpI_NSP12_112	HLA-I	NSP12	165	172	FVENPDIL	8	No	NA	NA	NA	NA	NA	NA	HLA-C*05:01	1	0	1	1	1	0	0	0	0	0.220822
EpI_NSP12_113	HLA-I	NSP12	166	175	VENPDILRVY	10	Yes	NA	NA	NA	VENPDILRV	68304	HLA-B*40:02, HLA-B*44:03, HLA-B*45:01	HLA-B*15:01, HLA-B*15:04, HLA-B*44:03	1	0	1	0	1	0	1	0	1	0.334617
EpI_NSP12_114	HLA-I	NSP12	166	174	VENPDILRV	9	Yes	NA	NA	NA	VENPDILRV	68304	HLA-B*40:02, HLA-B*44:03, HLA-B*45:01	HLA-B*39:05	0	0	0	0	0	0	0	0	1	0.047619
EpI_NSP12_115	HLA-I	NSP12	167	175	ENPDILRVY	9	No	NA	NA	NA	NA	NA	NA	HLA-B*35:43	0	0	0	0	1	0	0	0	1	0.106443
EpI_NSP12_116	HLA-I	NSP12	168	175	NPDILRVY	8	No	NA	NA	NA	NA	NA	NA	HLA-B*35:05, HLA-B*35:11, HLA-B*35:12, HLA-B*35:43	0	0	0	0	1	0	2	0	2	0.404062
EpI_NSP12_117	HLA-I	NSP12	168	176	NPDILRVYA	9	No	NA	NA	NA	NA	NA	NA	HLA-B*35:05, HLA-B*35:12	0	0	0	0	0	0	1	0	1	0.172619
EpI_NSP12_118	HLA-I	NSP12	171	178	ILRVYANL	8	No	NA	NA	NA	NA	NA	NA	HLA-B*08:01	1	0	1	0	0	0	0	0	0	0.103175
EpI_NSP12_119	HLA-I	NSP12	173	182	RVYANLGERV	10	Yes	NA	NA	NA	RVYANLGER	56455	HLA-A*03:01, HLA-A*11:01, HLA-A*31:01, HLA-A*68:01	HLA-A*02:04, HLA-C*15:03	0	0	0	0	0	0	0	0	2	0.0952381
EpI_NSP12_120	HLA-I	NSP12	173	181	RVYANLGER	9	Yes	NA	NA	NA	RVYANLGER	56455	HLA-A*03:01, HLA-A*11:01, HLA-A*31:01, HLA-A*68:01	HLA-A*03:01, HLA-A*11:01, HLA-A*31:01, HLA-A*68:01	3	0	2	3	2	2	1	1	1	1.23975
EpI_NSP12_121	HLA-I	NSP12	173	183	RVYANLGERVR	11	Yes	NA	NA	NA	RVYANLGER	56455	HLA-A*03:01, HLA-A*11:01, HLA-A*31:01, HLA-A*68:01	HLA-A*31:01	1	0	0	1	0	0	1	1	1	0.398109
EpI_NSP12_122	HLA-I	NSP12	174	182	VYANLGERV	9	No	NA	NA	NA	NA	NA	NA	HLA-A*24:02	1	0	1	1	1	1	0	1	1	0.579552
EpI_NSP12_123	HLA-I	NSP12	175	183	YANLGERVR	9	No	NA	NA	NA	NA	NA	NA	HLA-A*68:01	0	0	0	1	1	1	0	0	0	0.317647
EpI_NSP12_124	HLA-I	NSP12	177	185	NLGERVRQA	9	No	NA	NA	NA	NA	NA	NA	HLA-A*02:22	0	0	0	0	0	0	0	0	1	0.047619
EpI_NSP12_125	HLA-I	NSP12	177	186	NLGERVRQAL	10	No	NA	NA	NA	NA	NA	NA	HLA-B*08:01	1	0	1	0	0	0	0	0	0	0.103175
EpI_NSP12_126	HLA-I	NSP12	179	186	GERVRQAL	8	No	NA	NA	NA	NA	NA	NA	HLA-B*40:02	0	0	0	0	1	1	0	0	1	0.306443
EpI_NSP12_127	HLA-I	NSP12	179	187	GERVRQALL	9	No	NA	NA	NA	NA	NA	NA	HLA-B*40:02	0	0	0	0	1	1	0	0	1	0.306443
EpI_NSP12_128	HLA-I	NSP12	181	188	RVRQALLK	8	No	NA	NA	NA	NA	NA	NA	HLA-A*03:01	1	0	1	1	1	1	0	0	0	0.420822
EpI_NSP12_129	HLA-I	NSP12	181	189	RVRQALLKT	9	No	NA	NA	NA	NA	NA	NA	HLA-B*15:04	0	0	0	0	0	0	1	0	0	0.125
EpI_NSP12_130	HLA-I	NSP12	182	190	VRQALLKTV	9	No	NA	NA	NA	NA	NA	NA	HLA-C*06:02, HLA-C*07:01	2	0	2	2	2	0	0	0	0	0.441643
EpI_NSP12_131	HLA-I	NSP12	183	192	RQALLKTVQF	10	No	NA	NA	NA	NA	NA	NA	HLA-B*15:01, HLA-B*15:04	0	0	0	0	0	0	1	0	1	0.172619
EpI_NSP12_132	HLA-I	NSP12	183	191	RQALLKTVQ	9	No	NA	NA	NA	NA	NA	NA	HLA-B*15:04	0	0	0	0	0	0	1	0	0	0.125
EpI_NSP12_133	HLA-I	NSP12	184	192	QALLKTVQF	9	No	NA	NA	NA	NA	NA	NA	HLA-B*35:01, HLA-B*35:05, HLA-B*35:11, HLA-B*35:12, HLA-B*35:43, HLA-C*01:02, HLA-C*03:04, HLA-C*16:01	1	0	3	1	4	0	2	2	4	1.15523
EpI_NSP12_134	HLA-I	NSP12	185	193	ALLKTVQFC	9	No	NA	NA	NA	NA	NA	NA	HLA-A*02:04	0	0	0	0	0	0	0	0	1	0.047619
EpI_NSP12_135	HLA-I	NSP12	188	197	KTVQFCDAMR	10	Yes	NA	NA	NA	KTVQFCDAMR	33905	HLA-A*03:01, HLA-A*11:01, HLA-A*31:01, HLA-A*33:01, HLA-A*68:01	HLA-A*31:01, HLA-A*68:01	1	0	0	2	1	1	1	1	1	0.715756
EpI_NSP12_136	HLA-I	NSP12	188	196	KTVQFCDAM	9	Yes	NA	NA	NA	KTVQFCDAMR	33905	HLA-A*03:01, HLA-A*11:01, HLA-A*31:01, HLA-A*33:01, HLA-A*68:01	HLA-C*16:01	0	0	1	0	1	0	0	0	0	0.106443
EpI_NSP12_137	HLA-I	NSP12	189	197	TVQFCDAMR	9	Yes	NA	NA	NA	KTVQFCDAMR	33905	HLA-A*03:01, HLA-A*11:01, HLA-A*31:01, HLA-A*33:01, HLA-A*68:01	HLA-A*31:01, HLA-A*68:01	1	0	0	2	1	1	1	1	1	0.715756
EpI_NSP12_138	HLA-I	NSP12	194	204	DAMRNAGIVGV	11	No	NA	NA	NA	NA	NA	NA	HLA-A*68:02	0	0	0	0	0	0	0	0	1	0.047619
EpI_NSP12_139	HLA-I	NSP12	194	202	DAMRNAGIV	9	No	NA	NA	NA	NA	NA	NA	HLA-B*35:12	0	0	0	0	0	0	0	0	1	0.047619
EpI_NSP12_140	HLA-I	NSP12	195	204	AMRNAGIVGV	10	No	NA	NA	NA	NA	NA	NA	HLA-A*02:01, HLA-A*02:04, HLA-A*02:11, HLA-A*02:22, HLA-B*15:04, HLA-C*07:01	2	0	2	2	2	1	2	2	3	1.25672
EpI_NSP12_141	HLA-I	NSP12	195	203	AMRNAGIVG	9	No	NA	NA	NA	NA	NA	NA	HLA-B*15:01, HLA-B*15:04	0	0	0	0	0	0	1	0	1	0.172619
EpI_NSP12_142	HLA-I	NSP12	195	202	AMRNAGIV	8	No	NA	NA	NA	NA	NA	NA	HLA-B*15:04	0	0	0	0	0	0	1	0	0	0.125
EpI_NSP12_143	HLA-I	NSP12	196	204	MRNAGIVGV	9	No	NA	NA	NA	NA	NA	NA	HLA-B*39:05, HLA-B*39:09, HLA-C*06:02, HLA-C*07:01	2	0	2	3	2	0	0	0	2	0.595705
EpI_NSP12_144	HLA-I	NSP12	196	205	MRNAGIVGVL	10	No	NA	NA	NA	NA	NA	NA	HLA-B*39:05, HLA-B*39:09, HLA-C*07:01	1	0	1	2	1	0	0	0	2	0.374883
EpI_NSP12_145	HLA-I	NSP12	197	205	RNAGIVGVL	9	No	NA	NA	NA	NA	NA	NA	HLA-B*15:04, HLA-B*39:05, HLA-B*39:09, HLA-C*03:04, HLA-C*16:01	0	0	2	1	2	0	1	1	3	0.650677
EpI_NSP12_146	HLA-I	NSP12	199	207	AGIVGVLTL	9	No	NA	NA	NA	NA	NA	NA	HLA-B*15:04, HLA-B*39:05, HLA-B*39:09, HLA-C*01:02, HLA-C*03:04, HLA-C*07:01, HLA-C*15:03, HLA-C*16:01	1	0	3	2	4	0	1	1	5	1.02556
EpI_NSP12_147	HLA-I	NSP12	215	223	NWYDFGDFI	9	No	NA	NA	NA	NA	NA	NA	HLA-A*02:04, HLA-A*23:01, HLA-A*24:02, HLA-C*07:01	2	0	3	2	2	1	0	1	2	0.895612
EpI_NSP12_148	HLA-I	NSP12	215	222	NWYDFGDF	8	No	NA	NA	NA	NA	NA	NA	HLA-A*23:01, HLA-A*24:02	1	0	2	1	1	1	0	1	1	0.627171
EpI_NSP12_149	HLA-I	NSP12	223	231	IQTTPGSGV	9	No	NA	NA	NA	NA	NA	NA	HLA-B*15:04	0	0	0	0	0	0	1	0	0	0.125
EpI_NSP12_150	HLA-I	NSP12	224	233	QTTPGSGVPV	10	No	NA	NA	NA	NA	NA	NA	HLA-A*68:02	0	0	0	0	0	0	0	0	1	0.047619
EpI_NSP12_151	HLA-I	NSP12	225	233	TTPGSGVPV	9	No	NA	NA	NA	NA	NA	NA	HLA-A*68:02, HLA-C*01:02, HLA-C*03:04, HLA-C*15:03	0	0	1	0	2	0	0	1	4	0.466853
EpI_NSP12_152	HLA-I	NSP12	225	234	TTPGSGVPVV	10	No	NA	NA	NA	NA	NA	NA	HLA-A*68:02	0	0	0	0	0	0	0	0	1	0.047619
EpI_NSP12_153	HLA-I	NSP12	226	233	TPGSGVPV	8	No	NA	NA	NA	NA	NA	NA	HLA-B*07:02	1	0	1	1	0	0	0	0	0	0.161998
EpI_NSP12_154	HLA-I	NSP12	226	234	TPGSGVPVV	9	No	NA	NA	NA	NA	NA	NA	HLA-B*35:05, HLA-B*35:11, HLA-B*35:12, HLA-B*35:43	0	0	0	0	1	0	2	0	2	0.404062
EpI_NSP12_155	HLA-I	NSP12	228	237	GSGVPVVDSY	10	No	NA	NA	NA	NA	NA	NA	HLA-B*15:01, HLA-B*15:04	0	0	0	0	0	0	1	0	1	0.172619
EpI_NSP12_156	HLA-I	NSP12	229	237	SGVPVVDSY	9	No	NA	NA	NA	NA	NA	NA	HLA-B*15:01, HLA-B*15:04, HLA-B*35:01, HLA-B*35:05, HLA-B*35:11, HLA-B*35:43, HLA-C*16:01	1	0	2	1	2	0	3	1	2	0.908613
EpI_NSP12_157	HLA-I	NSP12	229	238	SGVPVVDSYY	10	No	NA	NA	NA	NA	NA	NA	HLA-B*15:01, HLA-B*15:04, HLA-B*35:05, HLA-B*35:43	0	0	0	0	1	0	2	0	2	0.404062
EpI_NSP12_158	HLA-I	NSP12	230	238	GVPVVDSYY	9	No	NA	NA	NA	NA	NA	NA	HLA-A*29:02, HLA-B*15:04, HLA-B*35:43	0	0	0	1	1	0	1	0	1	0.290266
EpI_NSP12_159	HLA-I	NSP12	231	238	VPVVDSYY	8	No	NA	NA	NA	NA	NA	NA	HLA-B*35:01, HLA-B*35:05, HLA-B*35:11, HLA-B*35:43	1	0	1	1	1	0	2	1	1	0.629552
EpI_NSP12_160	HLA-I	NSP12	231	240	VPVVDSYYSL	10	No	NA	NA	NA	NA	NA	NA	HLA-B*35:05, HLA-B*35:11, HLA-B*35:12	0	0	0	0	0	0	2	0	1	0.297619
EpI_NSP12_161	HLA-I	NSP12	233	241	VVDSYYSLL	9	No	NA	NA	NA	NA	NA	NA	HLA-A*02:04, HLA-A*02:11, HLA-A*02:22, HLA-B*35:12, HLA-C*01:02, HLA-C*03:04, HLA-C*04:01, HLA-C*05:01, HLA-C*07:01, HLA-C*15:02, HLA-C*15:03, HLA-C*16:01	3	0	6	3	6	0	1	3	7	1.77346
EpI_NSP12_162	HLA-I	NSP12	233	240	VVDSYYSL	8	No	NA	NA	NA	NA	NA	NA	HLA-C*01:02, HLA-C*04:01, HLA-C*05:01	2	0	2	2	3	0	0	1	2	0.706816
EpI_NSP12_163	HLA-I	NSP12	236	244	SYYSLLMPI	9	No	NA	NA	NA	NA	NA	NA	HLA-A*23:01, HLA-A*24:02, HLA-C*06:02, HLA-C*07:02	3	0	4	3	3	1	0	2	2	1.22754
EpI_NSP12_164	HLA-I	NSP12	236	245	SYYSLLMPIL	10	No	NA	NA	NA	NA	NA	NA	HLA-A*23:01, HLA-A*24:02	1	0	2	1	1	1	0	1	1	0.627171
EpI_NSP12_165	HLA-I	NSP12	237	245	YYSLLMPIL	9	No	NA	NA	NA	NA	NA	NA	HLA-A*24:02, HLA-C*07:01	2	0	2	2	2	1	0	1	1	0.800373
EpI_NSP12_166	HLA-I	NSP12	237	247	YYSLLMPILTL	11	No	NA	NA	NA	NA	NA	NA	HLA-A*24:02	1	0	1	1	1	1	0	1	1	0.579552
EpI_NSP12_167	HLA-I	NSP12	238	247	YSLLMPILTL	10	No	NA	NA	NA	NA	NA	NA	HLA-A*02:01, HLA-A*02:04, HLA-A*02:11, HLA-C*01:02, HLA-C*15:03	1	0	1	1	2	1	1	2	4	1.01734
EpI_NSP12_168	HLA-I	NSP12	239	247	SLLMPILTL	9	No	NA	NA	NA	NA	NA	NA	HLA-A*02:01, HLA-A*02:04, HLA-A*02:11, HLA-A*02:17, HLA-A*02:22, HLA-B*15:04, HLA-B*39:05, HLA-B*39:09, HLA-C*01:02, HLA-C*03:04, HLA-C*07:01, HLA-C*15:03, HLA-C*16:01	2	0	4	3	5	1	2	3	9	1.98408
EpI_NSP12_169	HLA-I	NSP12	239	248	SLLMPILTLT	10	Yes	NA	NA	NA	LLMPILTLT	37583	HLA-A*02:01,HLA-A*02:02,HLA-A*02:03,HLA-A*02:06,HLA-A*68:02	HLA-A*02:04, HLA-A*02:22	0	0	0	0	0	0	0	0	2	0.0952381
EpI_NSP12_170	HLA-I	NSP12	240	247	LLMPILTL	8	Yes	NA	NA	NA	LLMPILTLT, LLMPILTLTR	37583, 37584	HLA-A*02:01,HLA-A*02:02,HLA-A*02:03,HLA-A*02:06,HLA-A*68:02, HLA-A*03:01, HLA-A*11:01, HLA-A*31:01, HLA-A*33:01, HLA-A*68:01	HLA-A*02:01, HLA-A*02:04, HLA-A*02:11, HLA-A*02:22, HLA-B*08:01, HLA-C*01:02, HLA-C*03:04, HLA-C*15:03, HLA-C*16:01	2	0	4	1	4	1	1	3	6	1.53975
EpI_NSP12_171	HLA-I	NSP12	240	248	LLMPILTLT	9	Yes	NA	NA	NA	LLMPILTLT, LLMPILTLTR	37583, 37584	HLA-A*02:01,HLA-A*02:02,HLA-A*02:03,HLA-A*02:06,HLA-A*68:02, HLA-A*03:01, HLA-A*11:01, HLA-A*31:01, HLA-A*33:01, HLA-A*68:01	HLA-A*02:01, HLA-A*02:04, HLA-A*02:11, HLA-A*02:17, HLA-A*02:22	1	0	1	1	1	1	1	2	4	0.95852
EpI_NSP12_172	HLA-I	NSP12	240	249	LLMPILTLTR	10	Yes	NA	NA	NA	LLMPILTLT, LLMPILTLTR, LMPILTLTR	37583, 37584, 38090	HLA-A*02:01,HLA-A*02:02,HLA-A*02:03,HLA-A*02:06,HLA-A*68:02, HLA-A*03:01, HLA-A*11:01, HLA-A*31:01, HLA-A*33:01, HLA-A*68:01	HLA-A*03:01, HLA-A*11:01, HLA-A*31:01, HLA-A*68:01	3	0	2	3	2	2	1	1	1	1.23975
EpI_NSP12_173	HLA-I	NSP12	241	249	LMPILTLTR	9	Yes	NA	NA	NA	LLMPILTLTR, LMPILTLTR	37584, 38090	HLA-A*02:01,HLA-A*02:02,HLA-A*02:03,HLA-A*02:06,HLA-A*68:02, HLA-A*03:01, HLA-A*11:01, HLA-A*31:01, HLA-A*68:01	HLA-A*31:01, HLA-A*68:01	1	0	0	2	1	1	1	1	1	0.715756
EpI_NSP12_174	HLA-I	NSP12	242	251	MPILTLTRAL	10	Yes	NA	NA	NA	MPILTLTRA, MPILTLTRAL	42281, 42282	HLA-B*07:02, HLA-B*35:01, HLA-B*51:01, HLA-B*54:01, Patr-B*13:01	HLA-B*07:02, HLA-B*35:01, HLA-B*35:05, HLA-B*35:11, HLA-B*35:12, HLA-B*35:43	2	0	2	2	1	0	2	1	2	0.839169
EpI_NSP12_175	HLA-I	NSP12	242	250	MPILTLTRA	9	Yes	NA	NA	NA	MPILTLTRA, MPILTLTRAL	42281, 42282	HLA-B*07:02, HLA-B*35:01, HLA-B*51:01, HLA-B*54:01, Patr-B*13:01	HLA-B*35:01, HLA-B*35:05, HLA-B*35:11, HLA-B*35:12, HLA-B*35:43	1	0	1	1	1	0	2	1	2	0.677171
EpI_NSP12_176	HLA-I	NSP12	245	253	LTLTRALTA	9	No	NA	NA	NA	NA	NA	NA	HLA-C*15:03	0	0	0	0	0	0	0	0	1	0.047619
EpI_NSP12_177	HLA-I	NSP12	249	257	RALTAESHV	9	No	NA	NA	NA	NA	NA	NA	HLA-C*03:04, HLA-C*15:03	0	0	1	0	1	0	0	1	2	0.312792
EpI_NSP12_178	HLA-I	NSP12	253	261	AESHVDTDL	9	No	NA	NA	NA	NA	NA	NA	HLA-B*39:05, HLA-B*40:02, HLA-B*44:03	1	0	1	0	2	1	0	0	2	0.51606
EpI_NSP12_179	HLA-I	NSP12	254	263	ESHVDTDLTK	10	No	NA	NA	NA	NA	NA	NA	HLA-A*68:01	0	0	0	1	1	1	0	0	0	0.317647
EpI_NSP12_180	HLA-I	NSP12	256	265	HVDTDLTKPY	10	No	NA	NA	NA	NA	NA	NA	HLA-A*01:01, HLA-B*35:01, HLA-B*35:05, HLA-B*35:11, HLA-B*35:43	2	0	2	2	2	0	2	1	1	0.850373
EpI_NSP12_181	HLA-I	NSP12	258	265	DTDLTKPY	8	No	NA	NA	NA	NA	NA	NA	HLA-A*01:01	1	0	1	1	1	0	0	0	0	0.220822
EpI_NSP12_182	HLA-I	NSP12	258	267	DTDLTKPYIK	10	No	NA	NA	NA	NA	NA	NA	HLA-A*68:01	0	0	0	1	1	1	0	0	0	0.317647
EpI_NSP12_183	HLA-I	NSP12	262	270	TKPYIKWDL	9	No	NA	NA	NA	NA	NA	NA	HLA-B*39:09	0	0	0	1	0	0	0	0	1	0.106443
EpI_NSP12_184	HLA-I	NSP12	263	271	KPYIKWDLL	9	No	NA	NA	NA	NA	NA	NA	HLA-B*07:02, HLA-B*35:05, HLA-B*35:11, HLA-B*35:12, HLA-B*39:09, HLA-C*01:02, HLA-C*03:04, HLA-C*16:01	1	0	3	2	3	0	2	1	4	1.04412
EpI_NSP12_185	HLA-I	NSP12	263	273	KPYIKWDLLKY	11	No	NA	NA	NA	NA	NA	NA	HLA-B*35:05	0	0	0	0	0	0	1	0	0	0.125
EpI_NSP12_186	HLA-I	NSP12	264	271	PYIKWDLL	8	No	NA	NA	NA	NA	NA	NA	HLA-A*23:01, HLA-A*24:02	1	0	2	1	1	1	0	1	1	0.627171
EpI_NSP12_187	HLA-I	NSP12	264	273	PYIKWDLLKY	10	No	NA	NA	NA	NA	NA	NA	HLA-A*29:02	0	0	0	1	0	0	0	0	0	0.0588235
EpI_NSP12_188	HLA-I	NSP12	265	273	YIKWDLLKY	9	No	NA	NA	NA	NA	NA	NA	HLA-A*29:02, HLA-B*15:01, HLA-B*15:04, HLA-B*35:05, HLA-B*35:11, HLA-B*35:43	0	0	0	1	1	0	3	0	2	0.587885
EpI_NSP12_189	HLA-I	NSP12	267	275	KWDLLKYDF	9	Yes	NA	NA	NA	KWDLLKYDF	34288	HLA-A*29:02, HLA-A*30:02	HLA-A*23:01, HLA-A*24:02, HLA-A*29:02	1	0	2	2	1	1	0	1	1	0.685994
EpI_NSP12_190	HLA-I	NSP12	270	279	LLKYDFTEER	10	No	NA	NA	NA	NA	NA	NA	HLA-A*31:01, HLA-A*68:01	1	0	0	2	1	1	1	1	1	0.715756
EpI_NSP12_191	HLA-I	NSP12	272	279	KYDFTEER	8	No	NA	NA	NA	NA	NA	NA	HLA-A*31:01	1	0	0	1	0	0	1	1	1	0.398109
EpI_NSP12_192	HLA-I	NSP12	272	280	KYDFTEERL	9	No	NA	NA	NA	NA	NA	NA	HLA-C*07:01	1	0	1	1	1	0	0	0	0	0.220822
EpI_NSP12_193	HLA-I	NSP12	275	283	FTEERLKLF	9	No	NA	NA	NA	NA	NA	NA	HLA-B*35:05, HLA-B*35:11, HLA-B*35:43, HLA-C*01:02, HLA-C*07:01, HLA-C*15:03, HLA-C*16:01	1	0	2	1	4	0	2	0	3	0.837768
EpI_NSP12_194	HLA-I	NSP12	276	283	TEERLKLF	8	No	NA	NA	NA	NA	NA	NA	HLA-B*18:01	1	0	0	1	0	0	0	0	0	0.114379
EpI_NSP12_195	HLA-I	NSP12	277	287	EERLKLFDRYF	11	No	NA	NA	NA	NA	NA	NA	HLA-B*44:03	1	0	1	0	1	0	0	0	0	0.161998
EpI_NSP12_196	HLA-I	NSP12	278	286	ERLKLFDRY	9	No	NA	NA	NA	NA	NA	NA	HLA-C*07:01	1	0	1	1	1	0	0	0	0	0.220822
EpI_NSP12_197	HLA-I	NSP12	278	287	ERLKLFDRYF	10	No	NA	NA	NA	NA	NA	NA	HLA-C*07:01	1	0	1	1	1	0	0	0	0	0.220822
EpI_NSP12_198	HLA-I	NSP12	279	288	RLKLFDRYFK	10	No	NA	NA	NA	NA	NA	NA	HLA-A*03:01, HLA-A*11:01, HLA-A*31:01	3	0	2	2	1	1	1	1	1	0.922106
EpI_NSP12_199	HLA-I	NSP12	279	286	RLKLFDRY	8	No	NA	NA	NA	NA	NA	NA	HLA-B*15:01, HLA-B*15:04	0	0	0	0	0	0	1	0	1	0.172619
EpI_NSP12_200	HLA-I	NSP12	279	287	RLKLFDRYF	9	No	NA	NA	NA	NA	NA	NA	HLA-B*15:01, HLA-B*15:04	0	0	0	0	0	0	1	0	1	0.172619
EpI_NSP12_201	HLA-I	NSP12	280	289	LKLFDRYFKY	10	No	NA	NA	NA	NA	NA	NA	HLA-A*29:02	0	0	0	1	0	0	0	0	0	0.0588235
EpI_NSP12_202	HLA-I	NSP12	281	289	KLFDRYFKY	9	No	NA	NA	NA	NA	NA	NA	HLA-A*02:04, HLA-A*02:11, HLA-A*03:01, HLA-A*11:01, HLA-A*29:02, HLA-A*31:01, HLA-B*15:01, HLA-B*15:04, HLA-B*35:05, HLA-B*35:11, HLA-B*35:43, HLA-C*07:01, HLA-C*15:03, HLA-C*16:01	4	0	4	4	4	1	5	2	5	2.1686
EpI_NSP12_203	HLA-I	NSP12	281	288	KLFDRYFK	8	No	NA	NA	NA	NA	NA	NA	HLA-A*03:01, HLA-A*11:01, HLA-A*31:01	3	0	2	2	1	1	1	1	1	0.922106
EpI_NSP12_204	HLA-I	NSP12	282	290	LFDRYFKYW	9	No	NA	NA	NA	NA	NA	NA	HLA-A*23:01	0	0	1	0	0	0	0	0	0	0.047619
EpI_NSP12_205	HLA-I	NSP12	282	289	LFDRYFKY	8	Yes	NA	NA	NA	CLFDRYFKY	6554	HLA-A*03:01, HLA-A*11:01, HLA-A*31:01, HLA-A*33:01, HLA-A*68:01	HLA-A*29:02	0	0	0	1	0	0	0	0	0	0.0588235
EpI_NSP12_206	HLA-I	NSP12	285	294	RYFKYWDQTY	10	Yes	NA	NA	NA	RYFKYWDQTY	56531	HLA-A*23:01, HLA-A*24:02, HLA-A*29:02, HLA-A*30:02	HLA-A*23:01, HLA-A*24:02, HLA-A*29:02, HLA-C*07:01	2	0	3	3	2	1	0	1	1	0.906816
EpI_NSP12_207	HLA-I	NSP12	286	294	YFKYWDQTY	9	Yes	NA	NA	NA	RYFKYWDQTY	56531	HLA-A*23:01, HLA-A*24:02, HLA-A*29:02, HLA-A*30:02	HLA-A*29:02, HLA-B*15:01, HLA-B*15:04, HLA-B*35:05, HLA-B*35:11, HLA-B*35:43, HLA-C*06:02, HLA-C*07:01	2	0	2	3	3	0	3	0	2	1.02953
EpI_NSP12_208	HLA-I	NSP12	286	295	YFKYWDQTYH	10	No	NA	NA	NA	NA	NA	NA	HLA-A*29:02	0	0	0	1	0	0	0	0	0	0.0588235
EpI_NSP12_209	HLA-I	NSP12	288	296	KYWDQTYHP	9	No	NA	NA	NA	NA	NA	NA	HLA-A*23:01	0	0	1	0	0	0	0	0	0	0.047619
EpI_NSP12_210	HLA-I	NSP12	293	302	TYHPNCVNCL	10	No	NA	NA	NA	NA	NA	NA	HLA-A*24:02	1	0	1	1	1	1	0	1	1	0.579552
EpI_NSP12_211	HLA-I	NSP12	294	302	YHPNCVNCL	9	No	NA	NA	NA	NA	NA	NA	HLA-B*39:05, HLA-B*39:09	0	0	0	1	0	0	0	0	2	0.154062
EpI_NSP12_212	HLA-I	NSP12	295	302	HPNCVNCL	8	No	NA	NA	NA	NA	NA	NA	HLA-B*35:12	0	0	0	0	0	0	0	0	1	0.047619
EpI_NSP12_213	HLA-I	NSP12	307	315	ILHCANFNV	9	Yes	NA	NA	NA	ILHCANFNV	27089	HLA-A*02:01,HLA-A*02:02,HLA-A*02:03,HLA-A*02:06,HLA-A*68:02, HLA-A*31:01,HLA-A*69:01	HLA-A*02:01, HLA-A*02:04, HLA-A*02:11, HLA-A*02:17, HLA-A*02:22	1	0	1	1	1	1	1	2	4	0.95852
EpI_NSP12_214	HLA-I	NSP12	308	316	LHCANFNVL	9	No	NA	NA	NA	NA	NA	NA	HLA-B*39:05, HLA-B*39:09	0	0	0	1	0	0	0	0	2	0.154062
EpI_NSP12_215	HLA-I	NSP12	308	317	LHCANFNVLF	10	No	NA	NA	NA	NA	NA	NA	HLA-B*39:05	0	0	0	0	0	0	0	0	1	0.047619
EpI_NSP12_216	HLA-I	NSP12	309	317	HCANFNVLF	9	No	NA	NA	NA	NA	NA	NA	HLA-B*35:01, HLA-B*35:05, HLA-B*35:11, HLA-B*35:43	1	0	1	1	1	0	2	1	1	0.629552
EpI_NSP12_217	HLA-I	NSP12	312	321	NFNVLFSTVF	10	No	NA	NA	NA	NA	NA	NA	HLA-A*23:01, HLA-A*24:02	1	0	2	1	1	1	0	1	1	0.627171
EpI_NSP12_218	HLA-I	NSP12	316	326	LFSTVFPPTSF	11	No	NA	NA	NA	NA	NA	NA	HLA-A*24:02	1	0	1	1	1	1	0	1	1	0.579552
EpI_NSP12_219	HLA-I	NSP12	317	326	FSTVFPPTSF	10	No	NA	NA	NA	NA	NA	NA	HLA-B*15:01, HLA-B*35:43	0	0	0	0	1	0	0	0	2	0.154062
EpI_NSP12_220	HLA-I	NSP12	318	326	STVFPPTSF	9	No	NA	NA	NA	NA	NA	NA	HLA-B*15:01, HLA-B*15:04, HLA-B*35:05, HLA-B*35:11, HLA-B*35:43, HLA-C*01:02, HLA-C*03:04, HLA-C*07:01, HLA-C*15:03, HLA-C*16:01	1	0	3	1	5	0	3	1	5	1.27556
EpI_NSP12_221	HLA-I	NSP12	319	327	TVFPPTSFG	9	No	NA	NA	NA	NA	NA	NA	HLA-A*68:02	0	0	0	0	0	0	0	0	1	0.047619
EpI_NSP12_222	HLA-I	NSP12	319	329	TVFPPTSFGPL	11	Yes	NA	NA	NA	FPPTSFGPL	17354	HLA-B*07:02, HLA-B*35:01, HLA-A*11:01, HLA-A*69:01, HLA-B*15:42, HLA-B*45:06, HLA-B*51:01, HLA-B*54:01, HLA-C*04:01, HLA-C*14:02	HLA-A*68:02	0	0	0	0	0	0	0	0	1	0.047619
EpI_NSP12_223	HLA-I	NSP12	319	326	TVFPPTSF	8	No	NA	NA	NA	NA	NA	NA	HLA-B*15:01, HLA-B*15:04, HLA-B*35:05, HLA-B*35:11, HLA-B*35:43, HLA-C*01:02, HLA-C*03:04, HLA-C*16:01	0	0	2	0	4	0	3	1	4	1.00712
EpI_NSP12_224	HLA-I	NSP12	320	329	VFPPTSFGPL	10	Yes	NA	NA	NA	FPPTSFGPL	17354	HLA-B*07:02, HLA-B*35:01, HLA-A*11:01, HLA-A*69:01, HLA-B*15:42, HLA-B*45:06, HLA-B*51:01, HLA-B*54:01, HLA-C*04:01, HLA-C*14:02	HLA-A*24:02	1	0	1	1	1	1	0	1	1	0.579552
EpI_NSP12_225	HLA-I	NSP12	321	329	FPPTSFGPL	9	Yes	NA	NA	NA	FPPTSFGPL, FPPTSFGPLV	17354, 17355	HLA-B*07:02, HLA-B*35:01, HLA-A*11:01, HLA-A*69:01, HLA-B*15:42, HLA-B*45:06, HLA-B*51:01, HLA-B*54:01, HLA-C*04:01, HLA-C*14:02, HLA-B*53:01	HLA-B*07:02, HLA-B*35:01, HLA-B*35:05, HLA-B*35:11, HLA-B*35:12, HLA-B*35:43, HLA-B*39:09, HLA-C*01:02, HLA-C*03:04	2	0	3	3	3	0	2	2	5	1.31723
EpI_NSP12_226	HLA-I	NSP12	321	330	FPPTSFGPLV	10	Yes	NA	NA	NA	FPPTSFGPL, FPPTSFGPLV	17354, 17355	HLA-B*07:02, HLA-B*35:01, HLA-A*11:01, HLA-A*69:01, HLA-B*15:42, HLA-B*45:06, HLA-B*51:01, HLA-B*54:01, HLA-C*04:01, HLA-C*14:02, HLA-B*53:01	HLA-B*35:12	0	0	0	0	0	0	0	0	1	0.047619
EpI_NSP12_227	HLA-I	NSP12	322	330	PPTSFGPLV	9	Yes	NA	NA	NA	FPPTSFGPLV	17355	HLA-B*07:02, HLA-B*53:01, HLAB*54:01	HLA-B*35:12	0	0	0	0	0	0	0	0	1	0.047619
EpI_NSP12_228	HLA-I	NSP12	323	332	PTSFGPLVRK	10	Yes	NA	NA	NA	TSFGPLVRK	66198	HLA-A*03:01, HLA-A*11:01, HLA-A*31:01, HLA-A*68:01	HLA-A*03:01, HLA-A*11:01, HLA-A*68:01	2	0	2	2	2	2	0	0	0	0.841643
EpI_NSP12_229	HLA-I	NSP12	323	331	PTSFGPLVR	9	No	NA	NA	NA	NA	NA	NA	HLA-A*68:01	0	0	0	1	1	1	0	0	0	0.317647
EpI_NSP12_230	HLA-I	NSP12	324	332	TSFGPLVRK	9	Yes	NA	NA	NA	TSFGPLVRK	66198	HLA-A*03:01, HLA-A*11:01, HLA-A*31:01, HLA-A*68:01	HLA-A*03:01, HLA-A*11:01, HLA-A*31:01, HLA-A*68:01	3	0	2	3	2	2	1	1	1	1.23975
EpI_NSP12_231	HLA-I	NSP12	324	331	TSFGPLVR	8	Yes	NA	NA	NA	TSFGPLVRK	66198	HLA-A*03:01, HLA-A*11:01, HLA-A*31:01, HLA-A*68:01	HLA-A*31:01, HLA-A*68:01	1	0	0	2	1	1	1	1	1	0.715756
EpI_NSP12_232	HLA-I	NSP12	324	333	TSFGPLVRKI	10	Yes	NA	NA	NA	TSFGPLVRK	66198	HLA-A*03:01, HLA-A*11:01, HLA-A*31:01, HLA-A*68:01	HLA-A*68:02, HLA-C*15:03	0	0	0	0	0	0	0	0	2	0.0952381
EpI_NSP12_233	HLA-I	NSP12	325	332	SFGPLVRK	8	Yes	NA	NA	NA	TSFGPLVRK	66198	HLA-A*03:01, HLA-A*11:01, HLA-A*31:01, HLA-A*68:01	HLA-A*11:01	1	0	1	0	0	0	0	0	0	0.103175
EpI_NSP12_234	HLA-I	NSP12	325	334	SFGPLVRKIF	10	No	NA	NA	NA	NA	NA	NA	HLA-A*23:01, HLA-A*24:02	1	0	2	1	1	1	0	1	1	0.627171
EpI_NSP12_235	HLA-I	NSP12	325	333	SFGPLVRKI	9	No	NA	NA	NA	NA	NA	NA	HLA-C*07:01	1	0	1	1	1	0	0	0	0	0.220822
EpI_NSP12_236	HLA-I	NSP12	330	338	VRKIFVDGV	9	No	NA	NA	NA	NA	NA	NA	HLA-C*07:01	1	0	1	1	1	0	0	0	0	0.220822
EpI_NSP12_237	HLA-I	NSP12	331	341	RKIFVDGVPFV	11	No	NA	NA	NA	NA	NA	NA	HLA-A*02:04	0	0	0	0	0	0	0	0	1	0.047619
EpI_NSP12_238	HLA-I	NSP12	331	340	RKIFVDGVPF	10	No	NA	NA	NA	NA	NA	NA	HLA-B*15:01	0	0	0	0	0	0	0	0	1	0.047619
EpI_NSP12_239	HLA-I	NSP12	332	341	KIFVDGVPFV	10	No	NA	NA	NA	NA	NA	NA	HLA-A*02:01, HLA-A*02:04, HLA-A*02:11, HLA-A*02:17, HLA-A*02:22, HLA-C*15:03	1	0	1	1	1	1	1	2	5	1.00614
EpI_NSP12_240	HLA-I	NSP12	332	342	KIFVDGVPFVV	11	Yes	NA	NA	NA	FVDGVPFVV	18133	HLA-A*02:01,HLA-A*02:02,HLA-A*02:03,HLA-A*02:06,HLA-A*68:02, HLA-A*01:01, HLA-A*69:01,	HLA-A*02:01, HLA-A*02:04, HLA-A*02:11	1	0	1	1	1	1	1	2	2	0.863282
EpI_NSP12_241	HLA-I	NSP12	332	340	KIFVDGVPF	9	No	NA	NA	NA	NA	NA	NA	HLA-B*15:01, HLA-B*15:04, HLA-B*35:01, HLA-B*35:05, HLA-B*35:11, HLA-B*35:43, HLA-C*01:02, HLA-C*03:04, HLA-C*16:01	1	0	3	1	4	0	3	2	4	1.28023
EpI_NSP12_242	HLA-I	NSP12	333	341	IFVDGVPFV	9	No	NA	NA	NA	NA	NA	NA	HLA-A*02:01, HLA-A*02:04, HLA-A*02:11, HLA-A*02:22, HLA-C*01:02, HLA-C*07:01, HLA-C*15:03	2	0	2	2	3	1	1	2	5	1.28578
EpI_NSP12_243	HLA-I	NSP12	333	342	IFVDGVPFVV	10	Yes	NA	NA	NA	FVDGVPFVV	18133	HLA-A*02:01,HLA-A*02:02,HLA-A*02:03,HLA-A*02:06,HLA-A*68:02, HLA-A*01:01, HLA-A*69:01,	HLA-A*02:01, HLA-A*02:04, HLA-A*02:11, HLA-A*23:01, HLA-A*24:02, HLA-C*15:03	2	0	3	2	2	2	1	3	4	1.53807
EpI_NSP12_244	HLA-I	NSP12	333	340	IFVDGVPF	8	No	NA	NA	NA	NA	NA	NA	HLA-A*23:01, HLA-A*24:02	1	0	2	1	1	1	0	1	1	0.627171
EpI_NSP12_245	HLA-I	NSP12	334	341	FVDGVPFV	8	Yes	NA	NA	NA	FVDGVPFVV	18133	HLA-A*02:01,HLA-A*02:02,HLA-A*02:03,HLA-A*02:06,HLA-A*68:02, HLA-A*01:01, HLA-A*69:01,	HLA-A*02:01, HLA-A*02:04, HLA-A*02:11, HLA-A*02:17, HLA-A*02:22, HLA-C*01:02, HLA-C*15:03	1	0	1	1	2	1	1	2	6	1.11258
EpI_NSP12_246	HLA-I	NSP12	334	342	FVDGVPFVV	9	Yes	NA	NA	NA	FVDGVPFVV	18133	HLA-A*02:01,HLA-A*02:02,HLA-A*02:03,HLA-A*02:06,HLA-A*68:02, HLA-A*01:01, HLA-A*69:01,	HLA-A*02:01, HLA-A*02:04, HLA-A*02:11, HLA-A*02:17, HLA-A*02:22, HLA-A*68:02, HLA-B*35:05, HLA-B*35:12, HLA-B*39:05, HLA-B*39:09, HLA-C*01:02, HLA-C*03:04, HLA-C*05:01, HLA-C*07:01, HLA-C*15:02, HLA-C*15:03, HLA-C*16:01	3	0	6	4	6	1	2	3	11	2.34776
EpI_NSP12_247	HLA-I	NSP12	337	346	GVPFVVSTGY	10	No	NA	NA	NA	NA	NA	NA	HLA-A*29:02, HLA-B*35:05, HLA-B*35:11, HLA-B*35:43	0	0	0	1	1	0	2	0	1	0.415266
EpI_NSP12_248	HLA-I	NSP12	338	346	VPFVVSTGY	9	No	NA	NA	NA	NA	NA	NA	HLA-B*35:01, HLA-B*35:05, HLA-B*35:11, HLA-B*35:12, HLA-B*35:43	1	0	1	1	1	0	2	1	2	0.677171
EpI_NSP12_249	HLA-I	NSP12	338	348	VPFVVSTGYHF	11	Yes	NA	NA	NA	PFVVSTGYHF	47595	HLA-A*01:01, HLA-A*23:01, HLA-A*24:02, HLA-A*26:01, HLA-A*29:02, Patr-A*09:01	HLA-B*35:01, HLA-B*35:05, HLA-B*35:11	1	0	1	1	0	0	2	1	0	0.523109
EpI_NSP12_250	HLA-I	NSP12	338	347	VPFVVSTGYH	10	No	NA	NA	NA	NA	NA	NA	HLA-B*35:05, HLA-B*35:11	0	0	0	0	0	0	2	0	0	0.25
EpI_NSP12_251	HLA-I	NSP12	339	348	PFVVSTGYHF	10	Yes	NA	NA	NA	PFVVSTGYHF	47595	HLA-A*01:01, HLA-A*23:01, HLA-A*24:02, HLA-A*26:01, HLA-A*29:02, Patr-A*09:01	HLA-A*23:01, HLA-A*24:02	1	0	2	1	1	1	0	1	1	0.627171
EpI_NSP12_252	HLA-I	NSP12	339	346	PFVVSTGY	8	Yes	NA	NA	NA	PFVVSTGYHF	47595	HLA-A*01:01, HLA-A*23:01, HLA-A*24:02, HLA-A*26:01, HLA-A*29:02, Patr-A*09:01	HLA-B*35:05, HLA-B*35:11	0	0	0	0	0	0	2	0	0	0.25
EpI_NSP12_253	HLA-I	NSP12	340	349	FVVSTGYHFR	10	Yes	NA	NA	NA	VVSTGYHFR	71837	HLA-A*03:01, HLA-A*11:01, HLA-A*31:01, HLA-A*33:01, HLA-A*68:01, Patr-A*01:01	HLA-A*11:01, HLA-A*31:01, HLA-A*68:01	2	0	1	2	1	1	1	1	1	0.818931
EpI_NSP12_254	HLA-I	NSP12	340	348	FVVSTGYHF	9	Yes	NA	NA	NA	PFVVSTGYHF	47595	HLA-A*01:01, HLA-A*23:01, HLA-A*24:02, HLA-A*26:01, HLA-A*29:02, Patr-A*09:01	HLA-A*23:01, HLA-A*29:02, HLA-A*68:02, HLA-B*15:01, HLA-B*15:04, HLA-B*35:01, HLA-B*35:05, HLA-B*35:11, HLA-B*35:12, HLA-B*35:43, HLA-C*01:02, HLA-C*03:04, HLA-C*07:01, HLA-C*15:03, HLA-C*16:01	2	0	5	3	5	0	3	2	7	1.75035
EpI_NSP12_255	HLA-I	NSP12	341	349	VVSTGYHFR	9	Yes	NA	NA	NA	VVSTGYHFR	71837	HLA-A*03:01, HLA-A*11:01, HLA-A*31:01, HLA-A*33:01, HLA-A*68:01, Patr-A*01:01	HLA-A*03:01, HLA-A*11:01, HLA-A*31:01, HLA-A*68:01	3	0	2	3	2	2	1	1	1	1.23975
EpI_NSP12_256	HLA-I	NSP12	343	351	STGYHFREL	9	No	NA	NA	NA	NA	NA	NA	HLA-B*08:01, HLA-C*01:02, HLA-C*03:04, HLA-C*15:03, HLA-C*16:01	1	0	3	0	3	0	0	1	3	0.628852
EpI_NSP12_257	HLA-I	NSP12	346	354	YHFRELGVV	9	No	NA	NA	NA	NA	NA	NA	HLA-B*39:05, HLA-B*39:09	0	0	0	1	0	0	0	0	2	0.154062
EpI_NSP12_258	HLA-I	NSP12	346	353	YHFRELGV	8	No	NA	NA	NA	NA	NA	NA	HLA-B*39:09	0	0	0	1	0	0	0	0	1	0.106443
EpI_NSP12_259	HLA-I	NSP12	353	361	VVHNQDVNL	9	No	NA	NA	NA	NA	NA	NA	HLA-B*15:04, HLA-C*01:02, HLA-C*03:04, HLA-C*15:03, HLA-C*16:01	0	0	2	0	3	0	1	1	3	0.650677
EpI_NSP12_260	HLA-I	NSP12	354	361	VHNQDVNL	8	No	NA	NA	NA	NA	NA	NA	HLA-B*39:05, HLA-B*39:09	0	0	0	1	0	0	0	0	2	0.154062
EpI_NSP12_261	HLA-I	NSP12	358	366	DVNLHSSRL	9	No	NA	NA	NA	NA	NA	NA	HLA-B*08:01, HLA-B*35:11, HLA-B*35:12, HLA-B*35:43	1	0	1	0	1	0	1	0	2	0.382236
EpI_NSP12_262	HLA-I	NSP12	359	368	VNLHSSRLSF	10	No	NA	NA	NA	NA	NA	NA	HLA-B*15:04	0	0	0	0	0	0	1	0	0	0.125
EpI_NSP12_263	HLA-I	NSP12	360	369	NLHSSRLSFK	10	No	NA	NA	NA	NA	NA	NA	HLA-A*03:01, HLA-A*11:01	2	0	2	1	1	1	0	0	0	0.523996
EpI_NSP12_264	HLA-I	NSP12	360	368	NLHSSRLSF	9	No	NA	NA	NA	NA	NA	NA	HLA-B*08:01, HLA-B*15:01, HLA-B*15:04, HLA-B*35:05, HLA-B*35:11, HLA-B*35:43, HLA-C*01:02, HLA-C*03:04, HLA-C*07:01, HLA-C*07:02, HLA-C*16:01	3	0	5	2	6	0	3	2	5	1.71067
EpI_NSP12_265	HLA-I	NSP12	363	371	SSRLSFKEL	9	No	NA	NA	NA	NA	NA	NA	HLA-B*08:01, HLA-C*01:02, HLA-C*03:04, HLA-C*15:03, HLA-C*16:01	1	0	3	0	3	0	0	1	3	0.628852
EpI_NSP12_266	HLA-I	NSP12	363	372	SSRLSFKELL	10	No	NA	NA	NA	NA	NA	NA	HLA-B*39:09, HLA-C*07:01	1	0	1	2	1	0	0	0	1	0.327264
EpI_NSP12_267	HLA-I	NSP12	364	371	SRLSFKEL	8	No	NA	NA	NA	NA	NA	NA	HLA-B*39:05, HLA-B*39:09, HLA-C*07:01	1	0	1	2	1	0	0	0	2	0.374883
EpI_NSP12_268	HLA-I	NSP12	364	372	SRLSFKELL	9	No	NA	NA	NA	NA	NA	NA	HLA-B*39:05, HLA-B*39:09, HLA-C*07:01	1	0	1	2	1	0	0	0	2	0.374883
EpI_NSP12_269	HLA-I	NSP12	364	373	SRLSFKELLV	10	No	NA	NA	NA	NA	NA	NA	HLA-C*07:01	1	0	1	1	1	0	0	0	0	0.220822
EpI_NSP12_270	HLA-I	NSP12	365	373	RLSFKELLV	9	Yes	NA	NA	NA	RLSFKELLVY	54756	HLA-A*01:01, HLA-A*29:02, HLA-A*30:02	HLA-A*02:01, HLA-A*02:04, HLA-A*02:11, HLA-A*02:17, HLA-A*02:22, HLA-C*15:03	1	0	1	1	1	1	1	2	5	1.00614
EpI_NSP12_271	HLA-I	NSP12	365	374	RLSFKELLVY	10	Yes	NA	NA	NA	LSFKELLVY, RLSFKELLVY	39346, 54756	HLA-A*23:01, Patr-B*01:01, HLA-A*01:01, HLA-A*29:02, HLA-A*30:02	HLA-A*03:01, HLA-A*11:01, HLA-A*29:02, HLA-B*15:01, HLA-B*15:04	2	0	2	2	1	1	1	0	1	0.755439
EpI_NSP12_272	HLA-I	NSP12	366	374	LSFKELLVY	9	Yes	NA	NA	NA	LSFKELLVY, RLSFKELLVY	39346, 54756	HLA-A*23:01, Patr-B*01:01, HLA-A*01:01, HLA-A*29:02, HLA-A*30:02	HLA-A*01:01, HLA-A*11:01, HLA-A*29:02, HLA-B*15:01, HLA-B*15:04, HLA-B*35:01, HLA-B*35:05, HLA-B*35:11, HLA-B*35:43, HLA-C*16:01	3	0	4	3	3	0	3	1	2	1.29143
EpI_NSP12_273	HLA-I	NSP12	367	374	SFKELLVY	8	Yes	NA	NA	NA	LSFKELLVY, RLSFKELLVY	39346, 54756	HLA-A*23:01, Patr-B*01:01, HLA-A*01:01, HLA-A*29:02, HLA-A*30:02	HLA-A*29:02	0	0	0	1	0	0	0	0	0	0.0588235
EpI_NSP12_274	HLA-I	NSP12	371	380	LLVYAADPAM	10	No	NA	NA	NA	NA	NA	NA	HLA-A*02:04	0	0	0	0	0	0	0	0	1	0.047619
EpI_NSP12_275	HLA-I	NSP12	372	380	LVYAADPAM	9	No	NA	NA	NA	NA	NA	NA	HLA-A*02:04, HLA-B*15:01, HLA-B*15:04, HLA-B*35:01, HLA-B*35:05, HLA-B*35:11, HLA-B*35:12, HLA-B*35:43, HLA-C*01:02, HLA-C*03:04, HLA-C*07:01, HLA-C*15:03, HLA-C*16:01	2	0	4	2	5	0	3	2	7	1.64391
EpI_NSP12_276	HLA-I	NSP12	373	381	VYAADPAMH	9	No	NA	NA	NA	NA	NA	NA	HLA-A*29:02	0	0	0	1	0	0	0	0	0	0.0588235
EpI_NSP12_277	HLA-I	NSP12	374	382	YAADPAMHA	9	No	NA	NA	NA	NA	NA	NA	HLA-A*02:22, HLA-A*68:02, HLA-B*15:04, HLA-B*35:05, HLA-B*35:11, HLA-B*35:12, HLA-B*35:43, HLA-C*01:02, HLA-C*03:04, HLA-C*05:01, HLA-C*07:01, HLA-C*12:03, HLA-C*15:02, HLA-C*15:03, HLA-C*16:01	3	0	5	2	6	0	3	1	7	1.69479
EpI_NSP12_278	HLA-I	NSP12	374	383	YAADPAMHAA	10	No	NA	NA	NA	NA	NA	NA	HLA-A*68:02, HLA-B*35:11, HLA-B*35:12, HLA-B*35:43, HLA-C*03:04, HLA-C*15:03	0	0	1	0	2	0	1	1	5	0.639472
EpI_NSP12_279	HLA-I	NSP12	375	383	AADPAMHAA	9	No	NA	NA	NA	NA	NA	NA	HLA-B*35:05, HLA-B*35:11, HLA-B*35:12, HLA-C*01:02, HLA-C*03:04, HLA-C*05:01, HLA-C*15:02, HLA-C*15:03, HLA-C*16:01	1	0	4	1	4	0	2	1	4	1.09174
EpI_NSP12_280	HLA-I	NSP12	379	387	AMHAASGNL	9	No	NA	NA	NA	NA	NA	NA	HLA-A*02:22, HLA-B*15:01, HLA-B*15:04, HLA-C*01:02, HLA-C*03:04	0	0	1	0	2	0	1	1	4	0.591853
EpI_NSP12_281	HLA-I	NSP12	379	388	AMHAASGNLL	10	No	NA	NA	NA	NA	NA	NA	HLA-B*15:04, HLA-B*39:05, HLA-B*39:09	0	0	0	1	0	0	1	0	2	0.279062
EpI_NSP12_282	HLA-I	NSP12	380	388	MHAASGNLL	9	No	NA	NA	NA	NA	NA	NA	HLA-B*35:12, HLA-B*39:05, HLA-B*39:09, HLA-C*03:04, HLA-C*07:01	1	0	2	2	2	0	0	1	4	0.687675
EpI_NSP12_283	HLA-I	NSP12	380	389	MHAASGNLLL	10	No	NA	NA	NA	NA	NA	NA	HLA-B*35:12, HLA-B*39:05, HLA-B*39:09, HLA-C*03:04, HLA-C*15:03	0	0	1	1	1	0	0	1	5	0.514472
EpI_NSP12_284	HLA-I	NSP12	380	387	MHAASGNL	8	No	NA	NA	NA	NA	NA	NA	HLA-B*39:05, HLA-B*39:09	0	0	0	1	0	0	0	0	2	0.154062
EpI_NSP12_285	HLA-I	NSP12	381	391	HAASGNLLLDK	11	Yes	NA	NA	NA	ASGNLLLDK	4428	HLA-A*03:01, HLA-A*11:01	HLA-A*11:01, HLA-A*68:01	1	0	1	1	1	1	0	0	0	0.420822
EpI_NSP12_286	HLA-I	NSP12	381	389	HAASGNLLL	9	No	NA	NA	NA	NA	NA	NA	HLA-A*68:02, HLA-B*15:04, HLA-B*35:01, HLA-B*35:05, HLA-B*35:11, HLA-B*35:12, HLA-B*35:43, HLA-B*39:05, HLA-B*39:09, HLA-C*01:02, HLA-C*03:04, HLA-C*05:01, HLA-C*06:02, HLA-C*07:01, HLA-C*15:02, HLA-C*15:03, HLA-C*16:01	4	0	7	5	7	0	3	2	8	2.23961
EpI_NSP12_287	HLA-I	NSP12	381	388	HAASGNLL	8	No	NA	NA	NA	NA	NA	NA	HLA-B*35:12, HLA-B*39:05, HLA-C*03:04	0	0	1	0	1	0	0	1	3	0.360411
EpI_NSP12_288	HLA-I	NSP12	382	391	AASGNLLLDK	10	Yes	NA	NA	NA	ASGNLLLDK	4428	HLA-A*03:01, HLA-A*11:01	HLA-A*03:01, HLA-A*11:01	2	0	2	1	1	1	0	0	0	0.523996
EpI_NSP12_289	HLA-I	NSP12	383	391	ASGNLLLDK	9	Yes	NA	NA	NA	ASGNLLLDK	4428	HLA-A*03:01, HLA-A*11:01	HLA-A*11:01	1	0	1	0	0	0	0	0	0	0.103175
EpI_NSP12_290	HLA-I	NSP12	384	392	SGNLLLDKR	9	No	NA	NA	NA	NA	NA	NA	HLA-A*31:01	1	0	0	1	0	0	1	1	1	0.398109
EpI_NSP12_291	HLA-I	NSP12	387	395	LLLDKRTTC	9	No	NA	NA	NA	NA	NA	NA	HLA-A*02:04	0	0	0	0	0	0	0	0	1	0.047619
EpI_NSP12_292	HLA-I	NSP12	387	396	LLLDKRTTCF	10	No	NA	NA	NA	NA	NA	NA	HLA-B*08:01, HLA-B*15:01	1	0	1	0	0	0	0	0	1	0.150794
EpI_NSP12_293	HLA-I	NSP12	388	396	LLDKRTTCF	9	No	NA	NA	NA	NA	NA	NA	HLA-B*08:01, HLA-C*01:02, HLA-C*04:01, HLA-C*05:01, HLA-C*15:03	3	0	3	2	3	0	0	1	3	0.85761
EpI_NSP12_294	HLA-I	NSP12	393	401	TTCFSVAAL	9	No	NA	NA	NA	NA	NA	NA	HLA-A*68:02	0	0	0	0	0	0	0	0	1	0.047619
EpI_NSP12_295	HLA-I	NSP12	396	405	FSVAALTNNV	10	No	NA	NA	NA	NA	NA	NA	HLA-A*02:22, HLA-A*68:02	0	0	0	0	0	0	0	0	2	0.0952381
EpI_NSP12_296	HLA-I	NSP12	397	405	SVAALTNNV	9	No	NA	NA	NA	NA	NA	NA	HLA-A*02:01, HLA-A*02:04, HLA-A*02:11, HLA-A*02:17, HLA-A*02:22, HLA-A*68:02, HLA-B*15:04, HLA-C*01:02, HLA-C*03:04, HLA-C*15:03, HLA-C*16:01	1	0	3	1	4	1	2	3	8	1.65682
EpI_NSP12_297	HLA-I	NSP12	397	406	SVAALTNNVA	10	No	NA	NA	NA	NA	NA	NA	HLA-A*68:02	0	0	0	0	0	0	0	0	1	0.047619
EpI_NSP12_298	HLA-I	NSP12	398	407	VAALTNNVAF	10	No	NA	NA	NA	NA	NA	NA	HLA-B*35:01, HLA-B*35:05, HLA-B*35:11, HLA-B*35:43, HLA-C*03:04	1	0	2	1	2	0	2	2	2	0.894725
EpI_NSP12_299	HLA-I	NSP12	399	407	AALTNNVAF	9	No	NA	NA	NA	NA	NA	NA	HLA-B*15:01, HLA-B*15:04, HLA-B*35:01, HLA-B*35:05, HLA-B*35:11, HLA-B*35:12, HLA-B*35:43, HLA-B*39:05, HLA-B*39:09, HLA-C*01:02, HLA-C*03:04, HLA-C*07:01, HLA-C*15:03, HLA-C*16:01	2	0	4	3	5	0	3	2	8	1.75035
EpI_NSP12_300	HLA-I	NSP12	401	410	LTNNVAFQTV	10	No	NA	NA	NA	NA	NA	NA	HLA-A*68:02	0	0	0	0	0	0	0	0	1	0.047619
EpI_NSP12_301	HLA-I	NSP12	403	411	NNVAFQTVK	9	No	NA	NA	NA	NA	NA	NA	HLA-A*68:01	0	0	0	1	1	1	0	0	0	0.317647
EpI_NSP12_302	HLA-I	NSP12	406	415	AFQTVKPGNF	10	No	NA	NA	NA	NA	NA	NA	HLA-A*23:01	0	0	1	0	0	0	0	0	0	0.047619
EpI_NSP12_303	HLA-I	NSP12	407	415	FQTVKPGNF	9	No	NA	NA	NA	NA	NA	NA	HLA-B*15:04	0	0	0	0	0	0	1	0	0	0.125
EpI_NSP12_304	HLA-I	NSP12	408	417	QTVKPGNFNK	10	Yes	NA	NA	NA	QTVKPGNFNK, TVKPGNFNK	52658, 67051	HLA-A*03:01, HLA-A*11:01, HLA-A*31:01, HLA-A*33:01, HLA-A*68:01	HLA-A*03:01, HLA-A*11:01, HLA-A*68:01	2	0	2	2	2	2	0	0	0	0.841643
EpI_NSP12_305	HLA-I	NSP12	409	417	TVKPGNFNK	9	Yes	NA	NA	NA	QTVKPGNFNK, TVKPGNFNK	52658, 67051	HLA-A*03:01, HLA-A*11:01, HLA-A*31:01, HLA-A*33:01, HLA-A*68:01	HLA-A*03:01, HLA-A*11:01, HLA-A*31:01, HLA-A*68:01	3	0	2	3	2	2	1	1	1	1.23975
EpI_NSP12_306	HLA-I	NSP12	411	419	KPGNFNKDF	9	No	NA	NA	NA	NA	NA	NA	HLA-B*35:05, HLA-B*35:11	0	0	0	0	0	0	2	0	0	0.25
EpI_NSP12_307	HLA-I	NSP12	411	420	KPGNFNKDFY	10	No	NA	NA	NA	NA	NA	NA	HLA-B*35:11	0	0	0	0	0	0	1	0	0	0.125
EpI_NSP12_308	HLA-I	NSP12	414	422	NFNKDFYDF	9	No	NA	NA	NA	NA	NA	NA	HLA-A*23:01, HLA-A*24:02	1	0	2	1	1	1	0	1	1	0.627171
EpI_NSP12_309	HLA-I	NSP12	416	424	NKDFYDFAV	9	No	NA	NA	NA	NA	NA	NA	HLA-B*39:05, HLA-B*39:09	0	0	0	1	0	0	0	0	2	0.154062
EpI_NSP12_310	HLA-I	NSP12	417	426	KDFYDFAVSK	10	Yes	NA	NA	NA	DFYDFAVSK	8339	qualitative binding	HLA-A*11:01	1	0	1	0	0	0	0	0	0	0.103175
EpI_NSP12_311	HLA-I	NSP12	418	426	DFYDFAVSK	9	Yes	NA	NA	NA	DFYDFAVSK	8339	qualitative binding	HLA-A*68:01	0	0	0	1	1	1	0	0	0	0.317647
EpI_NSP12_312	HLA-I	NSP12	419	429	FYDFAVSKGFF	11	No	NA	NA	NA	NA	NA	NA	HLA-A*24:02	1	0	1	1	1	1	0	1	1	0.579552
EpI_NSP12_313	HLA-I	NSP12	421	430	DFAVSKGFFK	10	Yes	NA	NA	NA	DFAVSKGFFK	8238	HLA-A*03:01, HLA-A*11:01, HLA-A*31:01, HLA-A*33:01, HLA-A*68:01	HLA-A*68:01	0	0	0	1	1	1	0	0	0	0.317647
EpI_NSP12_314	HLA-I	NSP12	422	430	FAVSKGFFK	9	Yes	NA	NA	NA	DFAVSKGFFK	8238	HLA-A*03:01, HLA-A*11:01, HLA-A*31:01, HLA-A*33:01, HLA-A*68:01	HLA-A*11:01, HLA-A*31:01, HLA-A*68:01	2	0	1	2	1	1	1	1	1	0.818931
EpI_NSP12_315	HLA-I	NSP12	422	429	FAVSKGFF	8	Yes	NA	NA	NA	DFAVSKGFFK	8238	HLA-A*03:01, HLA-A*11:01, HLA-A*31:01, HLA-A*33:01, HLA-A*68:01	HLA-B*35:05, HLA-B*35:11, HLA-B*35:43	0	0	0	0	1	0	2	0	1	0.356443
EpI_NSP12_316	HLA-I	NSP12	423	430	AVSKGFFK	8	Yes	NA	NA	NA	DFAVSKGFFK	8238	HLA-A*03:01, HLA-A*11:01, HLA-A*31:01, HLA-A*33:01, HLA-A*68:01	HLA-A*03:01, HLA-A*11:01	2	0	2	1	1	1	0	0	0	0.523996
EpI_NSP12_317	HLA-I	NSP12	428	435	FFKEGSSV	8	No	NA	NA	NA	NA	NA	NA	HLA-B*08:01	1	0	1	0	0	0	0	0	0	0.103175
EpI_NSP12_318	HLA-I	NSP12	428	437	FFKEGSSVEL	10	No	NA	NA	NA	NA	NA	NA	HLA-B*39:05, HLA-B*39:09	0	0	0	1	0	0	0	0	2	0.154062
EpI_NSP12_319	HLA-I	NSP12	429	437	FKEGSSVEL	9	No	NA	NA	NA	NA	NA	NA	HLA-B*39:05, HLA-B*39:09, HLA-C*07:01	1	0	1	2	1	0	0	0	2	0.374883
EpI_NSP12_320	HLA-I	NSP12	430	437	KEGSSVEL	8	No	NA	NA	NA	NA	NA	NA	HLA-B*40:02	0	0	0	0	1	1	0	0	1	0.306443
EpI_NSP12_321	HLA-I	NSP12	433	441	SSVELKHFF	9	No	NA	NA	NA	NA	NA	NA	HLA-B*15:01, HLA-B*15:04, HLA-B*35:05, HLA-B*35:11, HLA-B*35:43, HLA-C*01:02, HLA-C*03:04, HLA-C*07:01, HLA-C*15:03, HLA-C*16:01	1	0	3	1	5	0	3	1	5	1.27556
EpI_NSP12_322	HLA-I	NSP12	434	442	SVELKHFFF	9	No	NA	NA	NA	NA	NA	NA	HLA-C*01:02	0	0	0	0	1	0	0	0	1	0.106443
EpI_NSP12_323	HLA-I	NSP12	435	442	VELKHFFF	8	Yes	NA	NA	NA	VELKHFFFA	68271	HLA-B*18:01, HLA-B*40:02, HLA-B*44:03, HLA-B*45:01	HLA-B*18:01, HLA-B*40:02, HLA-B*44:03	2	0	1	1	2	1	0	0	1	0.58282
EpI_NSP12_324	HLA-I	NSP12	441	450	FFAQDGNAAI	10	No	NA	NA	NA	NA	NA	NA	HLA-B*35:12, HLA-C*01:02, HLA-C*03:04	0	0	1	0	2	0	0	1	3	0.419234
EpI_NSP12_325	HLA-I	NSP12	442	450	FAQDGNAAI	9	No	NA	NA	NA	NA	NA	NA	HLA-A*02:01, HLA-A*02:11, HLA-A*02:22, HLA-A*68:02, HLA-B*15:04, HLA-B*35:01, HLA-B*35:05, HLA-B*35:11, HLA-B*35:12, HLA-B*35:43, HLA-B*39:05, HLA-B*39:09, HLA-C*01:02, HLA-C*03:03, HLA-C*03:04, HLA-C*04:01, HLA-C*05:01, HLA-C*06:02, HLA-C*07:01, HLA-C*07:02, HLA-C*08:02, HLA-C*12:03, HLA-C*15:02, HLA-C*15:03, HLA-C*16:01	8	0	12	8	10	1	4	6	12	4.01279
EpI_NSP12_326	HLA-I	NSP12	445	453	DGNAAISDY	9	No	NA	NA	NA	NA	NA	NA	HLA-B*35:01, HLA-B*35:05, HLA-B*35:11, HLA-B*35:43	1	0	1	1	1	0	2	1	1	0.629552
EpI_NSP12_327	HLA-I	NSP12	446	455	GNAAISDYDY	10	Yes	NA	NA	NA	NAAISDYDY	43119	HLA-A*01:01, HLA-A*29:02, HLA-A*30:02	HLA-A*29:02	0	0	0	1	0	0	0	0	0	0.0588235
EpI_NSP12_328	HLA-I	NSP12	447	456	NAAISDYDYY	10	Yes	NA	NA	NA	AAISDYDYY, NAAISDYDY, NAAISDYDYY	234, 43119, 43120	HLA-A*01:01, HLA-A*29:02, HLA-A*30:02, HLA-A*26:01, Mamu-B*001:01, HLA-A*03:01, HLA-A*11:01, HLA-A*68:01	HLA-A*01:01, HLA-B*35:05, HLA-B*35:11, HLA-B*35:43	1	0	1	1	2	0	2	0	1	0.577264
EpI_NSP12_329	HLA-I	NSP12	447	455	NAAISDYDY	9	Yes	NA	NA	NA	NAAISDYDY, NAAISDYDYY	43119, 43120	HLA-A*01:01, HLA-A*29:02, HLA-A*30:02, HLA-A*26:01, Mamu-B*001:01	HLA-A*29:02, HLA-B*35:01, HLA-B*35:05, HLA-B*35:11, HLA-B*35:43	1	0	1	2	1	0	2	1	1	0.688375
EpI_NSP12_330	HLA-I	NSP12	447	457	NAAISDYDYYR	11	Yes	NA	NA	NA	AAISDYDYY, AISDYDYYR, NAAISDYDY, NAAISDYDYY	234, 2077, 43119, 43120	HLA-A*01:01, HLA-A*29:02, HLA-A*30:02, HLA-A*26:01, Mamu-B*001:01, HLA-A*03:01, HLA-A*11:01, HLA-A*68:01	HLA-A*68:01	0	0	0	1	1	1	0	0	0	0.317647
EpI_NSP12_331	HLA-I	NSP12	448	456	AAISDYDYY	9	Yes	NA	NA	NA	AAISDYDYY, NAAISDYDYY	234, 43120	HLA-A*01:01, HLA-A*29:02, HLA-A*30:02, HLA-A*26:01, Mamu-B*001:01, HLA-A*03:01, HLA-A*11:01, HLA-A*68:01	HLA-A*11:01, HLA-A*29:02, HLA-B*15:04, HLA-B*35:01, HLA-B*35:05, HLA-B*35:11, HLA-B*35:43	2	0	2	2	1	0	3	1	1	0.91655
EpI_NSP12_332	HLA-I	NSP12	448	457	AAISDYDYYR	10	Yes	NA	NA	NA	AAISDYDYY, AISDYDYYR	234, 2077	HLA-A*03:01, HLA-A*11:01, HLA-A*31:01, HLA-A*33:01, HLA-A*68:01	HLA-A*11:01, HLA-A*31:01, HLA-A*68:01	2	0	1	2	1	1	1	1	1	0.818931
EpI_NSP12_333	HLA-I	NSP12	448	458	AAISDYDYYRY	11	Yes	NA	NA	NA	AAISDYDYY, AISDYDYYR, AISDYDYYRY, ISDYDYYRY	234, 2077, 2078, 28464	HLA-A*03:01, HLA-A*11:01, HLA-A*31:01, HLA-A*33:01, HLA-A*68:01, HLA-A*01:01, HLA-A*29:02, HLA-A*30:02, HLA-A*26:01, HLA-B*58:01	HLA-A*29:02	0	0	0	1	0	0	0	0	0	0.0588235
EpI_NSP12_334	HLA-I	NSP12	449	456	AISDYDYY	8	Yes	NA	NA	NA	AAISDYDYY, AISDYDYYR, AISDYDYYRY, NAAISDYDYY	234, 2077, 2078, 43120	HLA-A*03:01, HLA-A*11:01, HLA-A*31:01, HLA-A*33:01, HLA-A*68:01, HLA-A*01:01, HLA-A*29:02, HLA-A*30:02, HLA-A*26:01, HLA-B*58:01	HLA-A*01:01, HLA-A*29:02	1	0	1	2	1	0	0	0	0	0.279645
EpI_NSP12_335	HLA-I	NSP12	449	458	AISDYDYYRY	10	Yes	NA	NA	NA	AISDYDYYR, AISDYDYYRY, ISDYDYYRY	2077, 2078, 28464	HLA-A*03:01, HLA-A*11:01, HLA-A*31:01, HLA-A*33:01, HLA-A*68:01, HLA-A*01:01, HLA-A*29:02, HLA-A*30:02, HLA-A*26:01, HLA-B*58:01	HLA-A*01:01, HLA-A*11:01, HLA-A*29:02, HLA-B*15:01	2	0	2	2	1	0	0	0	1	0.430439
EpI_NSP12_336	HLA-I	NSP12	449	457	AISDYDYYR	9	Yes	NA	NA	NA	AISDYDYYR, AISDYDYYRY	2077, 2078	HLA-A*03:01, HLA-A*11:01, HLA-A*31:01, HLA-A*33:01, HLA-A*68:01, HLA-A*01:01, HLA-A*29:02, HLA-A*30:02, HLA-A*26:01	HLA-A*11:01, HLA-A*31:01, HLA-A*68:01	2	0	1	2	1	1	1	1	1	0.818931
EpI_NSP12_337	HLA-I	NSP12	450	458	ISDYDYYRY	9	Yes	NA	NA	NA	AISDYDYYRY, ISDYDYYRY	2078, 28464	HLA-A*01:01, HLA-A*26:01, HLA-A*29:02, HLA-A*30:02, HLA-B*58:01	HLA-A*01:01, HLA-A*29:02, HLA-B*35:05, HLA-B*35:11, HLA-B*35:43	1	0	1	2	2	0	2	0	1	0.636088
EpI_NSP12_338	HLA-I	NSP12	451	458	SDYDYYRY	8	Yes	NA	NA	NA	AISDYDYYRY, ISDYDYYRY	2078, 28464	HLA-A*01:01, HLA-A*26:01, HLA-A*29:02, HLA-A*30:02, HLA-B*58:01	HLA-A*29:02, HLA-B*44:03	1	0	1	1	1	0	0	0	0	0.220822
EpI_NSP12_339	HLA-I	NSP12	452	460	DYDYYRYNL	9	No	NA	NA	NA	NA	NA	NA	HLA-A*23:01, HLA-B*39:05, HLA-B*39:09, HLA-C*04:01, HLA-C*07:01	2	0	3	3	2	0	0	1	3	0.802054
EpI_NSP12_340	HLA-I	NSP12	454	463	DYYRYNLPTM	10	Yes	NA	NA	NA	YYRYNLPTM	76599	HLA-A*23:01, HLA-A*24:02, HLA-A*29:02, HLA-A*30:02	HLA-A*23:01, HLA-A*24:02	1	0	2	1	1	1	0	1	1	0.627171
EpI_NSP12_341	HLA-I	NSP12	455	463	YYRYNLPTM	9	Yes	NA	NA	NA	YYRYNLPTM	76599	HLA-A*23:01, HLA-A*24:02, HLA-A*29:02, HLA-A*30:02	HLA-A*23:01, HLA-A*24:02, HLA-B*35:11, HLA-B*39:09, HLA-C*01:02, HLA-C*03:04, HLA-C*06:02, HLA-C*07:01, HLA-C*07:02, HLA-C*12:03, HLA-C*16:01	5	0	7	5	7	1	1	3	5	2.21342
EpI_NSP12_342	HLA-I	NSP12	456	463	YRYNLPTM	8	Yes	NA	NA	NA	YYRYNLPTM	76599	HLA-A*23:01, HLA-A*24:02, HLA-A*29:02, HLA-A*30:02	HLA-B*39:05, HLA-B*39:09, HLA-C*07:01, HLA-C*07:02, HLA-C*12:03	3	0	2	3	2	0	0	1	3	0.809991
EpI_NSP12_343	HLA-I	NSP12	456	464	YRYNLPTMC	9	No	NA	NA	NA	NA	NA	NA	HLA-B*39:05, HLA-B*39:09, HLA-C*06:02, HLA-C*07:01	2	0	2	3	2	0	0	0	2	0.595705
EpI_NSP12_344	HLA-I	NSP12	456	466	YRYNLPTMCDI	11	Yes	NA	NA	NA	RYNLPTMCDI	56598	HLA-A*23:01, HLA-A*24:02, HLA-A*29:02, HLA-A*30:02	HLA-C*07:01	1	0	1	1	1	0	0	0	0	0.220822
EpI_NSP12_345	HLA-I	NSP12	457	466	RYNLPTMCDI	10	Yes	NA	NA	NA	RYNLPTMCDI	56598	HLA-A*23:01, HLA-A*24:02, HLA-A*29:02, HLA-A*30:02	HLA-A*24:02	1	0	1	1	1	1	0	1	1	0.579552
EpI_NSP12_346	HLA-I	NSP12	457	467	RYNLPTMCDIR	11	Yes	NA	NA	NA	RYNLPTMCDI	56598	HLA-A*23:01, HLA-A*24:02, HLA-A*29:02, HLA-A*30:02	HLA-A*31:01	1	0	0	1	0	0	1	1	1	0.398109
EpI_NSP12_347	HLA-I	NSP12	460	469	LPTMCDIRQL	10	No	NA	NA	NA	NA	NA	NA	HLA-B*07:02, HLA-B*35:12	1	0	1	1	0	0	0	0	1	0.209617
EpI_NSP12_348	HLA-I	NSP12	460	470	LPTMCDIRQLL	11	No	NA	NA	NA	NA	NA	NA	HLA-B*07:02, HLA-B*35:12	1	0	1	1	0	0	0	0	1	0.209617
EpI_NSP12_349	HLA-I	NSP12	462	470	TMCDIRQLL	9	No	NA	NA	NA	NA	NA	NA	HLA-A*02:01, HLA-A*02:04, HLA-A*02:11, HLA-A*02:22, HLA-B*15:04, HLA-B*39:09	1	0	1	2	1	1	2	2	4	1.14234
EpI_NSP12_350	HLA-I	NSP12	463	471	MCDIRQLLF	9	No	NA	NA	NA	NA	NA	NA	HLA-C*04:01, HLA-C*05:01	2	0	2	2	2	0	0	1	1	0.600373
EpI_NSP12_351	HLA-I	NSP12	467	475	RQLLFVVEV	9	Yes	NA	NA	NA	RQLLFVVEV	55444	HLA-A*02:01,HLA-A*02:02,HLA-A*02:03,HLA-A*02:06,HLA-A*68:02	HLA-A*02:01, HLA-A*02:04, HLA-A*02:11, HLA-A*02:17, HLA-A*02:22, HLA-B*39:05, HLA-B*39:09	1	0	1	2	1	1	1	2	6	1.11258
EpI_NSP12_352	HLA-I	NSP12	468	476	QLLFVVEVV	9	No	NA	NA	NA	NA	NA	NA	HLA-A*02:01, HLA-A*02:04, HLA-A*02:11, HLA-A*02:17, HLA-A*02:22	1	0	1	1	1	1	1	2	4	0.95852
EpI_NSP12_353	HLA-I	NSP12	468	475	QLLFVVEV	8	Yes	NA	NA	NA	RQLLFVVEV	55444	HLA-A*02:01,HLA-A*02:02,HLA-A*02:03,HLA-A*02:06,HLA-A*68:02	HLA-A*02:04	0	0	0	0	0	0	0	0	1	0.047619
EpI_NSP12_354	HLA-I	NSP12	471	479	FVVEVVDKY	9	No	NA	NA	NA	NA	NA	NA	HLA-A*29:02, HLA-A*68:01, HLA-B*15:01, HLA-B*15:04, HLA-B*35:01, HLA-B*35:05, HLA-B*35:11, HLA-B*35:12, HLA-B*35:43, HLA-C*03:04, HLA-C*07:01, HLA-C*16:01	2	0	4	4	5	1	3	2	4	1.8187
EpI_NSP12_355	HLA-I	NSP12	471	480	FVVEVVDKYF	10	No	NA	NA	NA	NA	NA	NA	HLA-B*35:43	0	0	0	0	1	0	0	0	1	0.106443
EpI_NSP12_356	HLA-I	NSP12	472	480	VVEVVDKYF	9	No	NA	NA	NA	NA	NA	NA	HLA-B*35:05, HLA-B*35:11, HLA-B*35:43	0	0	0	0	1	0	2	0	1	0.356443
EpI_NSP12_357	HLA-I	NSP12	473	480	VEVVDKYF	8	No	NA	NA	NA	NA	NA	NA	HLA-B*44:03	1	0	1	0	1	0	0	0	0	0.161998
EpI_NSP12_358	HLA-I	NSP12	474	482	EVVDKYFDC	9	No	NA	NA	NA	NA	NA	NA	HLA-A*68:02	0	0	0	0	0	0	0	0	1	0.047619
EpI_NSP12_359	HLA-I	NSP12	475	483	VVDKYFDCY	9	Yes	NA	NA	NA	VVDKYFDCY	71635	HLA-A*01:01, HLA-A*03:01, HLA-A*11:01, HLA-A*29:02, HLA-A*30:02	HLA-A*01:01	1	0	1	1	1	0	0	0	0	0.220822
EpI_NSP12_360	HLA-I	NSP12	489	498	NANQVIVNNL	10	No	NA	NA	NA	NA	NA	NA	HLA-A*68:02	0	0	0	0	0	0	0	0	1	0.047619
EpI_NSP12_361	HLA-I	NSP12	491	498	NQVIVNNL	8	No	NA	NA	NA	NA	NA	NA	HLA-B*39:05, HLA-B*39:09	0	0	0	1	0	0	0	0	2	0.154062
EpI_NSP12_362	HLA-I	NSP12	492	500	QVIVNNLDK	9	No	NA	NA	NA	NA	NA	NA	HLA-A*11:01, HLA-A*68:01	1	0	1	1	1	1	0	0	0	0.420822
EpI_NSP12_363	HLA-I	NSP12	500	508	KSAGFPFNK	9	Yes	NA	NA	NA	KSAGFPFNK	33269	HLA-A*01:01, HLA-A*11:01, HLA-A*31:01, HLA-A*33:01, HLA-A*68:01	HLA-A*03:01, HLA-A*11:01, HLA-A*31:01, HLA-A*68:01	3	0	2	3	2	2	1	1	1	1.23975
EpI_NSP12_364	HLA-I	NSP12	501	508	SAGFPFNK	8	Yes	NA	NA	NA	KSAGFPFNK	33269	HLA-A*01:01, HLA-A*11:01, HLA-A*31:01, HLA-A*33:01, HLA-A*68:01	HLA-A*11:01	1	0	1	0	0	0	0	0	0	0.103175
EpI_NSP12_365	HLA-I	NSP12	501	509	SAGFPFNKW	9	No	NA	NA	NA	NA	NA	NA	HLA-B*35:05	0	0	0	0	0	0	1	0	0	0.125
EpI_NSP12_366	HLA-I	NSP12	502	511	AGFPFNKWGK	10	Yes	NA	NA	NA	GFPFNKWGK	19599	HLA-A*11:01, HLA-A*31:01	HLA-A*11:01, HLA-A*31:01	2	0	1	1	0	0	1	1	1	0.501284
EpI_NSP12_367	HLA-I	NSP12	504	514	FPFNKWGKARL	11	No	NA	NA	NA	NA	NA	NA	HLA-B*07:02, HLA-B*35:12	1	0	1	1	0	0	0	0	1	0.209617
EpI_NSP12_368	HLA-I	NSP12	504	512	FPFNKWGKA	9	No	NA	NA	NA	NA	NA	NA	HLA-B*35:05, HLA-B*35:11, HLA-B*35:12, HLA-B*35:43	0	0	0	0	1	0	2	0	2	0.404062
EpI_NSP12_369	HLA-I	NSP12	505	513	PFNKWGKAR	9	No	NA	NA	NA	NA	NA	NA	HLA-A*31:01	1	0	0	1	0	0	1	1	1	0.398109
EpI_NSP12_370	HLA-I	NSP12	506	515	FNKWGKARLY	10	No	NA	NA	NA	NA	NA	NA	HLA-A*29:02	0	0	0	1	0	0	0	0	0	0.0588235
EpI_NSP12_371	HLA-I	NSP12	507	516	NKWGKARLYY	10	No	NA	NA	NA	NA	NA	NA	HLA-A*29:02	0	0	0	1	0	0	0	0	0	0.0588235
EpI_NSP12_372	HLA-I	NSP12	507	515	NKWGKARLY	9	No	NA	NA	NA	NA	NA	NA	HLA-C*07:01	1	0	1	1	1	0	0	0	0	0.220822
EpI_NSP12_373	HLA-I	NSP12	508	516	KWGKARLYY	9	No	NA	NA	NA	NA	NA	NA	HLA-A*29:02	0	0	0	1	0	0	0	0	0	0.0588235
EpI_NSP12_374	HLA-I	NSP12	511	521	KARLYYDSMSY	11	Yes	NA	NA	NA	RLYYDSMSY	54847	HLA-A*03:01, HLA-A*11:01, HLA-B*15:01, HLA-B*58:01, HLA-B*27:05	HLA-B*15:01, HLA-B*15:04	0	0	0	0	0	0	1	0	1	0.172619
EpI_NSP12_375	HLA-I	NSP12	511	519	KARLYYDSM	9	No	NA	NA	NA	NA	NA	NA	HLA-B*15:04, HLA-B*35:11, HLA-B*35:43, HLA-C*01:02, HLA-C*03:04, HLA-C*16:01	0	0	2	0	4	0	2	1	3	0.8345
EpI_NSP12_376	HLA-I	NSP12	512	521	ARLYYDSMSY	10	Yes	NA	NA	NA	RLYYDSMSY	54847	HLA-A*03:01, HLA-A*11:01, HLA-B*15:01, HLA-B*58:01, HLA-B*27:05	HLA-B*15:04, HLA-C*07:01	1	0	1	1	1	0	1	0	0	0.345822
EpI_NSP12_377	HLA-I	NSP12	513	521	RLYYDSMSY	9	Yes	NA	NA	NA	RLYYDSMSY	54847	HLA-A*03:01, HLA-A*11:01, HLA-B*15:01, HLA-B*58:01, HLA-B*27:05	HLA-A*03:01, HLA-A*11:01, HLA-A*29:02, HLA-B*15:01, HLA-B*15:04, HLA-B*35:05, HLA-B*35:11, HLA-B*35:43, HLA-C*01:02, HLA-C*06:02, HLA-C*07:01, HLA-C*15:03, HLA-C*16:01	4	0	5	4	6	1	3	0	4	1.81403
EpI_NSP12_378	HLA-I	NSP12	513	522	RLYYDSMSYE	10	Yes	NA	NA	NA	RLYYDSMSY	54847	HLA-A*03:01, HLA-A*11:01, HLA-B*15:01, HLA-B*58:01, HLA-B*27:05	HLA-A*03:01, HLA-B*15:04	1	0	1	1	1	1	1	0	0	0.545822
EpI_NSP12_379	HLA-I	NSP12	514	521	LYYDSMSY	8	Yes	NA	NA	NA	RLYYDSMSY	54847	HLA-A*03:01, HLA-A*11:01, HLA-B*15:01, HLA-B*58:01, HLA-B*27:05	HLA-A*29:02, HLA-B*15:01, HLA-C*07:01, HLA-C*07:02	2	0	2	3	2	0	0	1	2	0.706816
EpI_NSP12_380	HLA-I	NSP12	518	527	SMSYEDQDAL	10	No	NA	NA	NA	NA	NA	NA	HLA-A*02:04, HLA-A*02:22	0	0	0	0	0	0	0	0	2	0.0952381
EpI_NSP12_381	HLA-I	NSP12	519	527	MSYEDQDAL	9	No	NA	NA	NA	NA	NA	NA	HLA-A*68:02, HLA-B*15:04, HLA-B*35:01, HLA-B*35:05, HLA-B*35:11, HLA-B*35:12, HLA-B*35:43, HLA-B*39:05, HLA-B*39:09, HLA-C*01:02, HLA-C*03:03, HLA-C*03:04, HLA-C*06:02, HLA-C*07:01, HLA-C*15:02, HLA-C*15:03, HLA-C*16:01	3	0	7	4	6	0	3	2	8	2.06641
EpI_NSP12_382	HLA-I	NSP12	519	528	MSYEDQDALF	10	Yes	NA	NA	NA	SYEDQDALF	62531	HLA-A*24:01, HLA-A*29:01, HLA-A*30:02	HLA-B*15:01, HLA-B*15:04, HLA-B*35:01, HLA-B*35:05, HLA-B*35:11, HLA-B*35:43	1	0	1	1	1	0	3	1	2	0.802171
EpI_NSP12_383	HLA-I	NSP12	520	528	SYEDQDALF	9	Yes	NA	NA	NA	SYEDQDALF	62531	HLA-A*24:01, HLA-A*29:01, HLA-A*30:02	HLA-A*24:02, HLA-C*04:01, HLA-C*07:01	3	0	3	3	3	1	0	2	2	1.17993
EpI_NSP12_384	HLA-I	NSP12	520	530	SYEDQDALFAY	11	Yes	NA	NA	NA	SYEDQDALF, YEDQDALFA, YEDQDALFAY	62531, 73632, 73633	HLA-A*24:01, HLA-A*29:01, HLA-A*30:02, HLA-B*40:02, HLA-B*45:01,	HLA-A*29:02	0	0	0	1	0	0	0	0	0	0.0588235
EpI_NSP12_385	HLA-I	NSP12	521	528	YEDQDALF	8	Yes	NA	NA	NA	SYEDQDALF, YEDQDALFA, YEDQDALFAY	62531, 73632, 73633	HLA-A*24:01, HLA-A*29:01, HLA-A*30:02, HLA-B*40:02, HLA-B*45:01	HLA-B*18:01	1	0	0	1	0	0	0	0	0	0.114379
EpI_NSP12_386	HLA-I	NSP12	521	530	YEDQDALFAY	10	Yes	NA	NA	NA	YEDQDALFA, YEDQDALFAY	73632, 73633	HLA-A*24:01, HLA-A*29:01, HLA-A*30:02, HLA-B*40:02, HLA-B*45:01	HLA-B*18:01	1	0	0	1	0	0	0	0	0	0.114379
EpI_NSP12_387	HLA-I	NSP12	522	530	EDQDALFAY	9	Yes	NA	NA	NA	YEDQDALFAY	73633	HLA-A*29:01, HLA-A*30:02	HLA-B*18:01	1	0	0	1	0	0	0	0	0	0.114379
EpI_NSP12_388	HLA-I	NSP12	523	530	DQDALFAY	8	Yes	NA	NA	NA	DQDALFAYTK, YEDQDALFAY	9831, 73633	HLA-A*29:01, HLA-A*30:02, HLA-A*03:01, HLA-A*11:01, HLA-A*31:01, HLA-A*68:01, HLA-A*33:01	HLA-B*18:01	1	0	0	1	0	0	0	0	0	0.114379
EpI_NSP12_389	HLA-I	NSP12	525	533	DALFAYTKR	9	No	NA	NA	NA	NA	NA	NA	HLA-A*68:01	0	0	0	1	1	1	0	0	0	0.317647
EpI_NSP12_390	HLA-I	NSP12	526	535	ALFAYTKRNV	10	No	NA	NA	NA	NA	NA	NA	HLA-A*02:01, HLA-A*02:04, HLA-A*02:11, HLA-A*02:17, HLA-A*02:22	1	0	1	1	1	1	1	2	4	0.95852
EpI_NSP12_391	HLA-I	NSP12	526	533	ALFAYTKR	8	No	NA	NA	NA	NA	NA	NA	HLA-A*03:01, HLA-A*31:01	2	0	1	2	1	1	1	1	1	0.818931
EpI_NSP12_392	HLA-I	NSP12	528	536	FAYTKRNVI	9	No	NA	NA	NA	NA	NA	NA	HLA-B*08:01, HLA-B*15:04, HLA-B*35:05, HLA-B*35:11, HLA-B*35:12, HLA-B*35:43, HLA-B*39:05, HLA-B*39:09, HLA-C*01:02, HLA-C*03:04, HLA-C*06:02, HLA-C*07:01, HLA-C*12:03, HLA-C*15:02, HLA-C*15:03, HLA-C*16:01	4	0	6	3	6	0	3	1	7	1.85679
EpI_NSP12_393	HLA-I	NSP12	529	539	AYTKRNVIPTI	11	No	NA	NA	NA	NA	NA	NA	HLA-A*24:02	1	0	1	1	1	1	0	1	1	0.579552
EpI_NSP12_394	HLA-I	NSP12	531	539	TKRNVIPTI	9	No	NA	NA	NA	NA	NA	NA	HLA-B*39:05, HLA-C*07:01	1	0	1	1	1	0	0	0	1	0.268441
EpI_NSP12_395	HLA-I	NSP12	532	539	KRNVIPTI	8	No	NA	NA	NA	NA	NA	NA	HLA-C*07:01	1	0	1	1	1	0	0	0	0	0.220822
EpI_NSP12_396	HLA-I	NSP12	532	542	KRNVIPTITQM	11	No	NA	NA	NA	NA	NA	NA	HLA-C*07:01	1	0	1	1	1	0	0	0	0	0.220822
EpI_NSP12_397	HLA-I	NSP12	533	542	RNVIPTITQM	10	No	NA	NA	NA	NA	NA	NA	HLA-B*15:04, HLA-C*01:02, HLA-C*03:04, HLA-C*15:03, HLA-C*16:01	0	0	2	0	3	0	1	1	3	0.650677
EpI_NSP12_398	HLA-I	NSP12	534	542	NVIPTITQM	9	No	NA	NA	NA	NA	NA	NA	HLA-A*02:04, HLA-A*68:02, HLA-B*15:04, HLA-B*35:01, HLA-B*35:05, HLA-B*35:11, HLA-B*35:12, HLA-B*35:43, HLA-B*39:05, HLA-B*39:09, HLA-C*01:02, HLA-C*03:04, HLA-C*07:01, HLA-C*15:02, HLA-C*15:03, HLA-C*16:01	2	0	5	3	5	0	3	2	9	1.84559
EpI_NSP12_399	HLA-I	NSP12	534	544	NVIPTITQMNL	11	Yes	NA	NA	NA	IPTITQMNL	28087	HLA-B*07:02, HLA-B*35:01, HLA-B*51:01, HLA-B*53:01	HLA-A*68:02	0	0	0	0	0	0	0	0	1	0.047619
EpI_NSP12_400	HLA-I	NSP12	535	545	VIPTITQMNLK	11	Yes	NA	NA	NA	IPTITQMNL	28087	HLA-B*07:02, HLA-B*35:01, HLA-B*51:01, HLA-B*53:01	HLA-A*11:01	1	0	1	0	0	0	0	0	0	0.103175
EpI_NSP12_401	HLA-I	NSP12	536	544	IPTITQMNL	9	Yes	NA	NA	NA	IPTITQMNL	28087	HLA-B*07:02, HLA-B*35:01, HLA-B*51:01, HLA-B*53:01	HLA-B*07:02, HLA-B*35:05, HLA-B*35:11, HLA-B*35:12, HLA-B*35:43, HLA-B*39:09, HLA-C*01:02, HLA-C*03:04, HLA-C*16:01	1	0	3	2	4	0	2	1	5	1.15056
EpI_NSP12_402	HLA-I	NSP12	536	546	IPTITQMNLKY	11	Yes	NA	NA	NA	IPTITQMNL, PTITQMNLKY	28087, 49676	HLA-B*07:02, HLA-B*35:01, HLA-B*51:01, HLA-B*53:01, HLA-A*01:01, HLA-A*26:01, HLA-A*29:02, HLA-A*30:02	HLA-B*35:01, HLA-B*35:05, HLA-B*35:11	1	0	1	1	0	0	2	1	0	0.523109
EpI_NSP12_403	HLA-I	NSP12	537	546	PTITQMNLKY	10	Yes	NA	NA	NA	PTITQMNLKY	49676	HLA-A*01:01, HLA-A*26:01, HLA-A*29:02, HLA-A*30:02	HLA-A*01:01, HLA-A*29:02	1	0	1	2	1	0	0	0	0	0.279645
EpI_NSP12_404	HLA-I	NSP12	537	545	PTITQMNLK	9	Yes	NA	NA	NA	PTITQMNLKY	49676	HLA-A*01:01, HLA-A*26:01, HLA-A*29:02, HLA-A*30:02	HLA-A*11:01	1	0	1	0	0	0	0	0	0	0.103175
EpI_NSP12_405	HLA-I	NSP12	538	546	TITQMNLKY	9	Yes	NA	NA	NA	PTITQMNLKY	49676	HLA-A*01:01, HLA-A*26:01, HLA-A*29:02, HLA-A*30:02	HLA-A*29:02, HLA-B*15:04, HLA-B*35:05, HLA-B*35:11, HLA-B*35:43	0	0	0	1	1	0	3	0	1	0.540266
EpI_NSP12_406	HLA-I	NSP12	539	546	ITQMNLKY	8	Yes	NA	NA	NA	PTITQMNLKY	49676	HLA-A*01:01, HLA-A*26:01, HLA-A*29:02, HLA-A*30:02	HLA-A*01:01, HLA-A*29:02	1	0	1	2	1	0	0	0	0	0.279645
EpI_NSP12_407	HLA-I	NSP12	540	548	TQMNLKYAI	9	No	NA	NA	NA	NA	NA	NA	HLA-B*15:04, HLA-B*39:05, HLA-B*39:09, HLA-C*16:01	0	0	1	1	1	0	1	0	2	0.385504
EpI_NSP12_408	HLA-I	NSP12	541	548	QMNLKYAI	8	No	NA	NA	NA	NA	NA	NA	HLA-B*08:01	1	0	1	0	0	0	0	0	0	0.103175
EpI_NSP12_409	HLA-I	NSP12	542	551	MNLKYAISAK	10	No	NA	NA	NA	NA	NA	NA	HLA-A*03:01	1	0	1	1	1	1	0	0	0	0.420822
EpI_NSP12_410	HLA-I	NSP12	543	551	NLKYAISAK	9	No	NA	NA	NA	NA	NA	NA	HLA-A*03:01, HLA-A*68:01	1	0	1	2	2	2	0	0	0	0.738469
EpI_NSP12_411	HLA-I	NSP12	545	553	KYAISAKNR	9	No	NA	NA	NA	NA	NA	NA	HLA-A*31:01	1	0	0	1	0	0	1	1	1	0.398109
EpI_NSP12_412	HLA-I	NSP12	545	555	KYAISAKNRAR	11	No	NA	NA	NA	NA	NA	NA	HLA-A*31:01	1	0	0	1	0	0	1	1	1	0.398109
EpI_NSP12_413	HLA-I	NSP12	546	555	YAISAKNRAR	10	No	NA	NA	NA	NA	NA	NA	HLA-A*68:01	0	0	0	1	1	1	0	0	0	0.317647
EpI_NSP12_414	HLA-I	NSP12	546	554	YAISAKNRA	9	No	NA	NA	NA	NA	NA	NA	HLA-B*15:04, HLA-B*35:11, HLA-B*35:43, HLA-C*03:04	0	0	1	0	2	0	2	1	2	0.621615
EpI_NSP12_415	HLA-I	NSP12	547	555	AISAKNRAR	9	No	NA	NA	NA	NA	NA	NA	HLA-A*31:01	1	0	0	1	0	0	1	1	1	0.398109
EpI_NSP12_416	HLA-I	NSP12	549	557	SAKNRARTV	9	No	NA	NA	NA	NA	NA	NA	HLA-B*08:01, HLA-C*01:02, HLA-C*06:02, HLA-C*07:01, HLA-C*12:03, HLA-C*16:01	4	0	4	2	4	0	0	0	1	0.813259
EpI_NSP12_417	HLA-I	NSP12	552	560	NRARTVAGV	9	No	NA	NA	NA	NA	NA	NA	HLA-B*39:05, HLA-B*39:09, HLA-C*07:01	1	0	1	2	1	0	0	0	2	0.374883
EpI_NSP12_418	HLA-I	NSP12	553	562	RARTVAGVSI	10	No	NA	NA	NA	NA	NA	NA	HLA-B*07:02	1	0	1	1	0	0	0	0	0	0.161998
EpI_NSP12_419	HLA-I	NSP12	554	562	ARTVAGVSI	9	No	NA	NA	NA	NA	NA	NA	HLA-B*39:05, HLA-B*39:09, HLA-C*07:01	1	0	1	2	1	0	0	0	2	0.374883
EpI_NSP12_420	HLA-I	NSP12	555	562	RTVAGVSI	8	No	NA	NA	NA	NA	NA	NA	HLA-C*15:03, HLA-C*16:01	0	0	1	0	1	0	0	0	1	0.154062
EpI_NSP12_421	HLA-I	NSP12	556	565	TVAGVSICST	10	No	NA	NA	NA	NA	NA	NA	HLA-A*68:02	0	0	0	0	0	0	0	0	1	0.047619
EpI_NSP12_422	HLA-I	NSP12	556	566	TVAGVSICSTM	11	No	NA	NA	NA	NA	NA	NA	HLA-A*68:02	0	0	0	0	0	0	0	0	1	0.047619
EpI_NSP12_423	HLA-I	NSP12	558	566	AGVSICSTM	9	No	NA	NA	NA	NA	NA	NA	HLA-C*16:01	0	0	1	0	1	0	0	0	0	0.106443
EpI_NSP12_424	HLA-I	NSP12	560	569	VSICSTMTNR	10	Yes	NA	NA	NA	SICSTMTNR	58467	HLA-A*03:01, HLA-A*11:01, HLA-A*31:01, HLA-A*33:01, HLA-A*68:01	HLA-A*11:01, HLA-A*31:01, HLA-A*68:01	2	0	1	2	1	1	1	1	1	0.818931
EpI_NSP12_425	HLA-I	NSP12	561	569	SICSTMTNR	9	Yes	NA	NA	NA	SICSTMTNR	58467	HLA-A*03:01, HLA-A*11:01, HLA-A*31:01, HLA-A*33:01, HLA-A*68:01	HLA-A*11:01, HLA-A*31:01, HLA-A*68:01	2	0	1	2	1	1	1	1	1	0.818931
EpI_NSP12_426	HLA-I	NSP12	564	574	STMTNRQFHQK	11	Yes	NA	NA	NA	MTNRQFHQK	42843	HLA-A*03:01, HLA-A*11:01, HLA-A*31:01, HLA-A*33:01, HLA-A*68:01	HLA-A*03:01, HLA-A*11:01	2	0	2	1	1	1	0	0	0	0.523996
EpI_NSP12_427	HLA-I	NSP12	565	574	TMTNRQFHQK	10	Yes	NA	NA	NA	MTNRQFHQK	42843	HLA-A*03:01, HLA-A*11:01, HLA-A*31:01, HLA-A*33:01, HLA-A*68:01	HLA-A*03:01, HLA-A*11:01	2	0	2	1	1	1	0	0	0	0.523996
EpI_NSP12_428	HLA-I	NSP12	566	574	MTNRQFHQK	9	Yes	NA	NA	NA	MTNRQFHQK	42843	HLA-A*03:01, HLA-A*11:01, HLA-A*31:01, HLA-A*33:01, HLA-A*68:01	HLA-A*03:01, HLA-A*11:01, HLA-A*31:01, HLA-A*68:01	3	0	2	3	2	2	1	1	1	1.23975
EpI_NSP12_429	HLA-I	NSP12	568	576	NRQFHQKLL	9	No	NA	NA	NA	NA	NA	NA	HLA-B*39:05, HLA-B*39:09, HLA-C*07:01	1	0	1	2	1	0	0	0	2	0.374883
EpI_NSP12_430	HLA-I	NSP12	569	577	RQFHQKLLK	9	Yes	NA	NA	NA	RQFHQKLLK	55413	HLA-A*03:01, HLA-A*11:01, HLA-A*31:01, HLA-A*33:01, HLA-A*68:01	HLA-A*03:01, HLA-A*11:01, HLA-A*31:01	3	0	2	2	1	1	1	1	1	0.922106
EpI_NSP12_431	HLA-I	NSP12	571	579	FHQKLLKSI	9	No	NA	NA	NA	NA	NA	NA	HLA-B*39:05, HLA-B*39:09	0	0	0	1	0	0	0	0	2	0.154062
EpI_NSP12_432	HLA-I	NSP12	572	579	HQKLLKSI	8	No	NA	NA	NA	NA	NA	NA	HLA-B*08:01	1	0	1	0	0	0	0	0	0	0.103175
EpI_NSP12_433	HLA-I	NSP12	572	580	HQKLLKSIA	9	No	NA	NA	NA	NA	NA	NA	HLA-B*15:04	0	0	0	0	0	0	1	0	0	0.125
EpI_NSP12_434	HLA-I	NSP12	574	582	KLLKSIAAT	9	No	NA	NA	NA	NA	NA	NA	HLA-A*02:01, HLA-A*02:04, HLA-A*02:11, HLA-A*02:22	1	0	1	1	1	1	1	2	3	0.910901
EpI_NSP12_435	HLA-I	NSP12	574	583	KLLKSIAATR	10	No	NA	NA	NA	NA	NA	NA	HLA-A*03:01, HLA-A*31:01	2	0	1	2	1	1	1	1	1	0.818931
EpI_NSP12_436	HLA-I	NSP12	575	583	LLKSIAATR	9	No	NA	NA	NA	NA	NA	NA	HLA-A*31:01, HLA-A*68:01	1	0	0	2	1	1	1	1	1	0.715756
EpI_NSP12_437	HLA-I	NSP12	577	585	KSIAATRGA	9	No	NA	NA	NA	NA	NA	NA	HLA-B*15:04	0	0	0	0	0	0	1	0	0	0.125
EpI_NSP12_438	HLA-I	NSP12	578	587	SIAATRGATV	10	No	NA	NA	NA	NA	NA	NA	HLA-A*68:02	0	0	0	0	0	0	0	0	1	0.047619
EpI_NSP12_439	HLA-I	NSP12	579	587	IAATRGATV	9	No	NA	NA	NA	NA	NA	NA	HLA-B*15:04, HLA-B*35:11, HLA-B*35:12, HLA-B*35:43, HLA-C*01:02, HLA-C*03:04, HLA-C*06:02, HLA-C*07:01, HLA-C*12:03, HLA-C*15:03, HLA-C*16:01	3	0	4	2	6	0	2	1	5	1.42694
EpI_NSP12_440	HLA-I	NSP12	580	588	AATRGATVV	9	No	NA	NA	NA	NA	NA	NA	HLA-C*01:02, HLA-C*03:04, HLA-C*15:03, HLA-C*16:01	0	0	2	0	3	0	0	1	3	0.525677
EpI_NSP12_441	HLA-I	NSP12	581	589	ATRGATVVI	9	No	NA	NA	NA	NA	NA	NA	HLA-B*15:04, HLA-C*01:02, HLA-C*03:04, HLA-C*15:03, HLA-C*16:01	0	0	2	0	3	0	1	1	3	0.650677
EpI_NSP12_442	HLA-I	NSP12	582	589	TRGATVVI	8	No	NA	NA	NA	NA	NA	NA	HLA-B*39:09	0	0	0	1	0	0	0	0	1	0.106443
EpI_NSP12_443	HLA-I	NSP12	584	593	GATVVIGTSK	10	Yes	NA	NA	NA	ATVVIGTSK	5209	HLA-A*03:01, HLA-A*11:01, HLA-A*31:01, HLA-A*68:01	HLA-A*11:01, HLA-A*68:01	1	0	1	1	1	1	0	0	0	0.420822
EpI_NSP12_444	HLA-I	NSP12	585	593	ATVVIGTSK	9	Yes	NA	NA	NA	ATVVIGTSK	5209	HLA-A*03:01, HLA-A*11:01, HLA-A*31:01, HLA-A*68:01	HLA-A*03:01, HLA-A*11:01, HLA-A*68:01	2	0	2	2	2	2	0	0	0	0.841643
EpI_NSP12_445	HLA-I	NSP12	585	594	ATVVIGTSKF	10	Yes	NA	NA	NA	ATVVIGTSK	5209	HLA-A*03:01, HLA-A*11:01, HLA-A*31:01, HLA-A*68:01	HLA-B*15:01, HLA-B*15:04	0	0	0	0	0	0	1	0	1	0.172619
EpI_NSP12_446	HLA-I	NSP12	586	595	TVVIGTSKFY	10	Yes	NA	NA	NA	TVVIGTSKFY	67193	HLA-A*03:01, HLA-A*11:01, HLA-A*31:01, HLA-A*33:01, HLA-A*68:01	HLA-A*29:02, HLA-A*68:01, HLA-B*15:01, HLA-B*15:04, HLA-B*35:11, HLA-B*35:43	0	0	0	2	2	1	2	0	2	0.780532
EpI_NSP12_447	HLA-I	NSP12	586	593	TVVIGTSK	8	Yes	NA	NA	NA	ATVVIGTSK, TVVIGTSKFY	5209, 67193	HLA-A*03:01, HLA-A*11:01, HLA-A*31:01, HLA-A*33:01, HLA-A*68:01	HLA-A*68:01	0	0	0	1	1	1	0	0	0	0.317647
EpI_NSP12_448	HLA-I	NSP12	586	594	TVVIGTSKF	9	Yes	NA	NA	NA	TVVIGTSKFY	67193	HLA-A*03:01, HLA-A*11:01, HLA-A*31:01, HLA-A*33:01, HLA-A*68:01	HLA-B*15:04, HLA-B*35:05, HLA-B*35:11, HLA-B*35:43, HLA-C*01:02, HLA-C*03:04, HLA-C*16:01	0	0	2	0	4	0	3	1	3	0.9595
EpI_NSP12_449	HLA-I	NSP12	587	595	VVIGTSKFY	9	Yes	NA	NA	NA	TVVIGTSKFY	67193	HLA-A*03:01, HLA-A*11:01, HLA-A*31:01, HLA-A*33:01, HLA-A*68:01	HLA-A*29:02, HLA-A*68:01, HLA-B*15:01, HLA-B*15:04, HLA-B*35:05, HLA-B*35:11, HLA-B*35:43	0	0	0	2	2	1	3	0	2	0.905532
EpI_NSP12_450	HLA-I	NSP12	587	594	VVIGTSKF	8	Yes	NA	NA	NA	TVVIGTSKFY	67193	HLA-A*03:01, HLA-A*11:01, HLA-A*31:01, HLA-A*33:01, HLA-A*68:01	HLA-B*15:01, HLA-B*35:11, HLA-B*35:43	0	0	0	0	1	0	1	0	2	0.279062
EpI_NSP12_451	HLA-I	NSP12	593	601	KFYGGWHNM	9	No	NA	NA	NA	NA	NA	NA	HLA-A*02:04, HLA-A*23:01, HLA-A*24:02, HLA-A*31:01, HLA-B*15:04, HLA-C*01:02, HLA-C*03:04, HLA-C*07:01, HLA-C*16:01	3	0	5	3	5	1	2	3	5	1.89678
EpI_NSP12_452	HLA-I	NSP12	593	603	KFYGGWHNMLK	11	No	NA	NA	NA	NA	NA	NA	HLA-A*03:01, HLA-A*11:01, HLA-A*31:01	3	0	2	2	1	1	1	1	1	0.922106
EpI_NSP12_453	HLA-I	NSP12	593	602	KFYGGWHNML	10	No	NA	NA	NA	NA	NA	NA	HLA-A*23:01	0	0	1	0	0	0	0	0	0	0.047619
EpI_NSP12_454	HLA-I	NSP12	594	601	FYGGWHNM	8	No	NA	NA	NA	NA	NA	NA	HLA-A*23:01, HLA-A*24:02	1	0	2	1	1	1	0	1	1	0.627171
EpI_NSP12_455	HLA-I	NSP12	594	602	FYGGWHNML	9	No	NA	NA	NA	NA	NA	NA	HLA-A*23:01, HLA-A*24:02, HLA-B*39:09, HLA-C*01:02, HLA-C*06:02, HLA-C*07:01, HLA-C*07:02	4	0	5	5	5	1	0	2	4	1.66125
EpI_NSP12_456	HLA-I	NSP12	597	606	GWHNMLKTVY	10	No	NA	NA	NA	NA	NA	NA	HLA-A*29:02	0	0	0	1	0	0	0	0	0	0.0588235
EpI_NSP12_457	HLA-I	NSP12	598	606	WHNMLKTVY	9	No	NA	NA	NA	NA	NA	NA	HLA-B*39:05, HLA-B*39:09, HLA-C*07:01	1	0	1	2	1	0	0	0	2	0.374883
EpI_NSP12_458	HLA-I	NSP12	601	609	MLKTVYSDV	9	No	NA	NA	NA	NA	NA	NA	HLA-A*02:22	0	0	0	0	0	0	0	0	1	0.047619
EpI_NSP12_459	HLA-I	NSP12	605	614	VYSDVENPHL	10	No	NA	NA	NA	NA	NA	NA	HLA-A*23:01, HLA-A*24:02	1	0	2	1	1	1	0	1	1	0.627171
EpI_NSP12_460	HLA-I	NSP12	605	615	VYSDVENPHLM	11	No	NA	NA	NA	NA	NA	NA	HLA-A*24:02	1	0	1	1	1	1	0	1	1	0.579552
EpI_NSP12_461	HLA-I	NSP12	606	615	YSDVENPHLM	10	No	NA	NA	NA	NA	NA	NA	HLA-A*01:01, HLA-B*35:12, HLA-B*35:43, HLA-C*01:02, HLA-C*03:04, HLA-C*15:03, HLA-C*16:01	1	0	3	1	5	0	0	1	5	0.90056
EpI_NSP12_462	HLA-I	NSP12	606	614	YSDVENPHL	9	No	NA	NA	NA	NA	NA	NA	HLA-B*35:12, HLA-B*39:05, HLA-B*39:09, HLA-C*01:02, HLA-C*03:04, HLA-C*04:01, HLA-C*05:01, HLA-C*07:01, HLA-C*08:02, HLA-C*15:02, HLA-C*15:03, HLA-C*16:01	3	0	7	4	6	0	0	2	7	1.64379
EpI_NSP12_463	HLA-I	NSP12	607	615	SDVENPHLM	9	No	NA	NA	NA	NA	NA	NA	HLA-B*35:12, HLA-B*39:05, HLA-B*39:09	0	0	0	1	0	0	0	0	3	0.201681
EpI_NSP12_464	HLA-I	NSP12	609	619	VENPHLMGWDY	11	No	NA	NA	NA	NA	NA	NA	HLA-B*18:01, HLA-B*44:03	2	0	1	1	1	0	0	0	0	0.276377
EpI_NSP12_465	HLA-I	NSP12	609	617	VENPHLMGW	9	No	NA	NA	NA	NA	NA	NA	HLA-B*44:03	1	0	1	0	1	0	0	0	0	0.161998
EpI_NSP12_466	HLA-I	NSP12	611	619	NPHLMGWDY	9	No	NA	NA	NA	NA	NA	NA	HLA-B*18:01, HLA-B*35:01, HLA-B*35:05, HLA-B*35:11, HLA-B*35:12, HLA-B*35:43	2	0	1	2	1	0	2	1	2	0.79155
EpI_NSP12_467	HLA-I	NSP12	613	621	HLMGWDYPK	9	Yes	NA	NA	NA	HLMGWDYPK	24254	HLA-A*03:01, HLA-A*11:01, HLA-A*31:01, HLA-A*33:01, HLA-A*68:01	HLA-A*03:01, HLA-A*11:01, HLA-A*31:01, HLA-A*68:01	3	0	2	3	2	2	1	1	1	1.23975
EpI_NSP12_468	HLA-I	NSP12	619	626	YPKCDRAM	8	No	NA	NA	NA	NA	NA	NA	HLA-B*07:02, HLA-B*08:01, HLA-B*35:01, HLA-B*35:05, HLA-B*35:11, HLA-B*35:12, HLA-B*35:43	3	0	3	2	1	0	2	1	2	0.942344
EpI_NSP12_469	HLA-I	NSP12	619	629	YPKCDRAMPNM	11	No	NA	NA	NA	NA	NA	NA	HLA-B*07:02, HLA-B*35:12	1	0	1	1	0	0	0	0	1	0.209617
EpI_NSP12_470	HLA-I	NSP12	623	630	DRAMPNML	8	No	NA	NA	NA	NA	NA	NA	HLA-B*39:05, HLA-B*39:09	0	0	0	1	0	0	0	0	2	0.154062
EpI_NSP12_471	HLA-I	NSP12	623	632	DRAMPNMLRI	10	No	NA	NA	NA	NA	NA	NA	HLA-B*39:05, HLA-B*39:09, HLA-C*07:01	1	0	1	2	1	0	0	0	2	0.374883
EpI_NSP12_472	HLA-I	NSP12	624	632	RAMPNMLRI	9	No	NA	NA	NA	NA	NA	NA	HLA-A*02:04, HLA-B*15:04, HLA-B*35:05, HLA-B*35:11, HLA-B*35:12, HLA-C*01:02, HLA-C*03:04, HLA-C*06:02, HLA-C*07:01, HLA-C*12:03, HLA-C*15:02, HLA-C*15:03, HLA-C*16:01	3	0	5	2	5	0	3	1	5	1.54073
EpI_NSP12_473	HLA-I	NSP12	624	631	RAMPNMLR	8	No	NA	NA	NA	NA	NA	NA	HLA-A*31:01	1	0	0	1	0	0	1	1	1	0.398109
EpI_NSP12_474	HLA-I	NSP12	624	633	RAMPNMLRIM	10	No	NA	NA	NA	NA	NA	NA	HLA-B*07:02, HLA-C*01:02, HLA-C*03:04, HLA-C*15:03, HLA-C*16:01	1	0	3	1	3	0	0	1	3	0.687675
EpI_NSP12_475	HLA-I	NSP12	625	633	AMPNMLRIM	9	No	NA	NA	NA	NA	NA	NA	HLA-B*15:04, HLA-C*01:02	0	0	0	0	1	0	1	0	1	0.231443
EpI_NSP12_476	HLA-I	NSP12	626	633	MPNMLRIM	8	Yes	NA	NA	NA	MPNMLRIMA	42300	HLA-B*07:02, HLA-B*35:01, HLA-B*51:01, HLA-B*53:01, HLA-B*54:01	HLA-B*07:02, HLA-B*08:01, HLA-B*35:01, HLA-B*35:05, HLA-B*35:11, HLA-B*35:12, HLA-B*35:43	3	0	3	2	1	0	2	1	2	0.942344
EpI_NSP12_477	HLA-I	NSP12	626	634	MPNMLRIMA	9	Yes	NA	NA	NA	MPNMLRIMA	42300	HLA-B*07:02, HLA-B*35:01, HLA-B*51:01, HLA-B*53:01, HLA-B*54:01	HLA-B*07:02, HLA-B*35:01, HLA-B*35:05, HLA-B*35:11, HLA-B*35:12, HLA-B*35:43	2	0	2	2	1	0	2	1	2	0.839169
EpI_NSP12_478	HLA-I	NSP12	626	636	MPNMLRIMASL	11	Yes	NA	NA	NA	MPNMLRIMA, NMLRIMASL	42300, 45000	HLA-B*07:02, HLA-B*35:01, HLA-B*51:01, HLA-B*53:01, HLA-B*54:01, HLA-A*02:01, HLA-A*02:02, HLA-A*02:03, HLA-A*02:06, HLA-A*68:02	HLA-B*07:02	1	0	1	1	0	0	0	0	0	0.161998
EpI_NSP12_479	HLA-I	NSP12	628	636	NMLRIMASL	9	Yes	NA	NA	NA	NMLRIMASL	45000	HLA-A*02:01, HLA-A*02:02, HLA-A*02:03, HLA-A*02:06, HLA-A*68:02	HLA-A*02:01, HLA-A*02:04, HLA-A*02:11, HLA-A*02:17, HLA-A*02:22, HLA-B*08:01, HLA-B*39:09, HLA-C*01:02	2	0	2	2	2	1	1	2	6	1.27458
EpI_NSP12_480	HLA-I	NSP12	628	638	NMLRIMASLVL	11	Yes	NA	NA	NA	NMLRIMASL	45000	HLA-A*02:01, HLA-A*02:02, HLA-A*02:03, HLA-A*02:06, HLA-A*68:02	HLA-B*39:09	0	0	0	1	0	0	0	0	1	0.106443
EpI_NSP12_481	HLA-I	NSP12	629	636	MLRIMASL	8	Yes	NA	NA	NA	NMLRIMASL	45000	HLA-A*02:01, HLA-A*02:02, HLA-A*02:03, HLA-A*02:06, HLA-A*68:02	HLA-B*08:01	1	0	1	0	0	0	0	0	0	0.103175
EpI_NSP12_482	HLA-I	NSP12	629	638	MLRIMASLVL	10	No	NA	NA	NA	NA	NA	NA	HLA-B*39:05, HLA-B*39:09, HLA-C*07:01	1	0	1	2	1	0	0	0	2	0.374883
EpI_NSP12_483	HLA-I	NSP12	630	638	LRIMASLVL	9	No	NA	NA	NA	NA	NA	NA	HLA-B*39:05, HLA-B*39:09, HLA-C*07:01	1	0	1	2	1	0	0	0	2	0.374883
EpI_NSP12_484	HLA-I	NSP12	631	639	RIMASLVLA	9	No	NA	NA	NA	NA	NA	NA	HLA-A*02:01, HLA-A*02:04, HLA-A*02:11, HLA-A*02:17, HLA-A*02:22, HLA-C*15:03	1	0	1	1	1	1	1	2	5	1.00614
EpI_NSP12_485	HLA-I	NSP12	631	640	RIMASLVLAR	10	Yes	NA	NA	NA	IMASLVLAR	27453	HLA-A*03:01, HLA-A*11:01, HLA-A*31:01, HLA-A*33:01, HLA-A*68:01	HLA-A*03:01, HLA-A*11:01, HLA-A*31:01, HLA-A*68:01	3	0	2	3	2	2	1	1	1	1.23975
EpI_NSP12_486	HLA-I	NSP12	631	641	RIMASLVLARK	11	Yes	NA	NA	NA	IMASLVLAR	27453	HLA-A*03:01, HLA-A*11:01, HLA-A*31:01, HLA-A*33:01, HLA-A*68:01	HLA-A*03:01, HLA-A*11:01	2	0	2	1	1	1	0	0	0	0.523996
EpI_NSP12_487	HLA-I	NSP12	631	638	RIMASLVL	8	No	NA	NA	NA	NA	NA	NA	HLA-B*39:09, HLA-C*01:02, HLA-C*15:03, HLA-C*16:01	0	0	1	1	2	0	0	0	3	0.366947
EpI_NSP12_488	HLA-I	NSP12	632	640	IMASLVLAR	9	Yes	NA	NA	NA	IMASLVLAR	27453	HLA-A*03:01, HLA-A*11:01, HLA-A*31:01, HLA-A*33:01, HLA-A*68:01	HLA-A*03:01, HLA-A*11:01, HLA-A*31:01, HLA-A*68:01	3	0	2	3	2	2	1	1	1	1.23975
EpI_NSP12_489	HLA-I	NSP12	632	641	IMASLVLARK	10	Yes	NA	NA	NA	IMASLVLAR	27453	HLA-A*03:01, HLA-A*11:01, HLA-A*31:01, HLA-A*33:01, HLA-A*68:01	HLA-A*03:01, HLA-A*11:01	2	0	2	1	1	1	0	0	0	0.523996
EpI_NSP12_490	HLA-I	NSP12	633	641	MASLVLARK	9	No	NA	NA	NA	NA	NA	NA	HLA-A*03:01, HLA-A*11:01, HLA-A*31:01, HLA-A*68:01	3	0	2	3	2	2	1	1	1	1.23975
EpI_NSP12_491	HLA-I	NSP12	633	640	MASLVLAR	8	Yes	NA	NA	NA	IMASLVLAR	27453	HLA-A*03:01, HLA-A*11:01, HLA-A*31:01, HLA-A*33:01, HLA-A*68:01	HLA-A*68:01	0	0	0	1	1	1	0	0	0	0.317647
EpI_NSP12_492	HLA-I	NSP12	643	651	TTCCSLSHR	9	No	NA	NA	NA	NA	NA	NA	HLA-A*31:01, HLA-A*68:01	1	0	0	2	1	1	1	1	1	0.715756
EpI_NSP12_493	HLA-I	NSP12	644	654	TCCSLSHRFYR	11	No	NA	NA	NA	NA	NA	NA	HLA-A*31:01	1	0	0	1	0	0	1	1	1	0.398109
EpI_NSP12_494	HLA-I	NSP12	645	654	CCSLSHRFYR	10	No	NA	NA	NA	NA	NA	NA	HLA-A*31:01	1	0	0	1	0	0	1	1	1	0.398109
EpI_NSP12_495	HLA-I	NSP12	646	654	CSLSHRFYR	9	No	NA	NA	NA	NA	NA	NA	HLA-A*11:01, HLA-A*31:01, HLA-A*68:01	2	0	1	2	1	1	1	1	1	0.818931
EpI_NSP12_496	HLA-I	NSP12	647	655	SLSHRFYRL	9	No	NA	NA	NA	NA	NA	NA	HLA-A*02:01, HLA-A*02:04, HLA-A*02:11, HLA-A*02:17, HLA-A*02:22, HLA-B*08:01, HLA-C*01:02, HLA-C*15:03	2	0	2	1	2	1	1	2	6	1.21576
EpI_NSP12_497	HLA-I	NSP12	647	654	SLSHRFYR	8	No	NA	NA	NA	NA	NA	NA	HLA-A*31:01	1	0	0	1	0	0	1	1	1	0.398109
EpI_NSP12_498	HLA-I	NSP12	648	655	LSHRFYRL	8	No	NA	NA	NA	NA	NA	NA	HLA-B*08:01	1	0	1	0	0	0	0	0	0	0.103175
EpI_NSP12_499	HLA-I	NSP12	653	662	YRLANECAQV	10	No	NA	NA	NA	NA	NA	NA	HLA-A*02:04, HLA-A*02:22	0	0	0	0	0	0	0	0	2	0.0952381
EpI_NSP12_500	HLA-I	NSP12	653	663	YRLANECAQVL	11	No	NA	NA	NA	NA	NA	NA	HLA-B*39:05, HLA-B*39:09, HLA-C*07:01	1	0	1	2	1	0	0	0	2	0.374883
EpI_NSP12_501	HLA-I	NSP12	654	662	RLANECAQV	9	No	NA	NA	NA	NA	NA	NA	HLA-A*02:01, HLA-A*02:04, HLA-A*02:11, HLA-A*02:17, HLA-A*02:22	1	0	1	1	1	1	1	2	4	0.95852
EpI_NSP12_502	HLA-I	NSP12	654	663	RLANECAQVL	10	No	NA	NA	NA	NA	NA	NA	HLA-A*02:22	0	0	0	0	0	0	0	0	1	0.047619
EpI_NSP12_503	HLA-I	NSP12	655	663	LANECAQVL	9	No	NA	NA	NA	NA	NA	NA	HLA-B*35:01, HLA-B*35:05, HLA-B*35:11, HLA-B*35:12, HLA-B*35:43, HLA-C*01:02, HLA-C*03:03, HLA-C*03:04, HLA-C*05:01, HLA-C*08:02, HLA-C*12:03, HLA-C*15:02, HLA-C*15:03, HLA-C*16:01	3	0	7	2	5	0	2	2	5	1.62208
EpI_NSP12_504	HLA-I	NSP12	657	666	NECAQVLSEM	10	Yes	NA	NA	NA	NECAQVLSEM	43560	HLA-B*18:01, HLA-B*40:01, HLA-B*44:02, HLA-A*44:03, HLA-B*45:01	HLA-B*18:01	1	0	0	1	0	0	0	0	0	0.114379
EpI_NSP12_505	HLA-I	NSP12	658	666	ECAQVLSEM	9	Yes	NA	NA	NA	NECAQVLSEM	43560	HLA-B*18:01, HLA-B*40:01, HLA-B*44:02, HLA-A*44:03, HLA-B*45:01	HLA-A*68:02, HLA-B*35:11, HLA-B*35:43	0	0	0	0	1	0	1	0	2	0.279062
EpI_NSP12_506	HLA-I	NSP12	660	668	AQVLSEMVM	9	No	NA	NA	NA	NA	NA	NA	HLA-B*15:01, HLA-B*15:04, HLA-B*39:05, HLA-B*39:09, HLA-C*03:04	0	0	1	1	1	0	1	1	4	0.591853
EpI_NSP12_507	HLA-I	NSP12	664	673	SEMVMCGGSL	10	Yes	NA	NA	NA	SEMVMCGGSL	57559	HLA-B*18:01, HLA-B*40:01, HLA-A*40:02, HLA-B*44:02, HLA-A*44:03, HLA-B*45:01	HLA-B*40:02, HLA-B*44:03	1	0	1	0	2	1	0	0	1	0.468441
EpI_NSP12_508	HLA-I	NSP12	664	674	SEMVMCGGSLY	11	Yes	NA	NA	NA	EMVMCGGSLY, MVMCGGSLY, SEMVMCGGSL	13427, 42971, 57559	HLA-A*01:01, HLA-A*26:01, HLA-A*29:02, HLA-A*30:02, HLA-A*03:01, HLA-A*11:01, HLA-A*31:01, HLA-A*33:01, HLA-A*68:01, HLA-B*18:01, HLA-B*40:01, HLA-A*40:02, HLA-B*44:02, HLA-A*44:03, HLA-B*45:01	HLA-B*44:03	1	0	1	0	1	0	0	0	0	0.161998
EpI_NSP12_509	HLA-I	NSP12	665	674	EMVMCGGSLY	10	Yes	NA	NA	NA	EMVMCGGSLY, MVMCGGSLY	13427, 42971	HLA-A*01:01, HLA-A*26:01, HLA-A*29:02, HLA-A*30:02, HLA-A*03:01, HLA-A*11:01, HLA-A*31:01, HLA-A*33:01, HLA-A*68:01	HLA-A*29:02, HLA-A*68:01, HLA-B*15:01, HLA-B*35:43	0	0	0	2	2	1	0	0	2	0.530532
EpI_NSP12_510	HLA-I	NSP12	666	675	MVMCGGSLYV	10	Yes	NA	NA	NA	MVMCGGSLY, MVMCGGSLYV, VMCGGSLYV	42971, 42972, 69929	HLA-A*03:01, HLA-A*11:01, HLA-A*31:01, HLA-A*33:01, HLA-A*68:01, HLA-A*02:01, HLA-A*02:02, HLA-A*02:03, HLA-A*02:06, HLA-A*68:02	HLA-A*02:01, HLA-A*02:04, HLA-A*02:11, HLA-A*02:17, HLA-A*02:22, HLA-A*68:02, HLA-C*15:03	1	0	1	1	1	1	1	2	6	1.05376
EpI_NSP12_511	HLA-I	NSP12	666	674	MVMCGGSLY	9	Yes	NA	NA	NA	EMVMCGGSLY, MVMCGGSLY, MVMCGGSLYV	13427, 42971, 42972	HLA-A*01:01, HLA-A*26:01, HLA-A*29:02, HLA-A*30:02, HLA-A*03:01, HLA-A*11:01, HLA-A*31:01, HLA-A*33:01, HLA-A*68:01, HLA-A*02:01, HLA-A*02:02, HLA-A*02:03, HLA-A*02:06, HLA-A*68:02	HLA-A*03:01, HLA-A*11:01, HLA-A*29:02, HLA-A*68:01, HLA-B*15:01, HLA-B*15:04, HLA-B*35:01, HLA-B*35:05, HLA-B*35:11, HLA-B*35:43, HLA-C*07:01, HLA-C*16:01	4	0	5	5	5	2	3	1	2	2.0299
EpI_NSP12_512	HLA-I	NSP12	666	676	MVMCGGSLYVK	11	Yes	NA	NA	NA	MVMCGGSLY, MVMCGGSLYV, VMCGGSLYV, VMCGGSLYVK	42971, 42972, 69929, 69930	HLA-A*03:01, HLA-A*11:01, HLA-A*31:01, HLA-A*33:01, HLA-A*68:01, HLA-A*02:01, HLA-A*02:02, HLA-A*02:03, HLA-A*02:06, HLA-A*68:02	HLA-A*11:01	1	0	1	0	0	0	0	0	0	0.103175
EpI_NSP12_513	HLA-I	NSP12	667	675	VMCGGSLYV	9	Yes	NA	NA	NA	MVMCGGSLYV, VMCGGSLYV, VMCGGSLYVK	42972, 69929, 69930	HLA-A*02:01, HLA-A*02:02, HLA-A*02:03, HLA-A*02:06, HLA-A*68:02,HLA-A*03:01, HLA-A*11:01, HLA-A*31:01	HLA-A*02:01, HLA-A*02:04, HLA-A*02:11, HLA-A*02:17, HLA-A*02:22	1	0	1	1	1	1	1	2	4	0.95852
EpI_NSP12_514	HLA-I	NSP12	667	676	VMCGGSLYVK	10	Yes	NA	NA	NA	VMCGGSLYV, VMCGGSLYVK	69929, 69930	HLA-A*02:01, HLA-A*02:02, HLA-A*02:03, HLA-A*02:06, HLA-A*68:02,HLA-A*03:01, HLA-A*11:01, HLA-A*31:01	HLA-A*03:01, HLA-A*11:01	2	0	2	1	1	1	0	0	0	0.523996
EpI_NSP12_515	HLA-I	NSP12	667	674	VMCGGSLY	8	Yes	NA	NA	NA	EMVMCGGSLY, MVMCGGSLY, MVMCGGSLYV, VMCGGSLYV, VMCGGSLYVK	13427, 42971, 42972, 69929, 69930	HLA-A*01:01, HLA-A*26:01, HLA-A*29:02, HLA-A*30:02, HLA-A*03:01, HLA-A*11:01, HLA-A*31:01, HLA-A*33:01, HLA-A*68:01, HLA-A*02:01, HLA-A*02:02, HLA-A*02:03, HLA-A*02:06, HLA-A*68:02	HLA-A*29:02, HLA-B*15:01, HLA-B*15:04	0	0	0	1	0	0	1	0	1	0.231443
EpI_NSP12_516	HLA-I	NSP12	674	682	YVKPGGTSS	9	No	NA	NA	NA	NA	NA	NA	HLA-B*15:04, HLA-B*35:43	0	0	0	0	1	0	1	0	1	0.231443
EpI_NSP12_517	HLA-I	NSP12	679	689	GTSSGDATTAY	11	Yes	NA	NA	NA	SSGDATTAY, TSSGDATTAY	61021, 66426	HLA-A*01:01, HLA-A*26:01, HLA-A*29:02,, HLA-A*30:02	HLA-A*01:01, HLA-A*29:02	1	0	1	2	1	0	0	0	0	0.279645
EpI_NSP12_518	HLA-I	NSP12	680	689	TSSGDATTAY	10	Yes	NA	NA	NA	SSGDATTAY, TSSGDATTAY	61021, 66426	HLA-A*01:01, HLA-A*26:01, HLA-A*29:02,, HLA-A*30:02	HLA-A*01:01, HLA-A*29:02, HLA-B*15:01, HLA-B*15:04, HLA-B*35:01, HLA-B*35:05, HLA-B*35:11, HLA-B*35:43	2	0	2	3	2	0	3	1	2	1.08182
EpI_NSP12_519	HLA-I	NSP12	681	689	SSGDATTAY	9	Yes	NA	NA	NA	SSGDATTAY, TSSGDATTAY	61021, 66426	HLA-A*01:01, HLA-A*26:01, HLA-A*29:02,, HLA-A*30:02	HLA-A*01:01, HLA-A*29:02, HLA-B*15:01, HLA-B*15:04, HLA-B*35:01, HLA-B*35:05, HLA-B*35:11, HLA-B*35:43, HLA-C*07:01, HLA-C*16:01	3	0	4	4	4	0	3	1	2	1.40908
EpI_NSP12_520	HLA-I	NSP12	684	693	DATTAYANSV	10	No	NA	NA	NA	NA	NA	NA	HLA-A*68:02	0	0	0	0	0	0	0	0	1	0.047619
EpI_NSP12_521	HLA-I	NSP12	685	693	ATTAYANSV	9	No	NA	NA	NA	NA	NA	NA	HLA-A*68:02, HLA-C*15:03, HLA-C*16:01	0	0	1	0	1	0	0	0	2	0.201681
EpI_NSP12_522	HLA-I	NSP12	685	694	ATTAYANSVF	10	No	NA	NA	NA	NA	NA	NA	HLA-B*15:01	0	0	0	0	0	0	0	0	1	0.047619
EpI_NSP12_523	HLA-I	NSP12	686	693	TTAYANSV	8	No	NA	NA	NA	NA	NA	NA	HLA-A*68:02	0	0	0	0	0	0	0	0	1	0.047619
EpI_NSP12_524	HLA-I	NSP12	686	694	TTAYANSVF	9	No	NA	NA	NA	NA	NA	NA	HLA-B*15:01, HLA-B*15:04, HLA-B*35:05, HLA-B*35:11, HLA-B*35:12, HLA-B*35:43, HLA-C*01:02, HLA-C*03:04, HLA-C*15:03, HLA-C*16:01	0	0	2	0	4	0	3	1	6	1.10236
EpI_NSP12_525	HLA-I	NSP12	687	696	TAYANSVFNI	10	Yes	NA	NA	NA	AYANSVFNI	5729	HLA-A*23:01	HLA-A*68:02	0	0	0	0	0	0	0	0	1	0.047619
EpI_NSP12_526	HLA-I	NSP12	687	694	TAYANSVF	8	No	NA	NA	NA	NA	NA	NA	HLA-B*35:01, HLA-B*35:05, HLA-B*35:11, HLA-B*35:12, HLA-B*35:43, HLA-C*01:02, HLA-C*03:04, HLA-C*16:01	1	0	3	1	4	0	2	2	4	1.15523
EpI_NSP12_527	HLA-I	NSP12	688	696	AYANSVFNI	9	Yes	NA	NA	NA	AYANSVFNI	5729	HLA-A*23:01	HLA-A*23:01, HLA-A*24:02, HLA-C*07:01	2	0	3	2	2	1	0	1	1	0.847993
EpI_NSP12_528	HLA-I	NSP12	689	697	YANSVFNIC	9	No	NA	NA	NA	NA	NA	NA	HLA-C*03:04	0	0	1	0	1	0	0	1	1	0.265173
EpI_NSP12_529	HLA-I	NSP12	689	696	YANSVFNI	8	Yes	NA	NA	NA	AYANSVFNI	5729	HLA-A*23:01	HLA-C*15:03	0	0	0	0	0	0	0	0	1	0.047619
EpI_NSP12_530	HLA-I	NSP12	691	700	NSVFNICQAV	10	No	NA	NA	NA	NA	NA	NA	HLA-A*68:02	0	0	0	0	0	0	0	0	1	0.047619
EpI_NSP12_531	HLA-I	NSP12	692	700	SVFNICQAV	9	No	NA	NA	NA	NA	NA	NA	HLA-A*02:01, HLA-A*02:04, HLA-A*02:11, HLA-A*02:17, HLA-A*02:22, HLA-A*68:02, HLA-C*01:02, HLA-C*03:04, HLA-C*15:03, HLA-C*16:01	1	0	3	1	4	1	1	3	8	1.53182
EpI_NSP12_532	HLA-I	NSP12	695	704	NICQAVTANV	10	No	NA	NA	NA	NA	NA	NA	HLA-A*68:02	0	0	0	0	0	0	0	0	1	0.047619
EpI_NSP12_533	HLA-I	NSP12	698	706	QAVTANVNA	9	No	NA	NA	NA	NA	NA	NA	HLA-A*68:02	0	0	0	0	0	0	0	0	1	0.047619
EpI_NSP12_534	HLA-I	NSP12	699	707	AVTANVNAL	9	No	NA	NA	NA	NA	NA	NA	HLA-A*02:22, HLA-B*15:04, HLA-B*35:11, HLA-B*35:12, HLA-B*35:43, HLA-B*39:09, HLA-C*01:02, HLA-C*03:04, HLA-C*15:03, HLA-C*16:01	0	0	2	1	4	0	2	1	7	1.0838
EpI_NSP12_535	HLA-I	NSP12	699	708	AVTANVNALL	10	No	NA	NA	NA	NA	NA	NA	HLA-A*02:22	0	0	0	0	0	0	0	0	1	0.047619
EpI_NSP12_536	HLA-I	NSP12	700	708	VTANVNALL	9	No	NA	NA	NA	NA	NA	NA	HLA-A*02:04, HLA-A*02:22, HLA-A*68:02, HLA-B*15:04, HLA-B*35:12, HLA-C*01:02, HLA-C*03:04, HLA-C*07:01, HLA-C*15:02, HLA-C*15:03, HLA-C*16:01	1	0	4	1	4	0	1	1	7	1.10959
EpI_NSP12_537	HLA-I	NSP12	700	707	VTANVNAL	8	No	NA	NA	NA	NA	NA	NA	HLA-C*01:02, HLA-C*03:04, HLA-C*16:01	0	0	2	0	3	0	0	1	2	0.478058
EpI_NSP12_538	HLA-I	NSP12	706	714	ALLSTDGNK	9	Yes	NA	NA	NA	ALLSTDGNK	2738	HLA-A*03:01, HLA-A*11:01	HLA-A*03:01, HLA-A*11:01	2	0	2	1	1	1	0	0	0	0.523996
EpI_NSP12_539	HLA-I	NSP12	707	715	LLSTDGNKI	9	No	NA	NA	NA	NA	NA	NA	HLA-A*02:22	0	0	0	0	0	0	0	0	1	0.047619
EpI_NSP12_540	HLA-I	NSP12	709	719	STDGNKIADKY	11	No	NA	NA	NA	NA	NA	NA	HLA-A*01:01	1	0	1	1	1	0	0	0	0	0.220822
EpI_NSP12_541	HLA-I	NSP12	709	718	STDGNKIADK	10	No	NA	NA	NA	NA	NA	NA	HLA-A*11:01, HLA-A*68:01	1	0	1	1	1	1	0	0	0	0.420822
EpI_NSP12_542	HLA-I	NSP12	711	719	DGNKIADKY	9	No	NA	NA	NA	NA	NA	NA	HLA-B*35:05, HLA-B*35:11, HLA-B*35:43	0	0	0	0	1	0	2	0	1	0.356443
EpI_NSP12_543	HLA-I	NSP12	714	723	KIADKYVRNL	10	No	NA	NA	NA	NA	NA	NA	HLA-A*02:22	0	0	0	0	0	0	0	0	1	0.047619
EpI_NSP12_544	HLA-I	NSP12	714	721	KIADKYVR	8	No	NA	NA	NA	NA	NA	NA	HLA-A*31:01	1	0	0	1	0	0	1	1	1	0.398109
EpI_NSP12_545	HLA-I	NSP12	715	723	IADKYVRNL	9	No	NA	NA	NA	NA	NA	NA	HLA-B*35:05, HLA-B*35:11, HLA-B*35:12, HLA-C*01:02, HLA-C*03:04, HLA-C*04:01, HLA-C*05:01, HLA-C*07:01, HLA-C*08:02, HLA-C*15:02, HLA-C*15:03, HLA-C*16:01	3	0	7	3	6	0	2	2	5	1.73973
EpI_NSP12_546	HLA-I	NSP12	718	727	KYVRNLQHRL	10	No	NA	NA	NA	NA	NA	NA	HLA-A*23:01, HLA-A*24:02	1	0	2	1	1	1	0	1	1	0.627171
EpI_NSP12_547	HLA-I	NSP12	718	726	KYVRNLQHR	9	No	NA	NA	NA	NA	NA	NA	HLA-A*31:01	1	0	0	1	0	0	1	1	1	0.398109
EpI_NSP12_548	HLA-I	NSP12	719	728	YVRNLQHRLY	10	No	NA	NA	NA	NA	NA	NA	HLA-A*29:02, HLA-B*15:01, HLA-B*15:04, HLA-B*35:11, HLA-B*35:43, HLA-C*07:01	1	0	1	2	2	0	2	0	2	0.683707
EpI_NSP12_549	HLA-I	NSP12	719	726	YVRNLQHR	8	No	NA	NA	NA	NA	NA	NA	HLA-A*31:01	1	0	0	1	0	0	1	1	1	0.398109
EpI_NSP12_550	HLA-I	NSP12	719	727	YVRNLQHRL	9	No	NA	NA	NA	NA	NA	NA	HLA-B*08:01, HLA-B*15:04, HLA-B*35:05, HLA-B*35:11, HLA-B*35:12, HLA-B*35:43, HLA-C*01:02, HLA-C*03:04, HLA-C*07:01, HLA-C*15:03, HLA-C*16:01	2	0	4	1	5	0	3	1	5	1.37873
EpI_NSP12_551	HLA-I	NSP12	720	727	VRNLQHRL	8	No	NA	NA	NA	NA	NA	NA	HLA-C*07:01	1	0	1	1	1	0	0	0	0	0.220822
EpI_NSP12_552	HLA-I	NSP12	720	728	VRNLQHRLY	9	No	NA	NA	NA	NA	NA	NA	HLA-C*07:01	1	0	1	1	1	0	0	0	0	0.220822
EpI_NSP12_553	HLA-I	NSP12	726	733	RLYECLYR	8	Yes	NA	NA	NA	RLYECLYRNR	54834	HLA-A*03:01, HLA-A*11:01, HLA-A*31:01, HLA-A*33:01, HLA-A*68:01	HLA-A*03:01, HLA-A*31:01	2	0	1	2	1	1	1	1	1	0.818931
EpI_NSP12_554	HLA-I	NSP12	726	735	RLYECLYRNR	10	Yes	NA	NA	NA	RLYECLYRNR	54834	HLA-A*03:01, HLA-A*11:01, HLA-A*31:01, HLA-A*33:01, HLA-A*68:01	HLA-A*03:01, HLA-A*31:01	2	0	1	2	1	1	1	1	1	0.818931
EpI_NSP12_555	HLA-I	NSP12	731	741	LYRNRDVDTDF	11	No	NA	NA	NA	NA	NA	NA	HLA-A*24:02	1	0	1	1	1	1	0	1	1	0.579552
EpI_NSP12_556	HLA-I	NSP12	732	741	YRNRDVDTDF	10	No	NA	NA	NA	NA	NA	NA	HLA-B*39:05, HLA-B*39:09, HLA-C*07:01	1	0	1	2	1	0	0	0	2	0.374883
EpI_NSP12_557	HLA-I	NSP12	733	741	RNRDVDTDF	9	No	NA	NA	NA	NA	NA	NA	HLA-B*15:04	0	0	0	0	0	0	1	0	0	0.125
EpI_NSP12_558	HLA-I	NSP12	734	742	NRDVDTDFV	9	No	NA	NA	NA	NA	NA	NA	HLA-B*39:05, HLA-B*39:09	0	0	0	1	0	0	0	0	2	0.154062
EpI_NSP12_559	HLA-I	NSP12	736	746	DVDTDFVNEFY	11	No	NA	NA	NA	NA	NA	NA	HLA-A*01:01	1	0	1	1	1	0	0	0	0	0.220822
EpI_NSP12_560	HLA-I	NSP12	738	745	DTDFVNEF	8	No	NA	NA	NA	NA	NA	NA	HLA-A*01:01	1	0	1	1	1	0	0	0	0	0.220822
EpI_NSP12_561	HLA-I	NSP12	738	746	DTDFVNEFY	9	No	NA	NA	NA	NA	NA	NA	HLA-A*01:01, HLA-A*68:01, HLA-B*35:05, HLA-B*35:11, HLA-B*35:43	1	0	1	2	3	1	2	0	1	0.894911
EpI_NSP12_562	HLA-I	NSP12	738	747	DTDFVNEFYA	10	No	NA	NA	NA	NA	NA	NA	HLA-A*01:01, HLA-A*68:02	1	0	1	1	1	0	0	0	1	0.268441
EpI_NSP12_563	HLA-I	NSP12	738	748	DTDFVNEFYAY	11	No	NA	NA	NA	NA	NA	NA	HLA-A*01:01	1	0	1	1	1	0	0	0	0	0.220822
EpI_NSP12_564	HLA-I	NSP12	740	748	DFVNEFYAY	9	No	NA	NA	NA	NA	NA	NA	HLA-A*29:02, HLA-B*35:01, HLA-B*35:05, HLA-B*35:11, HLA-B*35:43	1	0	1	2	1	0	2	1	1	0.688375
EpI_NSP12_565	HLA-I	NSP12	741	749	FVNEFYAYL	9	No	NA	NA	NA	NA	NA	NA	HLA-A*02:01, HLA-A*02:04, HLA-A*02:11, HLA-A*02:17, HLA-A*02:22, HLA-A*68:02, HLA-B*35:12, HLA-B*35:43, HLA-B*39:09, HLA-C*01:02, HLA-C*03:04, HLA-C*04:01, HLA-C*05:01, HLA-C*06:02, HLA-C*07:01, HLA-C*15:02, HLA-C*15:03, HLA-C*16:01	5	0	8	6	9	1	1	4	12	2.88196
EpI_NSP12_566	HLA-I	NSP12	741	748	FVNEFYAY	8	No	NA	NA	NA	NA	NA	NA	HLA-A*29:02, HLA-B*15:01, HLA-B*35:01, HLA-B*35:05, HLA-B*35:11, HLA-B*35:43	1	0	1	2	1	0	2	1	2	0.735994
EpI_NSP12_567	HLA-I	NSP12	741	750	FVNEFYAYLR	10	No	NA	NA	NA	NA	NA	NA	HLA-A*31:01, HLA-A*68:01	1	0	0	2	1	1	1	1	1	0.715756
EpI_NSP12_568	HLA-I	NSP12	743	750	NEFYAYLR	8	No	NA	NA	NA	NA	NA	NA	HLA-B*18:01	1	0	0	1	0	0	0	0	0	0.114379
EpI_NSP12_569	HLA-I	NSP12	743	751	NEFYAYLRK	9	No	NA	NA	NA	NA	NA	NA	HLA-B*18:01	1	0	0	1	0	0	0	0	0	0.114379
EpI_NSP12_570	HLA-I	NSP12	743	752	NEFYAYLRKH	10	No	NA	NA	NA	NA	NA	NA	HLA-B*18:01	1	0	0	1	0	0	0	0	0	0.114379
EpI_NSP12_571	HLA-I	NSP12	743	753	NEFYAYLRKHF	11	No	NA	NA	NA	NA	NA	NA	HLA-B*18:01, HLA-B*44:03	2	0	1	1	1	0	0	0	0	0.276377
EpI_NSP12_572	HLA-I	NSP12	744	753	EFYAYLRKHF	10	No	NA	NA	NA	NA	NA	NA	HLA-A*23:01	0	0	1	0	0	0	0	0	0	0.047619
EpI_NSP12_573	HLA-I	NSP12	745	753	FYAYLRKHF	9	No	NA	NA	NA	NA	NA	NA	HLA-A*23:01, HLA-A*24:02, HLA-C*07:01	2	0	3	2	2	1	0	1	1	0.847993
EpI_NSP12_574	HLA-I	NSP12	746	755	YAYLRKHFSM	10	No	NA	NA	NA	NA	NA	NA	HLA-B*08:01, HLA-C*01:02, HLA-C*03:04, HLA-C*16:01	1	0	3	0	3	0	0	1	2	0.581232
EpI_NSP12_575	HLA-I	NSP12	746	753	YAYLRKHF	8	No	NA	NA	NA	NA	NA	NA	HLA-B*35:11, HLA-B*35:43, HLA-C*16:01	0	0	1	0	2	0	1	0	1	0.337885
EpI_NSP12_576	HLA-I	NSP12	747	756	AYLRKHFSMM	10	No	NA	NA	NA	NA	NA	NA	HLA-A*23:01, HLA-A*24:02	1	0	2	1	1	1	0	1	1	0.627171
EpI_NSP12_577	HLA-I	NSP12	747	755	AYLRKHFSM	9	No	NA	NA	NA	NA	NA	NA	HLA-A*24:02, HLA-B*08:01, HLA-C*07:01	3	0	3	2	2	1	0	1	1	0.903548
EpI_NSP12_578	HLA-I	NSP12	748	756	YLRKHFSMM	9	No	NA	NA	NA	NA	NA	NA	HLA-A*02:04, HLA-A*02:11, HLA-A*02:22, HLA-B*07:02, HLA-B*08:01, HLA-B*15:01, HLA-B*15:04, HLA-B*35:11, HLA-B*35:43, HLA-C*01:02, HLA-C*03:04, HLA-C*07:01, HLA-C*15:03, HLA-C*16:01	3	0	5	2	5	0	3	2	7	1.74708
EpI_NSP12_579	HLA-I	NSP12	748	755	YLRKHFSM	8	No	NA	NA	NA	NA	NA	NA	HLA-B*08:01	1	0	1	0	0	0	0	0	0	0.103175
EpI_NSP12_580	HLA-I	NSP12	748	757	YLRKHFSMMI	10	No	NA	NA	NA	NA	NA	NA	HLA-B*08:01	1	0	1	0	0	0	0	0	0	0.103175
EpI_NSP12_581	HLA-I	NSP12	749	756	LRKHFSMM	8	No	NA	NA	NA	NA	NA	NA	HLA-B*08:01	1	0	1	0	0	0	0	0	0	0.103175
EpI_NSP12_582	HLA-I	NSP12	749	757	LRKHFSMMI	9	No	NA	NA	NA	NA	NA	NA	HLA-C*06:02, HLA-C*07:01	2	0	2	2	2	0	0	0	0	0.441643
EpI_NSP12_583	HLA-I	NSP12	750	758	RKHFSMMIL	9	No	NA	NA	NA	NA	NA	NA	HLA-B*39:05, HLA-B*39:09, HLA-C*07:01	1	0	1	2	1	0	0	0	2	0.374883
EpI_NSP12_584	HLA-I	NSP12	751	758	KHFSMMIL	8	No	NA	NA	NA	NA	NA	NA	HLA-B*39:05, HLA-B*39:09	0	0	0	1	0	0	0	0	2	0.154062
EpI_NSP12_585	HLA-I	NSP12	755	763	MMILSDDAV	9	No	NA	NA	NA	NA	NA	NA	HLA-A*02:01, HLA-A*02:04, HLA-A*02:11, HLA-A*02:22	1	0	1	1	1	1	1	2	3	0.910901
EpI_NSP12_586	HLA-I	NSP12	755	764	MMILSDDAVV	10	No	NA	NA	NA	NA	NA	NA	HLA-A*02:22	0	0	0	0	0	0	0	0	1	0.047619
EpI_NSP12_587	HLA-I	NSP12	756	764	MILSDDAVV	9	No	NA	NA	NA	NA	NA	NA	HLA-A*02:01, HLA-A*02:04, HLA-A*02:11, HLA-A*02:22, HLA-C*03:04	1	0	2	1	2	1	1	3	4	1.17607
EpI_NSP12_588	HLA-I	NSP12	757	764	ILSDDAVV	8	Yes	NA	NA	NA	ILSDDAVVCY	27312	HLA-A*01:01, HLA-A*29:02, HLA-A*30:02	HLA-A*02:01, HLA-A*02:22	1	0	1	1	1	1	0	1	2	0.627171
EpI_NSP12_589	HLA-I	NSP12	757	765	ILSDDAVVC	9	Yes	NA	NA	NA	ILSDDAVVCY	27312	HLA-A*01:01, HLA-A*29:02, HLA-A*30:02	HLA-A*02:04, HLA-A*02:22	0	0	0	0	0	0	0	0	2	0.0952381
EpI_NSP12_590	HLA-I	NSP12	757	766	ILSDDAVVCF	10	No	NA	NA	NA	NA	NA	NA	HLA-B*15:01	0	0	0	0	0	0	0	0	1	0.047619
EpI_NSP12_591	HLA-I	NSP12	758	766	LSDDAVVCF	9	No	NA	NA	NA	NA	NA	NA	HLA-A*01:01, HLA-B*35:01, HLA-B*35:05, HLA-B*35:11, HLA-B*35:12, HLA-C*01:02, HLA-C*04:01, HLA-C*05:01, HLA-C*08:02, HLA-C*15:02, HLA-C*15:03, HLA-C*16:01	4	0	7	4	5	0	2	2	4	1.74767
EpI_NSP12_592	HLA-I	NSP12	761	770	DAVVCFNSTY	10	No	NA	NA	NA	NA	NA	NA	HLA-B*35:01, HLA-B*35:05, HLA-B*35:11, HLA-B*35:43	1	0	1	1	1	0	2	1	1	0.629552
EpI_NSP12_593	HLA-I	NSP12	762	770	AVVCFNSTY	9	No	NA	NA	NA	NA	NA	NA	HLA-A*11:01, HLA-A*29:02, HLA-A*68:01, HLA-B*15:01, HLA-B*15:04, HLA-B*35:05, HLA-B*35:11, HLA-B*35:43	1	0	1	2	2	1	3	0	2	1.00871
EpI_NSP12_594	HLA-I	NSP12	767	775	NSTYASQGL	9	No	NA	NA	NA	NA	NA	NA	HLA-A*68:02	0	0	0	0	0	0	0	0	1	0.047619
EpI_NSP12_595	HLA-I	NSP12	767	776	NSTYASQGLV	10	No	NA	NA	NA	NA	NA	NA	HLA-A*68:02	0	0	0	0	0	0	0	0	1	0.047619
EpI_NSP12_596	HLA-I	NSP12	768	776	STYASQGLV	9	No	NA	NA	NA	NA	NA	NA	HLA-A*68:02, HLA-C*03:04, HLA-C*15:03	0	0	1	0	1	0	0	1	3	0.360411
EpI_NSP12_597	HLA-I	NSP12	769	779	TYASQGLVASI	11	No	NA	NA	NA	NA	NA	NA	HLA-A*24:02	1	0	1	1	1	1	0	1	1	0.579552
EpI_NSP12_598	HLA-I	NSP12	770	779	YASQGLVASI	10	No	NA	NA	NA	NA	NA	NA	HLA-A*68:02, HLA-C*01:02, HLA-C*03:03, HLA-C*03:04	0	0	2	0	2	0	0	1	3	0.466853
EpI_NSP12_599	HLA-I	NSP12	770	778	YASQGLVAS	9	No	NA	NA	NA	NA	NA	NA	HLA-B*35:01, HLA-B*35:05, HLA-B*35:11, HLA-B*35:43, HLA-C*03:04	1	0	2	1	2	0	2	2	2	0.894725
EpI_NSP12_600	HLA-I	NSP12	771	780	ASQGLVASIK	10	No	NA	NA	NA	NA	NA	NA	HLA-A*03:01, HLA-A*11:01	2	0	2	1	1	1	0	0	0	0.523996
EpI_NSP12_601	HLA-I	NSP12	771	779	ASQGLVASI	9	No	NA	NA	NA	NA	NA	NA	HLA-B*15:04, HLA-C*01:02, HLA-C*03:04, HLA-C*15:02, HLA-C*15:03, HLA-C*16:01	0	0	3	0	3	0	1	1	3	0.698296
EpI_NSP12_602	HLA-I	NSP12	772	780	SQGLVASIK	9	No	NA	NA	NA	NA	NA	NA	HLA-A*11:01	1	0	1	0	0	0	0	0	0	0.103175
EpI_NSP12_603	HLA-I	NSP12	774	783	GLVASIKNFK	10	Yes	NA	NA	NA	GLVASIKNFK	21180	HLA-A*03:01, HLA-A*11:01, HLA-A*68:01	HLA-A*03:01, HLA-A*11:01, HLA-A*68:01	2	0	2	2	2	2	0	0	0	0.841643
EpI_NSP12_604	HLA-I	NSP12	774	782	GLVASIKNF	9	Yes	NA	NA	NA	GLVASIKNFK	21180	HLA-A*03:01, HLA-A*11:01, HLA-A*68:01	HLA-B*15:01, HLA-B*15:04	0	0	0	0	0	0	1	0	1	0.172619
EpI_NSP12_605	HLA-I	NSP12	775	783	LVASIKNFK	9	Yes	NA	NA	NA	GLVASIKNFK	21180	HLA-A*03:01, HLA-A*11:01, HLA-A*68:01	HLA-A*03:01, HLA-A*11:01, HLA-A*31:01, HLA-A*68:01	3	0	2	3	2	2	1	1	1	1.23975
EpI_NSP12_606	HLA-I	NSP12	777	787	ASIKNFKSVLY	11	No	NA	NA	NA	NA	NA	NA	HLA-A*01:01	1	0	1	1	1	0	0	0	0	0.220822
EpI_NSP12_607	HLA-I	NSP12	777	785	ASIKNFKSV	9	No	NA	NA	NA	NA	NA	NA	HLA-B*15:04, HLA-C*01:02, HLA-C*03:04, HLA-C*15:03, HLA-C*16:01	0	0	2	0	3	0	1	1	3	0.650677
EpI_NSP12_608	HLA-I	NSP12	778	787	SIKNFKSVLY	10	No	NA	NA	NA	NA	NA	NA	HLA-A*03:01, HLA-A*11:01, HLA-A*29:02, HLA-B*15:01, HLA-B*15:04	2	0	2	2	1	1	1	0	1	0.755439
EpI_NSP12_609	HLA-I	NSP12	778	788	SIKNFKSVLYY	11	No	NA	NA	NA	NA	NA	NA	HLA-A*11:01	1	0	1	0	0	0	0	0	0	0.103175
EpI_NSP12_610	HLA-I	NSP12	778	785	SIKNFKSV	8	No	NA	NA	NA	NA	NA	NA	HLA-B*08:01	1	0	1	0	0	0	0	0	0	0.103175
EpI_NSP12_611	HLA-I	NSP12	778	786	SIKNFKSVL	9	No	NA	NA	NA	NA	NA	NA	HLA-B*08:01, HLA-B*15:04, HLA-C*01:02, HLA-C*03:04, HLA-C*16:01	1	0	3	0	3	0	1	1	2	0.706232
EpI_NSP12_612	HLA-I	NSP12	779	788	IKNFKSVLYY	10	No	NA	NA	NA	NA	NA	NA	HLA-A*29:02	0	0	0	1	0	0	0	0	0	0.0588235
EpI_NSP12_613	HLA-I	NSP12	779	787	IKNFKSVLY	9	No	NA	NA	NA	NA	NA	NA	HLA-B*15:04, HLA-C*07:01	1	0	1	1	1	0	1	0	0	0.345822
EpI_NSP12_614	HLA-I	NSP12	780	788	KNFKSVLYY	9	No	NA	NA	NA	NA	NA	NA	HLA-A*29:02, HLA-B*15:01, HLA-B*15:04, HLA-C*06:02, HLA-C*07:01	2	0	2	3	2	0	1	0	1	0.673086
EpI_NSP12_615	HLA-I	NSP12	781	788	NFKSVLYY	8	No	NA	NA	NA	NA	NA	NA	HLA-A*29:02	0	0	0	1	0	0	0	0	0	0.0588235
EpI_NSP12_616	HLA-I	NSP12	784	792	SVLYYQNNV	9	No	NA	NA	NA	NA	NA	NA	HLA-A*02:01, HLA-A*02:04, HLA-A*02:11, HLA-A*02:22, HLA-A*68:02, HLA-C*15:03	1	0	1	1	1	1	1	2	5	1.00614
EpI_NSP12_617	HLA-I	NSP12	784	793	SVLYYQNNVF	10	No	NA	NA	NA	NA	NA	NA	HLA-B*15:01, HLA-B*15:04, HLA-B*35:43	0	0	0	0	1	0	1	0	2	0.279062
EpI_NSP12_618	HLA-I	NSP12	785	794	VLYYQNNVFM	10	No	NA	NA	NA	NA	NA	NA	HLA-A*02:01, HLA-A*02:04, HLA-A*02:11	1	0	1	1	1	1	1	2	2	0.863282
EpI_NSP12_619	HLA-I	NSP12	785	792	VLYYQNNV	8	No	NA	NA	NA	NA	NA	NA	HLA-A*02:04	0	0	0	0	0	0	0	0	1	0.047619
EpI_NSP12_620	HLA-I	NSP12	785	793	VLYYQNNVF	9	No	NA	NA	NA	NA	NA	NA	HLA-A*02:04, HLA-B*15:01, HLA-B*15:04, HLA-B*35:05, HLA-B*35:11, HLA-B*35:43, HLA-C*01:02, HLA-C*03:04, HLA-C*07:01, HLA-C*15:03, HLA-C*16:01	1	0	3	1	5	0	3	1	6	1.32318
EpI_NSP12_621	HLA-I	NSP12	786	793	LYYQNNVF	8	No	NA	NA	NA	NA	NA	NA	HLA-A*23:01, HLA-A*24:02	1	0	2	1	1	1	0	1	1	0.627171
EpI_NSP12_622	HLA-I	NSP12	786	794	LYYQNNVFM	9	No	NA	NA	NA	NA	NA	NA	HLA-A*23:01, HLA-A*24:02, HLA-B*39:09, HLA-C*01:02, HLA-C*03:04, HLA-C*04:01, HLA-C*06:02, HLA-C*07:01, HLA-C*16:01	4	0	7	5	7	1	0	3	5	2.03287
EpI_NSP12_623	HLA-I	NSP12	787	794	YYQNNVFM	8	No	NA	NA	NA	NA	NA	NA	HLA-C*04:01	1	0	1	1	1	0	0	1	1	0.379552
EpI_NSP12_624	HLA-I	NSP12	788	796	YQNNVFMSE	9	No	NA	NA	NA	NA	NA	NA	HLA-B*15:04	0	0	0	0	0	0	1	0	0	0.125
EpI_NSP12_625	HLA-I	NSP12	790	798	NNVFMSEAK	9	No	NA	NA	NA	NA	NA	NA	HLA-A*68:01	0	0	0	1	1	1	0	0	0	0.317647
EpI_NSP12_626	HLA-I	NSP12	791	798	NVFMSEAK	8	No	NA	NA	NA	NA	NA	NA	HLA-A*68:01	0	0	0	1	1	1	0	0	0	0.317647
EpI_NSP12_627	HLA-I	NSP12	792	800	VFMSEAKCW	9	No	NA	NA	NA	NA	NA	NA	HLA-A*23:01, HLA-A*24:02	1	0	2	1	1	1	0	1	1	0.627171
EpI_NSP12_628	HLA-I	NSP12	802	812	ETDLTKGPHEF	11	No	NA	NA	NA	NA	NA	NA	HLA-A*01:01	1	0	1	1	1	0	0	0	0	0.220822
EpI_NSP12_629	HLA-I	NSP12	804	812	DLTKGPHEF	9	No	NA	NA	NA	NA	NA	NA	HLA-B*35:05, HLA-B*35:11, HLA-B*35:12, HLA-B*35:43	0	0	0	0	1	0	2	0	2	0.404062
EpI_NSP12_630	HLA-I	NSP12	808	818	GPHEFCSQHTM	11	No	NA	NA	NA	NA	NA	NA	HLA-B*35:12	0	0	0	0	0	0	0	0	1	0.047619
EpI_NSP12_631	HLA-I	NSP12	810	818	HEFCSQHTM	9	No	NA	NA	NA	NA	NA	NA	HLA-B*15:04, HLA-B*18:01, HLA-B*35:11, HLA-B*35:12, HLA-B*35:43, HLA-B*39:05, HLA-B*39:09, HLA-B*40:02, HLA-B*44:03, HLA-C*07:01	3	0	2	3	4	1	2	0	5	1.36176
EpI_NSP12_632	HLA-I	NSP12	810	819	HEFCSQHTML	10	Yes	NA	NA	NA	EFCSQHTML	11957	HLA-A*23:01	HLA-B*39:05, HLA-B*40:02, HLA-B*44:03	1	0	1	0	2	1	0	0	2	0.51606
EpI_NSP12_633	HLA-I	NSP12	812	820	FCSQHTMLV	9	No	NA	NA	NA	NA	NA	NA	HLA-C*05:01, HLA-C*15:02, HLA-C*15:03	1	0	2	1	1	0	0	0	1	0.31606
EpI_NSP12_634	HLA-I	NSP12	813	821	CSQHTMLVK	9	No	NA	NA	NA	NA	NA	NA	HLA-A*11:01	1	0	1	0	0	0	0	0	0	0.103175
EpI_NSP12_635	HLA-I	NSP12	816	826	HTMLVKQGDDY	11	No	NA	NA	NA	NA	NA	NA	HLA-A*01:01	1	0	1	1	1	0	0	0	0	0.220822
EpI_NSP12_636	HLA-I	NSP12	817	826	TMLVKQGDDY	10	No	NA	NA	NA	NA	NA	NA	HLA-B*15:01	0	0	0	0	0	0	0	0	1	0.047619
EpI_NSP12_637	HLA-I	NSP12	818	827	MLVKQGDDYV	10	No	NA	NA	NA	NA	NA	NA	HLA-A*02:01, HLA-A*02:11, HLA-A*02:22	1	0	1	1	1	1	1	2	2	0.863282
EpI_NSP12_638	HLA-I	NSP12	818	826	MLVKQGDDY	9	No	NA	NA	NA	NA	NA	NA	HLA-A*29:02, HLA-B*15:01, HLA-B*15:04, HLA-B*35:05, HLA-B*35:11, HLA-B*35:43	0	0	0	1	1	0	3	0	2	0.587885
EpI_NSP12_639	HLA-I	NSP12	818	828	MLVKQGDDYVY	11	No	NA	NA	NA	NA	NA	NA	HLA-A*29:02	0	0	0	1	0	0	0	0	0	0.0588235
EpI_NSP12_640	HLA-I	NSP12	819	828	LVKQGDDYVY	10	No	NA	NA	NA	NA	NA	NA	HLA-A*29:02, HLA-B*15:01, HLA-B*15:04, HLA-B*35:05, HLA-B*35:11, HLA-B*35:43	0	0	0	1	1	0	3	0	2	0.587885
EpI_NSP12_641	HLA-I	NSP12	821	829	KQGDDYVYL	9	No	NA	NA	NA	NA	NA	NA	HLA-A*02:04, HLA-A*02:22, HLA-B*15:04, HLA-B*39:05, HLA-B*39:09	0	0	0	1	0	0	1	0	4	0.3743
EpI_NSP12_642	HLA-I	NSP12	821	828	KQGDDYVY	8	No	NA	NA	NA	NA	NA	NA	HLA-B*15:01	0	0	0	0	0	0	0	0	1	0.047619
EpI_NSP12_643	HLA-I	NSP12	821	831	KQGDDYVYLPY	11	Yes	NA	NA	NA	GDDYVYLPY, QGDDYVYLPY	18958, 50840	HLA-A*01:01, HLA-A*26:01, HLA-A*29:02, HLA-A*30:02	HLA-B*15:01	0	0	0	0	0	0	0	0	1	0.047619
EpI_NSP12_644	HLA-I	NSP12	822	831	QGDDYVYLPY	10	Yes	NA	NA	NA	GDDYVYLPY, QGDDYVYLPY	18958, 50840	HLA-A*01:01, HLA-A*26:01, HLA-A*29:02, HLA-A*30:02	HLA-A*01:01, HLA-A*29:02	1	0	1	2	1	0	0	0	0	0.279645
EpI_NSP12_645	HLA-I	NSP12	823	831	GDDYVYLPY	9	Yes	NA	NA	NA	GDDYVYLPY, QGDDYVYLPY	18958, 50840	HLA-A*01:01, HLA-A*26:01, HLA-A*29:02, HLA-A*30:02	HLA-A*29:02	0	0	0	1	0	0	0	0	0	0.0588235
EpI_NSP12_646	HLA-I	NSP12	824	831	DDYVYLPY	8	Yes	NA	NA	NA	GDDYVYLPY, QGDDYVYLPY	18958, 50840	HLA-A*01:01, HLA-A*26:01, HLA-A*29:02, HLA-A*30:02	HLA-B*18:01	1	0	0	1	0	0	0	0	0	0.114379
EpI_NSP12_647	HLA-I	NSP12	826	836	YVYLPYPDPSR	11	No	NA	NA	NA	NA	NA	NA	HLA-A*68:01	0	0	0	1	1	1	0	0	0	0.317647
EpI_NSP12_648	HLA-I	NSP12	827	837	VYLPYPDPSRI	11	Yes	NA	NA	NA	LPYPDPSRI	38782	HLA-B*07:02, HLA-A*11:01	HLA-A*23:01, HLA-A*24:02	1	0	2	1	1	1	0	1	1	0.627171
EpI_NSP12_649	HLA-I	NSP12	827	836	VYLPYPDPSR	10	No	NA	NA	NA	NA	NA	NA	HLA-A*31:01	1	0	0	1	0	0	1	1	1	0.398109
EpI_NSP12_650	HLA-I	NSP12	828	837	YLPYPDPSRI	10	Yes	NA	NA	NA	LPYPDPSRI	38782	HLA-B*07:02, HLA-A*11:01	HLA-A*02:04, HLA-A*02:11, HLA-A*02:22, HLA-B*35:05, HLA-B*35:11, HLA-B*35:12, HLA-B*35:43, HLA-C*01:02, HLA-C*03:04, HLA-C*15:03	0	0	1	0	3	0	3	2	7	1.15465
EpI_NSP12_651	HLA-I	NSP12	828	836	YLPYPDPSR	9	No	NA	NA	NA	NA	NA	NA	HLA-A*68:01	0	0	0	1	1	1	0	0	0	0.317647
EpI_NSP12_652	HLA-I	NSP12	828	838	YLPYPDPSRIL	11	Yes	NA	NA	NA	LPYPDPSRI, LPYPDPSRIL	38782, 38783	HLA-B*07:02, HLA-A*11:01, HLA-B*51:01	HLA-C*01:02	0	0	0	0	1	0	0	0	1	0.106443
EpI_NSP12_653	HLA-I	NSP12	829	838	LPYPDPSRIL	10	Yes	NA	NA	NA	LPYPDPSRI, LPYPDPSRIL	38782, 38783	HLA-B*07:02, HLA-A*11:01, HLA-B*51:01	HLA-B*07:02, HLA-B*35:01, HLA-B*35:05, HLA-B*35:11, HLA-B*35:12, HLA-B*35:43, HLA-C*01:02, HLA-C*03:04	2	0	3	2	3	0	2	2	4	1.21078
EpI_NSP12_654	HLA-I	NSP12	829	837	LPYPDPSRI	9	Yes	NA	NA	NA	LPYPDPSRI, LPYPDPSRIL	38782, 38783	HLA-B*07:02, HLA-A*11:01, HLA-B*51:01	HLA-B*35:05, HLA-B*35:11, HLA-B*35:12, HLA-B*35:43, HLA-B*39:05, HLA-B*39:09, HLA-B*51:01, HLA-C*01:02, HLA-C*03:04, HLA-C*07:01, HLA-C*15:03, HLA-C*16:01	2	0	4	3	6	0	2	2	7	1.63655
EpI_NSP12_655	HLA-I	NSP12	830	838	PYPDPSRIL	9	Yes	NA	NA	NA	LPYPDPSRIL	38783	HLA-B*07:02, HLA-B*51:01	HLA-C*04:01	1	0	1	1	1	0	0	1	1	0.379552
EpI_NSP12_656	HLA-I	NSP12	831	838	YPDPSRIL	8	Yes	NA	NA	NA	LPYPDPSRIL	38783	HLA-B*07:02, HLA-B*51:01	HLA-B*07:02, HLA-B*35:05, HLA-B*35:11, HLA-B*35:12, HLA-B*35:43, HLA-B*39:05, HLA-B*39:09, HLA-C*01:02, HLA-C*03:04, HLA-C*05:01	2	0	3	3	4	0	2	1	6	1.31256
EpI_NSP12_657	HLA-I	NSP12	831	839	YPDPSRILG	9	No	NA	NA	NA	NA	NA	NA	HLA-B*35:05, HLA-B*35:11, HLA-B*35:12, HLA-B*35:43	0	0	0	0	1	0	2	0	2	0.404062
EpI_NSP12_658	HLA-I	NSP12	831	840	YPDPSRILGA	10	No	NA	NA	NA	NA	NA	NA	HLA-B*35:05, HLA-B*35:11, HLA-B*35:12	0	0	0	0	0	0	2	0	1	0.297619
EpI_NSP12_659	HLA-I	NSP12	835	843	SRILGAGCF	9	No	NA	NA	NA	NA	NA	NA	HLA-B*39:05, HLA-B*39:09, HLA-C*07:01	1	0	1	2	1	0	0	0	2	0.374883
EpI_NSP12_660	HLA-I	NSP12	836	844	RILGAGCFV	9	Yes	NA	NA	NA	RILGAGCFV	54183	HLA-A*02:01,HLA-A*02:02,HLA-A*02:03,HLA-A*02:06	HLA-A*02:01, HLA-A*02:04, HLA-A*02:11, HLA-A*02:17, HLA-A*02:22, HLA-C*15:03	1	0	1	1	1	1	1	2	5	1.00614
EpI_NSP12_661	HLA-I	NSP12	846	854	DIVKTDGTL	9	No	NA	NA	NA	NA	NA	NA	HLA-B*35:11, HLA-B*35:12, HLA-B*35:43	0	0	0	0	1	0	1	0	2	0.279062
EpI_NSP12_662	HLA-I	NSP12	847	855	IVKTDGTLM	9	No	NA	NA	NA	NA	NA	NA	HLA-B*15:04, HLA-B*35:05, HLA-B*35:11, HLA-B*35:43, HLA-C*01:02, HLA-C*03:04, HLA-C*15:03, HLA-C*16:01	0	0	2	0	4	0	3	1	4	1.00712
EpI_NSP12_663	HLA-I	NSP12	847	856	IVKTDGTLMI	10	No	NA	NA	NA	NA	NA	NA	HLA-C*15:03	0	0	0	0	0	0	0	0	1	0.047619
EpI_NSP12_664	HLA-I	NSP12	848	856	VKTDGTLMI	9	No	NA	NA	NA	NA	NA	NA	HLA-B*39:05, HLA-B*39:09, HLA-C*07:01	1	0	1	2	1	0	0	0	2	0.374883
EpI_NSP12_665	HLA-I	NSP12	849	859	KTDGTLMIERF	11	No	NA	NA	NA	NA	NA	NA	HLA-A*01:01	1	0	1	1	1	0	0	0	0	0.220822
EpI_NSP12_666	HLA-I	NSP12	849	858	KTDGTLMIER	10	No	NA	NA	NA	NA	NA	NA	HLA-A*11:01, HLA-A*31:01	2	0	1	1	0	0	1	1	1	0.501284
EpI_NSP12_667	HLA-I	NSP12	849	856	KTDGTLMI	8	No	NA	NA	NA	NA	NA	NA	HLA-C*05:01, HLA-C*15:03	1	0	1	1	1	0	0	0	1	0.268441
EpI_NSP12_668	HLA-I	NSP12	852	860	GTLMIERFV	9	No	NA	NA	NA	NA	NA	NA	HLA-C*15:03	0	0	0	0	0	0	0	0	1	0.047619
EpI_NSP12_669	HLA-I	NSP12	853	862	TLMIERFVSL	10	Yes	NA	NA	NA	LMIERFVSL	38043	HLA-A*02:01,HLA-A*02:02,HLA-A*02:03,HLA-A*02:06,HLA-A*68:02	HLA-A*02:01, HLA-A*02:04, HLA-A*02:11, HLA-A*02:22, HLA-B*08:01	2	0	2	1	1	1	1	2	3	1.01408
EpI_NSP12_670	HLA-I	NSP12	854	862	LMIERFVSL	9	Yes	NA	NA	NA	LMIERFVSL	38043	HLA-A*02:01,HLA-A*02:02,HLA-A*02:03,HLA-A*02:06,HLA-A*68:02	HLA-A*02:01, HLA-A*02:04, HLA-A*02:11, HLA-A*02:17, HLA-A*02:22, HLA-B*08:01, HLA-B*15:01, HLA-B*15:04, HLA-B*35:12, HLA-B*39:05, HLA-B*39:09, HLA-C*01:02, HLA-C*03:04, HLA-C*07:01, HLA-C*15:03, HLA-C*16:01	3	0	5	3	5	1	2	3	11	2.18249
EpI_NSP12_671	HLA-I	NSP12	855	862	MIERFVSL	8	Yes	NA	NA	NA	LMIERFVSL	38043	HLA-A*02:01,HLA-A*02:02,HLA-A*02:03,HLA-A*02:06,HLA-A*68:02	HLA-B*08:01, HLA-C*01:02	1	0	1	0	1	0	0	0	1	0.209617
EpI_NSP12_672	HLA-I	NSP12	856	864	IERFVSLAI	9	No	NA	NA	NA	NA	NA	NA	HLA-B*18:01, HLA-B*39:05, HLA-B*40:02	1	0	0	1	1	1	0	0	2	0.468441
EpI_NSP12_673	HLA-I	NSP12	857	864	ERFVSLAI	8	No	NA	NA	NA	NA	NA	NA	HLA-B*39:05, HLA-B*39:09	0	0	0	1	0	0	0	0	2	0.154062
EpI_NSP12_674	HLA-I	NSP12	858	867	RFVSLAIDAY	10	Yes	NA	NA	NA	FVSLAIDAY	18289	HLA-A*01:01, HLA-A*26:01, HLA-A*29:02, HLA-A*30:02	HLA-A*29:02, HLA-B*15:01, HLA-B*15:04	0	0	0	1	0	0	1	0	1	0.231443
EpI_NSP12_675	HLA-I	NSP12	859	867	FVSLAIDAY	9	Yes	NA	NA	NA	FVSLAIDAY	18289	HLA-A*01:01, HLA-A*26:01, HLA-A*29:02, HLA-A*30:02	HLA-A*01:01, HLA-A*29:02, HLA-A*68:01, HLA-B*15:01, HLA-B*15:04, HLA-B*35:01, HLA-B*35:05, HLA-B*35:11, HLA-B*35:12, HLA-B*35:43, HLA-C*16:01	2	0	3	4	4	1	3	1	3	1.55352
EpI_NSP12_676	HLA-I	NSP12	861	869	SLAIDAYPL	9	Yes	NA	NA	NA	SLAIDAYPL	59001	HLA-A*02:01, HLA-B*15:01, HLA-A*69:01	HLA-A*02:01, HLA-A*02:04, HLA-A*02:11, HLA-A*02:17, HLA-A*02:22, HLA-B*39:09, HLA-C*01:02, HLA-C*03:04	1	0	2	2	3	1	1	3	7	1.43658
EpI_NSP12_677	HLA-I	NSP12	861	870	SLAIDAYPLT	10	Yes	NA	NA	NA	SLAIDAYPL	59001	HLA-A*02:01, HLA-B*15:01, HLA-A*69:01	HLA-A*02:04, HLA-A*02:22	0	0	0	0	0	0	0	0	2	0.0952381
EpI_NSP12_678	HLA-I	NSP12	861	871	SLAIDAYPLTK	11	Yes	NA	NA	NA	AIDAYPLTK, SLAIDAYPL	1865, 59001	HLA-A*03:01, HLA-A*11:01, HLA-A*02:01, HLA-B*15:01, HLA-A*69:01	HLA-A*03:01, HLA-A*11:01	2	0	2	1	1	1	0	0	0	0.523996
EpI_NSP12_679	HLA-I	NSP12	862	871	LAIDAYPLTK	10	Yes	NA	NA	NA	AIDAYPLTK	1865	HLA-A*03:01, HLA-A*11:01	HLA-A*03:01, HLA-A*11:01, HLA-A*68:01	2	0	2	2	2	2	0	0	0	0.841643
EpI_NSP12_680	HLA-I	NSP12	862	869	LAIDAYPL	8	Yes	NA	NA	NA	SLAIDAYPL	59001	HLA-A*02:01, HLA-B*15:01, HLA-A*69:01	HLA-B*35:12, HLA-C*03:03, HLA-C*03:04, HLA-C*16:01	0	0	3	0	2	0	0	1	2	0.466853
EpI_NSP12_681	HLA-I	NSP12	863	871	AIDAYPLTK	9	Yes	NA	NA	NA	AIDAYPLTK	1865	HLA-A*03:01, HLA-A*11:01	HLA-A*03:01, HLA-A*11:01	2	0	2	1	1	1	0	0	0	0.523996
EpI_NSP12_682	HLA-I	NSP12	867	877	YPLTKHPNQEY	11	Yes	NA	NA	NA	LTKHPNQEY	39993	HLA-B*29:02, HLA-A*30:02	HLA-B*35:01, HLA-B*35:05, HLA-B*35:11, HLA-B*35:12, HLA-B*35:43	1	0	1	1	1	0	2	1	2	0.677171
EpI_NSP12_683	HLA-I	NSP12	867	875	YPLTKHPNQ	9	No	NA	NA	NA	NA	NA	NA	HLA-B*35:05	0	0	0	0	0	0	1	0	0	0.125
EpI_NSP12_684	HLA-I	NSP12	869	877	LTKHPNQEY	9	Yes	NA	NA	NA	LTKHPNQEY	39993	HLA-B*29:02, HLA-A*30:02	HLA-B*15:01, HLA-B*15:04, HLA-B*35:05, HLA-B*35:11, HLA-B*35:43	0	0	0	0	1	0	3	0	2	0.529062
EpI_NSP12_685	HLA-I	NSP12	872	881	HPNQEYADVF	10	No	NA	NA	NA	NA	NA	NA	HLA-B*35:01, HLA-B*35:05, HLA-B*35:11, HLA-B*35:12, HLA-B*35:43	1	0	1	1	1	0	2	1	2	0.677171
EpI_NSP12_686	HLA-I	NSP12	872	880	HPNQEYADV	9	No	NA	NA	NA	NA	NA	NA	HLA-B*35:05, HLA-B*35:11, HLA-B*35:12, HLA-B*35:43	0	0	0	0	1	0	2	0	2	0.404062
EpI_NSP12_687	HLA-I	NSP12	874	883	NQEYADVFHL	10	Yes	NA	NA	NA	QEYADVFHL	50726	HLA-B*18:01, HLA-B*40:01, HLA-A*40:02, HLA-B*44:02, HLA-A*44:03, HLA-B*45:01	HLA-B*39:05, HLA-B*39:09	0	0	0	1	0	0	0	0	2	0.154062
EpI_NSP12_688	HLA-I	NSP12	875	884	QEYADVFHLY	10	Yes	NA	NA	NA	EYADVFHLY, QEYADVFHL, QEYADVFHLY	14968, 50726, 50727	HLA-A*24:02, HLA-A*23:01, HLA-A*26:01, HLA-A*29:02, HLA-A*30:02, HLA-B*18:01, HLA-B*40:01, HLA-A*40:02, HLA-B*44:02, HLA-A*44:03, HLA-B*45:01	HLA-A*29:02, HLA-B*15:04, HLA-B*18:01, HLA-B*44:03, HLA-C*07:01	3	0	2	3	2	0	1	0	0	0.681022
EpI_NSP12_689	HLA-I	NSP12	875	883	QEYADVFHL	9	Yes	NA	NA	NA	QEYADVFHL, QEYADVFHLY	50726, 50727	HLA-B*18:01, HLA-B*40:01, HLA-A*40:02, HLA-B*44:02, HLA-A*44:03, HLA-B*45:01	HLA-B*15:04, HLA-B*35:12, HLA-B*39:05, HLA-B*39:09, HLA-B*40:02, HLA-B*44:03	1	0	1	1	2	1	1	0	4	0.795121
EpI_NSP12_690	HLA-I	NSP12	875	885	QEYADVFHLYL	11	Yes	NA	NA	NA	EYADVFHLY, EYADVFHLYL, QEYADVFHL, QEYADVFHLY	14968, 14969, 50726, 50727	HLA-A*24:02, HLA-A*23:01, HLA-A*26:01, HLA-A*29:02, HLA-A*30:02, HLA-A*01:01, HLA-B*18:01, HLA-B*40:01, HLA-A*40:02, HLA-B*44:02, HLA-A*44:03, HLA-B*45:01	HLA-B*40:02, HLA-B*44:03	1	0	1	0	2	1	0	0	1	0.468441
EpI_NSP12_691	HLA-I	NSP12	876	884	EYADVFHLY	9	Yes	NA	NA	NA	EYADVFHLY, EYADVFHLYL, QEYADVFHLY	14968, 14969, 50727	HLA-A*24:02, HLA-A*23:01, HLA-A*26:01, HLA-A*29:02, HLA-A*30:02, HLA-A*01:01, HLA-B*18:01, HLA-B*40:01, HLA-A*40:02, HLA-B*44:02, HLA-A*44:03, HLA-B*45:01	HLA-A*23:01, HLA-A*24:02, HLA-A*29:02, HLA-A*68:01, HLA-B*35:05, HLA-B*35:11, HLA-B*35:43, HLA-B*39:05, HLA-C*07:01	2	0	3	4	4	2	2	1	3	1.62852
EpI_NSP12_692	HLA-I	NSP12	876	885	EYADVFHLYL	10	Yes	NA	NA	NA	EYADVFHLY, EYADVFHLYL	14968, 14969	HLA-A*24:02, HLA-A*23:01, HLA-A*26:01, HLA-A*29:02, HLA-A*30:02, HLA-A*01:01	HLA-A*23:01	0	0	1	0	0	0	0	0	0	0.047619
EpI_NSP12_693	HLA-I	NSP12	876	883	EYADVFHL	8	Yes	NA	NA	NA	EYADVFHLY, EYADVFHLYL, QEYADVFHL, QEYADVFHLY	14968, 14969, 50726, 50727	HLA-A*24:02, HLA-A*23:01, HLA-A*26:01, HLA-A*29:02, HLA-A*30:02, HLA-A*01:01, HLA-B*18:01, HLA-B*40:01, HLA-A*40:02, HLA-B*44:02, HLA-A*44:03, HLA-B*45:01	HLA-A*24:02	1	0	1	1	1	1	0	1	1	0.579552
EpI_NSP12_694	HLA-I	NSP12	877	884	YADVFHLY	8	Yes	NA	NA	NA	EYADVFHLY, EYADVFHLYL, QEYADVFHLY	14968, 14969, 50727	HLA-A*24:02, HLA-A*23:01, HLA-A*26:01, HLA-A*29:02, HLA-A*30:02, HLA-A*01:01, HLA-B*18:01, HLA-B*40:01, HLA-A*40:02, HLA-B*44:02, HLA-A*44:03, HLA-B*45:01	HLA-A*01:01, HLA-A*29:02, HLA-B*35:01, HLA-B*35:05, HLA-B*35:11, HLA-B*35:43	2	0	2	3	2	0	2	1	1	0.909197
EpI_NSP12_695	HLA-I	NSP12	877	885	YADVFHLYL	9	Yes	NA	NA	NA	EYADVFHLYL	14969	HLA-A*24:02, HLA-A*23:01, HLA-A*26:01, HLA-A*29:02, HLA-A*30:02, HLA-A*01:01	HLA-A*01:01, HLA-A*02:01, HLA-A*02:04, HLA-A*02:11, HLA-A*02:17, HLA-B*35:01, HLA-B*35:05, HLA-B*35:11, HLA-B*35:12, HLA-B*39:05, HLA-B*39:09, HLA-C*01:02, HLA-C*03:03, HLA-C*03:04, HLA-C*04:01, HLA-C*05:01, HLA-C*07:01, HLA-C*08:02, HLA-C*15:02, HLA-C*15:03, HLA-C*16:01	6	0	11	7	8	1	3	5	10	3.34624
EpI_NSP12_696	HLA-I	NSP12	877	887	YADVFHLYLQY	11	Yes	NA	NA	NA	ADVFHLYLQY, DVFHLYLQY	786, 10589	HLA-B*44:02, HLA-B*44:03, HLA-A*31:01, HLA-A*68:01	HLA-A*01:01, HLA-A*29:02	1	0	1	2	1	0	0	0	0	0.279645
EpI_NSP12_697	HLA-I	NSP12	878	887	ADVFHLYLQY	10	Yes	NA	NA	NA	ADVFHLYLQY, DVFHLYLQY	786, 10589	HLA-B*44:02, HLA-B*44:03, HLA-A*31:01, HLA-A*68:01	HLA-A*29:02, HLA-B*44:03	1	0	1	1	1	0	0	0	0	0.220822
EpI_NSP12_698	HLA-I	NSP12	879	887	DVFHLYLQY	9	Yes	NA	NA	NA	ADVFHLYLQY, DVFHLYLQY	786, 10589	HLA-B*44:02, HLA-B*44:03, HLA-A*31:01, HLA-A*68:01	HLA-A*29:02, HLA-A*68:01, HLA-B*35:01, HLA-B*35:05, HLA-B*35:11, HLA-B*35:43	1	0	1	3	2	1	2	1	1	1.00602
EpI_NSP12_699	HLA-I	NSP12	880	888	VFHLYLQYI	9	Yes	NA	NA	NA	VFHLYLQYI, VFHLYLQYIR	68482, 68483	HLA-A*01:01, HLA-A*23:01, HLA-A*24:02, HLA-A*26:01, HLA-A*03:01, HLA-A*11:01, HLA-A*31:01, HLA-A33:01,HLA-A68:01	HLA-A*23:01, HLA-A*24:02	1	0	2	1	1	1	0	1	1	0.627171
EpI_NSP12_700	HLA-I	NSP12	880	887	VFHLYLQY	8	Yes	NA	NA	NA	ADVFHLYLQY, DVFHLYLQY, VFHLYLQYI, VFHLYLQYIR	786, 10589, 68482, 68483	HLA-B*44:02, HLA-B*44:03, HLA-A*31:01, HLA-A*68:01, HLA-A*01:01, HLA-A*23:01, HLA-A*24:02, HLA-A*26:01, HLA-A*03:01, HLA-A*11:01, HLA-A*31:01, HLA-A33:01,HLA-A68:01	HLA-A*29:02	0	0	0	1	0	0	0	0	0	0.0588235
EpI_NSP12_701	HLA-I	NSP12	880	889	VFHLYLQYIR	10	Yes	NA	NA	NA	VFHLYLQYI, VFHLYLQYIR	68482, 68483	HLA-A*01:01, HLA-A*23:01, HLA-A*24:02, HLA-A*26:01, HLA-A*03:01, HLA-A*11:01, HLA-A*31:01, HLA-A33:01,HLA-A68:01	HLA-A*31:01	1	0	0	1	0	0	1	1	1	0.398109
EpI_NSP12_702	HLA-I	NSP12	882	890	HLYLQYIRK	9	Yes	NA	NA	NA	HLYLQYIRK	24322	HLA-A*03:01, HLA-A*11:01, HLA-A*31:01, HLA-A68:01	HLA-A*03:01, HLA-A*11:01, HLA-A*31:01, HLA-A*68:01	3	0	2	3	2	2	1	1	1	1.23975
EpI_NSP12_703	HLA-I	NSP12	883	891	LYLQYIRKL	9	No	NA	NA	NA	NA	NA	NA	HLA-A*23:01, HLA-A*24:02, HLA-C*04:01, HLA-C*06:02, HLA-C*07:01, HLA-C*07:02	5	0	6	5	5	1	0	3	3	1.82792
EpI_NSP12_704	HLA-I	NSP12	887	895	YIRKLHDEL	9	No	NA	NA	NA	NA	NA	NA	HLA-B*15:04, HLA-B*35:11, HLA-B*35:12, HLA-B*35:43, HLA-C*01:02, HLA-C*03:04, HLA-C*15:03, HLA-C*16:01	0	0	2	0	4	0	2	1	5	0.929739
EpI_NSP12_705	HLA-I	NSP12	890	900	KLHDELTGHML	11	No	NA	NA	NA	NA	NA	NA	HLA-A*02:01, HLA-A*02:04, HLA-A*02:22	1	0	1	1	1	1	0	1	3	0.67479
EpI_NSP12_706	HLA-I	NSP12	890	899	KLHDELTGHM	10	No	NA	NA	NA	NA	NA	NA	HLA-A*02:04, HLA-A*02:11, HLA-A*02:22, HLA-B*15:01, HLA-B*15:04	0	0	0	0	0	0	2	1	3	0.503968
EpI_NSP12_707	HLA-I	NSP12	890	898	KLHDELTGH	9	No	NA	NA	NA	NA	NA	NA	HLA-B*15:04	0	0	0	0	0	0	1	0	0	0.125
EpI_NSP12_708	HLA-I	NSP12	891	899	LHDELTGHM	9	No	NA	NA	NA	NA	NA	NA	HLA-B*39:05, HLA-B*39:09, HLA-C*04:01	1	0	1	2	1	0	0	1	3	0.533613
EpI_NSP12_709	HLA-I	NSP12	891	900	LHDELTGHML	10	No	NA	NA	NA	NA	NA	NA	HLA-B*39:05, HLA-B*39:09	0	0	0	1	0	0	0	0	2	0.154062
EpI_NSP12_710	HLA-I	NSP12	892	900	HDELTGHML	9	No	NA	NA	NA	NA	NA	NA	HLA-B*39:05	0	0	0	0	0	0	0	0	1	0.047619
EpI_NSP12_711	HLA-I	NSP12	893	900	DELTGHML	8	No	NA	NA	NA	NA	NA	NA	HLA-B*18:01	1	0	0	1	0	0	0	0	0	0.114379
EpI_NSP12_712	HLA-I	NSP12	893	902	DELTGHMLDM	10	No	NA	NA	NA	NA	NA	NA	HLA-B*18:01	1	0	0	1	0	0	0	0	0	0.114379
EpI_NSP12_713	HLA-I	NSP12	893	903	DELTGHMLDMY	11	Yes	NA	NA	NA	LTGHMLDMY	39913	HLA-A*01:01, HLA-A*29:02, HLA-A*30:02	HLA-B*18:01	1	0	0	1	0	0	0	0	0	0.114379
EpI_NSP12_714	HLA-I	NSP12	895	903	LTGHMLDMY	9	Yes	NA	NA	NA	LTGHMLDMY	39913	HLA-A*01:01, HLA-A*29:02, HLA-A*30:02	HLA-A*01:01, HLA-A*29:02	1	0	1	2	1	0	0	0	0	0.279645
EpI_NSP12_715	HLA-I	NSP12	897	905	GHMLDMYSV	9	No	NA	NA	NA	NA	NA	NA	HLA-B*39:05, HLA-B*39:09	0	0	0	1	0	0	0	0	2	0.154062
EpI_NSP12_716	HLA-I	NSP12	897	906	GHMLDMYSVM	10	Yes	NA	NA	NA	HMLDMYSVM	24342	HLA-A*26:01	HLA-B*39:05, HLA-B*39:09	0	0	0	1	0	0	0	0	2	0.154062
EpI_NSP12_717	HLA-I	NSP12	898	905	HMLDMYSV	8	Yes	NA	NA	NA	HMLDMYSVM	24342	HLA-A*26:01	HLA-A*02:01, HLA-A*02:04, HLA-A*02:11, HLA-A*02:17, HLA-A*02:22	1	0	1	1	1	1	1	2	4	0.95852
EpI_NSP12_718	HLA-I	NSP12	898	906	HMLDMYSVM	9	Yes	NA	NA	NA	HMLDMYSVM	24342	HLA-A*26:01	HLA-A*02:01, HLA-A*02:04, HLA-A*02:11, HLA-A*02:17, HLA-A*02:22, HLA-B*08:01, HLA-B*15:01, HLA-B*15:04, HLA-B*35:01, HLA-B*35:05, HLA-B*35:11, HLA-B*35:12, HLA-B*35:43, HLA-B*39:05, HLA-B*39:09, HLA-C*01:02, HLA-C*03:04, HLA-C*15:03, HLA-C*16:01	3	0	5	3	5	1	4	4	12	2.59122
EpI_NSP12_719	HLA-I	NSP12	898	907	HMLDMYSVML	10	Yes	NA	NA	NA	HMLDMYSVM	24342	HLA-A*26:01	HLA-A*02:01, HLA-A*02:04, HLA-A*02:11, HLA-A*02:17, HLA-A*02:22	1	0	1	1	1	1	1	2	4	0.95852
EpI_NSP12_720	HLA-I	NSP12	899	907	MLDMYSVML	9	No	NA	NA	NA	NA	NA	NA	HLA-A*02:01, HLA-A*02:04, HLA-A*02:11, HLA-A*02:17, HLA-A*02:22, HLA-B*35:12, HLA-B*39:05, HLA-B*39:09, HLA-C*01:02, HLA-C*03:04, HLA-C*04:01, HLA-C*05:01, HLA-C*15:02, HLA-C*15:03, HLA-C*16:01	3	0	6	4	6	1	1	4	11	2.33387
EpI_NSP12_721	HLA-I	NSP12	899	906	MLDMYSVM	8	Yes	NA	NA	NA	HMLDMYSVM	24342	HLA-A*26:01	HLA-C*01:02, HLA-C*04:01	1	0	1	1	2	0	0	1	2	0.485994
EpI_NSP12_722	HLA-I	NSP12	904	914	SVMLTNDNTSR	11	No	NA	NA	NA	NA	NA	NA	HLA-A*11:01, HLA-A*31:01, HLA-A*68:01	2	0	1	2	1	1	1	1	1	0.818931
EpI_NSP12_723	HLA-I	NSP12	905	915	VMLTNDNTSRY	11	Yes	NA	NA	NA	LTNDNTSRY	40050	HLA-A*01:01, HLA-A*26:01, HLA-A*29:02, HLA-A*30:02	HLA-A*29:02, HLA-B*15:01, HLA-B*15:04	0	0	0	1	0	0	1	0	1	0.231443
EpI_NSP12_724	HLA-I	NSP12	905	914	VMLTNDNTSR	10	No	NA	NA	NA	NA	NA	NA	HLA-A*31:01	1	0	0	1	0	0	1	1	1	0.398109
EpI_NSP12_725	HLA-I	NSP12	906	915	MLTNDNTSRY	10	Yes	NA	NA	NA	LTNDNTSRY	40050	HLA-A*01:01, HLA-A*26:01, HLA-A*29:02, HLA-A*30:02	HLA-A*29:02, HLA-B*15:01, HLA-B*15:04, HLA-B*35:05, HLA-B*35:11, HLA-B*35:43	0	0	0	1	1	0	3	0	2	0.587885
EpI_NSP12_726	HLA-I	NSP12	906	914	MLTNDNTSR	9	No	NA	NA	NA	NA	NA	NA	HLA-A*31:01, HLA-A*68:01	1	0	0	2	1	1	1	1	1	0.715756
EpI_NSP12_727	HLA-I	NSP12	907	915	LTNDNTSRY	9	Yes	NA	NA	NA	LTNDNTSRY	40050	HLA-A*01:01, HLA-A*26:01, HLA-A*29:02, HLA-A*30:02	HLA-A*01:01, HLA-A*11:01, HLA-A*29:02, HLA-A*68:01, HLA-B*15:01, HLA-B*15:04, HLA-B*35:01, HLA-B*35:05, HLA-B*35:11, HLA-B*35:43, HLA-C*07:01, HLA-C*15:03, HLA-C*16:01	4	0	5	5	5	1	3	1	3	1.87752
EpI_NSP12_728	HLA-I	NSP12	908	915	TNDNTSRY	8	Yes	NA	NA	NA	LTNDNTSRY	40050	HLA-A*01:01, HLA-A*26:01, HLA-A*29:02, HLA-A*30:02	HLA-A*01:01	1	0	1	1	1	0	0	0	0	0.220822
EpI_NSP12_729	HLA-I	NSP12	911	921	NTSRYWEPEFY	11	Yes	NA	NA	NA	SRYWEPEFY, TSRYWEPEFY	60868, 66411	HLA-B*27:05	HLA-A*01:01	1	0	1	1	1	0	0	0	0	0.220822
EpI_NSP12_730	HLA-I	NSP12	912	921	TSRYWEPEFY	10	Yes	NA	NA	NA	SRYWEPEFY, TSRYWEPEFY	60868, 66411	HLA-B*27:05, HLA-A*01:01, HLA-A*29:02, HLA-A*30:02	HLA-A*01:01, HLA-A*29:02, HLA-C*07:01	2	0	2	3	2	0	0	0	0	0.500467
EpI_NSP12_731	HLA-I	NSP12	912	920	TSRYWEPEF	9	Yes	NA	NA	NA	TSRYWEPEFY	66411	HLA-A*01:01, HLA-A*29:02, HLA-A*30:02	HLA-B*35:05, HLA-B*35:11, HLA-B*35:43, HLA-C*16:01	0	0	1	0	2	0	2	0	1	0.462885
EpI_NSP12_732	HLA-I	NSP12	913	921	SRYWEPEFY	9	Yes	NA	NA	NA	SRYWEPEFY, TSRYWEPEFY	60868, 66411	HLA-B*27:05, HLA-A*01:01, HLA-A*29:02, HLA-A*30:02	HLA-B*15:04, HLA-B*39:05, HLA-B*39:09, HLA-C*07:01	1	0	1	2	1	0	1	0	2	0.499883
EpI_NSP12_733	HLA-I	NSP12	913	920	SRYWEPEF	8	Yes	NA	NA	NA	SRYWEPEFY, TSRYWEPEFY	60868, 66411	HLA-B*27:05, HLA-A*01:01, HLA-A*29:02, HLA-A*30:02	HLA-B*39:05, HLA-B*39:09, HLA-C*07:01	1	0	1	2	1	0	0	0	2	0.374883
EpI_NSP12_734	HLA-I	NSP12	914	924	RYWEPEFYEAM	11	No	NA	NA	NA	NA	NA	NA	HLA-A*24:02	1	0	1	1	1	1	0	1	1	0.579552
EpI_NSP12_735	HLA-I	NSP12	914	921	RYWEPEFY	8	Yes	NA	NA	NA	SRYWEPEFY, TSRYWEPEFY	60868, 66411	HLA-B*27:05, HLA-A*01:01, HLA-A*29:02, HLA-A*30:02	HLA-A*29:02	0	0	0	1	0	0	0	0	0	0.0588235
EpI_NSP12_736	HLA-I	NSP12	914	922	RYWEPEFYE	9	No	NA	NA	NA	NA	NA	NA	HLA-A*31:01	1	0	0	1	0	0	1	1	1	0.398109
EpI_NSP12_737	HLA-I	NSP12	915	925	YWEPEFYEAMY	11	Yes	NA	NA	NA	EPEFYEAMY, WEPEFYEAMY	13633, 72364	HLA-A*29:02, HLA-A*30:02	HLA-A*29:02	0	0	0	1	0	0	0	0	0	0.0588235
EpI_NSP12_738	HLA-I	NSP12	916	924	WEPEFYEAM	9	Yes	NA	NA	NA	WEPEFYEAMY	72364	HLA-B*18:01, HLA-B*44:02, HLA-B*44:03	HLA-B*18:01, HLA-B*39:05, HLA-B*39:09, HLA-B*40:02	1	0	0	2	1	1	0	0	3	0.574883
EpI_NSP12_739	HLA-I	NSP12	916	925	WEPEFYEAMY	10	Yes	NA	NA	NA	EPEFYEAMY, WEPEFYEAMY	13633, 72364	HLA-A*29:02, HLA-A*30:02, HLA-B*18:01, HLA-B*44:02, HLA-B*44:03	HLA-B*18:01	1	0	0	1	0	0	0	0	0	0.114379
EpI_NSP12_740	HLA-I	NSP12	917	925	EPEFYEAMY	9	Yes	NA	NA	NA	EPEFYEAMY, WEPEFYEAMY	13633, 72364	HLA-A*29:02, HLA-A*30:02, HLA-B*18:01, HLA-B*44:02, HLA-B*44:03	HLA-B*35:01, HLA-B*35:05, HLA-B*35:11, HLA-B*35:12, HLA-B*35:43	1	0	1	1	1	0	2	1	2	0.677171
EpI_NSP12_741	HLA-I	NSP12	917	924	EPEFYEAM	8	Yes	NA	NA	NA	EPEFYEAMY, WEPEFYEAMY	13633, 72364	HLA-A*29:02, HLA-A*30:02, HLA-B*18:01, HLA-B*44:02, HLA-B*44:03	HLA-B*35:12	0	0	0	0	0	0	0	0	1	0.047619
EpI_NSP12_742	HLA-I	NSP12	918	925	PEFYEAMY	8	Yes	NA	NA	NA	EPEFYEAMY, PEFYEAMYT, WEPEFYEAMY	13633, 47281, 72364	HLA-A*29:02, HLA-A*30:02, HLA-B*40:01, HLA-B*45:01, HLA-B*18:01, HLA-B*44:02, HLA-B*44:03	HLA-B*18:01	1	0	0	1	0	0	0	0	0	0.114379
EpI_NSP12_743	HLA-I	NSP12	921	930	YEAMYTPHTV	10	Yes	NA	NA	NA	YEAMYTPHT	73620	HLA-B*18:01, HLA-B*40:02, HLA-B*45:01	HLA-B*39:05, HLA-B*40:02, HLA-C*03:04, HLA-C*15:03	0	0	1	0	2	1	0	1	4	0.666853
EpI_NSP12_744	HLA-I	NSP12	921	931	YEAMYTPHTVL	11	Yes	NA	NA	NA	YEAMYTPHT	73620	HLA-B*18:01, HLA-B*40:02, HLA-B*45:01	HLA-B*39:05, HLA-B*39:09, HLA-B*40:02	0	0	0	1	1	1	0	0	3	0.460504
EpI_NSP12_745	HLA-I	NSP12	922	930	EAMYTPHTV	9	No	NA	NA	NA	NA	NA	NA	HLA-A*68:02, HLA-B*35:05, HLA-B*35:11, HLA-B*35:12, HLA-B*35:43, HLA-B*39:05, HLA-B*39:09, HLA-C*01:02, HLA-C*03:04, HLA-C*06:02, HLA-C*07:01, HLA-C*15:03, HLA-C*16:01	2	0	4	3	6	0	2	1	8	1.57306
EpI_NSP12_746	HLA-I	NSP12	922	931	EAMYTPHTVL	10	No	NA	NA	NA	NA	NA	NA	HLA-A*68:02, HLA-B*35:12, HLA-C*03:04	0	0	1	0	1	0	0	1	3	0.360411
EpI_NSP12_747	HLA-I	NSP12	923	930	AMYTPHTV	8	No	NA	NA	NA	NA	NA	NA	HLA-A*02:01, HLA-A*02:04, HLA-A*02:11, HLA-B*15:04	1	0	1	1	1	1	2	2	2	0.988282
EpI_NSP12_748	HLA-I	NSP12	923	931	AMYTPHTVL	9	No	NA	NA	NA	NA	NA	NA	HLA-A*02:04, HLA-A*02:11, HLA-A*02:22, HLA-B*15:01, HLA-B*15:04, HLA-B*35:12, HLA-B*39:05, HLA-B*39:09, HLA-C*01:02, HLA-C*03:04, HLA-C*04:01, HLA-C*07:01, HLA-C*15:03, HLA-C*16:01	2	0	4	3	5	0	2	3	10	1.8317
EpI_NSP12_749	HLA-I	NSP12	923	932	AMYTPHTVLQ	10	No	NA	NA	NA	NA	NA	NA	HLA-A*03:01	1	0	1	1	1	1	0	0	0	0.420822
EpI_NSP12_750	HLA-I	NSP12	924	931	MYTPHTVL	8	No	NA	NA	NA	NA	NA	NA	HLA-A*24:02	1	0	1	1	1	1	0	1	1	0.579552
EpI_NSP13_1	HLA-I	NSP13	6	14	VLCNSQTSL	9	Yes	NA	NA	NA	VLCNSQTSLR	69402	HLA-A*03:01, HLA-A*11:01, HLA-A*31:01, HLA-A*33:01, HLA-A*68:01	HLA-A*02:04, HLA-A*02:22, HLA-B*15:04	0	0	0	0	0	0	1	0	2	0.220238
EpI_NSP13_2	HLA-I	NSP13	6	15	VLCNSQTSLR	10	Yes	NA	NA	NA	VLCNSQTSLR	69402	HLA-A*03:01, HLA-A*11:01, HLA-A*31:01, HLA-A*33:01, HLA-A*68:01	HLA-A*03:01, HLA-A*31:01	2	0	1	2	1	1	1	1	1	0.818931
EpI_NSP13_3	HLA-I	NSP13	13	21	SLRCGACIR	9	Yes	NA	NA	NA	SLRCGACIRR	59428	HLA-A*03:01, HLA-A*11:01, HLA-A*31:01, HLA-A*33:01, HLA-A*68:01	HLA-A*31:01	1	0	0	1	0	0	1	1	1	0.398109
EpI_NSP13_4	HLA-I	NSP13	13	22	SLRCGACIRR	10	Yes	NA	NA	NA	SLRCGACIRR	59428	HLA-A*03:01, HLA-A*11:01, HLA-A*31:01, HLA-A*33:01, HLA-A*68:01	HLA-A*31:01	1	0	0	1	0	0	1	1	1	0.398109
EpI_NSP13_5	HLA-I	NSP13	32	41	DHVISTSHKL	10	No	NA	NA	NA	NA	NA	NA	HLA-B*39:05, HLA-B*39:09	0	0	0	1	0	0	0	0	2	0.154062
EpI_NSP13_6	HLA-I	NSP13	33	41	HVISTSHKL	9	No	NA	NA	NA	NA	NA	NA	HLA-A*02:22, HLA-A*68:02, HLA-B*15:04, HLA-B*35:05, HLA-B*35:11, HLA-B*35:12, HLA-B*35:43, HLA-B*39:05, HLA-B*39:09, HLA-C*01:02, HLA-C*03:04, HLA-C*07:01, HLA-C*15:03, HLA-C*16:01	1	0	3	2	5	0	3	1	9	1.52486
EpI_NSP13_7	HLA-I	NSP13	33	40	HVISTSHK	8	No	NA	NA	NA	NA	NA	NA	HLA-A*68:01	0	0	0	1	1	1	0	0	0	0.317647
EpI_NSP13_8	HLA-I	NSP13	33	42	HVISTSHKLV	10	No	NA	NA	NA	NA	NA	NA	HLA-A*68:02	0	0	0	0	0	0	0	0	1	0.047619
EpI_NSP13_9	HLA-I	NSP13	35	43	ISTSHKLVL	9	No	NA	NA	NA	NA	NA	NA	HLA-C*01:02, HLA-C*03:04, HLA-C*15:02, HLA-C*15:03, HLA-C*16:01	0	0	3	0	3	0	0	1	3	0.573296
EpI_NSP13_10	HLA-I	NSP13	36	45	STSHKLVLSV	10	No	NA	NA	NA	NA	NA	NA	HLA-A*68:02	0	0	0	0	0	0	0	0	1	0.047619
EpI_NSP13_11	HLA-I	NSP13	37	45	TSHKLVLSV	9	No	NA	NA	NA	NA	NA	NA	HLA-A*68:02, HLA-C*01:02, HLA-C*03:04, HLA-C*15:03, HLA-C*16:01	0	0	2	0	3	0	0	1	4	0.573296
EpI_NSP13_12	HLA-I	NSP13	40	49	KLVLSVNPYV	10	Yes	NA	NA	NA	LVLSVNPYV	40459	HLA-A*02:01, HLA-A*02:02, HLA-A*02:03, HLA-A*02:06	HLA-A*02:01, HLA-A*02:04, HLA-A*02:11, HLA-A*02:17, HLA-A*02:22	1	0	1	1	1	1	1	2	4	0.95852
EpI_NSP13_13	HLA-I	NSP13	40	48	KLVLSVNPY	9	No	NA	NA	NA	NA	NA	NA	HLA-B*15:01, HLA-B*15:04	0	0	0	0	0	0	1	0	1	0.172619
EpI_NSP13_14	HLA-I	NSP13	41	49	LVLSVNPYV	9	Yes	NA	NA	NA	LVLSVNPYV	40459	HLA-A*02:01, HLA-A*02:02, HLA-A*02:03, HLA-A*02:06	HLA-A*02:01, HLA-A*02:04, HLA-A*02:11, HLA-A*02:17, HLA-A*02:22, HLA-A*68:02, HLA-C*03:04, HLA-C*15:03	1	0	2	1	2	1	1	3	7	1.31893
EpI_NSP13_15	HLA-I	NSP13	42	49	VLSVNPYV	8	Yes	NA	NA	NA	LVLSVNPYV	40459	HLA-A*02:01, HLA-A*02:02, HLA-A*02:03, HLA-A*02:06	HLA-A*02:01, HLA-A*02:04, HLA-A*02:11, HLA-A*02:22	1	0	1	1	1	1	1	2	3	0.910901
EpI_NSP13_16	HLA-I	NSP13	44	52	SVNPYVCNA	9	No	NA	NA	NA	NA	NA	NA	HLA-A*02:04, HLA-A*02:22, HLA-A*68:02, HLA-C*15:03	0	0	0	0	0	0	0	0	4	0.190476
EpI_NSP13_17	HLA-I	NSP13	54	64	GCDVTDVTQLY	11	No	NA	NA	NA	NA	NA	NA	HLA-A*01:01	1	0	1	1	1	0	0	0	0	0.220822
EpI_NSP13_18	HLA-I	NSP13	56	64	DVTDVTQLY	9	No	NA	NA	NA	NA	NA	NA	HLA-A*29:02, HLA-A*68:01, HLA-B*35:01, HLA-B*35:05, HLA-B*35:11, HLA-B*35:12, HLA-B*35:43	1	0	1	3	2	1	2	1	2	1.05364
EpI_NSP13_19	HLA-I	NSP13	56	65	DVTDVTQLYL	10	No	NA	NA	NA	NA	NA	NA	HLA-A*68:02	0	0	0	0	0	0	0	0	1	0.047619
EpI_NSP13_20	HLA-I	NSP13	57	64	VTDVTQLY	8	No	NA	NA	NA	NA	NA	NA	HLA-A*01:01	1	0	1	1	1	0	0	0	0	0.220822
EpI_NSP13_21	HLA-I	NSP13	57	65	VTDVTQLYL	9	No	NA	NA	NA	NA	NA	NA	HLA-A*01:01, HLA-A*02:04, HLA-B*35:12, HLA-C*01:02, HLA-C*03:04, HLA-C*04:01, HLA-C*05:01, HLA-C*07:01, HLA-C*15:02, HLA-C*15:03, HLA-C*16:01	4	0	7	4	7	0	0	2	6	1.71055
EpI_NSP13_22	HLA-I	NSP13	60	70	VTQLYLGGMSY	11	Yes	NA	NA	NA	TQLYLGGMSY	65895	HLA-A*03:01, HLA-A*11:01, HLA-A*68:01	HLA-A*01:01, HLA-A*11:01, HLA-B*15:01, HLA-B*15:04	2	0	2	1	1	0	1	0	1	0.496615
EpI_NSP13_23	HLA-I	NSP13	61	70	TQLYLGGMSY	10	Yes	NA	NA	NA	TQLYLGGMSY	65895	HLA-A*03:01, HLA-A*11:01, HLA-A*68:01	HLA-A*29:02, HLA-B*15:01, HLA-B*15:04, HLA-B*35:05, HLA-B*35:11, HLA-B*35:43, HLA-B*44:03	1	0	1	1	2	0	3	0	2	0.749883
EpI_NSP13_24	HLA-I	NSP13	61	71	TQLYLGGMSYY	11	Yes	NA	NA	NA	QLYLGGMSYY, TQLYLGGMSY	51585, 65895	HLA-A*03:01, HLA-A*11:01, HLA-A*68:01	HLA-B*15:01	0	0	0	0	0	0	0	0	1	0.047619
EpI_NSP13_25	HLA-I	NSP13	62	70	QLYLGGMSY	9	Yes	NA	NA	NA	QLYLGGMSYY, TQLYLGGMSY	51585, 65895	HLA-A*03:01, HLA-A*11:01, HLA-A*68:01	HLA-A*03:01, HLA-A*29:02, HLA-B*15:01, HLA-B*15:04, HLA-B*35:05, HLA-B*35:11, HLA-B*35:43, HLA-C*07:01, HLA-C*16:01	2	0	3	3	4	1	3	0	2	1.33597
EpI_NSP13_26	HLA-I	NSP13	62	71	QLYLGGMSYY	10	Yes	NA	NA	NA	QLYLGGMSYY	51585	HLA-A*03:01, HLA-A*11:01, HLA-A*68:01	HLA-A*03:01, HLA-A*11:01, HLA-A*29:02, HLA-A*68:01, HLA-B*15:01, HLA-B*15:04, HLA-B*35:11, HLA-B*35:43	2	0	2	3	3	2	2	0	2	1.30453
EpI_NSP13_27	HLA-I	NSP13	63	70	LYLGGMSY	8	Yes	NA	NA	NA	QLYLGGMSYY, TQLYLGGMSY	51585, 65895	HLA-A*03:01, HLA-A*11:01, HLA-A*68:01	HLA-A*29:02, HLA-B*15:04	0	0	0	1	0	0	1	0	0	0.183824
EpI_NSP13_28	HLA-I	NSP13	63	71	LYLGGMSYY	9	Yes	NA	NA	NA	QLYLGGMSYY	51585	HLA-A*03:01, HLA-A*11:01, HLA-A*68:01	HLA-A*29:02, HLA-C*07:01	1	0	1	2	1	0	0	0	0	0.279645
EpI_NSP13_29	HLA-I	NSP13	64	72	YLGGMSYYC	9	No	NA	NA	NA	NA	NA	NA	HLA-A*02:01, HLA-A*02:04, HLA-A*02:11, HLA-A*02:22	1	0	1	1	1	1	1	2	3	0.910901
EpI_NSP13_30	HLA-I	NSP13	64	73	YLGGMSYYCK	10	No	NA	NA	NA	NA	NA	NA	HLA-A*03:01, HLA-A*11:01	2	0	2	1	1	1	0	0	0	0.523996
EpI_NSP13_31	HLA-I	NSP13	64	71	YLGGMSYY	8	Yes	NA	NA	NA	QLYLGGMSYY	51585	HLA-A*03:01, HLA-A*11:01, HLA-A*68:01	HLA-A*29:02, HLA-B*15:01	0	0	0	1	0	0	0	0	1	0.106443
EpI_NSP13_32	HLA-I	NSP13	67	76	GMSYYCKSHK	10	Yes	NA	NA	NA	GMSYYCKSHK, MSYYCKSHK	21351, 42732	HLA-A*03:01, HLA-A*11:01, HLA-A*31:01, HLA-A*33:01, HLA-A*68:01	HLA-A*03:01	1	0	1	1	1	1	0	0	0	0.420822
EpI_NSP13_33	HLA-I	NSP13	68	76	MSYYCKSHK	9	Yes	NA	NA	NA	GMSYYCKSHK, MSYYCKSHK	21351, 42732	HLA-A*03:01, HLA-A*11:01, HLA-A*31:01, HLA-A*33:01, HLA-A*68:01	HLA-A*03:01, HLA-A*11:01, HLA-A*31:01, HLA-A*68:01	3	0	2	3	2	2	1	1	1	1.23975
EpI_NSP13_34	HLA-I	NSP13	71	79	YCKSHKPPI	9	Yes	NA	NA	NA	YYCKSHKPPI	76489	HLA-A*23:01, HLA-A*24:02, HLA-A*29:02	HLA-B*08:01	1	0	1	0	0	0	0	0	0	0.103175
EpI_NSP13_35	HLA-I	NSP13	73	81	KSHKPPISF	9	No	NA	NA	NA	NA	NA	NA	HLA-B*15:01, HLA-B*15:04, HLA-B*35:05, HLA-B*35:11, HLA-B*35:43, HLA-C*01:02, HLA-C*03:04, HLA-C*04:01, HLA-C*07:01, HLA-C*15:03, HLA-C*16:01	2	0	4	2	6	0	3	2	6	1.65511
EpI_NSP13_36	HLA-I	NSP13	74	81	SHKPPISF	8	No	NA	NA	NA	NA	NA	NA	HLA-B*39:05, HLA-B*39:09	0	0	0	1	0	0	0	0	2	0.154062
EpI_NSP13_37	HLA-I	NSP13	74	83	SHKPPISFPL	10	No	NA	NA	NA	NA	NA	NA	HLA-B*39:05, HLA-B*39:09	0	0	0	1	0	0	0	0	2	0.154062
EpI_NSP13_38	HLA-I	NSP13	75	83	HKPPISFPL	9	No	NA	NA	NA	NA	NA	NA	HLA-B*39:05, HLA-B*39:09, HLA-C*07:01	1	0	1	2	1	0	0	0	2	0.374883
EpI_NSP13_39	HLA-I	NSP13	76	83	KPPISFPL	8	Yes	NA	NA	NA	KPPISFPLCA	32820	HLA-B*54:01	HLA-B*07:02	1	0	1	1	0	0	0	0	0	0.161998
EpI_NSP13_40	HLA-I	NSP13	80	90	SFPLCANGQVF	11	Yes	NA	NA	NA	FPLCANGQVF	17325	HLA-B*07:02, HLA-B*35:01, HLA-B*51:01, HLA-B*53:01, HLA-B*54:01	HLA-A*24:02	1	0	1	1	1	1	0	1	1	0.579552
EpI_NSP13_41	HLA-I	NSP13	81	89	FPLCANGQV	9	Yes	NA	NA	NA	FPLCANGQVF	17325	HLA-B*07:02, HLA-B*35:01, HLA-B*51:01, HLA-B*53:01, HLA-B*54:01	HLA-B*07:02, HLA-B*35:01, HLA-B*35:12	2	0	2	2	0	0	0	1	1	0.482726
EpI_NSP13_42	HLA-I	NSP13	81	90	FPLCANGQVF	10	Yes	NA	NA	NA	FPLCANGQVF	17325	HLA-B*07:02, HLA-B*35:01, HLA-B*51:01, HLA-B*53:01, HLA-B*54:01	HLA-B*07:02, HLA-B*35:01, HLA-B*35:05, HLA-B*35:11, HLA-B*35:12, HLA-B*35:43	2	0	2	2	1	0	2	1	2	0.839169
EpI_NSP13_43	HLA-I	NSP13	84	92	CANGQVFGL	9	No	NA	NA	NA	NA	NA	NA	HLA-C*15:03	0	0	0	0	0	0	0	0	1	0.047619
EpI_NSP13_44	HLA-I	NSP13	85	94	ANGQVFGLYK	10	No	NA	NA	NA	NA	NA	NA	HLA-A*11:01	1	0	1	0	0	0	0	0	0	0.103175
EpI_NSP13_45	HLA-I	NSP13	85	93	ANGQVFGLY	9	No	NA	NA	NA	NA	NA	NA	HLA-A*29:02	0	0	0	1	0	0	0	0	0	0.0588235
EpI_NSP13_46	HLA-I	NSP13	86	94	NGQVFGLYK	9	No	NA	NA	NA	NA	NA	NA	HLA-A*11:01	1	0	1	0	0	0	0	0	0	0.103175
EpI_NSP13_47	HLA-I	NSP13	95	103	NTCVGSDNV	9	No	NA	NA	NA	NA	NA	NA	HLA-A*68:02	0	0	0	0	0	0	0	0	1	0.047619
EpI_NSP13_48	HLA-I	NSP13	98	106	VGSDNVTDF	9	No	NA	NA	NA	NA	NA	NA	HLA-B*35:05, HLA-B*35:11, HLA-B*35:43, HLA-C*16:01	0	0	1	0	2	0	2	0	1	0.462885
EpI_NSP13_49	HLA-I	NSP13	102	110	NVTDFNAIA	9	No	NA	NA	NA	NA	NA	NA	HLA-A*68:02	0	0	0	0	0	0	0	0	1	0.047619
EpI_NSP13_50	HLA-I	NSP13	103	110	VTDFNAIA	8	No	NA	NA	NA	NA	NA	NA	HLA-A*01:01	1	0	1	1	1	0	0	0	0	0.220822
EpI_NSP13_51	HLA-I	NSP13	110	120	ATCDWTNAGDY	11	Yes	NA	NA	NA	TCDWTNAGDY	63059	HLA-A*01:01, HLA-A*29:02, HLA-A*30:02	HLA-A*01:01	1	0	1	1	1	0	0	0	0	0.220822
EpI_NSP13_52	HLA-I	NSP13	111	120	TCDWTNAGDY	10	Yes	NA	NA	NA	TCDWTNAGDY	63059	HLA-A*01:01, HLA-A*29:02, HLA-A*30:02	HLA-A*01:01	1	0	1	1	1	0	0	0	0	0.220822
EpI_NSP13_53	HLA-I	NSP13	114	122	WTNAGDYIL	9	No	NA	NA	NA	NA	NA	NA	HLA-A*68:02, HLA-B*35:01, HLA-B*35:05, HLA-B*35:12, HLA-B*35:43, HLA-B*39:05, HLA-B*39:09, HLA-C*01:02, HLA-C*03:04, HLA-C*05:01, HLA-C*15:02, HLA-C*15:03, HLA-C*16:01	2	0	5	3	5	0	1	2	8	1.54797
EpI_NSP13_54	HLA-I	NSP13	120	129	YILANTCTER	10	No	NA	NA	NA	NA	NA	NA	HLA-A*68:01	0	0	0	1	1	1	0	0	0	0.317647
EpI_NSP13_55	HLA-I	NSP13	121	130	ILANTCTERL	10	No	NA	NA	NA	NA	NA	NA	HLA-A*02:01, HLA-A*02:11, HLA-A*02:22	1	0	1	1	1	1	1	2	2	0.863282
EpI_NSP13_56	HLA-I	NSP13	121	129	ILANTCTER	9	No	NA	NA	NA	NA	NA	NA	HLA-A*31:01, HLA-A*68:01	1	0	0	2	1	1	1	1	1	0.715756
EpI_NSP13_57	HLA-I	NSP13	122	130	LANTCTERL	9	No	NA	NA	NA	NA	NA	NA	HLA-C*03:04	0	0	1	0	1	0	0	1	1	0.265173
EpI_NSP13_58	HLA-I	NSP13	129	139	RLKLFAAETLK	11	Yes	NA	NA	NA	KLFAAETLK	31833	HLA-A*03:01, HLA-A*11:01, HLA-A*31:01, HLA-A*68:01, HLA-B*27:05	HLA-A*03:01	1	0	1	1	1	1	0	0	0	0.420822
EpI_NSP13_59	HLA-I	NSP13	130	138	LKLFAAETL	9	No	NA	NA	NA	NA	NA	NA	HLA-B*39:05, HLA-B*39:09	0	0	0	1	0	0	0	0	2	0.154062
EpI_NSP13_60	HLA-I	NSP13	131	138	KLFAAETL	8	Yes	NA	NA	NA	KLFAAETLK	31833	HLA-A*03:01, HLA-A*11:01, HLA-A*31:01, HLA-A*68:01, HLA-B*27:05	HLA-A*02:01, HLA-A*02:04	1	0	1	1	1	1	0	1	2	0.627171
EpI_NSP13_61	HLA-I	NSP13	131	140	KLFAAETLKA	10	Yes	NA	NA	NA	KLFAAETLK	31833	HLA-A*03:01, HLA-A*11:01, HLA-A*31:01, HLA-A*68:01, HLA-B*27:05	HLA-A*02:01, HLA-A*02:04, HLA-A*02:11, HLA-A*02:22	1	0	1	1	1	1	1	2	3	0.910901
EpI_NSP13_62	HLA-I	NSP13	131	139	KLFAAETLK	9	Yes	NA	NA	NA	KLFAAETLK	31833	HLA-A*03:01, HLA-A*11:01, HLA-A*31:01, HLA-A*68:01, HLA-B*27:05	HLA-A*03:01, HLA-A*11:01, HLA-A*31:01, HLA-A*68:01	3	0	2	3	2	2	1	1	1	1.23975
EpI_NSP13_63	HLA-I	NSP13	133	141	FAAETLKAT	9	No	NA	NA	NA	NA	NA	NA	HLA-C*03:04	0	0	1	0	1	0	0	1	1	0.265173
EpI_NSP13_64	HLA-I	NSP13	136	146	ETLKATEETFK	11	No	NA	NA	NA	NA	NA	NA	HLA-A*68:01	0	0	0	1	1	1	0	0	0	0.317647
EpI_NSP13_65	HLA-I	NSP13	136	144	ETLKATEET	9	No	NA	NA	NA	NA	NA	NA	HLA-A*68:02	0	0	0	0	0	0	0	0	1	0.047619
EpI_NSP13_66	HLA-I	NSP13	137	146	TLKATEETFK	10	No	NA	NA	NA	NA	NA	NA	HLA-A*03:01, HLA-A*11:01	2	0	2	1	1	1	0	0	0	0.523996
EpI_NSP13_67	HLA-I	NSP13	137	145	TLKATEETF	9	No	NA	NA	NA	NA	NA	NA	HLA-B*15:01, HLA-B*15:04, HLA-B*35:05, HLA-B*35:11, HLA-B*35:43	0	0	0	0	1	0	3	0	2	0.529062
EpI_NSP13_68	HLA-I	NSP13	139	147	KATEETFKL	9	No	NA	NA	NA	NA	NA	NA	HLA-B*35:05, HLA-B*35:12, HLA-C*01:02, HLA-C*03:04, HLA-C*05:01, HLA-C*15:02, HLA-C*15:03, HLA-C*16:01	1	0	4	1	4	0	1	1	4	0.966737
EpI_NSP13_69	HLA-I	NSP13	140	149	ATEETFKLSY	10	Yes	NA	NA	NA	ATEETFKLSY, TEETFKLSY	4934, 63358	HLA-A*01:01, HLA-A*29:02, HLA-A*30:02	HLA-A*01:01, HLA-A*11:01, HLA-A*29:02	2	0	2	2	1	0	0	0	0	0.38282
EpI_NSP13_70	HLA-I	NSP13	141	149	TEETFKLSY	9	Yes	NA	NA	NA	ATEETFKLSY, TEETFKLSY	4934, 63358	HLA-A*01:01, HLA-A*29:02, HLA-A*30:02	HLA-B*18:01, HLA-B*44:03	2	0	1	1	1	0	0	0	0	0.276377
EpI_NSP13_71	HLA-I	NSP13	142	151	EETFKLSYGI	10	Yes	NA	NA	NA	EETFKLSYGI	11888	HLA-B*40:01, HLA-B*40:02, HLA-B*44:02, HLA-B*44:03, HLA-B*45:01	HLA-A*68:02	0	0	0	0	0	0	0	0	1	0.047619
EpI_NSP13_72	HLA-I	NSP13	142	149	EETFKLSY	8	Yes	NA	NA	NA	ATEETFKLSY, EETFKLSYGI, TEETFKLSY	4934, 11888, 63358	HLA-A*01:01, HLA-A*29:02, HLA-A*30:02, HLA-B*40:01, HLA-B*40:02, HLA-B*44:02, HLA-B*44:03, HLA-B*45:01	HLA-B*18:01, HLA-B*44:03	2	0	1	1	1	0	0	0	0	0.276377
EpI_NSP13_73	HLA-I	NSP13	143	151	ETFKLSYGI	9	Yes	NA	NA	NA	EETFKLSYGI	11888	HLA-B*40:01, HLA-B*40:02, HLA-B*44:02, HLA-B*44:03, HLA-B*45:01	HLA-A*68:02, HLA-C*15:03	0	0	0	0	0	0	0	0	2	0.0952381
EpI_NSP13_74	HLA-I	NSP13	143	152	ETFKLSYGIA	10	No	NA	NA	NA	NA	NA	NA	HLA-A*68:02	0	0	0	0	0	0	0	0	1	0.047619
EpI_NSP13_75	HLA-I	NSP13	144	154	TFKLSYGIATV	11	Yes	NA	NA	NA	KLSYGIATV	32183	HLA-A*02:01, HLA-A*02:02, HLA-A*02:03, HLA-A*02:06, HLA-A*68:02	HLA-A*02:22	0	0	0	0	0	0	0	0	1	0.047619
EpI_NSP13_76	HLA-I	NSP13	145	154	FKLSYGIATV	10	Yes	NA	NA	NA	KLSYGIATV	32183	HLA-A*02:01, HLA-A*02:02, HLA-A*02:03, HLA-A*02:06, HLA-A*68:02, HLA-B*40:01, HLA-B40:02, HLA-A*44:02, HLA-B*44:03, HLA-A*45:01	HLA-A*02:01, HLA-A*02:04, HLA-A*02:22	1	0	1	1	1	1	0	1	3	0.67479
EpI_NSP13_77	HLA-I	NSP13	145	155	FKLSYGIATVR	11	Yes	NA	NA	NA	KLSYGIATV, KLSYGIATVR	32183, 32184	HLA-A*02:01, HLA-A*02:02, HLA-A*02:03, HLA-A*02:06, HLA-A*68:02, HLA-B*40:01, HLA-B40:02, HLA-A*44:02, HLA-B*44:03, HLA-A*45:01	HLA-A*68:01	0	0	0	1	1	1	0	0	0	0.317647
EpI_NSP13_78	HLA-I	NSP13	146	154	KLSYGIATV	9	Yes	NA	NA	NA	KLSYGIATV, KLSYGIATVR	32183, 32184	HLA-A*02:01, HLA-A*02:02, HLA-A*02:03, HLA-A*02:06, HLA-A*68:02, HLA-B*40:01, HLA-B40:02, HLA-A*44:02, HLA-B*44:03, HLA-A*45:01	HLA-A*02:01, HLA-A*02:04, HLA-A*02:11, HLA-A*02:17, HLA-A*02:22, HLA-B*15:04, HLA-C*01:02, HLA-C*15:03, HLA-C*16:01	1	0	2	1	3	1	2	2	6	1.34402
EpI_NSP13_79	HLA-I	NSP13	146	155	KLSYGIATVR	10	Yes	NA	NA	NA	KLSYGIATV, KLSYGIATVR	32183, 32184	HLA-A*02:01, HLA-A*02:02, HLA-A*02:03, HLA-A*02:06, HLA-A*68:02, HLA-B*40:01, HLA-B40:02, HLA-A*44:02, HLA-B*44:03, HLA-A*45:01	HLA-A*02:22, HLA-A*03:01, HLA-A*11:01, HLA-A*31:01, HLA-A*68:01	3	0	2	3	2	2	1	1	2	1.28737
EpI_NSP13_80	HLA-I	NSP13	147	155	LSYGIATVR	9	Yes	NA	NA	NA	KLSYGIATVR	32184	HLA-B*40:01, HLA-B40:02, HLA-A*44:02, HLA-B*44:03, HLA-A*45:01	HLA-A*11:01, HLA-A*31:01, HLA-A*68:01	2	0	1	2	1	1	1	1	1	0.818931
EpI_NSP13_81	HLA-I	NSP13	147	154	LSYGIATV	8	Yes	NA	NA	NA	KLSYGIATV, KLSYGIATVR	32183, 32184	HLA-A*02:01, HLA-A*02:02, HLA-A*02:03, HLA-A*02:06, HLA-A*68:02, HLA-B*40:01, HLA-B40:02, HLA-A*44:02, HLA-B*44:03, HLA-A*45:01	HLA-C*15:03	0	0	0	0	0	0	0	0	1	0.047619
EpI_NSP13_82	HLA-I	NSP13	149	157	YGIATVREV	9	No	NA	NA	NA	NA	NA	NA	HLA-C*01:02, HLA-C*03:04, HLA-C*06:02, HLA-C*07:01, HLA-C*15:03, HLA-C*16:01	2	0	4	2	5	0	0	1	3	0.96732
EpI_NSP13_83	HLA-I	NSP13	150	158	GIATVREVL	9	No	NA	NA	NA	NA	NA	NA	HLA-A*02:22, HLA-C*01:02, HLA-C*03:04, HLA-C*16:01	0	0	2	0	3	0	0	1	3	0.525677
EpI_NSP13_84	HLA-I	NSP13	152	161	ATVREVLSDR	10	No	NA	NA	NA	NA	NA	NA	HLA-A*11:01, HLA-A*31:01, HLA-A*68:01	2	0	1	2	1	1	1	1	1	0.818931
EpI_NSP13_85	HLA-I	NSP13	153	161	TVREVLSDR	9	No	NA	NA	NA	NA	NA	NA	HLA-A*31:01, HLA-A*68:01	1	0	0	2	1	1	1	1	1	0.715756
EpI_NSP13_86	HLA-I	NSP13	155	163	REVLSDREL	9	Yes	NA	NA	NA	REVLSDREL	53663	HLA-B*40:01, HLA-B40:02, HLA-A*44:02, HLA-B*44:03, HLA-A*45:01	HLA-B*39:05, HLA-B*40:02	0	0	0	0	1	1	0	0	2	0.354062
EpI_NSP13_87	HLA-I	NSP13	155	165	REVLSDRELHL	11	Yes	NA	NA	NA	REVLSDREL	53663	HLA-B*40:01, HLA-B40:02, HLA-A*44:02, HLA-B*44:03, HLA-A*45:01	HLA-B*40:02	0	0	0	0	1	1	0	0	1	0.306443
EpI_NSP13_88	HLA-I	NSP13	157	165	VLSDRELHL	9	No	NA	NA	NA	NA	NA	NA	HLA-A*02:01, HLA-A*02:04, HLA-A*02:11, HLA-A*02:17, HLA-A*02:22, HLA-B*15:04, HLA-C*01:02, HLA-C*03:04, HLA-C*06:02, HLA-C*07:01, HLA-C*15:02, HLA-C*15:03, HLA-C*16:01	3	0	6	3	6	1	2	3	7	2.09846
EpI_NSP13_89	HLA-I	NSP13	159	167	SDRELHLSW	9	No	NA	NA	NA	NA	NA	NA	HLA-B*44:03	1	0	1	0	1	0	0	0	0	0.161998
EpI_NSP13_90	HLA-I	NSP13	161	169	RELHLSWEV	9	Yes	NA	NA	NA	RELHLSWEV, RELHLSWEVG	53562, 53563	HLA-B*40:01, HLA-B40:02, HLA-A*44:02, HLA-B*44:03, HLA-A*45:01	HLA-B*18:01, HLA-B*39:05, HLA-B*40:02, HLA-B*44:03	2	0	1	1	2	1	0	0	2	0.630439
EpI_NSP13_91	HLA-I	NSP13	164	173	HLSWEVGKPR	10	No	NA	NA	NA	NA	NA	NA	HLA-A*31:01, HLA-A*68:01	1	0	0	2	1	1	1	1	1	0.715756
EpI_NSP13_92	HLA-I	NSP13	165	173	LSWEVGKPR	9	No	NA	NA	NA	NA	NA	NA	HLA-A*31:01, HLA-A*68:01	1	0	0	2	1	1	1	1	1	0.715756
EpI_NSP13_93	HLA-I	NSP13	167	176	WEVGKPRPPL	10	Yes	NA	NA	NA	WEVGKPRPPL	72381	HLA-B*40:01, HLA-B*40:02	HLA-B*40:02	0	0	0	0	1	1	0	0	1	0.306443
EpI_NSP13_94	HLA-I	NSP13	168	176	EVGKPRPPL	9	Yes	NA	NA	NA	WEVGKPRPPL	72381	HLA-B*40:01, HLA-B*40:02	HLA-A*68:02	0	0	0	0	0	0	0	0	1	0.047619
EpI_NSP13_95	HLA-I	NSP13	171	180	KPRPPLNRNY	10	No	NA	NA	NA	NA	NA	NA	HLA-B*07:02, HLA-B*35:05, HLA-B*35:11, HLA-B*35:43, HLA-C*07:01	2	0	2	2	2	0	2	0	1	0.739262
EpI_NSP13_96	HLA-I	NSP13	171	181	KPRPPLNRNYV	11	Yes	NA	NA	NA	RPPLNRNYV	55258	HLA-B*07:02, HLA-B*54:01	HLA-B*07:02	1	0	1	1	0	0	0	0	0	0.161998
EpI_NSP13_97	HLA-I	NSP13	172	180	PRPPLNRNY	9	No	NA	NA	NA	NA	NA	NA	HLA-C*07:01	1	0	1	1	1	0	0	0	0	0.220822
EpI_NSP13_98	HLA-I	NSP13	173	181	RPPLNRNYV	9	Yes	NA	NA	NA	RPPLNRNYV	55258	HLA-B*07:02, HLA-B*54:01	HLA-B*07:02, HLA-B*35:12, HLA-C*01:02	1	0	1	1	1	0	0	0	2	0.31606
EpI_NSP13_99	HLA-I	NSP13	173	182	RPPLNRNYVF	10	Yes	NA	NA	NA	RPPLNRNYV	55258	HLA-B*07:02, HLA-B*54:01	HLA-B*07:02, HLA-B*35:05, HLA-B*35:11, HLA-B*35:43	1	0	1	1	1	0	2	0	1	0.518441
EpI_NSP13_100	HLA-I	NSP13	173	180	RPPLNRNY	8	Yes	NA	NA	NA	RPPLNRNYV	55258	HLA-B*07:02, HLA-B*54:01	HLA-B*35:05, HLA-B*35:11	0	0	0	0	0	0	2	0	0	0.25
EpI_NSP13_101	HLA-I	NSP13	174	182	PPLNRNYVF	9	No	NA	NA	NA	NA	NA	NA	HLA-B*08:01, HLA-B*35:01, HLA-B*35:05, HLA-B*35:11, HLA-B*35:12	2	0	2	1	0	0	2	1	1	0.673903
EpI_NSP13_102	HLA-I	NSP13	177	185	NRNYVFTGY	9	No	NA	NA	NA	NA	NA	NA	HLA-B*39:05, HLA-C*07:01	1	0	1	1	1	0	0	0	1	0.268441
EpI_NSP13_103	HLA-I	NSP13	178	186	RNYVFTGYR	9	No	NA	NA	NA	NA	NA	NA	HLA-A*31:01	1	0	0	1	0	0	1	1	1	0.398109
EpI_NSP13_104	HLA-I	NSP13	179	187	NYVFTGYRV	9	No	NA	NA	NA	NA	NA	NA	HLA-A*23:01, HLA-A*24:02	1	0	2	1	1	1	0	1	1	0.627171
EpI_NSP13_105	HLA-I	NSP13	180	187	YVFTGYRV	8	Yes	NA	NA	NA	YVFTGYRVTK	76273	HLA-A*03:01, HLA-A*11:01, HLA-A*31:01, HLA-A*33:01, HLA-A*68:01	HLA-A*02:04, HLA-A*68:02, HLA-C*15:03	0	0	0	0	0	0	0	0	3	0.142857
EpI_NSP13_106	HLA-I	NSP13	180	189	YVFTGYRVTK	10	Yes	NA	NA	NA	VFTGYRVTK, YVFTGYRVTK	68583, 76273	HLA-A*03:01, HLA-A*11:01, HLA-A*31:01, HLA-A*33:01, HLA-A*68:01	HLA-A*03:01, HLA-A*11:01, HLA-A*31:01, HLA-A*68:01	3	0	2	3	2	2	1	1	1	1.23975
EpI_NSP13_107	HLA-I	NSP13	180	188	YVFTGYRVT	9	Yes	NA	NA	NA	YVFTGYRVTK	76273	HLA-A*03:01, HLA-A*11:01, HLA-A*31:01, HLA-A*33:01, HLA-A*68:01	HLA-C*03:04	0	0	1	0	1	0	0	1	1	0.265173
EpI_NSP13_108	HLA-I	NSP13	181	189	VFTGYRVTK	9	Yes	NA	NA	NA	VFTGYRVTK, YVFTGYRVTK	68583, 76273	HLA-A*03:01, HLA-A*11:01, HLA-A*31:01, HLA-A*33:01, HLA-A*68:01	HLA-A*31:01	1	0	0	1	0	0	1	1	1	0.398109
EpI_NSP13_109	HLA-I	NSP13	185	193	YRVTKNSKV	9	No	NA	NA	NA	NA	NA	NA	HLA-B*39:05, HLA-B*39:09, HLA-C*06:02, HLA-C*07:01	2	0	2	3	2	0	0	0	2	0.595705
EpI_NSP13_110	HLA-I	NSP13	187	195	VTKNSKVQI	9	No	NA	NA	NA	NA	NA	NA	HLA-C*15:03	0	0	0	0	0	0	0	0	1	0.047619
EpI_NSP13_111	HLA-I	NSP13	190	198	NSKVQIGEY	9	Yes	NA	NA	NA	NSKVQIGEY	45883	HLA-A*26:01, HLA-A*29:02, HLA-A*30:02	HLA-B*15:01, HLA-B*15:04, HLA-B*35:05, HLA-B*35:11, HLA-B*35:43	0	0	0	0	1	0	3	0	2	0.529062
EpI_NSP13_112	HLA-I	NSP13	191	200	SKVQIGEYTF	10	No	NA	NA	NA	NA	NA	NA	HLA-B*39:05	0	0	0	0	0	0	0	0	1	0.047619
EpI_NSP13_113	HLA-I	NSP13	192	202	KVQIGEYTFEK	11	Yes	NA	NA	NA	QIGEYTFEK, VQIGEYTFEK	51068, 70577	HLA-A*03:01, HLA-A*11:01, HLA-A*31:01, HLA-A*68:01	HLA-A*03:01, HLA-A*11:01	2	0	2	1	1	1	0	0	0	0.523996
EpI_NSP13_114	HLA-I	NSP13	192	200	KVQIGEYTF	9	No	NA	NA	NA	NA	NA	NA	HLA-A*24:02, HLA-B*15:01, HLA-B*15:04, HLA-B*35:01, HLA-B*35:05, HLA-B*35:11, HLA-B*35:43, HLA-C*01:02, HLA-C*03:04, HLA-C*15:03, HLA-C*16:01	2	0	4	2	5	1	3	3	6	1.9074
EpI_NSP13_115	HLA-I	NSP13	193	202	VQIGEYTFEK	10	Yes	NA	NA	NA	QIGEYTFEK, VQIGEYTFEK	51068, 70577	HLA-A*03:01, HLA-A*11:01, HLA-A*31:01, HLA-A*68:01	HLA-A*03:01, HLA-A*11:01	2	0	2	1	1	1	0	0	0	0.523996
EpI_NSP13_116	HLA-I	NSP13	193	200	VQIGEYTF	8	Yes	NA	NA	NA	VQIGEYTFEK	70577	HLA-A*03:01, HLA-A*11:01, HLA-A*31:01, HLA-A*68:01	HLA-A*23:01, HLA-A*24:02, HLA-B*15:01, HLA-B*15:04, HLA-B*18:01	2	0	2	2	1	1	1	1	2	0.914169
EpI_NSP13_117	HLA-I	NSP13	194	202	QIGEYTFEK	9	Yes	NA	NA	NA	QIGEYTFEK, VQIGEYTFEK	51068, 70577	HLA-A*03:01, HLA-A*11:01, HLA-A*31:01, HLA-A*68:01	HLA-A*03:01, HLA-A*11:01, HLA-A*68:01	2	0	2	2	2	2	0	0	0	0.841643
EpI_NSP13_118	HLA-I	NSP13	196	205	GEYTFEKGDY	10	No	NA	NA	NA	NA	NA	NA	HLA-B*44:03	1	0	1	0	1	0	0	0	0	0.161998
EpI_NSP13_119	HLA-I	NSP13	198	205	YTFEKGDY	8	No	NA	NA	NA	NA	NA	NA	HLA-A*01:01, HLA-A*29:02, HLA-B*15:01, HLA-B*35:05, HLA-B*35:11, HLA-B*35:43	1	0	1	2	2	0	2	0	2	0.683707
EpI_NSP13_120	HLA-I	NSP13	202	211	KGDYGDAVVY	10	No	NA	NA	NA	NA	NA	NA	HLA-B*15:04	0	0	0	0	0	0	1	0	0	0.125
EpI_NSP13_121	HLA-I	NSP13	202	210	KGDYGDAVV	9	No	NA	NA	NA	NA	NA	NA	HLA-C*05:01	1	0	1	1	1	0	0	0	0	0.220822
EpI_NSP13_122	HLA-I	NSP13	203	211	GDYGDAVVY	9	No	NA	NA	NA	NA	NA	NA	HLA-B*15:04	0	0	0	0	0	0	1	0	0	0.125
EpI_NSP13_123	HLA-I	NSP13	204	212	DYGDAVVYR	9	No	NA	NA	NA	NA	NA	NA	HLA-A*31:01, HLA-A*68:01	1	0	0	2	1	1	1	1	1	0.715756
EpI_NSP13_124	HLA-I	NSP13	207	217	DAVVYRGTTTY	11	Yes	NA	NA	NA	AVVYRGTTTY, VVYRGTTTY	5610, 71917	HLA-A*03:01, HLA-A*11:01, HLA-A*68:01, HLA-B*15:01, HLA-B*58:01, HLA-B*35:01	HLA-B*35:01, HLA-B*35:05, HLA-B*35:11, HLA-B*35:43	1	0	1	1	1	0	2	1	1	0.629552
EpI_NSP13_125	HLA-I	NSP13	208	217	AVVYRGTTTY	10	Yes	NA	NA	NA	AVVYRGTTTY, VVYRGTTTY	5610, 71917	HLA-A*03:01, HLA-A*11:01, HLA-A*68:01, HLA-B*15:01, HLA-B*58:01, HLA-B*35:01	HLA-A*03:01, HLA-A*11:01, HLA-B*15:01, HLA-B*15:04, HLA-B*35:05, HLA-B*35:11, HLA-B*35:43	2	0	2	1	2	1	3	0	2	1.05306
EpI_NSP13_126	HLA-I	NSP13	208	218	AVVYRGTTTYK	11	Yes	NA	NA	NA	AVVYRGTTTY, VVYRGTTTY, VVYRGTTTYK	5610, 71917, 71918	HLA-A*03:01, HLA-A*11:01, HLA-A*68:01, HLA-B*15:01, HLA-B*58:01, HLA-B*35:01, HLA-A*31:01	HLA-A*03:01, HLA-A*11:01, HLA-A*68:01	2	0	2	2	2	2	0	0	0	0.841643
EpI_NSP13_127	HLA-I	NSP13	209	217	VVYRGTTTY	9	Yes	NA	NA	NA	AVVYRGTTTY, VVYRGTTTY, VVYRGTTTYK	5610, 71917, 71918	HLA-A*03:01, HLA-A*11:01, HLA-A*68:01, HLA-B*15:01, HLA-B*58:01, HLA-B*35:01, HLA-A*31:01	HLA-A*03:01, HLA-A*11:01, HLA-A*29:02, HLA-B*15:01, HLA-B*15:04, HLA-B*35:01, HLA-B*35:05, HLA-B*35:11, HLA-B*35:12, HLA-B*35:43, HLA-C*01:02, HLA-C*03:04, HLA-C*06:02, HLA-C*07:01, HLA-C*15:03, HLA-C*16:01	5	0	7	5	7	1	3	2	6	2.39993
EpI_NSP13_128	HLA-I	NSP13	209	218	VVYRGTTTYK	10	Yes	NA	NA	NA	VVYRGTTTY, VVYRGTTTYK	71917, 71918	HLA-A*03:01, HLA-A*11:01, HLA-B*15:01, HLA-B*58:01, HLA-B*35:01, HLA-B*35:01, HLA-A*68:01	HLA-A*03:01, HLA-A*11:01, HLA-A*31:01, HLA-A*68:01, HLA-B*15:04	3	0	2	3	2	2	2	1	1	1.36475
EpI_NSP13_129	HLA-I	NSP13	210	219	VYRGTTTYKL	10	Yes	NA	NA	NA	VYRGTTTYKL	72148	HLA-A*01:01, HLA-A*23:01, HLA-A*24:02, HLA-A*26:01, HLA-A*29:02	HLA-A*23:01, HLA-A*24:02	1	0	2	1	1	1	0	1	1	0.627171
EpI_NSP13_130	HLA-I	NSP13	210	217	VYRGTTTY	8	Yes	NA	NA	NA	AVVYRGTTTY, VVYRGTTTY, VVYRGTTTYK, VYRGTTTYKL	5610, 71917, 71918, 72148	HLA-A*03:01, HLA-A*11:01, HLA-A*68:01, HLA-B*15:01, HLA-B*58:01, HLA-B*35:01, HLA-A*31:01, HLA-A*01:01, HLA-A*23:01, HLA-A*24:02, HLA-A*26:01, HLA-A*29:02	HLA-A*29:02, HLA-B*15:04, HLA-B*35:11, HLA-B*35:43	0	0	0	1	1	0	2	0	1	0.415266
EpI_NSP13_131	HLA-I	NSP13	210	218	VYRGTTTYK	9	Yes	NA	NA	NA	VVYRGTTTYK, VYRGTTTYKL	71918, 72148	HLA-A*03:01, HLA-A*11:01, HLA-A*31:01, HLA-A*68:01, HLA-A*01:01, HLA-A*23:01, HLA-A*24:02, HLA-A*26:01, HLA-A*29:02	HLA-A*31:01	1	0	0	1	0	0	1	1	1	0.398109
EpI_NSP13_132	HLA-I	NSP13	211	219	YRGTTTYKL	9	Yes	NA	NA	NA	VYRGTTTYKL	72148	HLA-A*01:01, HLA-A*23:01, HLA-A*24:02, HLA-A*26:01, HLA-A*29:02	HLA-B*39:05, HLA-B*39:09, HLA-C*06:02, HLA-C*07:01, HLA-C*07:02	3	0	3	4	3	0	0	1	3	0.975257
EpI_NSP13_133	HLA-I	NSP13	213	221	GTTTYKLNV	9	No	NA	NA	NA	NA	NA	NA	HLA-C*15:03	0	0	0	0	0	0	0	0	1	0.047619
EpI_NSP13_134	HLA-I	NSP13	214	224	TTTYKLNVGDY	11	Yes	NA	NA	NA	TTYKLNVGDY	66920	HLA-A*01:01, HLA-A*26:01, HLA-A*29:02, HLA-A*30:02	HLA-A*01:01	1	0	1	1	1	0	0	0	0	0.220822
EpI_NSP13_135	HLA-I	NSP13	215	224	TTYKLNVGDY	10	Yes	NA	NA	NA	TTYKLNVGDY	66920	HLA-A*01:01, HLA-A*26:01, HLA-A*29:02, HLA-A*30:02	HLA-A*68:01, HLA-B*15:01, HLA-B*15:04	0	0	0	1	1	1	1	0	1	0.490266
EpI_NSP13_136	HLA-I	NSP13	216	225	TYKLNVGDYF	10	No	NA	NA	NA	NA	NA	NA	HLA-A*23:01, HLA-A*24:02	1	0	2	1	1	1	0	1	1	0.627171
EpI_NSP13_137	HLA-I	NSP13	217	226	YKLNVGDYFV	10	Yes	NA	NA	NA	KLNVGDYFV	32060	HLA-A*02:01, HLA-A*02:02, HLA-A*02:03, HLA-A*02:06, HLA-A*68:02	HLA-A*02:01, HLA-A*02:04, HLA-A*02:22	1	0	1	1	1	1	0	1	3	0.67479
EpI_NSP13_138	HLA-I	NSP13	217	225	YKLNVGDYF	9	No	NA	NA	NA	NA	NA	NA	HLA-A*23:01, HLA-B*39:05, HLA-B*39:09, HLA-C*07:01	1	0	2	2	1	0	0	0	2	0.422502
EpI_NSP13_139	HLA-I	NSP13	218	226	KLNVGDYFV	9	Yes	NA	NA	NA	KLNVGDYFV	32060	HLA-A*02:01, HLA-A*02:02, HLA-A*02:03, HLA-A*02:06, HLA-A*68:02	HLA-A*02:01, HLA-A*02:04, HLA-A*02:11, HLA-A*02:17, HLA-A*02:22, HLA-C*15:03	1	0	1	1	1	1	1	2	5	1.00614
EpI_NSP13_140	HLA-I	NSP13	218	227	KLNVGDYFVL	10	Yes	NA	NA	NA	KLNVGDYFV	32060	HLA-A*02:01, HLA-A*02:02, HLA-A*02:03, HLA-A*02:06, HLA-A*68:02	HLA-A*02:01, HLA-A*02:04, HLA-A*02:11, HLA-A*02:22	1	0	1	1	1	1	1	2	3	0.910901
EpI_NSP13_141	HLA-I	NSP13	218	225	KLNVGDYF	8	Yes	NA	NA	NA	KLNVGDYFV	32060	HLA-A*02:01, HLA-A*02:02, HLA-A*02:03, HLA-A*02:06, HLA-A*68:02	HLA-B*15:01	0	0	0	0	0	0	0	0	1	0.047619
EpI_NSP13_142	HLA-I	NSP13	219	227	LNVGDYFVL	9	No	NA	NA	NA	NA	NA	NA	HLA-B*39:05, HLA-B*39:09	0	0	0	1	0	0	0	0	2	0.154062
EpI_NSP13_143	HLA-I	NSP13	224	232	YFVLTSHTV	9	No	NA	NA	NA	NA	NA	NA	HLA-A*02:04, HLA-A*23:01, HLA-B*39:09, HLA-C*01:02, HLA-C*03:04, HLA-C*07:01	1	0	3	2	3	0	0	1	4	0.794118
EpI_NSP13_144	HLA-I	NSP13	225	233	FVLTSHTVM	9	No	NA	NA	NA	NA	NA	NA	HLA-B*15:01, HLA-B*15:04, HLA-B*35:01, HLA-B*35:05, HLA-B*35:11, HLA-B*35:12, HLA-B*35:43, HLA-B*39:09, HLA-C*01:02, HLA-C*03:04, HLA-C*07:01, HLA-C*15:03, HLA-C*16:01	2	0	4	3	5	0	3	2	7	1.70273
EpI_NSP13_145	HLA-I	NSP13	226	235	VLTSHTVMPL	10	No	NA	NA	NA	NA	NA	NA	HLA-A*02:17, HLA-A*02:22	0	0	0	0	0	0	0	0	2	0.0952381
EpI_NSP13_146	HLA-I	NSP13	227	235	LTSHTVMPL	9	No	NA	NA	NA	NA	NA	NA	HLA-A*68:02, HLA-C*01:02, HLA-C*03:03, HLA-C*03:04, HLA-C*15:02, HLA-C*15:03, HLA-C*16:01	0	0	4	0	3	0	0	1	4	0.668534
EpI_NSP13_147	HLA-I	NSP13	229	237	SHTVMPLSA	9	No	NA	NA	NA	NA	NA	NA	HLA-B*39:05, HLA-B*39:09	0	0	0	1	0	0	0	0	2	0.154062
EpI_NSP13_148	HLA-I	NSP13	231	240	TVMPLSAPTL	10	No	NA	NA	NA	NA	NA	NA	HLA-A*02:04, HLA-A*68:02, HLA-C*01:02, HLA-C*03:04, HLA-C*15:03, HLA-C*16:01	0	0	2	0	3	0	0	1	5	0.620915
EpI_NSP13_149	HLA-I	NSP13	231	239	TVMPLSAPT	9	No	NA	NA	NA	NA	NA	NA	HLA-A*68:02	0	0	0	0	0	0	0	0	1	0.047619
EpI_NSP13_150	HLA-I	NSP13	231	241	TVMPLSAPTLV	11	No	NA	NA	NA	NA	NA	NA	HLA-A*68:02	0	0	0	0	0	0	0	0	1	0.047619
EpI_NSP13_151	HLA-I	NSP13	232	241	VMPLSAPTLV	10	No	NA	NA	NA	NA	NA	NA	HLA-A*02:01, HLA-A*02:04, HLA-A*02:11, HLA-A*02:22, HLA-B*35:12	1	0	1	1	1	1	1	2	4	0.95852
EpI_NSP13_152	HLA-I	NSP13	232	240	VMPLSAPTL	9	No	NA	NA	NA	NA	NA	NA	HLA-A*02:04, HLA-A*02:11, HLA-A*02:22, HLA-B*15:04, HLA-B*39:09, HLA-C*01:02, HLA-C*03:04, HLA-C*07:01, HLA-C*15:03, HLA-C*16:01	1	0	3	2	4	0	2	2	6	1.30929
EpI_NSP13_153	HLA-I	NSP13	233	240	MPLSAPTL	8	No	NA	NA	NA	NA	NA	NA	HLA-B*07:02, HLA-B*08:01, HLA-B*35:01, HLA-B*35:05, HLA-B*35:11, HLA-B*35:12, HLA-B*35:43, HLA-B*39:09, HLA-B*51:01	4	0	4	4	2	0	2	2	3	1.38072
EpI_NSP13_154	HLA-I	NSP13	233	241	MPLSAPTLV	9	No	NA	NA	NA	NA	NA	NA	HLA-B*35:01, HLA-B*35:05, HLA-B*35:11, HLA-B*35:12, HLA-B*35:43, HLA-B*39:05, HLA-B*39:09, HLA-B*51:01, HLA-C*01:02, HLA-C*03:04	2	0	3	3	4	0	2	3	6	1.53478
EpI_NSP13_155	HLA-I	NSP13	237	247	APTLVPQEHYV	11	Yes	NA	NA	NA	PTLVPQEHY, TLVPQEHYV	49708, 65132	HLA-A*30:02, HLA-A*02:01, HLA-A*69:01	HLA-A*02:22	0	0	0	0	0	0	0	0	1	0.047619
EpI_NSP13_156	HLA-I	NSP13	237	245	APTLVPQEH	9	No	NA	NA	NA	NA	NA	NA	HLA-B*35:05, HLA-B*35:11, HLA-B*35:43	0	0	0	0	1	0	2	0	1	0.356443
EpI_NSP13_157	HLA-I	NSP13	237	246	APTLVPQEHY	10	Yes	NA	NA	NA	PTLVPQEHY	49708	HLA-A*30:02	HLA-B*35:05, HLA-B*35:11, HLA-B*35:43	0	0	0	0	1	0	2	0	1	0.356443
EpI_NSP13_158	HLA-I	NSP13	238	247	PTLVPQEHYV	10	Yes	NA	NA	NA	PTLVPQEHY, TLVPQEHYV	49708, 65132	HLA-A*30:02, HLA-A*02:01, HLA-A*69:01	HLA-A*02:22	0	0	0	0	0	0	0	0	1	0.047619
EpI_NSP13_159	HLA-I	NSP13	239	247	TLVPQEHYV	9	Yes	NA	NA	NA	TLVPQEHYV, TLVPQEHYVR	65132, 65133	HLA-A*02:01, HLA-A*69:01, HLA-A*03:01, HLA-A*11:01, HLA-A*31:01, HLA-A*33:01, HLA-A*68:01	HLA-A*02:01, HLA-A*02:04, HLA-A*02:11, HLA-A*02:17, HLA-A*02:22, HLA-A*68:02, HLA-C*15:03	1	0	1	1	1	1	1	2	6	1.05376
EpI_NSP13_160	HLA-I	NSP13	239	248	TLVPQEHYVR	10	Yes	NA	NA	NA	TLVPQEHYV, TLVPQEHYVR	65132, 65133	HLA-A*02:01, HLA-A*69:01, HLA-A*03:01, HLA-A*11:01, HLA-A*31:01, HLA-A*33:01, HLA-A*68:01	HLA-A*31:01, HLA-A*68:01	1	0	0	2	1	1	1	1	1	0.715756
EpI_NSP13_161	HLA-I	NSP13	239	246	TLVPQEHY	8	Yes	NA	NA	NA	PTLVPQEHY, TLVPQEHYV, TLVPQEHYVR	49708, 65132, 65133	HLA-A*30:02, HLA-A*02:01, HLA-A*69:01, HLA-A*03:01, HLA-A*11:01, HLA-A*31:01, HLA-A*33:01, HLA-A*68:01	HLA-B*15:01	0	0	0	0	0	0	0	0	1	0.047619
EpI_NSP13_162	HLA-I	NSP13	240	248	LVPQEHYVR	9	Yes	NA	NA	NA	TLVPQEHYVR	65133	HLA-A*03:01, HLA-A*11:01, HLA-A*31:01, HLA-A*33:01, HLA-A*68:01	HLA-A*31:01, HLA-A*68:01	1	0	0	2	1	1	1	1	1	0.715756
EpI_NSP13_163	HLA-I	NSP13	241	249	VPQEHYVRI	9	No	NA	NA	NA	NA	NA	NA	HLA-B*35:05, HLA-B*35:11, HLA-B*35:12, HLA-B*35:43, HLA-C*01:02, HLA-C*03:04	0	0	1	0	3	0	2	1	4	0.775677
EpI_NSP13_164	HLA-I	NSP13	243	252	QEHYVRITGL	10	Yes	NA	NA	NA	EHYVRITGL	12380	HLA-B*08:01	HLA-B*39:05, HLA-B*39:09, HLA-B*40:02, HLA-B*44:03	1	0	1	1	2	1	0	0	3	0.622502
EpI_NSP13_165	HLA-I	NSP13	243	253	QEHYVRITGLY	11	Yes	NA	NA	NA	EHYVRITGL, HYVRITGLY	12380, 25208	HLA-B*08:01, HLA-A*26:01, HLA-A29:02	HLA-B*44:03	1	0	1	0	1	0	0	0	0	0.161998
EpI_NSP13_166	HLA-I	NSP13	244	252	EHYVRITGL	9	Yes	NA	NA	NA	EHYVRITGL	12380	HLA-B*08:01	HLA-B*39:05, HLA-B*39:09, HLA-C*07:01	1	0	1	2	1	0	0	0	2	0.374883
EpI_NSP13_167	HLA-I	NSP13	245	253	HYVRITGLY	9	Yes	NA	NA	NA	HYVRITGLY	25208	HLA-A*26:01, HLA-A29:02	HLA-A*29:02, HLA-C*07:01	1	0	1	2	1	0	0	0	0	0.279645
EpI_NSP13_168	HLA-I	NSP13	246	253	YVRITGLY	8	Yes	NA	NA	NA	HYVRITGLY	25208	HLA-A*26:01, HLA-A29:02	HLA-A*29:02, HLA-B*15:01, HLA-B*15:04, HLA-B*35:05, HLA-B*35:11, HLA-B*35:43	0	0	0	1	1	0	3	0	2	0.587885
EpI_NSP13_169	HLA-I	NSP13	247	256	VRITGLYPTL	10	No	NA	NA	NA	NA	NA	NA	HLA-B*39:05, HLA-B*39:09, HLA-C*07:01	1	0	1	2	1	0	0	0	2	0.374883
EpI_NSP13_170	HLA-I	NSP13	248	256	RITGLYPTL	9	No	NA	NA	NA	NA	NA	NA	HLA-A*02:04, HLA-A*02:22, HLA-C*01:02, HLA-C*03:04, HLA-C*15:03, HLA-C*16:01	0	0	2	0	3	0	0	1	5	0.620915
EpI_NSP13_171	HLA-I	NSP13	250	258	TGLYPTLNI	9	No	NA	NA	NA	NA	NA	NA	HLA-C*15:03, HLA-C*16:01	0	0	1	0	1	0	0	0	1	0.154062
EpI_NSP13_172	HLA-I	NSP13	251	258	GLYPTLNI	8	No	NA	NA	NA	NA	NA	NA	HLA-A*02:01, HLA-A*02:04	1	0	1	1	1	1	0	1	2	0.627171
EpI_NSP13_173	HLA-I	NSP13	251	259	GLYPTLNIS	9	No	NA	NA	NA	NA	NA	NA	HLA-A*02:04, HLA-A*02:22	0	0	0	0	0	0	0	0	2	0.0952381
EpI_NSP13_174	HLA-I	NSP13	252	262	LYPTLNISDEF	11	No	NA	NA	NA	NA	NA	NA	HLA-A*24:02	1	0	1	1	1	1	0	1	1	0.579552
EpI_NSP13_175	HLA-I	NSP13	253	262	YPTLNISDEF	10	No	NA	NA	NA	NA	NA	NA	HLA-B*35:01, HLA-B*35:05, HLA-B*35:11, HLA-B*35:12, HLA-B*35:43	1	0	1	1	1	0	2	1	2	0.677171
EpI_NSP13_176	HLA-I	NSP13	257	266	NISDEFSSNV	10	No	NA	NA	NA	NA	NA	NA	HLA-A*68:02	0	0	0	0	0	0	0	0	1	0.047619
EpI_NSP13_177	HLA-I	NSP13	258	267	ISDEFSSNVA	10	No	NA	NA	NA	NA	NA	NA	HLA-A*01:01	1	0	1	1	1	0	0	0	0	0.220822
EpI_NSP13_178	HLA-I	NSP13	258	266	ISDEFSSNV	9	No	NA	NA	NA	NA	NA	NA	HLA-A*02:04, HLA-A*02:11, HLA-C*01:02, HLA-C*03:04, HLA-C*04:01, HLA-C*05:01, HLA-C*08:02, HLA-C*15:02, HLA-C*15:03	2	0	5	2	4	0	1	3	5	1.39858
EpI_NSP13_179	HLA-I	NSP13	260	267	DEFSSNVA	8	No	NA	NA	NA	NA	NA	NA	HLA-B*18:01	1	0	0	1	0	0	0	0	0	0.114379
EpI_NSP13_180	HLA-I	NSP13	260	268	DEFSSNVAN	9	No	NA	NA	NA	NA	NA	NA	HLA-B*18:01	1	0	0	1	0	0	0	0	0	0.114379
EpI_NSP13_181	HLA-I	NSP13	260	269	DEFSSNVANY	10	Yes	NA	NA	NA	EFSSNVANY	12077	HLA-A*26:01, HLA-A*29:02, HLA-A*30:02	HLA-B*18:01, HLA-B*44:03	2	0	1	1	1	0	0	0	0	0.276377
EpI_NSP13_182	HLA-I	NSP13	261	269	EFSSNVANY	9	Yes	NA	NA	NA	EFSSNVANY	12077	HLA-A*26:01, HLA-A*29:02, HLA-A*30:02	HLA-A*29:02, HLA-B*35:05, HLA-B*35:11, HLA-B*35:43	0	0	0	1	1	0	2	0	1	0.415266
EpI_NSP13_183	HLA-I	NSP13	262	269	FSSNVANY	8	Yes	NA	NA	NA	EFSSNVANY	12077	HLA-A*26:01, HLA-A*29:02, HLA-A*30:02	HLA-A*01:01, HLA-A*29:02, HLA-B*35:43	1	0	1	2	2	0	0	0	1	0.386088
EpI_NSP13_184	HLA-I	NSP13	262	271	FSSNVANYQK	10	Yes	NA	NA	NA	SSNVANYQK	61254	HLA-A*11:01, HLA-A*03:01, HLA-A*31:01, HLA-A*68:01	HLA-A*11:01, HLA-A*68:01	1	0	1	1	1	1	0	0	0	0.420822
EpI_NSP13_185	HLA-I	NSP13	262	270	FSSNVANYQ	9	No	NA	NA	NA	NA	NA	NA	HLA-A*68:01	0	0	0	1	1	1	0	0	0	0.317647
EpI_NSP13_186	HLA-I	NSP13	263	271	SSNVANYQK	9	Yes	NA	NA	NA	SSNVANYQK	61254	HLA-A*11:01, HLA-A*03:01, HLA-A*31:01, HLA-A*68:01	HLA-A*11:01, HLA-A*31:01, HLA-A*68:01	2	0	1	2	1	1	1	1	1	0.818931
EpI_NSP13_187	HLA-I	NSP13	265	274	NVANYQKVGM	10	No	NA	NA	NA	NA	NA	NA	HLA-A*68:02	0	0	0	0	0	0	0	0	1	0.047619
EpI_NSP13_188	HLA-I	NSP13	266	274	VANYQKVGM	9	No	NA	NA	NA	NA	NA	NA	HLA-B*35:05, HLA-B*35:11, HLA-B*35:12, HLA-B*35:43, HLA-C*01:02, HLA-C*03:04, HLA-C*15:02, HLA-C*15:03, HLA-C*16:01	0	0	3	0	4	0	2	1	5	0.977358
EpI_NSP13_189	HLA-I	NSP13	267	276	ANYQKVGMQK	10	No	NA	NA	NA	NA	NA	NA	HLA-A*03:01, HLA-A*11:01	2	0	2	1	1	1	0	0	0	0.523996
EpI_NSP13_190	HLA-I	NSP13	268	277	NYQKVGMQKY	10	Yes	NA	NA	NA	YQKVGMQKY	75508	HLA-B*15:01, HLA-B*27:05	HLA-B*15:04	0	0	0	0	0	0	1	0	0	0.125
EpI_NSP13_191	HLA-I	NSP13	269	277	YQKVGMQKY	9	Yes	NA	NA	NA	YQKVGMQKY	75508	HLA-B*15:01, HLA-B*27:05	HLA-B*15:01, HLA-B*15:04, HLA-B*35:05, HLA-B*35:11, HLA-B*35:43, HLA-C*07:01	1	0	1	1	2	0	3	0	2	0.749883
EpI_NSP13_192	HLA-I	NSP13	271	280	KVGMQKYSTL	10	No	NA	NA	NA	NA	NA	NA	HLA-B*08:01	1	0	1	0	0	0	0	0	0	0.103175
EpI_NSP13_193	HLA-I	NSP13	272	280	VGMQKYSTL	9	No	NA	NA	NA	NA	NA	NA	HLA-B*08:01, HLA-C*01:02, HLA-C*03:04, HLA-C*07:01, HLA-C*15:03, HLA-C*16:01	2	0	4	1	4	0	0	1	3	0.849673
EpI_NSP13_194	HLA-I	NSP13	273	280	GMQKYSTL	8	No	NA	NA	NA	NA	NA	NA	HLA-B*08:01	1	0	1	0	0	0	0	0	0	0.103175
EpI_NSP13_195	HLA-I	NSP13	278	288	STLQGPPGTGK	11	Yes	NA	NA	NA	LQGPPGTGK, TLQGPPGTGK	38844, 65023	HLA-A*03:01, HLA-A*11:01, HLA-A*31:01, HLA-A*68:01	HLA-A*03:01, HLA-A*11:01, HLA-A*68:01	2	0	2	2	2	2	0	0	0	0.841643
EpI_NSP13_196	HLA-I	NSP13	279	288	TLQGPPGTGK	10	Yes	NA	NA	NA	LQGPPGTGK, TLQGPPGTGK	38844, 65023	HLA-A*03:01, HLA-A*11:01, HLA-A*31:01, HLA-A*68:01	HLA-A*03:01, HLA-A*11:01	2	0	2	1	1	1	0	0	0	0.523996
EpI_NSP13_197	HLA-I	NSP13	285	293	GTGKSHFAI	9	No	NA	NA	NA	NA	NA	NA	HLA-C*15:03	0	0	0	0	0	0	0	0	1	0.047619
EpI_NSP13_198	HLA-I	NSP13	287	295	GKSHFAIGL	9	No	NA	NA	NA	NA	NA	NA	HLA-B*39:05, HLA-B*39:09, HLA-C*07:01	1	0	1	2	1	0	0	0	2	0.374883
EpI_NSP13_199	HLA-I	NSP13	287	297	GKSHFAIGLAL	11	No	NA	NA	NA	NA	NA	NA	HLA-B*39:05, HLA-B*39:09	0	0	0	1	0	0	0	0	2	0.154062
EpI_NSP13_200	HLA-I	NSP13	288	298	KSHFAIGLALY	11	Yes	NA	NA	NA	HFAIGLALY	23757	HLA-A*26:01, HLA-A*29:02, HLA-A*30:02	HLA-A*29:02	0	0	0	1	0	0	0	0	0	0.0588235
EpI_NSP13_201	HLA-I	NSP13	288	297	KSHFAIGLAL	10	No	NA	NA	NA	NA	NA	NA	HLA-B*39:05, HLA-B*39:09, HLA-C*03:04, HLA-C*15:03, HLA-C*16:01	0	0	2	1	2	0	0	1	4	0.573296
EpI_NSP13_202	HLA-I	NSP13	289	298	SHFAIGLALY	10	Yes	NA	NA	NA	HFAIGLALY	23757	HLA-A*26:01, HLA-A*29:02, HLA-A*30:02	HLA-A*29:02, HLA-B*15:04, HLA-B*39:05, HLA-B*39:09, HLA-C*07:01	1	0	1	3	1	0	1	0	2	0.558707
EpI_NSP13_203	HLA-I	NSP13	289	299	SHFAIGLALYY	11	Yes	NA	NA	NA	HFAIGLALY, HFAIGLALYY	23757, 23758	HLA-A*26:01, HLA-A*29:02, HLA-A*30:02, HLA-A*01:01	HLA-A*29:02, HLA-B*39:05	0	0	0	1	0	0	0	0	1	0.106443
EpI_NSP13_204	HLA-I	NSP13	289	297	SHFAIGLAL	9	No	NA	NA	NA	NA	NA	NA	HLA-B*15:04, HLA-B*35:12, HLA-B*39:05, HLA-B*39:06, HLA-B*39:09, HLA-C*01:02, HLA-C*03:04, HLA-C*04:01, HLA-C*06:02, HLA-C*07:01, HLA-C*16:01	3	0	5	4	6	0	1	2	7	1.67355
EpI_NSP13_205	HLA-I	NSP13	290	298	HFAIGLALY	9	Yes	NA	NA	NA	HFAIGLALY, HFAIGLALYY	23757, 23758	HLA-A*26:01, HLA-A*29:02, HLA-A*30:02, HLA-A*01:01	HLA-A*29:02, HLA-B*15:04, HLA-B*35:05, HLA-B*35:11, HLA-B*35:43, HLA-C*07:01	1	0	1	2	2	0	3	0	1	0.761088
EpI_NSP13_206	HLA-I	NSP13	290	299	HFAIGLALYY	10	Yes	NA	NA	NA	HFAIGLALY, HFAIGLALYY	23757, 23758	HLA-A*26:01, HLA-A*29:02, HLA-A*30:02, HLA-A*01:01	HLA-A*29:02, HLA-B*35:05, HLA-B*35:11, HLA-B*35:43	0	0	0	1	1	0	2	0	1	0.415266
EpI_NSP13_207	HLA-I	NSP13	290	297	HFAIGLAL	8	Yes	NA	NA	NA	HFAIGLALY, HFAIGLALYY	23757, 23758	HLA-A*26:01, HLA-A*29:02, HLA-A*30:02, HLA-A*01:01	HLA-B*39:05, HLA-B*39:09	0	0	0	1	0	0	0	0	2	0.154062
EpI_NSP13_208	HLA-I	NSP13	291	299	FAIGLALYY	9	Yes	NA	NA	NA	HFAIGLALYY	23758	HLA-A*01:01, HLA-A*26:01, HLA-A*29:02, HLA-A*30:02	HLA-A*01:01, HLA-A*29:02, HLA-A*68:01, HLA-B*15:01, HLA-B*15:04, HLA-B*35:01, HLA-B*35:05, HLA-B*35:11, HLA-B*35:12, HLA-B*35:43, HLA-C*03:03, HLA-C*03:04, HLA-C*06:02, HLA-C*07:01, HLA-C*07:02, HLA-C*12:03, HLA-C*15:02, HLA-C*15:03, HLA-C*16:01	6	0	9	7	8	1	3	3	6	2.83831
EpI_NSP13_209	HLA-I	NSP13	291	298	FAIGLALY	8	Yes	NA	NA	NA	HFAIGLALY, HFAIGLALYY	23757, 23758	HLA-A*26:01, HLA-A*29:02, HLA-A*30:02, HLA-A*01:01	HLA-A*29:02, HLA-B*15:01, HLA-B*35:01, HLA-B*35:05, HLA-B*35:11, HLA-B*35:43	1	0	1	2	1	0	2	1	2	0.735994
EpI_NSP13_210	HLA-I	NSP13	292	299	AIGLALYY	8	Yes	NA	NA	NA	HFAIGLALYY	23758	HLA-A*01:01, HLA-A*26:01, HLA-A*29:02, HLA-A*30:02	HLA-A*29:02	0	0	0	1	0	0	0	0	0	0.0588235
EpI_NSP13_211	HLA-I	NSP13	294	302	GLALYYPSA	9	Yes	NA	NA	NA	GLALYYPSAR	20764	HLA-A*03:01, HLA-A*11:01, HLA-A*31:01, HLA-A*33:01, HLA-A*68:01	HLA-A*02:01, HLA-A*02:04, HLA-A*02:11, HLA-A*02:17, HLA-A*02:22	1	0	1	1	1	1	1	2	4	0.95852
EpI_NSP13_212	HLA-I	NSP13	294	303	GLALYYPSAR	10	Yes	NA	NA	NA	GLALYYPSAR	20764	HLA-A*03:01, HLA-A*11:01, HLA-A*31:01, HLA-A*33:01, HLA-A*68:01	HLA-A*31:01	1	0	0	1	0	0	1	1	1	0.398109
EpI_NSP13_213	HLA-I	NSP13	295	303	LALYYPSAR	9	Yes	NA	NA	NA	GLALYYPSAR	20764	HLA-A*03:01, HLA-A*11:01, HLA-A*31:01, HLA-A*33:01, HLA-A*68:01	HLA-A*31:01, HLA-A*68:01	1	0	0	2	1	1	1	1	1	0.715756
EpI_NSP13_214	HLA-I	NSP13	296	304	ALYYPSARI	9	No	NA	NA	NA	NA	NA	NA	HLA-A*02:01, HLA-A*02:04, HLA-A*02:11, HLA-A*02:22, HLA-B*15:04, HLA-C*01:02, HLA-C*03:04, HLA-C*15:03, HLA-C*16:01	1	0	3	1	4	1	2	3	6	1.56158
EpI_NSP13_215	HLA-I	NSP13	296	305	ALYYPSARIV	10	No	NA	NA	NA	NA	NA	NA	HLA-A*02:04, HLA-A*02:22	0	0	0	0	0	0	0	0	2	0.0952381
EpI_NSP13_216	HLA-I	NSP13	296	303	ALYYPSAR	8	Yes	NA	NA	NA	GLALYYPSAR	20764	HLA-A*03:01, HLA-A*11:01, HLA-A*31:01, HLA-A*33:01, HLA-A*68:01	HLA-A*03:01, HLA-A*31:01	2	0	1	2	1	1	1	1	1	0.818931
EpI_NSP13_217	HLA-I	NSP13	296	306	ALYYPSARIVY	11	Yes	NA	NA	NA	LYYPSARIVY, YYPSARIVY	40993, 76569	HLA-A*23:01, HLA-A*24:02, HLA-A*29:02, HLA-A*30:02, HLA-A*26:01	HLA-A*03:01, HLA-A*29:02, HLA-B*15:01, HLA-B*15:04	1	0	1	2	1	1	1	0	1	0.652264
EpI_NSP13_218	HLA-I	NSP13	297	304	LYYPSARI	8	Yes	NA	NA	NA	LYYPSARIVY	40993	HLA-A*23:01, HLA-A*24:02, HLA-A*29:02, HLA-A*30:02	HLA-A*23:01, HLA-A*24:02	1	0	2	1	1	1	0	1	1	0.627171
EpI_NSP13_219	HLA-I	NSP13	297	305	LYYPSARIV	9	Yes	NA	NA	NA	LYYPSARIVY	40993	HLA-A*23:01, HLA-A*24:02, HLA-A*29:02, HLA-A*30:02	HLA-A*23:01, HLA-A*24:02, HLA-C*06:02, HLA-C*07:01, HLA-C*07:02, HLA-C*12:03	5	0	5	4	4	1	0	2	2	1.50392
EpI_NSP13_220	HLA-I	NSP13	297	306	LYYPSARIVY	10	Yes	NA	NA	NA	LYYPSARIVY, YYPSARIVY	40993, 76569	HLA-A*23:01, HLA-A*24:02, HLA-A*29:02, HLA-A*30:02, HLA-A*26:01	HLA-A*29:02, HLA-C*07:01	1	0	1	2	1	0	0	0	0	0.279645
EpI_NSP13_221	HLA-I	NSP13	298	306	YYPSARIVY	9	Yes	NA	NA	NA	LYYPSARIVY, YYPSARIVY	40993, 76569	HLA-A*23:01, HLA-A*24:02, HLA-A*29:02, HLA-A*30:02, HLA-A*26:01	HLA-A*29:02, HLA-B*35:05, HLA-B*35:11, HLA-B*35:43, HLA-C*06:02, HLA-C*07:01, HLA-C*07:02, HLA-C*16:01	3	0	4	4	5	0	2	1	2	1.3429
EpI_NSP13_222	HLA-I	NSP13	299	306	YPSARIVY	8	Yes	NA	NA	NA	LYYPSARIVY, YYPSARIVY	40993, 76569	HLA-A*23:01, HLA-A*24:02, HLA-A*29:02, HLA-A*30:02, HLA-A*26:01	HLA-B*35:01, HLA-B*35:05, HLA-B*35:11, HLA-B*35:12, HLA-B*35:43	1	0	1	1	1	0	2	1	2	0.677171
EpI_NSP13_223	HLA-I	NSP13	299	307	YPSARIVYT	9	No	NA	NA	NA	NA	NA	NA	HLA-B*35:05, HLA-B*35:11, HLA-B*35:12, HLA-B*35:43	0	0	0	0	1	0	2	0	2	0.404062
EpI_NSP13_224	HLA-I	NSP13	299	308	YPSARIVYTA	10	No	NA	NA	NA	NA	NA	NA	HLA-B*35:12	0	0	0	0	0	0	0	0	1	0.047619
EpI_NSP13_225	HLA-I	NSP13	306	314	YTACSHAAV	9	No	NA	NA	NA	NA	NA	NA	HLA-A*02:11, HLA-A*02:22, HLA-A*68:02, HLA-C*01:02, HLA-C*03:04, HLA-C*15:03, HLA-C*16:01	0	0	2	0	3	0	1	2	5	0.857026
EpI_NSP13_226	HLA-I	NSP13	309	317	CSHAAVDAL	9	No	NA	NA	NA	NA	NA	NA	HLA-C*03:04	0	0	1	0	1	0	0	1	1	0.265173
EpI_NSP13_227	HLA-I	NSP13	310	317	SHAAVDAL	8	No	NA	NA	NA	NA	NA	NA	HLA-B*39:05, HLA-B*39:09	0	0	0	1	0	0	0	0	2	0.154062
EpI_NSP13_228	HLA-I	NSP13	310	318	SHAAVDALC	9	No	NA	NA	NA	NA	NA	NA	HLA-B*39:05, HLA-B*39:09	0	0	0	1	0	0	0	0	2	0.154062
EpI_NSP13_229	HLA-I	NSP13	311	320	HAAVDALCEK	10	No	NA	NA	NA	NA	NA	NA	HLA-A*68:01	0	0	0	1	1	1	0	0	0	0.317647
EpI_NSP13_230	HLA-I	NSP13	312	320	AAVDALCEK	9	No	NA	NA	NA	NA	NA	NA	HLA-A*11:01, HLA-A*68:01	1	0	1	1	1	1	0	0	0	0.420822
EpI_NSP13_231	HLA-I	NSP13	313	323	AVDALCEKALK	11	No	NA	NA	NA	NA	NA	NA	HLA-A*11:01	1	0	1	0	0	0	0	0	0	0.103175
EpI_NSP13_232	HLA-I	NSP13	315	323	DALCEKALK	9	No	NA	NA	NA	NA	NA	NA	HLA-A*68:01	0	0	0	1	1	1	0	0	0	0.317647
EpI_NSP13_233	HLA-I	NSP13	315	324	DALCEKALKY	10	Yes	NA	NA	NA	ALCEKALKY	2455	HLA-A*03:01, HLA-A*11:01	HLA-B*35:05, HLA-B*35:11, HLA-B*35:43	0	0	0	0	1	0	2	0	1	0.356443
EpI_NSP13_234	HLA-I	NSP13	316	325	ALCEKALKYL	10	Yes	NA	NA	NA	ALCEKALKY	2455	HLA-A*03:01, HLA-A*11:01	HLA-A*02:11, HLA-A*02:22	0	0	0	0	0	0	1	1	1	0.28373
EpI_NSP13_235	HLA-I	NSP13	316	324	ALCEKALKY	9	Yes	NA	NA	NA	ALCEKALKY	2455	HLA-A*03:01, HLA-A*11:01	HLA-A*03:01, HLA-A*29:02, HLA-B*15:01, HLA-B*15:04	1	0	1	2	1	1	1	0	1	0.652264
EpI_NSP13_236	HLA-I	NSP13	320	329	KALKYLPIDK	10	Yes	NA	NA	NA	ALKYLPIDK	2679	HLA-A*03:01, HLA-A*11:01, HLA-A*68:01	HLA-A*03:01, HLA-A*11:01	2	0	2	1	1	1	0	0	0	0.523996
EpI_NSP13_237	HLA-I	NSP13	321	329	ALKYLPIDK	9	Yes	NA	NA	NA	ALKYLPIDK	2679	HLA-A*03:01, HLA-A*11:01, HLA-A*68:01	HLA-A*03:01, HLA-A*11:01	2	0	2	1	1	1	0	0	0	0.523996
EpI_NSP13_238	HLA-I	NSP13	323	333	KYLPIDKCSRI	11	Yes	NA	NA	NA	LPIDKCSRI	38530	HLA-B*07:02, HLA-A*08:01, HLA-A*51:01, HLA-A*53:01, HLA-A*54:01	HLA-A*23:01, HLA-A*24:02	1	0	2	1	1	1	0	1	1	0.627171
EpI_NSP13_239	HLA-I	NSP13	323	332	KYLPIDKCSR	10	No	NA	NA	NA	NA	NA	NA	HLA-A*31:01	1	0	0	1	0	0	1	1	1	0.398109
EpI_NSP13_240	HLA-I	NSP13	324	333	YLPIDKCSRI	10	Yes	NA	NA	NA	LPIDKCSRI	38530	HLA-B*07:02, HLA-A*08:01, HLA-A*51:01, HLA-A*53:01, HLA-A*54:01	HLA-A*02:04, HLA-A*02:11, HLA-A*02:22	0	0	0	0	0	0	1	1	2	0.331349
EpI_NSP13_241	HLA-I	NSP13	324	332	YLPIDKCSR	9	No	NA	NA	NA	NA	NA	NA	HLA-A*68:01	0	0	0	1	1	1	0	0	0	0.317647
EpI_NSP13_242	HLA-I	NSP13	325	333	LPIDKCSRI	9	Yes	NA	NA	NA	LPIDKCSRI, LPIDKCSRII	38530, 38531	HLA-B*07:02, HLA-A*08:01, HLA-A*51:01, HLA-A*53:01, HLA-A*54:01, HLA-A*35:01	HLA-B*35:05, HLA-B*35:11, HLA-B*35:12, HLA-B*35:43, HLA-B*51:01	1	0	1	1	2	0	2	1	2	0.735994
EpI_NSP13_243	HLA-I	NSP13	325	334	LPIDKCSRII	10	Yes	NA	NA	NA	LPIDKCSRI, LPIDKCSRII	38530, 38531	HLA-B*07:02, HLA-A*08:01, HLA-A*51:01, HLA-A*53:01, HLA-A*54:01, HLA-A*35:01	HLA-B*35:12	0	0	0	0	0	0	0	0	1	0.047619
EpI_NSP13_244	HLA-I	NSP13	329	337	KCSRIIPAR	9	No	NA	NA	NA	NA	NA	NA	HLA-A*31:01	1	0	0	1	0	0	1	1	1	0.398109
EpI_NSP13_245	HLA-I	NSP13	331	340	SRIIPARARV	10	No	NA	NA	NA	NA	NA	NA	HLA-C*07:01	1	0	1	1	1	0	0	0	0	0.220822
EpI_NSP13_246	HLA-I	NSP13	332	340	RIIPARARV	9	No	NA	NA	NA	NA	NA	NA	HLA-A*02:04, HLA-A*02:22, HLA-A*68:02, HLA-B*15:04, HLA-C*01:02, HLA-C*03:04, HLA-C*07:01, HLA-C*15:03, HLA-C*16:01	1	0	3	1	4	0	1	1	6	1.01436
EpI_NSP13_247	HLA-I	NSP13	332	339	RIIPARAR	8	No	NA	NA	NA	NA	NA	NA	HLA-A*31:01	1	0	0	1	0	0	1	1	1	0.398109
EpI_NSP13_248	HLA-I	NSP13	334	342	IPARARVEC	9	No	NA	NA	NA	NA	NA	NA	HLA-B*07:02	1	0	1	1	0	0	0	0	0	0.161998
EpI_NSP13_249	HLA-I	NSP13	334	343	IPARARVECF	10	No	NA	NA	NA	NA	NA	NA	HLA-B*07:02, HLA-B*35:05, HLA-B*35:11, HLA-B*35:12, HLA-B*35:43	1	0	1	1	1	0	2	0	2	0.56606
EpI_NSP13_250	HLA-I	NSP13	338	346	ARVECFDKF	9	No	NA	NA	NA	NA	NA	NA	HLA-C*07:01	1	0	1	1	1	0	0	0	0	0.220822
EpI_NSP13_251	HLA-I	NSP13	339	347	RVECFDKFK	9	No	NA	NA	NA	NA	NA	NA	HLA-A*11:01	1	0	1	0	0	0	0	0	0	0.103175
EpI_NSP13_252	HLA-I	NSP13	343	352	FDKFKVNSTL	10	No	NA	NA	NA	NA	NA	NA	HLA-B*39:05, HLA-B*39:09	0	0	0	1	0	0	0	0	2	0.154062
EpI_NSP13_253	HLA-I	NSP13	344	352	DKFKVNSTL	9	No	NA	NA	NA	NA	NA	NA	HLA-B*39:05, HLA-B*39:09	0	0	0	1	0	0	0	0	2	0.154062
EpI_NSP13_254	HLA-I	NSP13	347	355	KVNSTLEQY	9	Yes	NA	NA	NA	KVNSTLEQY	34144	HLA-A*03:01, HLA-A*11:01, HLA-A*31:01, HLA-A*68:01	HLA-B*15:01, HLA-B*15:04, HLA-B*35:05, HLA-B*35:11, HLA-B*35:43, HLA-C*16:01	0	0	1	0	2	0	3	0	2	0.635504
EpI_NSP13_255	HLA-I	NSP13	349	357	NSTLEQYVF	9	No	NA	NA	NA	NA	NA	NA	HLA-B*35:05, HLA-B*35:11, HLA-B*35:43	0	0	0	0	1	0	2	0	1	0.356443
EpI_NSP13_256	HLA-I	NSP13	352	360	LEQYVFCTV	9	No	NA	NA	NA	NA	NA	NA	HLA-B*40:02	0	0	0	0	1	1	0	0	1	0.306443
EpI_NSP13_257	HLA-I	NSP13	355	363	YVFCTVNAL	9	Yes	NA	NA	NA	YVFCTVNAL	76266	HLA-A*02:01, HLA-A*02:02, HLA-A*02:03, HLA-A*02:06, HLA-A*68:02	HLA-A*02:01, HLA-A*02:04, HLA-A*02:11, HLA-A*02:17, HLA-A*02:22, HLA-A*68:02, HLA-B*35:01, HLA-B*35:05, HLA-B*35:11, HLA-B*35:12, HLA-B*35:43, HLA-B*39:05, HLA-B*39:09, HLA-C*01:02, HLA-C*03:03, HLA-C*03:04, HLA-C*06:02, HLA-C*07:01, HLA-C*07:02, HLA-C*12:03, HLA-C*15:02, HLA-C*15:03, HLA-C*16:01	6	0	9	6	8	1	3	5	13	3.33504
EpI_NSP13_258	HLA-I	NSP13	359	368	TVNALPETTA	10	No	NA	NA	NA	NA	NA	NA	HLA-A*68:02	0	0	0	0	0	0	0	0	1	0.047619
EpI_NSP13_259	HLA-I	NSP13	362	372	ALPETTADIVV	11	No	NA	NA	NA	NA	NA	NA	HLA-A*02:01, HLA-A*02:22	1	0	1	1	1	1	0	1	2	0.627171
EpI_NSP13_260	HLA-I	NSP13	362	370	ALPETTADI	9	No	NA	NA	NA	NA	NA	NA	HLA-A*02:04, HLA-A*02:11, HLA-A*02:22, HLA-C*01:02	0	0	0	0	1	0	1	1	3	0.437792
EpI_NSP13_261	HLA-I	NSP13	362	371	ALPETTADIV	10	No	NA	NA	NA	NA	NA	NA	HLA-A*02:22	0	0	0	0	0	0	0	0	1	0.047619
EpI_NSP13_262	HLA-I	NSP13	363	373	LPETTADIVVF	11	No	NA	NA	NA	NA	NA	NA	HLA-B*35:01, HLA-B*35:05, HLA-B*35:12	1	0	1	1	0	0	1	1	1	0.445728
EpI_NSP13_263	HLA-I	NSP13	363	371	LPETTADIV	9	No	NA	NA	NA	NA	NA	NA	HLA-B*35:12	0	0	0	0	0	0	0	0	1	0.047619
EpI_NSP13_264	HLA-I	NSP13	363	372	LPETTADIVV	10	No	NA	NA	NA	NA	NA	NA	HLA-B*35:12	0	0	0	0	0	0	0	0	1	0.047619
EpI_NSP13_265	HLA-I	NSP13	365	373	ETTADIVVF	9	No	NA	NA	NA	NA	NA	NA	HLA-B*35:05, HLA-B*35:11, HLA-B*35:12, HLA-B*35:43	0	0	0	0	1	0	2	0	2	0.404062
EpI_NSP13_266	HLA-I	NSP13	366	375	TTADIVVFDE	10	No	NA	NA	NA	NA	NA	NA	HLA-A*68:01	0	0	0	1	1	1	0	0	0	0.317647
EpI_NSP13_267	HLA-I	NSP13	366	376	TTADIVVFDEI	11	No	NA	NA	NA	NA	NA	NA	HLA-A*68:02	0	0	0	0	0	0	0	0	1	0.047619
EpI_NSP13_268	HLA-I	NSP13	366	373	TTADIVVF	8	No	NA	NA	NA	NA	NA	NA	HLA-B*35:05, HLA-B*35:43	0	0	0	0	1	0	1	0	1	0.231443
EpI_NSP13_269	HLA-I	NSP13	370	378	IVVFDEISM	9	No	NA	NA	NA	NA	NA	NA	HLA-B*15:04, HLA-B*35:05, HLA-B*35:11, HLA-B*35:12, HLA-B*35:43, HLA-C*01:02, HLA-C*03:04, HLA-C*16:01	0	0	2	0	4	0	3	1	4	1.00712
EpI_NSP13_270	HLA-I	NSP13	371	379	VVFDEISMA	9	No	NA	NA	NA	NA	NA	NA	HLA-A*02:01, HLA-A*02:04, HLA-A*02:11, HLA-A*02:22, HLA-B*15:04, HLA-C*03:04, HLA-C*15:03	1	0	2	1	2	1	2	3	5	1.34869
EpI_NSP13_271	HLA-I	NSP13	371	378	VVFDEISM	8	No	NA	NA	NA	NA	NA	NA	HLA-B*35:05, HLA-B*35:11, HLA-B*35:43, HLA-C*01:02, HLA-C*03:04, HLA-C*15:03, HLA-C*16:01	0	0	2	0	4	0	2	1	4	0.88212
EpI_NSP13_272	HLA-I	NSP13	372	382	VFDEISMATNY	11	Yes	NA	NA	NA	FDEISMATNY	15373	HLA-A*26:01, HLA-A*29:02, HLA-A*30:02	HLA-A*29:02	0	0	0	1	0	0	0	0	0	0.0588235
EpI_NSP13_273	HLA-I	NSP13	372	380	VFDEISMAT	9	No	NA	NA	NA	NA	NA	NA	HLA-C*04:01	1	0	1	1	1	0	0	1	1	0.379552
EpI_NSP13_274	HLA-I	NSP13	374	381	DEISMATN	8	Yes	NA	NA	NA	FDEISMATNY	15373	HLA-A*26:01, HLA-A*29:02, HLA-A*30:02	HLA-B*18:01	1	0	0	1	0	0	0	0	0	0.114379
EpI_NSP13_275	HLA-I	NSP13	374	382	DEISMATNY	9	Yes	NA	NA	NA	FDEISMATNY	15373	HLA-A*26:01, HLA-A*29:02, HLA-A*30:02	HLA-B*18:01, HLA-B*35:43, HLA-B*44:03	2	0	1	1	2	0	0	0	1	0.38282
EpI_NSP13_276	HLA-I	NSP13	374	384	DEISMATNYDL	11	No	NA	NA	NA	NA	NA	NA	HLA-B*18:01	1	0	0	1	0	0	0	0	0	0.114379
EpI_NSP13_277	HLA-I	NSP13	375	384	EISMATNYDL	10	No	NA	NA	NA	NA	NA	NA	HLA-A*68:02	0	0	0	0	0	0	0	0	1	0.047619
EpI_NSP13_278	HLA-I	NSP13	376	384	ISMATNYDL	9	No	NA	NA	NA	NA	NA	NA	HLA-C*01:02, HLA-C*03:04, HLA-C*15:03, HLA-C*16:01	0	0	2	0	3	0	0	1	3	0.525677
EpI_NSP13_279	HLA-I	NSP13	377	386	SMATNYDLSV	10	No	NA	NA	NA	NA	NA	NA	HLA-A*02:01, HLA-A*02:04, HLA-A*02:11, HLA-A*02:17, HLA-A*02:22	1	0	1	1	1	1	1	2	4	0.95852
EpI_NSP13_280	HLA-I	NSP13	378	386	MATNYDLSV	9	No	NA	NA	NA	NA	NA	NA	HLA-A*68:02, HLA-B*35:05, HLA-B*35:11, HLA-B*35:12, HLA-C*01:02, HLA-C*03:04, HLA-C*12:03, HLA-C*15:02, HLA-C*15:03, HLA-C*16:01	1	0	3	0	3	0	2	1	5	0.97409
EpI_NSP13_281	HLA-I	NSP13	378	387	MATNYDLSVV	10	No	NA	NA	NA	NA	NA	NA	HLA-A*68:02	0	0	0	0	0	0	0	0	1	0.047619
EpI_NSP13_282	HLA-I	NSP13	379	387	ATNYDLSVV	9	No	NA	NA	NA	NA	NA	NA	HLA-A*68:02, HLA-C*15:03	0	0	0	0	0	0	0	0	2	0.0952381
EpI_NSP13_283	HLA-I	NSP13	382	391	YDLSVVNARL	10	No	NA	NA	NA	NA	NA	NA	HLA-A*02:04, HLA-A*02:22	0	0	0	0	0	0	0	0	2	0.0952381
EpI_NSP13_284	HLA-I	NSP13	383	392	DLSVVNARLR	10	No	NA	NA	NA	NA	NA	NA	HLA-A*68:01	0	0	0	1	1	1	0	0	0	0.317647
EpI_NSP13_285	HLA-I	NSP13	384	392	LSVVNARLR	9	No	NA	NA	NA	NA	NA	NA	HLA-A*31:01, HLA-A*68:01	1	0	0	2	1	1	1	1	1	0.715756
EpI_NSP13_286	HLA-I	NSP13	385	394	SVVNARLRAK	10	Yes	NA	NA	NA	SVVNARLRAK, VVNARLRAK	62385, 71767	HLA-A*03:01, HLA-A*11:01, HLA-A*31:01, HLA-A*68:01	HLA-A*03:01, HLA-A*11:01, HLA-A*68:01	2	0	2	2	2	2	0	0	0	0.841643
EpI_NSP13_287	HLA-I	NSP13	385	392	SVVNARLR	8	Yes	NA	NA	NA	SVVNARLRAK	62385	HLA-A*03:01, HLA-A*11:01, HLA-A*31:01, HLA-A*68:01	HLA-A*31:01	1	0	0	1	0	0	1	1	1	0.398109
EpI_NSP13_288	HLA-I	NSP13	385	393	SVVNARLRA	9	Yes	NA	NA	NA	SVVNARLRAK	62385	HLA-A*03:01, HLA-A*11:01, HLA-A*31:01, HLA-A*68:01	HLA-A*68:02, HLA-B*15:04	0	0	0	0	0	0	1	0	1	0.172619
EpI_NSP13_289	HLA-I	NSP13	386	394	VVNARLRAK	9	Yes	NA	NA	NA	SVVNARLRAK, VVNARLRAK	62385, 71767	HLA-A*03:01, HLA-A*11:01, HLA-A*31:01, HLA-A*68:01	HLA-A*03:01, HLA-A*11:01, HLA-A*31:01	3	0	2	2	1	1	1	1	1	0.922106
EpI_NSP13_290	HLA-I	NSP13	388	396	NARLRAKHY	9	No	NA	NA	NA	NA	NA	NA	HLA-B*35:05, HLA-B*35:11, HLA-B*35:43	0	0	0	0	1	0	2	0	1	0.356443
EpI_NSP13_291	HLA-I	NSP13	389	397	ARLRAKHYV	9	No	NA	NA	NA	NA	NA	NA	HLA-C*07:01	1	0	1	1	1	0	0	0	0	0.220822
EpI_NSP13_292	HLA-I	NSP13	389	398	ARLRAKHYVY	10	No	NA	NA	NA	NA	NA	NA	HLA-C*07:01	1	0	1	1	1	0	0	0	0	0.220822
EpI_NSP13_293	HLA-I	NSP13	390	398	RLRAKHYVY	9	No	NA	NA	NA	NA	NA	NA	HLA-A*03:01, HLA-A*29:02, HLA-A*31:01, HLA-B*08:01, HLA-B*15:01, HLA-B*15:04, HLA-B*35:11, HLA-B*35:43, HLA-C*07:01, HLA-C*16:01	4	0	4	4	4	1	3	1	3	1.71225
EpI_NSP13_294	HLA-I	NSP13	390	399	RLRAKHYVYI	10	No	NA	NA	NA	NA	NA	NA	HLA-C*07:01	1	0	1	1	1	0	0	0	0	0.220822
EpI_NSP13_295	HLA-I	NSP13	391	399	LRAKHYVYI	9	No	NA	NA	NA	NA	NA	NA	HLA-B*39:05, HLA-B*39:09, HLA-C*07:01	1	0	1	2	1	0	0	0	2	0.374883
EpI_NSP13_296	HLA-I	NSP13	391	398	LRAKHYVY	8	No	NA	NA	NA	NA	NA	NA	HLA-C*07:01	1	0	1	1	1	0	0	0	0	0.220822
EpI_NSP13_297	HLA-I	NSP13	395	405	HYVYIGDPAQL	11	Yes	NA	NA	NA	VYIGDPAQL	72048	HLA-A*23:01, HLA-A*24:02	HLA-A*24:02	1	0	1	1	1	1	0	1	1	0.579552
EpI_NSP13_298	HLA-I	NSP13	396	405	YVYIGDPAQL	10	Yes	NA	NA	NA	VYIGDPAQL	72048	HLA-A*23:01, HLA-A*24:02	HLA-A*02:01, HLA-A*02:04, HLA-A*02:11, HLA-A*02:22, HLA-B*15:04, HLA-B*35:12, HLA-B*35:43, HLA-B*39:09, HLA-C*01:02, HLA-C*03:04, HLA-C*07:01, HLA-C*15:03, HLA-C*16:01	2	0	4	3	6	1	2	3	9	2.0429
EpI_NSP13_299	HLA-I	NSP13	396	404	YVYIGDPAQ	9	No	NA	NA	NA	NA	NA	NA	HLA-B*35:05	0	0	0	0	0	0	1	0	0	0.125
EpI_NSP13_300	HLA-I	NSP13	397	405	VYIGDPAQL	9	Yes	NA	NA	NA	VYIGDPAQL	72048	HLA-A*23:01, HLA-A*24:02	HLA-A*23:01, HLA-A*24:02, HLA-B*39:05, HLA-B*39:09, HLA-C*01:02, HLA-C*03:04, HLA-C*06:02, HLA-C*07:01, HLA-C*07:02, HLA-C*16:01	4	0	7	5	7	1	0	3	6	2.08049
EpI_NSP13_301	HLA-I	NSP13	398	405	YIGDPAQL	8	Yes	NA	NA	NA	VYIGDPAQL	72048	HLA-A*23:01, HLA-A*24:02	HLA-C*01:02, HLA-C*05:01	1	0	1	1	2	0	0	0	1	0.327264
EpI_NSP13_302	HLA-I	NSP13	401	411	DPAQLPAPRTL	11	No	NA	NA	NA	NA	NA	NA	HLA-B*35:12, HLA-B*39:05	0	0	0	0	0	0	0	0	2	0.0952381
EpI_NSP13_303	HLA-I	NSP13	403	411	AQLPAPRTL	9	No	NA	NA	NA	NA	NA	NA	HLA-A*02:04, HLA-B*15:01, HLA-B*15:04, HLA-B*35:12, HLA-B*39:05, HLA-B*39:09, HLA-C*01:02, HLA-C*03:04, HLA-C*07:01, HLA-C*15:03, HLA-C*16:01	1	0	3	2	4	0	1	1	8	1.16842
EpI_NSP13_304	HLA-I	NSP13	403	412	AQLPAPRTLL	10	No	NA	NA	NA	NA	NA	NA	HLA-B*15:01, HLA-B*15:04, HLA-B*39:05, HLA-B*39:09	0	0	0	1	0	0	1	0	3	0.326681
EpI_NSP13_305	HLA-I	NSP13	404	414	QLPAPRTLLTK	11	No	NA	NA	NA	NA	NA	NA	HLA-A*03:01	1	0	1	1	1	1	0	0	0	0.420822
EpI_NSP13_306	HLA-I	NSP13	404	412	QLPAPRTLL	9	No	NA	NA	NA	NA	NA	NA	HLA-C*01:02, HLA-C*03:04, HLA-C*07:01, HLA-C*15:03, HLA-C*16:01	1	0	3	1	4	0	0	1	3	0.746499
EpI_NSP13_307	HLA-I	NSP13	405	412	LPAPRTLL	8	No	NA	NA	NA	NA	NA	NA	HLA-B*07:02, HLA-B*08:01, HLA-B*35:05, HLA-B*35:11, HLA-B*35:12, HLA-B*35:43	2	0	2	1	1	0	2	0	2	0.669234
EpI_NSP13_308	HLA-I	NSP13	405	413	LPAPRTLLT	9	No	NA	NA	NA	NA	NA	NA	HLA-B*07:02, HLA-B*35:05, HLA-B*35:11, HLA-B*35:12, HLA-B*35:43	1	0	1	1	1	0	2	0	2	0.56606
EpI_NSP13_309	HLA-I	NSP13	407	417	APRTLLTKGTL	11	No	NA	NA	NA	NA	NA	NA	HLA-B*07:02	1	0	1	1	0	0	0	0	0	0.161998
EpI_NSP13_310	HLA-I	NSP13	409	417	RTLLTKGTL	9	No	NA	NA	NA	NA	NA	NA	HLA-B*15:04, HLA-C*01:02, HLA-C*03:04, HLA-C*15:03, HLA-C*16:01	0	0	2	0	3	0	1	1	3	0.650677
EpI_NSP13_311	HLA-I	NSP13	412	421	LTKGTLEPEY	10	Yes	NA	NA	NA	LTKGTLEPEY	39992	HLA-A*01:01, HLA-A*26:01, HLA-A*29:02, HLA-A*30:02	HLA-A*29:02, HLA-B*15:01	0	0	0	1	0	0	0	0	1	0.106443
EpI_NSP13_312	HLA-I	NSP13	416	425	TLEPEYFNSV	10	No	NA	NA	NA	NA	NA	NA	HLA-A*02:01, HLA-A*02:04, HLA-A*02:11, HLA-A*02:17, HLA-A*02:22	1	0	1	1	1	1	1	2	4	0.95852
EpI_NSP13_313	HLA-I	NSP13	417	425	LEPEYFNSV	9	No	NA	NA	NA	NA	NA	NA	HLA-B*39:05, HLA-B*39:09	0	0	0	1	0	0	0	0	2	0.154062
EpI_NSP13_314	HLA-I	NSP13	420	428	EYFNSVCRL	9	Yes	NA	NA	NA	PEYFNSVCRL	47470	HLA-B*40:01, HLA-B*40:02	HLA-A*24:02, HLA-B*39:09, HLA-C*04:01, HLA-C*06:02, HLA-C*07:01, HLA-C*07:02	5	0	5	6	5	1	0	3	4	1.88674
EpI_NSP13_315	HLA-I	NSP13	420	429	EYFNSVCRLM	10	No	NA	NA	NA	NA	NA	NA	HLA-A*24:02	1	0	1	1	1	1	0	1	1	0.579552
EpI_NSP13_316	HLA-I	NSP13	421	429	YFNSVCRLM	9	No	NA	NA	NA	NA	NA	NA	HLA-A*23:01, HLA-A*29:02, HLA-C*04:01, HLA-C*06:02, HLA-C*07:01, HLA-C*07:02	4	0	5	5	4	0	0	2	2	1.30719
EpI_NSP13_317	HLA-I	NSP13	421	430	YFNSVCRLMK	10	No	NA	NA	NA	NA	NA	NA	HLA-A*31:01	1	0	0	1	0	0	1	1	1	0.398109
EpI_NSP13_318	HLA-I	NSP13	427	436	RLMKTIGPDM	10	No	NA	NA	NA	NA	NA	NA	HLA-B*15:04	0	0	0	0	0	0	1	0	0	0.125
EpI_NSP13_319	HLA-I	NSP13	428	436	LMKTIGPDM	9	No	NA	NA	NA	NA	NA	NA	HLA-B*15:01, HLA-B*15:04	0	0	0	0	0	0	1	0	1	0.172619
EpI_NSP13_320	HLA-I	NSP13	428	437	LMKTIGPDMF	10	No	NA	NA	NA	NA	NA	NA	HLA-B*15:01, HLA-B*15:04	0	0	0	0	0	0	1	0	1	0.172619
EpI_NSP13_321	HLA-I	NSP13	429	437	MKTIGPDMF	9	No	NA	NA	NA	NA	NA	NA	HLA-B*39:05, HLA-B*39:09	0	0	0	1	0	0	0	0	2	0.154062
EpI_NSP13_322	HLA-I	NSP13	429	438	MKTIGPDMFL	10	No	NA	NA	NA	NA	NA	NA	HLA-C*15:03	0	0	0	0	0	0	0	0	1	0.047619
EpI_NSP13_323	HLA-I	NSP13	430	438	KTIGPDMFL	9	No	NA	NA	NA	NA	NA	NA	HLA-A*02:04, HLA-A*02:11, HLA-A*02:22, HLA-A*68:02, HLA-B*15:04, HLA-C*01:02, HLA-C*03:04, HLA-C*05:01, HLA-C*07:01, HLA-C*15:02, HLA-C*15:03, HLA-C*16:01	2	0	5	2	5	0	2	2	6	1.51891
EpI_NSP13_324	HLA-I	NSP13	435	443	DMFLGTCRR	9	No	NA	NA	NA	NA	NA	NA	HLA-A*68:01	0	0	0	1	1	1	0	0	0	0.317647
EpI_NSP13_325	HLA-I	NSP13	443	452	RCPAEIVDTV	10	Yes	NA	NA	NA	CPAEIVDTV	6744	HLA-B*07:02, HLA-A*08:01, HLA-A*51:01, HLA-A*53:01, HLA-A*54:01	HLA-B*35:12	0	0	0	0	0	0	0	0	1	0.047619
EpI_NSP13_326	HLA-I	NSP13	444	452	CPAEIVDTV	9	Yes	NA	NA	NA	CPAEIVDTV	6744	HLA-B*07:02, HLA-A*08:01, HLA-A*51:01, HLA-A*53:01, HLA-A*54:01	HLA-A*68:02, HLA-B*35:01, HLA-B*35:05, HLA-B*35:11, HLA-B*35:12, HLA-B*51:01	2	0	2	2	1	0	2	2	2	0.95028
EpI_NSP13_327	HLA-I	NSP13	445	452	PAEIVDTV	8	Yes	NA	NA	NA	CPAEIVDTV	6744	HLA-B*07:02, HLA-A*08:01, HLA-A*51:01, HLA-A*53:01, HLA-A*54:01	HLA-B*35:12	0	0	0	0	0	0	0	0	1	0.047619
EpI_NSP13_328	HLA-I	NSP13	446	455	AEIVDTVSAL	10	Yes	NA	NA	NA	AEIVDTVSA, AEIVDTVSAL	1004, 1005	HLA-B*40:01, HLA-B*40:02, HLA-B*44:02, HLA-B*44:03, HLA-B*45:01	HLA-A*02:22, HLA-B*39:05, HLA-B*39:09, HLA-B*40:02, HLA-B*44:03	1	0	1	1	2	1	0	0	4	0.670121
EpI_NSP13_329	HLA-I	NSP13	446	454	AEIVDTVSA	9	Yes	NA	NA	NA	AEIVDTVSA, AEIVDTVSAL	1004, 1005	HLA-B*40:01, HLA-B*40:02, HLA-B*44:02, HLA-B*44:03, HLA-B*45:01	HLA-B*40:02	0	0	0	0	1	1	0	0	1	0.306443
EpI_NSP13_330	HLA-I	NSP13	447	455	EIVDTVSAL	9	Yes	NA	NA	NA	AEIVDTVSAL	1005	HLA-B*40:01, HLA-B*40:02, HLA-B*44:02, HLA-B*44:03, HLA-B*45:01	HLA-A*68:02, HLA-B*15:04, HLA-B*35:05, HLA-B*35:11, HLA-B*35:12, HLA-B*35:43, HLA-B*39:05, HLA-B*39:09, HLA-C*01:02, HLA-C*03:04, HLA-C*15:03, HLA-C*16:01	0	0	2	1	4	0	3	1	8	1.25642
EpI_NSP13_331	HLA-I	NSP13	447	456	EIVDTVSALV	10	Yes	NA	NA	NA	IVDTVSALV	29237	HLA-A*02:01, HLA-A*02:02, HLA-A*02:03, HLA-A*02:06, HLA-A*68:02	HLA-A*68:02	0	0	0	0	0	0	0	0	1	0.047619
EpI_NSP13_332	HLA-I	NSP13	447	457	EIVDTVSALVY	11	Yes	NA	NA	NA	IVDTVSALV, IVDTVSALVY	29237, 29238	HLA-A*02:01, HLA-A*02:02, HLA-A*02:03, HLA-A*02:06, HLA-A*68:02, HLA-A*01:01, HLA-A*29:02	HLA-B*35:43	0	0	0	0	1	0	0	0	1	0.106443
EpI_NSP13_333	HLA-I	NSP13	448	457	IVDTVSALVY	10	Yes	NA	NA	NA	IVDTVSALV, IVDTVSALVY	29237, 29238	HLA-A*02:01, HLA-A*02:02, HLA-A*02:03, HLA-A*02:06, HLA-A*68:02, HLA-A*01:01, HLA-A*29:02	HLA-A*01:01, HLA-A*29:02, HLA-B*35:05, HLA-B*35:11, HLA-B*35:43	1	0	1	2	2	0	2	0	1	0.636088
EpI_NSP13_334	HLA-I	NSP13	448	456	IVDTVSALV	9	Yes	NA	NA	NA	IVDTVSALV, IVDTVSALVY	29237, 29238	HLA-A*02:01, HLA-A*02:02, HLA-A*02:03, HLA-A*02:06, HLA-A*68:02, HLA-A*01:01, HLA-A*29:02	HLA-A*02:01, HLA-A*02:04, HLA-A*02:11, HLA-A*02:17, HLA-A*02:22, HLA-A*68:02, HLA-C*01:02, HLA-C*03:04, HLA-C*04:01, HLA-C*05:01, HLA-C*15:02, HLA-C*15:03	3	0	5	3	5	1	1	4	9	2.07337
EpI_NSP13_335	HLA-I	NSP13	448	455	IVDTVSAL	8	Yes	NA	NA	NA	AEIVDTVSAL, IVDTVSALV, IVDTVSALVY	1005, 29237, 29238	HLA-A*40:01, HLA-A*40:02, HLA-A*44:02, HLA-A*44:03, HLA-A*45:01, HLA-A*02:01, HLA-A*02:02, HLA-A*02:03, HLA-A*02:06, HLA-A*68:02, HLA-A*01:01, HLA-A*29:02	HLA-C*01:02, HLA-C*03:04, HLA-C*04:01, HLA-C*05:01, HLA-C*15:03, HLA-C*16:01	2	0	4	2	5	0	0	2	4	1.12605
EpI_NSP13_336	HLA-I	NSP13	450	460	DTVSALVYDNK	11	Yes	NA	NA	NA	TVSALVYDNK	67140	HLA-A*03:01, HLA-A*11:01, HLA-A*31:01, HLA-A*68:01	HLA-A*68:01	0	0	0	1	1	1	0	0	0	0.317647
EpI_NSP13_337	HLA-I	NSP13	450	457	DTVSALVY	8	Yes	NA	NA	NA	IVDTVSALVY	29238	HLA-A*01:01, HLA-A*29:02	HLA-B*35:05, HLA-B*35:11, HLA-B*35:43	0	0	0	0	1	0	2	0	1	0.356443
EpI_NSP13_338	HLA-I	NSP13	451	460	TVSALVYDNK	10	Yes	NA	NA	NA	TVSALVYDNK	67140	HLA-A*03:01, HLA-A*11:01, HLA-A*31:01, HLA-A*68:01	HLA-A*03:01, HLA-A*11:01, HLA-A*68:01	2	0	2	2	2	2	0	0	0	0.841643
EpI_NSP13_339	HLA-I	NSP13	452	460	VSALVYDNK	9	Yes	NA	NA	NA	TVSALVYDNK	67140	HLA-A*03:01, HLA-A*11:01, HLA-A*31:01, HLA-A*68:01	HLA-A*11:01, HLA-A*68:01	1	0	1	1	1	1	0	0	0	0.420822
EpI_NSP13_340	HLA-I	NSP13	453	461	SALVYDNKL	9	No	NA	NA	NA	NA	NA	NA	HLA-B*35:05, HLA-B*35:12, HLA-C*01:02, HLA-C*03:04, HLA-C*15:03, HLA-C*16:01	0	0	2	0	3	0	1	1	4	0.698296
EpI_NSP13_341	HLA-I	NSP13	454	463	ALVYDNKLKA	10	Yes	NA	NA	NA	ALVYDNKLK	2994	HLA-A*03:01, HLA-A*11:01	HLA-A*02:04, HLA-A*02:22	0	0	0	0	0	0	0	0	2	0.0952381
EpI_NSP13_342	HLA-I	NSP13	454	462	ALVYDNKLK	9	Yes	NA	NA	NA	ALVYDNKLK	2994	HLA-A*03:01, HLA-A*11:01	HLA-A*03:01, HLA-A*11:01	2	0	2	1	1	1	0	0	0	0.523996
EpI_NSP13_343	HLA-I	NSP13	455	462	LVYDNKLK	8	Yes	NA	NA	NA	ALVYDNKLK	2994	HLA-A*03:01, HLA-A*11:01	HLA-A*03:01	1	0	1	1	1	1	0	0	0	0.420822
EpI_NSP13_344	HLA-I	NSP13	455	465	LVYDNKLKAHK	11	No	NA	NA	NA	NA	NA	NA	HLA-A*03:01, HLA-A*11:01	2	0	2	1	1	1	0	0	0	0.523996
EpI_NSP13_345	HLA-I	NSP13	455	463	LVYDNKLKA	9	No	NA	NA	NA	NA	NA	NA	HLA-B*15:04, HLA-C*03:04, HLA-C*15:03	0	0	1	0	1	0	1	1	2	0.437792
EpI_NSP13_346	HLA-I	NSP13	464	472	HKDKSAQCF	9	No	NA	NA	NA	NA	NA	NA	HLA-B*39:05	0	0	0	0	0	0	0	0	1	0.047619
EpI_NSP13_347	HLA-I	NSP13	467	476	KSAQCFKMFY	10	Yes	NA	NA	NA	KSAQCFKMFY	33275	HLA-A*11:01, HLA-A*24:02, HLA-A*29:02, HLA-A*31:01, HLA-A*33:01,HLA-A*68:01	HLA-A*11:01, HLA-A*29:02	1	0	1	1	0	0	0	0	0	0.161998
EpI_NSP13_348	HLA-I	NSP13	467	477	KSAQCFKMFYK	11	Yes	NA	NA	NA	AQCFKMFYK, KSAQCFKMFY, SAQCFKMFYK	3944, 33275, 56947	HLA-A*03:01, HLA-A*11:01, HLA-A*24:02, HLA-A*29:02, HLA-A*31:01, HLA-A*33:01,HLA-A*68:01	HLA-A*11:01	1	0	1	0	0	0	0	0	0	0.103175
EpI_NSP13_349	HLA-I	NSP13	468	476	SAQCFKMFY	9	Yes	NA	NA	NA	KSAQCFKMFY, SAQCFKMFYK	33275, 56947	HLA-A*11:01, HLA-A*24:02, HLA-A*29:02, HLA-A*03:01, HLA-A*11:01, HLA-A*31:01, HLA-A*33:01,HLA-A*68:01	HLA-A*11:01, HLA-A*29:02, HLA-B*35:01, HLA-B*35:05, HLA-B*35:11, HLA-B*35:43	2	0	2	2	1	0	2	1	1	0.79155
EpI_NSP13_350	HLA-I	NSP13	468	477	SAQCFKMFYK	10	Yes	NA	NA	NA	AQCFKMFYK, SAQCFKMFYK	3944, 56947	HLA-A*11:01, HLA-A*24:02, HLA-A*29:02, HLA-A*03:01, HLA-A*11:01, HLA-A*31:01, HLA-A*33:01,HLA-A*68:01	HLA-A*11:01	1	0	1	0	0	0	0	0	0	0.103175
EpI_NSP13_351	HLA-I	NSP13	469	477	AQCFKMFYK	9	Yes	NA	NA	NA	AQCFKMFYK, SAQCFKMFYK	3944, 56947	HLA-A*11:01, HLA-A*24:02, HLA-A*29:02, HLA-A*03:01, HLA-A*11:01, HLA-A*31:01, HLA-A*33:01,HLA-A*68:01	HLA-A*03:01, HLA-A*11:01, HLA-A*31:01	3	0	2	2	1	1	1	1	1	0.922106
EpI_NSP13_352	HLA-I	NSP13	473	481	KMFYKGVIT	9	No	NA	NA	NA	NA	NA	NA	HLA-A*02:04, HLA-B*15:04	0	0	0	0	0	0	1	0	1	0.172619
EpI_NSP13_353	HLA-I	NSP13	473	482	KMFYKGVITH	10	No	NA	NA	NA	NA	NA	NA	HLA-A*03:01, HLA-A*31:01, HLA-B*15:04	2	0	1	2	1	1	2	1	1	0.943931
EpI_NSP13_354	HLA-I	NSP13	474	482	MFYKGVITH	9	No	NA	NA	NA	NA	NA	NA	HLA-A*29:02, HLA-B*15:04, HLA-C*07:01	1	0	1	2	1	0	1	0	0	0.404645
EpI_NSP13_355	HLA-I	NSP13	480	490	ITHDVSSAINR	11	No	NA	NA	NA	NA	NA	NA	HLA-A*68:01	0	0	0	1	1	1	0	0	0	0.317647
EpI_NSP13_356	HLA-I	NSP13	480	488	ITHDVSSAI	9	No	NA	NA	NA	NA	NA	NA	HLA-A*68:02, HLA-B*15:04, HLA-B*35:11, HLA-B*35:12, HLA-B*35:43, HLA-C*01:02, HLA-C*03:04, HLA-C*06:02, HLA-C*07:01, HLA-C*15:03, HLA-C*16:01	2	0	4	2	6	0	2	1	6	1.419
EpI_NSP13_357	HLA-I	NSP13	481	488	THDVSSAI	8	No	NA	NA	NA	NA	NA	NA	HLA-B*39:05, HLA-B*39:09	0	0	0	1	0	0	0	0	2	0.154062
EpI_NSP13_358	HLA-I	NSP13	482	490	HDVSSAINR	9	No	NA	NA	NA	NA	NA	NA	HLA-A*68:01	0	0	0	1	1	1	0	0	0	0.317647
EpI_NSP13_359	HLA-I	NSP13	485	493	SSAINRPQI	9	No	NA	NA	NA	NA	NA	NA	HLA-C*01:02, HLA-C*03:04, HLA-C*15:03, HLA-C*16:01	0	0	2	0	3	0	0	1	3	0.525677
EpI_NSP13_360	HLA-I	NSP13	486	495	SAINRPQIGV	10	No	NA	NA	NA	NA	NA	NA	HLA-A*68:02, HLA-C*15:03	0	0	0	0	0	0	0	0	2	0.0952381
EpI_NSP13_361	HLA-I	NSP13	487	495	AINRPQIGV	9	No	NA	NA	NA	NA	NA	NA	HLA-A*02:04, HLA-A*02:22, HLA-C*15:03	0	0	0	0	0	0	0	0	3	0.142857
EpI_NSP13_362	HLA-I	NSP13	487	497	AINRPQIGVVR	11	No	NA	NA	NA	NA	NA	NA	HLA-A*31:01	1	0	0	1	0	0	1	1	1	0.398109
EpI_NSP13_363	HLA-I	NSP13	488	497	INRPQIGVVR	10	No	NA	NA	NA	NA	NA	NA	HLA-A*31:01	1	0	0	1	0	0	1	1	1	0.398109
EpI_NSP13_364	HLA-I	NSP13	488	496	INRPQIGVV	9	No	NA	NA	NA	NA	NA	NA	HLA-B*15:04	0	0	0	0	0	0	1	0	0	0.125
EpI_NSP13_365	HLA-I	NSP13	489	499	NRPQIGVVREF	11	No	NA	NA	NA	NA	NA	NA	HLA-C*07:01	1	0	1	1	1	0	0	0	0	0.220822
EpI_NSP13_366	HLA-I	NSP13	490	499	RPQIGVVREF	10	No	NA	NA	NA	NA	NA	NA	HLA-B*07:02, HLA-B*15:04, HLA-B*35:05, HLA-B*35:11, HLA-B*35:12, HLA-B*35:43	1	0	1	1	1	0	3	0	2	0.69106
EpI_NSP13_367	HLA-I	NSP13	490	500	RPQIGVVREFL	11	No	NA	NA	NA	NA	NA	NA	HLA-B*07:02	1	0	1	1	0	0	0	0	0	0.161998
EpI_NSP13_368	HLA-I	NSP13	491	499	PQIGVVREF	9	No	NA	NA	NA	NA	NA	NA	HLA-B*15:04	0	0	0	0	0	0	1	0	0	0.125
EpI_NSP13_369	HLA-I	NSP13	494	502	GVVREFLTR	9	Yes	NA	NA	NA	GVVREFLTR	23204	HLA-A*11:01, HLA-A*31:01, HLA-A*68:01	HLA-A*11:01, HLA-A*31:01, HLA-A*68:01	2	0	1	2	1	1	1	1	1	0.818931
EpI_NSP13_370	HLA-I	NSP13	495	502	VVREFLTR	8	Yes	NA	NA	NA	GVVREFLTR	23204	HLA-A*11:01, HLA-A*31:01, HLA-A*68:01	HLA-A*31:01	1	0	0	1	0	0	1	1	1	0.398109
EpI_NSP13_371	HLA-I	NSP13	497	505	REFLTRNPA	9	Yes	NA	NA	NA	REFLTRNPA, REFLTRNPAW	53496, 53497	HLA-B*18:01, HLA-B*40:01, HLA-A*40:02, HLA-B*44:02, HLA-A*44:03, HLA-B*45:01	HLA-B*40:02	0	0	0	0	1	1	0	0	1	0.306443
EpI_NSP13_372	HLA-I	NSP13	497	506	REFLTRNPAW	10	Yes	NA	NA	NA	REFLTRNPA, REFLTRNPAW	53496, 53497	HLA-B*18:01, HLA-B*40:01, HLA-A*40:02, HLA-B*44:02, HLA-A*44:03, HLA-B*45:01	HLA-B*44:03	1	0	1	0	1	0	0	0	0	0.161998
EpI_NSP13_373	HLA-I	NSP13	499	508	FLTRNPAWRK	10	Yes	NA	NA	NA	LTRNPAWRK	40154	HLA-A*03:01, HLA-A*11:01, HLA-A*33:01, HLA-A*68:01	HLA-A*03:01, HLA-A*68:01	1	0	1	2	2	2	0	0	0	0.738469
EpI_NSP13_374	HLA-I	NSP13	499	507	FLTRNPAWR	9	No	NA	NA	NA	NA	NA	NA	HLA-A*31:01, HLA-A*68:01	1	0	0	2	1	1	1	1	1	0.715756
EpI_NSP13_375	HLA-I	NSP13	500	508	LTRNPAWRK	9	Yes	NA	NA	NA	LTRNPAWRK	40154	HLA-A*03:01, HLA-A*11:01, HLA-A*33:01, HLA-A*68:01	HLA-A*03:01, HLA-A*11:01, HLA-A*68:01	2	0	2	2	2	2	0	0	0	0.841643
EpI_NSP13_376	HLA-I	NSP13	500	507	LTRNPAWR	8	Yes	NA	NA	NA	LTRNPAWRK	40154	HLA-A*03:01, HLA-A*11:01, HLA-A*33:01, HLA-A*68:01	HLA-A*31:01	1	0	0	1	0	0	1	1	1	0.398109
EpI_NSP13_377	HLA-I	NSP13	501	511	TRNPAWRKAVF	11	Yes	NA	NA	NA	NPAWRKAVF	45304	HLA-A*03:01, HLA-A*11:01, HLA-A*33:01, HLA-A*68:01	HLA-C*07:01	1	0	1	1	1	0	0	0	0	0.220822
EpI_NSP13_378	HLA-I	NSP13	503	510	NPAWRKAV	8	Yes	NA	NA	NA	NPAWRKAVF, NPAWRKAVFI	45304, 45305	HLA-B*07:02, HLA-B*35:01, HLA-B*51:01, HLA-B*53:01, HLA-B*54:01	HLA-B*07:02, HLA-B*08:01	2	0	2	1	0	0	0	0	0	0.265173
EpI_NSP13_379	HLA-I	NSP13	503	511	NPAWRKAVF	9	Yes	NA	NA	NA	NPAWRKAVF, NPAWRKAVFI	45304, 45305	HLA-B*07:02, HLA-B*35:01, HLA-B*51:01, HLA-B*53:01, HLA-B*54:01	HLA-B*07:02, HLA-B*08:01, HLA-B*35:01, HLA-B*35:05, HLA-B*35:11, HLA-B*35:12, HLA-B*35:43	3	0	3	2	1	0	2	1	2	0.942344
EpI_NSP13_380	HLA-I	NSP13	503	512	NPAWRKAVFI	10	Yes	NA	NA	NA	NPAWRKAVF, NPAWRKAVFI	45304, 45305	HLA-B*07:02, HLA-B*35:01, HLA-B*51:01, HLA-B*53:01, HLA-B*54:01	HLA-B*07:02	1	0	1	1	0	0	0	0	0	0.161998
EpI_NSP13_381	HLA-I	NSP13	507	515	RKAVFISPY	9	Yes	NA	NA	NA	RKAVFISPY	54327	HLA-A*26:01, HLA-A*29:02, HLA-A*30:02	HLA-B*15:04	0	0	0	0	0	0	1	0	0	0.125
EpI_NSP13_382	HLA-I	NSP13	511	520	FISPYNSQNA	10	No	NA	NA	NA	NA	NA	NA	HLA-A*02:22	0	0	0	0	0	0	0	0	1	0.047619
EpI_NSP13_383	HLA-I	NSP13	511	521	FISPYNSQNAV	11	Yes	NA	NA	NA	SPYNSQNAV	60344	HLA-B*07:02, HLA-B*51:01, HLA-B*54:01	HLA-A*02:22, HLA-B*35:12	0	0	0	0	0	0	0	0	2	0.0952381
EpI_NSP13_384	HLA-I	NSP13	512	521	ISPYNSQNAV	10	Yes	NA	NA	NA	SPYNSQNAV	60344	HLA-B*07:02, HLA-B*51:01, HLA-B*54:01	HLA-B*35:12	0	0	0	0	0	0	0	0	1	0.047619
EpI_NSP13_385	HLA-I	NSP13	513	521	SPYNSQNAV	9	Yes	NA	NA	NA	SPYNSQNAV, SPYNSQNAVA	60344, 60345	HLA-B*07:02, HLA-B*51:01, HLA-B*54:01	HLA-B*07:02, HLA-B*35:05, HLA-B*35:11, HLA-B*35:12, HLA-B*35:43, HLA-B*39:05, HLA-B*39:09, HLA-C*01:02, HLA-C*03:04, HLA-C*16:01	1	0	3	2	4	0	2	1	6	1.19818
EpI_NSP13_386	HLA-I	NSP13	513	522	SPYNSQNAVA	10	Yes	NA	NA	NA	SPYNSQNAV, SPYNSQNAVA	60344, 60345	HLA-B*07:02, HLA-B*51:01, HLA-B*54:01	HLA-B*07:02	1	0	1	1	0	0	0	0	0	0.161998
EpI_NSP13_387	HLA-I	NSP13	515	524	YNSQNAVASK	10	No	NA	NA	NA	NA	NA	NA	HLA-A*68:01	0	0	0	1	1	1	0	0	0	0.317647
EpI_NSP13_388	HLA-I	NSP13	516	524	NSQNAVASK	9	No	NA	NA	NA	NA	NA	NA	HLA-A*11:01, HLA-A*68:01	1	0	1	1	1	1	0	0	0	0.420822
EpI_NSP13_389	HLA-I	NSP13	517	525	SQNAVASKI	9	No	NA	NA	NA	NA	NA	NA	HLA-B*15:04, HLA-B*39:05, HLA-B*39:09, HLA-C*15:03	0	0	0	1	0	0	1	0	3	0.326681
EpI_NSP13_390	HLA-I	NSP13	520	528	AVASKILGL	9	No	NA	NA	NA	NA	NA	NA	HLA-A*02:04, HLA-A*02:22, HLA-B*15:04, HLA-C*01:02, HLA-C*03:04, HLA-C*07:01, HLA-C*15:03, HLA-C*16:01	1	0	3	1	4	0	1	1	5	0.966737
EpI_NSP13_391	HLA-I	NSP13	524	533	KILGLPTQTV	10	Yes	NA	NA	NA	ILGLPTQTV	27078	HLA-A*02:01, HLA-A*15:01	HLA-A*02:01, HLA-A*02:04, HLA-A*02:11, HLA-A*02:17, HLA-A*02:22	1	0	1	1	1	1	1	2	4	0.95852
EpI_NSP13_392	HLA-I	NSP13	525	533	ILGLPTQTV	9	Yes	NA	NA	NA	ILGLPTQTV	27078	HLA-A*02:01, HLA-A*15:01	HLA-A*02:01, HLA-A*02:04, HLA-A*02:11, HLA-A*02:22, HLA-C*01:02, HLA-C*15:03	1	0	1	1	2	1	1	2	5	1.06496
EpI_NSP13_393	HLA-I	NSP13	531	541	QTVDSSQGSEY	11	Yes	NA	NA	NA	TVDSSQGSEY, VDSSQGSEY	66980, 68073	HLA-A*01:01, HLA-A*26:01, HLA-A*29:02, HLA-A*30:02	HLA-A*29:02	0	0	0	1	0	0	0	0	0	0.0588235
EpI_NSP13_394	HLA-I	NSP13	532	541	TVDSSQGSEY	10	Yes	NA	NA	NA	TVDSSQGSEY, VDSSQGSEY	66980, 68073	HLA-A*01:01, HLA-A*26:01, HLA-A*29:02, HLA-A*30:02	HLA-A*01:01, HLA-B*15:04, HLA-B*35:05, HLA-B*35:11, HLA-B*35:43	1	0	1	1	2	0	3	0	1	0.702264
EpI_NSP13_395	HLA-I	NSP13	534	541	DSSQGSEY	8	Yes	NA	NA	NA	DSSQGSEYDY, TVDSSQGSEY, VDSSQGSEY	10241, 66980, 68073	HLA-A*01:01, HLA-A*26:01, HLA-A*29:02, HLA-A*30:02	HLA-A*01:01	1	0	1	1	1	0	0	0	0	0.220822
EpI_NSP13_396	HLA-I	NSP13	534	543	DSSQGSEYDY	10	Yes	NA	NA	NA	DSSQGSEYDY, SSQGSEYDY	10241, 61304	HLA-A*01:01, HLA-A*29:02, HLA-A*30:02	HLA-A*01:01	1	0	1	1	1	0	0	0	0	0.220822
EpI_NSP13_397	HLA-I	NSP13	535	543	SSQGSEYDY	9	Yes	NA	NA	NA	DSSQGSEYDY, SSQGSEYDY	10241, 61304	HLA-A*01:01, HLA-A*29:02, HLA-A*30:02	HLA-A*01:01, HLA-A*29:02, HLA-B*35:05	1	0	1	2	1	0	1	0	0	0.404645
EpI_NSP13_398	HLA-I	NSP13	536	544	SQGSEYDYV	9	No	NA	NA	NA	NA	NA	NA	HLA-A*02:22	0	0	0	0	0	0	0	0	1	0.047619
EpI_NSP13_399	HLA-I	NSP13	539	546	SEYDYVIF	8	Yes	NA	NA	NA	SEYDYVIFT	57681	HLA-B*18:01, HLA-B*40:01, HLA-A*40:02, HLA-B*44:02, HLA-A*44:03, HLA-B*45:01	HLA-B*18:01, HLA-B*39:05, HLA-B*40:02, HLA-B*44:03	2	0	1	1	2	1	0	0	2	0.630439
EpI_NSP13_400	HLA-I	NSP13	539	548	SEYDYVIFTQ	10	Yes	NA	NA	NA	SEYDYVIFT	57681	HLA-B*18:01, HLA-B*40:01, HLA-A*40:02, HLA-B*44:02, HLA-A*44:03, HLA-B*45:01	HLA-B*18:01, HLA-B*44:03	2	0	1	1	1	0	0	0	0	0.276377
EpI_NSP13_401	HLA-I	NSP13	539	547	SEYDYVIFT	9	Yes	NA	NA	NA	SEYDYVIFT	57681	HLA-B*18:01, HLA-B*40:01, HLA-A*40:02, HLA-B*44:02, HLA-A*44:03, HLA-B*45:01	HLA-B*44:03	1	0	1	0	1	0	0	0	0	0.161998
EpI_NSP13_402	HLA-I	NSP13	551	560	ETAHSCNVNR	10	No	NA	NA	NA	NA	NA	NA	HLA-A*68:01	0	0	0	1	1	1	0	0	0	0.317647
EpI_NSP13_403	HLA-I	NSP13	552	560	TAHSCNVNR	9	No	NA	NA	NA	NA	NA	NA	HLA-A*31:01, HLA-A*68:01	1	0	0	2	1	1	1	1	1	0.715756
EpI_NSP13_404	HLA-I	NSP13	552	561	TAHSCNVNRF	10	No	NA	NA	NA	NA	NA	NA	HLA-B*35:05, HLA-B*35:11, HLA-B*35:43	0	0	0	0	1	0	2	0	1	0.356443
EpI_NSP13_405	HLA-I	NSP13	553	561	AHSCNVNRF	9	No	NA	NA	NA	NA	NA	NA	HLA-B*39:05, HLA-B*39:09	0	0	0	1	0	0	0	0	2	0.154062
EpI_NSP13_406	HLA-I	NSP13	557	567	NVNRFNVAITR	11	No	NA	NA	NA	NA	NA	NA	HLA-A*68:01	0	0	0	1	1	1	0	0	0	0.317647
EpI_NSP13_407	HLA-I	NSP13	557	565	NVNRFNVAI	9	No	NA	NA	NA	NA	NA	NA	HLA-A*68:02, HLA-B*35:12, HLA-C*01:02, HLA-C*03:04, HLA-C*15:03, HLA-C*16:01	0	0	2	0	3	0	0	1	5	0.620915
EpI_NSP13_408	HLA-I	NSP13	559	567	NRFNVAITR	9	No	NA	NA	NA	NA	NA	NA	HLA-C*07:01	1	0	1	1	1	0	0	0	0	0.220822
EpI_NSP13_409	HLA-I	NSP13	560	569	RFNVAITRAK	10	Yes	NA	NA	NA	RFNVAITRAK	53748	HLA-A*03:01, HLA-A*11:01, HLA-A*31:01, HLA-A*68:01	HLA-A*03:01, HLA-A*31:01	2	0	1	2	1	1	1	1	1	0.818931
EpI_NSP13_410	HLA-I	NSP13	560	567	RFNVAITR	8	Yes	NA	NA	NA	RFNVAITRAK	53748	HLA-A*03:01, HLA-A*11:01, HLA-A*31:01, HLA-A*68:01	HLA-A*31:01	1	0	0	1	0	0	1	1	1	0.398109
EpI_NSP13_411	HLA-I	NSP13	561	569	FNVAITRAK	9	Yes	NA	NA	NA	RFNVAITRAK	53748	HLA-A*03:01, HLA-A*11:01, HLA-A*31:01, HLA-A*68:01	HLA-A*68:01	0	0	0	1	1	1	0	0	0	0.317647
EpI_NSP13_412	HLA-I	NSP13	561	570	FNVAITRAKV	10	No	NA	NA	NA	NA	NA	NA	HLA-A*68:02	0	0	0	0	0	0	0	0	1	0.047619
EpI_NSP13_413	HLA-I	NSP13	562	570	NVAITRAKV	9	No	NA	NA	NA	NA	NA	NA	HLA-A*68:02	0	0	0	0	0	0	0	0	1	0.047619
EpI_NSP13_414	HLA-I	NSP13	565	573	ITRAKVGIL	9	No	NA	NA	NA	NA	NA	NA	HLA-C*01:02, HLA-C*15:03, HLA-C*16:01	0	0	1	0	2	0	0	0	2	0.260504
EpI_NSP13_415	HLA-I	NSP13	566	573	TRAKVGIL	8	No	NA	NA	NA	NA	NA	NA	HLA-B*39:05, HLA-B*39:09, HLA-C*07:01	1	0	1	2	1	0	0	0	2	0.374883
EpI_NSP13_416	HLA-I	NSP13	566	574	TRAKVGILC	9	No	NA	NA	NA	NA	NA	NA	HLA-B*39:05, HLA-B*39:09	0	0	0	1	0	0	0	0	2	0.154062
EpI_NSP13_417	HLA-I	NSP13	566	575	TRAKVGILCI	10	No	NA	NA	NA	NA	NA	NA	HLA-C*07:01	1	0	1	1	1	0	0	0	0	0.220822
EpI_NSP13_418	HLA-I	NSP13	567	575	RAKVGILCI	9	No	NA	NA	NA	NA	NA	NA	HLA-C*15:03, HLA-C*16:01	0	0	1	0	1	0	0	0	1	0.154062
EpI_NSP13_419	HLA-I	NSP13	574	582	CIMSDRDLY	9	No	NA	NA	NA	NA	NA	NA	HLA-A*29:02, HLA-B*15:01, HLA-B*35:05, HLA-B*35:11, HLA-B*35:43	0	0	0	1	1	0	2	0	2	0.462885
EpI_NSP13_420	HLA-I	NSP13	575	582	IMSDRDLY	8	No	NA	NA	NA	NA	NA	NA	HLA-A*01:01, HLA-A*29:02, HLA-B*15:01	1	0	1	2	1	0	0	0	1	0.327264
EpI_NSP13_421	HLA-I	NSP13	575	584	IMSDRDLYDK	10	No	NA	NA	NA	NA	NA	NA	HLA-A*03:01, HLA-A*11:01	2	0	2	1	1	1	0	0	0	0.523996
EpI_NSP13_422	HLA-I	NSP13	576	584	MSDRDLYDK	9	No	NA	NA	NA	NA	NA	NA	HLA-A*11:01	1	0	1	0	0	0	0	0	0	0.103175
EpI_NSP13_423	HLA-I	NSP13	578	585	DRDLYDKL	8	No	NA	NA	NA	NA	NA	NA	HLA-B*39:09	0	0	0	1	0	0	0	0	1	0.106443
EpI_NSP13_424	HLA-I	NSP13	579	588	RDLYDKLQFT	10	No	NA	NA	NA	NA	NA	NA	HLA-A*02:04, HLA-A*02:22	0	0	0	0	0	0	0	0	2	0.0952381
EpI_NSP13_425	HLA-I	NSP13	580	588	DLYDKLQFT	9	No	NA	NA	NA	NA	NA	NA	HLA-A*02:22	0	0	0	0	0	0	0	0	1	0.047619
EpI_NSP13_426	HLA-I	NSP13	581	590	LYDKLQFTSL	10	No	NA	NA	NA	NA	NA	NA	HLA-A*24:02	1	0	1	1	1	1	0	1	1	0.579552
EpI_NSP13_427	HLA-I	NSP13	582	590	YDKLQFTSL	9	No	NA	NA	NA	NA	NA	NA	HLA-B*08:01, HLA-B*39:05, HLA-B*39:09	1	0	1	1	0	0	0	0	2	0.257236
EpI_NSP13_428	HLA-I	NSP13	583	590	DKLQFTSL	8	No	NA	NA	NA	NA	NA	NA	HLA-B*08:01	1	0	1	0	0	0	0	0	0	0.103175
EpI_NSP13_429	HLA-I	NSP13	584	592	KLQFTSLEI	9	No	NA	NA	NA	NA	NA	NA	HLA-A*02:01, HLA-A*02:04, HLA-A*02:11, HLA-A*02:22, HLA-C*01:02, HLA-C*15:03	1	0	1	1	2	1	1	2	5	1.06496
EpI_NSP13_430	HLA-I	NSP13	586	594	QFTSLEIPR	9	Yes	NA	NA	NA	LQFTSLEIPR	38838	HLA-A*03:01, HLA-A*11:01, HLA-A*31:01, HLA-A*33:01, HLA-A*68:01	HLA-A*31:01	1	0	0	1	0	0	1	1	1	0.398109
EpI_NSP13_431	HLA-I	NSP13	587	595	FTSLEIPRR	9	No	NA	NA	NA	NA	NA	NA	HLA-A*11:01, HLA-A*31:01, HLA-A*68:01	2	0	1	2	1	1	1	1	1	0.818931
EpI_NSP13_432	HLA-I	NSP13	587	594	FTSLEIPR	8	Yes	NA	NA	NA	LQFTSLEIPR	38838	HLA-A*03:01, HLA-A*11:01, HLA-A*31:01, HLA-A*33:01, HLA-A*68:01	HLA-A*68:01	0	0	0	1	1	1	0	0	0	0.317647
EpI_NSP13_433	HLA-I	NSP13	590	600	LEIPRRNVATL	11	Yes	NA	NA	NA	IPRRNVATL	28050	HLA-B*07:02, HLA-A*02:01, HLA-B*35:01, HLA-B*08:01, HLA-B*51:01	HLA-B*39:05	0	0	0	0	0	0	0	0	1	0.047619
EpI_NSP13_434	HLA-I	NSP13	592	600	IPRRNVATL	9	Yes	NA	NA	NA	IPRRNVATL	28050	HLA-B*07:02, HLA-A*02:01, HLA-B*35:01, HLA-B*08:01, HLA-B*51:01	HLA-B*07:02, HLA-B*08:01, HLA-B*35:05, HLA-B*35:11, HLA-B*35:12, HLA-B*35:43, HLA-B*39:09, HLA-C*01:02, HLA-C*03:04, HLA-C*16:01	2	0	4	2	4	0	2	1	5	1.25373
EpI_NSP13_435	HLA-I	NSP13	592	601	IPRRNVATLQ	10	Yes	NA	NA	NA	IPRRNVATL	28050	HLA-B*07:02, HLA-A*02:01, HLA-B*35:01, HLA-B*08:01, HLA-B*51:01	HLA-B*07:02	1	0	1	1	0	0	0	0	0	0.161998
EpI_NSP14_1	HLA-I	NSP14	1	8	AENVTGLF	8	No	NA	NA	NA	NA	NA	NA	HLA-B*44:03	1	0	1	0	1	0	0	0	0	0.161998
EpI_NSP14_2	HLA-I	NSP14	6	14	GLFKDCSKV	9	No	NA	NA	NA	NA	NA	NA	HLA-A*02:01, HLA-A*02:04, HLA-A*02:11, HLA-A*02:17, HLA-A*02:22	1	0	1	1	1	1	1	2	4	0.95852
EpI_NSP14_3	HLA-I	NSP14	17	27	GLHPTQAPTHL	11	No	NA	NA	NA	NA	NA	NA	HLA-A*02:22	0	0	0	0	0	0	0	0	1	0.047619
EpI_NSP14_4	HLA-I	NSP14	18	27	LHPTQAPTHL	10	No	NA	NA	NA	NA	NA	NA	HLA-B*35:12, HLA-B*39:05, HLA-B*39:09	0	0	0	1	0	0	0	0	3	0.201681
EpI_NSP14_5	HLA-I	NSP14	19	27	HPTQAPTHL	9	No	NA	NA	NA	NA	NA	NA	HLA-B*07:02, HLA-B*35:01, HLA-B*35:05, HLA-B*35:11, HLA-B*35:12, HLA-B*35:43, HLA-B*39:05, HLA-B*39:09, HLA-C*01:02, HLA-C*03:04	2	0	3	3	3	0	2	2	6	1.36485
EpI_NSP14_6	HLA-I	NSP14	19	29	HPTQAPTHLSV	11	No	NA	NA	NA	NA	NA	NA	HLA-B*07:02, HLA-B*35:12	1	0	1	1	0	0	0	0	1	0.209617
EpI_NSP14_7	HLA-I	NSP14	21	29	TQAPTHLSV	9	No	NA	NA	NA	NA	NA	NA	HLA-A*02:04, HLA-A*02:22, HLA-B*15:04, HLA-B*39:05, HLA-B*39:09, HLA-C*01:02, HLA-C*03:04, HLA-C*07:01, HLA-C*15:03, HLA-C*16:01	1	0	3	2	4	0	1	1	7	1.1208
EpI_NSP14_8	HLA-I	NSP14	23	33	APTHLSVDTKF	11	No	NA	NA	NA	NA	NA	NA	HLA-B*35:05	0	0	0	0	0	0	1	0	0	0.125
EpI_NSP14_9	HLA-I	NSP14	25	33	THLSVDTKF	9	No	NA	NA	NA	NA	NA	NA	HLA-A*23:01, HLA-B*39:05, HLA-B*39:09	0	0	1	1	0	0	0	0	2	0.201681
EpI_NSP14_10	HLA-I	NSP14	26	34	HLSVDTKFK	9	No	NA	NA	NA	NA	NA	NA	HLA-A*03:01, HLA-A*11:01, HLA-A*68:01	2	0	2	2	2	2	0	0	0	0.841643
EpI_NSP14_11	HLA-I	NSP14	30	38	DTKFKTEGL	9	No	NA	NA	NA	NA	NA	NA	HLA-A*68:02	0	0	0	0	0	0	0	0	1	0.047619
EpI_NSP14_12	HLA-I	NSP14	37	45	GLCVDIPGI	9	No	NA	NA	NA	NA	NA	NA	HLA-A*02:01, HLA-A*02:04, HLA-A*02:11, HLA-A*02:17, HLA-A*02:22	1	0	1	1	1	1	1	2	4	0.95852
EpI_NSP14_13	HLA-I	NSP14	37	47	GLCVDIPGIPK	11	Yes	NA	NA	NA	CVDIPGIPK	7258	HLA-A*03:01, HLA-A*11:01, HLA-A*68:01	HLA-A*11:01	1	0	1	0	0	0	0	0	0	0.103175
EpI_NSP14_14	HLA-I	NSP14	39	47	CVDIPGIPK	9	Yes	NA	NA	NA	CVDIPGIPK	7258	HLA-A*03:01, HLA-A*11:01, HLA-A*68:01	HLA-A*03:01, HLA-A*11:01, HLA-A*68:01	2	0	2	2	2	2	0	0	0	0.841643
EpI_NSP14_15	HLA-I	NSP14	41	51	DIPGIPKDMTY	11	No	NA	NA	NA	NA	NA	NA	HLA-B*35:05, HLA-B*35:11, HLA-B*35:43	0	0	0	0	1	0	2	0	1	0.356443
EpI_NSP14_16	HLA-I	NSP14	42	51	IPGIPKDMTY	10	No	NA	NA	NA	NA	NA	NA	HLA-B*15:04, HLA-B*35:01, HLA-B*35:05, HLA-B*35:11, HLA-B*35:12, HLA-B*35:43	1	0	1	1	1	0	3	1	2	0.802171
EpI_NSP14_17	HLA-I	NSP14	42	52	IPGIPKDMTYR	11	No	NA	NA	NA	NA	NA	NA	HLA-B*35:05, HLA-B*35:11	0	0	0	0	0	0	2	0	0	0.25
EpI_NSP14_18	HLA-I	NSP14	44	52	GIPKDMTYR	9	No	NA	NA	NA	NA	NA	NA	HLA-A*11:01, HLA-A*31:01, HLA-A*68:01	2	0	1	2	1	1	1	1	1	0.818931
EpI_NSP14_19	HLA-I	NSP14	44	53	GIPKDMTYRR	10	No	NA	NA	NA	NA	NA	NA	HLA-A*68:01	0	0	0	1	1	1	0	0	0	0.317647
EpI_NSP14_20	HLA-I	NSP14	45	54	IPKDMTYRRL	10	No	NA	NA	NA	NA	NA	NA	HLA-B*07:02, HLA-B*35:12	1	0	1	1	0	0	0	0	1	0.209617
EpI_NSP14_21	HLA-I	NSP14	48	57	DMTYRRLISM	10	No	NA	NA	NA	NA	NA	NA	HLA-B*08:01	1	0	1	0	0	0	0	0	0	0.103175
EpI_NSP14_22	HLA-I	NSP14	49	57	MTYRRLISM	9	No	NA	NA	NA	NA	NA	NA	HLA-A*68:02, HLA-B*08:01, HLA-B*15:01, HLA-B*15:04, HLA-B*35:05, HLA-B*35:11, HLA-B*35:12, HLA-B*35:43, HLA-C*01:02, HLA-C*03:04, HLA-C*06:02, HLA-C*07:01, HLA-C*12:03, HLA-C*15:03, HLA-C*16:01	4	0	5	2	6	0	3	1	7	1.75035
EpI_NSP14_23	HLA-I	NSP14	50	60	TYRRLISMMGF	11	No	NA	NA	NA	NA	NA	NA	HLA-A*23:01, HLA-A*24:02	1	0	2	1	1	1	0	1	1	0.627171
EpI_NSP14_24	HLA-I	NSP14	50	58	TYRRLISMM	9	No	NA	NA	NA	NA	NA	NA	HLA-A*24:02, HLA-C*06:02, HLA-C*07:01	3	0	3	3	3	1	0	1	1	1.0212
EpI_NSP14_25	HLA-I	NSP14	51	58	YRRLISMM	8	No	NA	NA	NA	NA	NA	NA	HLA-C*07:01	1	0	1	1	1	0	0	0	0	0.220822
EpI_NSP14_26	HLA-I	NSP14	51	60	YRRLISMMGF	10	No	NA	NA	NA	NA	NA	NA	HLA-C*07:01	1	0	1	1	1	0	0	0	0	0.220822
EpI_NSP14_27	HLA-I	NSP14	52	60	RRLISMMGF	9	No	NA	NA	NA	NA	NA	NA	HLA-B*39:05, HLA-B*39:09, HLA-C*07:01	1	0	1	2	1	0	0	0	2	0.374883
EpI_NSP14_28	HLA-I	NSP14	53	61	RLISMMGFK	9	Yes	NA	NA	NA	RLISMMGFK	54597	HLA-A*03:01, HLA-A*11:01, HLA-A*68:01	HLA-A*03:01, HLA-A*11:01, HLA-A*31:01	3	0	2	2	1	1	1	1	1	0.922106
EpI_NSP14_29	HLA-I	NSP14	53	60	RLISMMGF	8	Yes	NA	NA	NA	RLISMMGFK	54597	HLA-A*03:01, HLA-A*11:01, HLA-A*68:01	HLA-B*15:01	0	0	0	0	0	0	0	0	1	0.047619
EpI_NSP14_30	HLA-I	NSP14	54	64	LISMMGFKMNY	11	Yes	NA	NA	NA	ISMMGFKMNY, SMMGFKMNY	28612, 59712	HLA-A*01:01, HLA-A*29:02, HLA-A*30:02, HLA-A*03:01, HLA-A*11:01, HLA-A*26:01, HLA-A*31:01, HLA-A*33:01	HLA-A*29:02	0	0	0	1	0	0	0	0	0	0.0588235
EpI_NSP14_31	HLA-I	NSP14	55	64	ISMMGFKMNY	10	Yes	NA	NA	NA	ISMMGFKMNY, SMMGFKMNY	28612, 59712	HLA-A*01:01, HLA-A*29:02, HLA-A*30:02, HLA-A*03:01, HLA-A*11:01, HLA-A*26:01, HLA-A*31:01, HLA-A*33:01	HLA-A*03:01, HLA-A*11:01, HLA-A*29:02, HLA-B*15:01, HLA-B*15:04	2	0	2	2	1	1	1	0	1	0.755439
EpI_NSP14_32	HLA-I	NSP14	56	66	SMMGFKMNYQV	11	Yes	NA	NA	NA	SMMGFKMNY	59712	HLA-A*01:01, HLA-A*03:01, HLA-A*11:01, HLA-A*26:01, HLA-A*29:02, HLA-A*30:02, HLA-A*31:01, HLA-A*33:01	HLA-A*02:01, HLA-A*02:04, HLA-A*02:11, HLA-A*02:17, HLA-A*02:22	1	0	1	1	1	1	1	2	4	0.95852
EpI_NSP14_33	HLA-I	NSP14	56	64	SMMGFKMNY	9	Yes	NA	NA	NA	ISMMGFKMNY, SMMGFKMNY	28612, 59712	HLA-A*01:01, HLA-A*29:02, HLA-A*30:02, HLA-A*03:01, HLA-A*11:01, HLA-A*26:01, HLA-A*31:01, HLA-A*33:01	HLA-A*02:04, HLA-A*03:01, HLA-A*11:01, HLA-A*29:02, HLA-B*15:01, HLA-B*15:04, HLA-B*35:05, HLA-B*35:11, HLA-B*35:43, HLA-C*07:01, HLA-C*16:01	3	0	4	3	4	1	3	0	3	1.48676
EpI_NSP14_34	HLA-I	NSP14	57	66	MMGFKMNYQV	10	No	NA	NA	NA	NA	NA	NA	HLA-A*02:11	0	0	0	0	0	0	1	1	0	0.236111
EpI_NSP14_35	HLA-I	NSP14	57	64	MMGFKMNY	8	Yes	NA	NA	NA	ISMMGFKMNY, SMMGFKMNY	28612, 59712	HLA-A*01:01, HLA-A*03:01, HLA-A*11:01, HLA-A*26:01, HLA-A*29:02, HLA-A*30:02, HLA-A*31:01, HLA-A*33:01	HLA-A*29:02	0	0	0	1	0	0	0	0	0	0.0588235
EpI_NSP14_36	HLA-I	NSP14	58	66	MGFKMNYQV	9	No	NA	NA	NA	NA	NA	NA	HLA-A*68:02, HLA-C*15:03, HLA-C*16:01	0	0	1	0	1	0	0	0	2	0.201681
EpI_NSP14_37	HLA-I	NSP14	61	69	KMNYQVNGY	9	Yes	NA	NA	NA	KMNYQVNGY	32379	HLA-A*01:01, HLA-A*29:02, HLA-A*30:02	HLA-A*03:01, HLA-A*29:02, HLA-B*15:01, HLA-B*15:04, HLA-B*35:43	1	0	1	2	2	1	1	0	2	0.758707
EpI_NSP14_38	HLA-I	NSP14	63	72	NYQVNGYPNM	10	No	NA	NA	NA	NA	NA	NA	HLA-A*23:01, HLA-A*24:02	1	0	2	1	1	1	0	1	1	0.627171
EpI_NSP14_39	HLA-I	NSP14	63	73	NYQVNGYPNMF	11	No	NA	NA	NA	NA	NA	NA	HLA-A*23:01, HLA-A*24:02	1	0	2	1	1	1	0	1	1	0.627171
EpI_NSP14_40	HLA-I	NSP14	64	72	YQVNGYPNM	9	No	NA	NA	NA	NA	NA	NA	HLA-A*02:04, HLA-A*02:22, HLA-B*15:01, HLA-B*15:04, HLA-B*35:05, HLA-B*35:11, HLA-B*35:12, HLA-B*35:43, HLA-B*39:05, HLA-B*39:09, HLA-C*01:02, HLA-C*03:04, HLA-C*07:01, HLA-C*15:03, HLA-C*16:01	1	0	3	2	5	0	3	1	10	1.57248
EpI_NSP14_41	HLA-I	NSP14	64	73	YQVNGYPNMF	10	No	NA	NA	NA	NA	NA	NA	HLA-A*23:01, HLA-B*15:01, HLA-B*15:04, HLA-B*35:05, HLA-B*35:11, HLA-B*35:43, HLA-B*39:05, HLA-B*39:09	0	0	1	1	1	0	3	0	4	0.730742
EpI_NSP14_42	HLA-I	NSP14	65	74	QVNGYPNMFI	10	No	NA	NA	NA	NA	NA	NA	HLA-A*68:02	0	0	0	0	0	0	0	0	1	0.047619
EpI_NSP14_43	HLA-I	NSP14	65	73	QVNGYPNMF	9	No	NA	NA	NA	NA	NA	NA	HLA-B*15:04, HLA-B*35:05, HLA-B*35:11, HLA-B*35:43, HLA-C*01:02, HLA-C*03:04, HLA-C*07:01, HLA-C*15:03, HLA-C*16:01	1	0	3	1	5	0	3	1	4	1.22794
EpI_NSP14_44	HLA-I	NSP14	67	76	NGYPNMFITR	10	No	NA	NA	NA	NA	NA	NA	HLA-A*31:01, HLA-A*68:01	1	0	0	2	1	1	1	1	1	0.715756
EpI_NSP14_45	HLA-I	NSP14	68	76	GYPNMFITR	9	No	NA	NA	NA	NA	NA	NA	HLA-A*31:01	1	0	0	1	0	0	1	1	1	0.398109
EpI_NSP14_46	HLA-I	NSP14	69	77	YPNMFITRE	9	No	NA	NA	NA	NA	NA	NA	HLA-B*35:05, HLA-B*35:11	0	0	0	0	0	0	2	0	0	0.25
EpI_NSP14_47	HLA-I	NSP14	72	81	MFITREEAIR	10	No	NA	NA	NA	NA	NA	NA	HLA-A*31:01	1	0	0	1	0	0	1	1	1	0.398109
EpI_NSP14_48	HLA-I	NSP14	72	80	MFITREEAI	9	No	NA	NA	NA	NA	NA	NA	HLA-B*08:01	1	0	1	0	0	0	0	0	0	0.103175
EpI_NSP14_49	HLA-I	NSP14	73	81	FITREEAIR	9	No	NA	NA	NA	NA	NA	NA	HLA-A*68:01	0	0	0	1	1	1	0	0	0	0.317647
EpI_NSP14_50	HLA-I	NSP14	74	84	ITREEAIRHVR	11	No	NA	NA	NA	NA	NA	NA	HLA-A*31:01	1	0	0	1	0	0	1	1	1	0.398109
EpI_NSP14_51	HLA-I	NSP14	75	83	TREEAIRHV	9	No	NA	NA	NA	NA	NA	NA	HLA-B*39:05, HLA-B*39:09, HLA-C*06:02, HLA-C*07:01	2	0	2	3	2	0	0	0	2	0.595705
EpI_NSP14_52	HLA-I	NSP14	76	86	REEAIRHVRAW	11	Yes	NA	NA	NA	EEAIRHVRA, EEAIRHVRAW, REEAIRHVRA	11498, 11499, 53479	HLA-B*44:02, HLA-B*45:01, HLA-A*44:03, HLA-B*40:01, HLA-B*40:02, HLA-B*45:01	HLA-B*44:03	1	0	1	0	1	0	0	0	0	0.161998
EpI_NSP14_53	HLA-I	NSP14	77	86	EEAIRHVRAW	10	Yes	NA	NA	NA	EEAIRHVRA, EEAIRHVRAW	11498, 11499	HLA-B*44:02, HLA-B*45:01, HLA-A*44:03	HLA-B*44:03	1	0	1	0	1	0	0	0	0	0.161998
EpI_NSP14_54	HLA-I	NSP14	78	86	EAIRHVRAW	9	Yes	NA	NA	NA	EEAIRHVRAW	11499	HLA-B*44:02, HLA-B*45:01, HLA-A*44:03	HLA-B*35:05, HLA-B*35:11, HLA-B*35:43	0	0	0	0	1	0	2	0	1	0.356443
EpI_NSP14_55	HLA-I	NSP14	80	89	IRHVRAWIGF	10	No	NA	NA	NA	NA	NA	NA	HLA-C*07:01	1	0	1	1	1	0	0	0	0	0.220822
EpI_NSP14_56	HLA-I	NSP14	81	89	RHVRAWIGF	9	No	NA	NA	NA	NA	NA	NA	HLA-A*23:01, HLA-A*24:02, HLA-B*39:05, HLA-B*39:09, HLA-C*07:01	2	0	3	3	2	1	0	1	3	1.00205
EpI_NSP14_57	HLA-I	NSP14	82	91	HVRAWIGFDV	10	No	NA	NA	NA	NA	NA	NA	HLA-A*68:02	0	0	0	0	0	0	0	0	1	0.047619
EpI_NSP14_58	HLA-I	NSP14	83	91	VRAWIGFDV	9	No	NA	NA	NA	NA	NA	NA	HLA-B*39:05, HLA-B*39:09, HLA-C*07:01	1	0	1	2	1	0	0	0	2	0.374883
EpI_NSP14_59	HLA-I	NSP14	89	98	FDVEGCHATR	10	No	NA	NA	NA	NA	NA	NA	HLA-A*68:01	0	0	0	1	1	1	0	0	0	0.317647
EpI_NSP14_60	HLA-I	NSP14	90	98	DVEGCHATR	9	No	NA	NA	NA	NA	NA	NA	HLA-A*68:01	0	0	0	1	1	1	0	0	0	0.317647
EpI_NSP14_61	HLA-I	NSP14	96	105	ATREAVGTNL	10	No	NA	NA	NA	NA	NA	NA	HLA-B*15:04, HLA-B*39:09, HLA-C*15:03	0	0	0	1	0	0	1	0	2	0.279062
EpI_NSP14_62	HLA-I	NSP14	97	105	TREAVGTNL	9	No	NA	NA	NA	NA	NA	NA	HLA-B*39:05, HLA-B*39:09, HLA-C*07:01	1	0	1	2	1	0	0	0	2	0.374883
EpI_NSP14_63	HLA-I	NSP14	97	107	TREAVGTNLPL	11	No	NA	NA	NA	NA	NA	NA	HLA-B*39:09	0	0	0	1	0	0	0	0	1	0.106443
EpI_NSP14_64	HLA-I	NSP14	98	105	REAVGTNL	8	No	NA	NA	NA	NA	NA	NA	HLA-B*40:02	0	0	0	0	1	1	0	0	1	0.306443
EpI_NSP14_65	HLA-I	NSP14	98	107	REAVGTNLPL	10	No	NA	NA	NA	NA	NA	NA	HLA-B*40:02	0	0	0	0	1	1	0	0	1	0.306443
EpI_NSP14_66	HLA-I	NSP14	99	107	EAVGTNLPL	9	No	NA	NA	NA	NA	NA	NA	HLA-A*68:02, HLA-B*35:01, HLA-B*35:05, HLA-B*35:11, HLA-B*35:12, HLA-B*35:43, HLA-B*39:05, HLA-B*39:09, HLA-C*03:03, HLA-C*03:04, HLA-C*16:01	1	0	4	2	3	0	2	2	6	1.29809
EpI_NSP14_67	HLA-I	NSP14	101	109	VGTNLPLQL	9	No	NA	NA	NA	NA	NA	NA	HLA-C*01:02, HLA-C*03:04, HLA-C*15:03, HLA-C*16:01	0	0	2	0	3	0	0	1	3	0.525677
EpI_NSP14_68	HLA-I	NSP14	105	113	LPLQLGFST	9	No	NA	NA	NA	NA	NA	NA	HLA-B*07:02, HLA-B*35:01, HLA-B*35:05, HLA-B*35:12	2	0	2	2	0	0	1	1	1	0.607726
EpI_NSP14_69	HLA-I	NSP14	107	115	LQLGFSTGV	9	Yes	NA	NA	NA	LQLGFSTGV	38874	HLA-A*02:01, HLA-A*02:02, HLA-A*02:03, HLA-A*02:06, HLA-A*68:02	HLA-A*02:01, HLA-A*02:04, HLA-A*02:11, HLA-A*02:17, HLA-A*02:22, HLA-B*15:04	1	0	1	1	1	1	2	2	4	1.08352
EpI_NSP14_70	HLA-I	NSP14	108	117	QLGFSTGVNL	10	No	NA	NA	NA	NA	NA	NA	HLA-A*02:04, HLA-A*02:22	0	0	0	0	0	0	0	0	2	0.0952381
EpI_NSP14_71	HLA-I	NSP14	109	117	LGFSTGVNL	9	No	NA	NA	NA	NA	NA	NA	HLA-B*15:04, HLA-B*35:12, HLA-C*01:02, HLA-C*03:04, HLA-C*15:03, HLA-C*16:01	0	0	2	0	3	0	1	1	4	0.698296
EpI_NSP14_72	HLA-I	NSP14	111	119	FSTGVNLVA	9	No	NA	NA	NA	NA	NA	NA	HLA-A*68:02, HLA-C*03:04, HLA-C*15:03	0	0	1	0	1	0	0	1	3	0.360411
EpI_NSP14_73	HLA-I	NSP14	111	120	FSTGVNLVAV	10	No	NA	NA	NA	NA	NA	NA	HLA-A*68:02	0	0	0	0	0	0	0	0	1	0.047619
EpI_NSP14_74	HLA-I	NSP14	112	120	STGVNLVAV	9	No	NA	NA	NA	NA	NA	NA	HLA-A*68:02, HLA-C*01:02, HLA-C*15:03, HLA-C*16:01	0	0	1	0	2	0	0	0	3	0.308123
EpI_NSP14_75	HLA-I	NSP14	115	124	VNLVAVPTGY	10	No	NA	NA	NA	NA	NA	NA	HLA-B*15:04	0	0	0	0	0	0	1	0	0	0.125
EpI_NSP14_76	HLA-I	NSP14	116	125	NLVAVPTGYV	10	No	NA	NA	NA	NA	NA	NA	HLA-A*02:01, HLA-A*02:04, HLA-A*02:11, HLA-A*02:22, HLA-A*68:02	1	0	1	1	1	1	1	2	4	0.95852
EpI_NSP14_77	HLA-I	NSP14	116	124	NLVAVPTGY	9	No	NA	NA	NA	NA	NA	NA	HLA-A*29:02, HLA-B*15:01, HLA-B*15:04, HLA-B*35:05, HLA-B*35:11, HLA-B*35:43	0	0	0	1	1	0	3	0	2	0.587885
EpI_NSP14_78	HLA-I	NSP14	117	125	LVAVPTGYV	9	No	NA	NA	NA	NA	NA	NA	HLA-A*02:22, HLA-A*68:02, HLA-C*03:04, HLA-C*15:03	0	0	1	0	1	0	0	1	4	0.40803
EpI_NSP14_79	HLA-I	NSP14	117	124	LVAVPTGY	8	No	NA	NA	NA	NA	NA	NA	HLA-A*29:02, HLA-B*15:01, HLA-B*35:11, HLA-B*35:43	0	0	0	1	1	0	1	0	2	0.337885
EpI_NSP14_80	HLA-I	NSP14	124	133	YVDTPNNTDF	10	No	NA	NA	NA	NA	NA	NA	HLA-B*35:05, HLA-B*35:11, HLA-B*35:12, HLA-B*35:43, HLA-C*01:02, HLA-C*03:04, HLA-C*05:01, HLA-C*15:03, HLA-C*16:01	1	0	3	1	5	0	2	1	5	1.15056
EpI_NSP14_81	HLA-I	NSP14	126	135	DTPNNTDFSR	10	No	NA	NA	NA	NA	NA	NA	HLA-A*68:01	0	0	0	1	1	1	0	0	0	0.317647
EpI_NSP14_82	HLA-I	NSP14	127	136	TPNNTDFSRV	10	No	NA	NA	NA	NA	NA	NA	HLA-B*35:12	0	0	0	0	0	0	0	0	1	0.047619
EpI_NSP14_83	HLA-I	NSP14	130	139	NTDFSRVSAK	10	No	NA	NA	NA	NA	NA	NA	HLA-A*03:01, HLA-A*11:01, HLA-A*68:01	2	0	2	2	2	2	0	0	0	0.841643
EpI_NSP14_84	HLA-I	NSP14	130	138	NTDFSRVSA	9	No	NA	NA	NA	NA	NA	NA	HLA-A*68:02	0	0	0	0	0	0	0	0	1	0.047619
EpI_NSP14_85	HLA-I	NSP14	131	139	TDFSRVSAK	9	No	NA	NA	NA	NA	NA	NA	HLA-A*68:01	0	0	0	1	1	1	0	0	0	0.317647
EpI_NSP14_86	HLA-I	NSP14	137	147	SAKPPPGDQFK	11	No	NA	NA	NA	NA	NA	NA	HLA-A*11:01	1	0	1	0	0	0	0	0	0	0.103175
EpI_NSP14_87	HLA-I	NSP14	137	146	SAKPPPGDQF	10	No	NA	NA	NA	NA	NA	NA	HLA-B*15:01, HLA-B*15:04, HLA-B*35:05, HLA-B*35:11, HLA-B*35:43	0	0	0	0	1	0	3	0	2	0.529062
EpI_NSP14_88	HLA-I	NSP14	138	146	AKPPPGDQF	9	No	NA	NA	NA	NA	NA	NA	HLA-C*07:01	1	0	1	1	1	0	0	0	0	0.220822
EpI_NSP14_89	HLA-I	NSP14	144	154	DQFKHLIPLMY	11	No	NA	NA	NA	NA	NA	NA	HLA-A*29:02, HLA-B*18:01	1	0	0	2	0	0	0	0	0	0.173203
EpI_NSP14_90	HLA-I	NSP14	144	152	DQFKHLIPL	9	No	NA	NA	NA	NA	NA	NA	HLA-B*18:01, HLA-B*35:12, HLA-B*39:05, HLA-B*39:09, HLA-C*03:04	1	0	1	2	1	0	0	1	4	0.581232
EpI_NSP14_91	HLA-I	NSP14	145	154	QFKHLIPLMY	10	No	NA	NA	NA	NA	NA	NA	HLA-A*29:02	0	0	0	1	0	0	0	0	0	0.0588235
EpI_NSP14_92	HLA-I	NSP14	145	153	QFKHLIPLM	9	No	NA	NA	NA	NA	NA	NA	HLA-C*07:01	1	0	1	1	1	0	0	0	0	0.220822
EpI_NSP14_93	HLA-I	NSP14	146	154	FKHLIPLMY	9	No	NA	NA	NA	NA	NA	NA	HLA-A*29:02, HLA-C*06:02, HLA-C*07:01, HLA-C*07:02	3	0	3	4	3	0	0	1	1	0.880019
EpI_NSP14_94	HLA-I	NSP14	147	155	KHLIPLMYK	9	No	NA	NA	NA	NA	NA	NA	HLA-A*03:01, HLA-A*11:01, HLA-A*31:01	3	0	2	2	1	1	1	1	1	0.922106
EpI_NSP14_95	HLA-I	NSP14	148	157	HLIPLMYKGL	10	No	NA	NA	NA	NA	NA	NA	HLA-A*02:04, HLA-A*02:22	0	0	0	0	0	0	0	0	2	0.0952381
EpI_NSP14_96	HLA-I	NSP14	148	155	HLIPLMYK	8	No	NA	NA	NA	NA	NA	NA	HLA-A*03:01, HLA-A*11:01, HLA-A*68:01	2	0	2	2	2	2	0	0	0	0.841643
EpI_NSP14_97	HLA-I	NSP14	150	157	IPLMYKGL	8	No	NA	NA	NA	NA	NA	NA	HLA-B*08:01	1	0	1	0	0	0	0	0	0	0.103175
EpI_NSP14_98	HLA-I	NSP14	152	161	LMYKGLPWNV	10	Yes	NA	NA	NA	LMYKGLPWNV	38165	HLA-A*02:01, HLA-A*02:02, HLA-A*02:03, HLA-A*02:06	HLA-A*02:01, HLA-A*02:04, HLA-A*02:11, HLA-A*02:17, HLA-A*02:22	1	0	1	1	1	1	1	2	4	0.95852
EpI_NSP14_99	HLA-I	NSP14	153	161	MYKGLPWNV	9	Yes	NA	NA	NA	LMYKGLPWNV	38165	HLA-A*02:01, HLA-A*02:02, HLA-A*02:03, HLA-A*02:06	HLA-A*23:01, HLA-A*24:02, HLA-C*07:01	2	0	3	2	2	1	0	1	1	0.847993
EpI_NSP14_100	HLA-I	NSP14	153	162	MYKGLPWNVV	10	No	NA	NA	NA	NA	NA	NA	HLA-A*24:02	1	0	1	1	1	1	0	1	1	0.579552
EpI_NSP14_101	HLA-I	NSP14	153	163	MYKGLPWNVVR	11	No	NA	NA	NA	NA	NA	NA	HLA-A*31:01	1	0	0	1	0	0	1	1	1	0.398109
EpI_NSP14_102	HLA-I	NSP14	154	162	YKGLPWNVV	9	No	NA	NA	NA	NA	NA	NA	HLA-B*39:05, HLA-B*39:09	0	0	0	1	0	0	0	0	2	0.154062
EpI_NSP14_103	HLA-I	NSP14	155	163	KGLPWNVVR	9	No	NA	NA	NA	NA	NA	NA	HLA-A*31:01	1	0	0	1	0	0	1	1	1	0.398109
EpI_NSP14_104	HLA-I	NSP14	156	164	GLPWNVVRI	9	No	NA	NA	NA	NA	NA	NA	HLA-A*02:04, HLA-A*02:11, HLA-A*02:22, HLA-C*01:02	0	0	0	0	1	0	1	1	3	0.437792
EpI_NSP14_105	HLA-I	NSP14	156	165	GLPWNVVRIK	10	No	NA	NA	NA	NA	NA	NA	HLA-A*03:01	1	0	1	1	1	1	0	0	0	0.420822
EpI_NSP14_106	HLA-I	NSP14	157	166	LPWNVVRIKI	10	No	NA	NA	NA	NA	NA	NA	HLA-B*07:02	1	0	1	1	0	0	0	0	0	0.161998
EpI_NSP14_107	HLA-I	NSP14	157	164	LPWNVVRI	8	No	NA	NA	NA	NA	NA	NA	HLA-B*35:12, HLA-B*51:01	1	0	1	1	1	0	0	1	1	0.379552
EpI_NSP14_108	HLA-I	NSP14	161	169	VVRIKIVQM	9	No	NA	NA	NA	NA	NA	NA	HLA-B*15:04, HLA-B*35:11, HLA-B*35:43, HLA-C*01:02, HLA-C*03:04, HLA-C*07:01, HLA-C*15:03, HLA-C*16:01	1	0	3	1	5	0	2	1	4	1.10294
EpI_NSP14_109	HLA-I	NSP14	161	170	VVRIKIVQML	10	No	NA	NA	NA	NA	NA	NA	HLA-C*07:01	1	0	1	1	1	0	0	0	0	0.220822
EpI_NSP14_110	HLA-I	NSP14	162	170	VRIKIVQML	9	No	NA	NA	NA	NA	NA	NA	HLA-B*39:05, HLA-B*39:09, HLA-C*06:02, HLA-C*07:01	2	0	2	3	2	0	0	0	2	0.595705
EpI_NSP14_111	HLA-I	NSP14	162	169	VRIKIVQM	8	No	NA	NA	NA	NA	NA	NA	HLA-B*39:09, HLA-C*07:01	1	0	1	2	1	0	0	0	1	0.327264
EpI_NSP14_112	HLA-I	NSP14	165	175	KIVQMLSDTLK	11	Yes	NA	NA	NA	IVQMLSDTLK, VQMLSDTLK	29419, 70610	HLA-A*03:01, HLA-A*11:01, HLA-A*31:01, HLA-A*68:01	HLA-A*03:01, HLA-A*11:01	2	0	2	1	1	1	0	0	0	0.523996
EpI_NSP14_113	HLA-I	NSP14	166	175	IVQMLSDTLK	10	Yes	NA	NA	NA	IVQMLSDTLK, VQMLSDTLK	29419, 70610	HLA-A*03:01, HLA-A*11:01, HLA-A*31:01, HLA-A*68:01	HLA-A*03:01, HLA-A*11:01, HLA-A*68:01	2	0	2	2	2	2	0	0	0	0.841643
EpI_NSP14_114	HLA-I	NSP14	166	174	IVQMLSDTL	9	Yes	NA	NA	NA	IVQMLSDTLK	29419	HLA-A*03:01, HLA-A*11:01, HLA-A*31:01, HLA-A*68:01	HLA-B*35:12, HLA-C*01:02, HLA-C*03:04, HLA-C*15:03, HLA-C*16:01	0	0	2	0	3	0	0	1	4	0.573296
EpI_NSP14_115	HLA-I	NSP14	167	175	VQMLSDTLK	9	Yes	NA	NA	NA	IVQMLSDTLK, VQMLSDTLK	29419, 70610	HLA-A*03:01, HLA-A*11:01, HLA-A*31:01, HLA-A*68:01	HLA-A*03:01, HLA-A*11:01	2	0	2	1	1	1	0	0	0	0.523996
EpI_NSP14_116	HLA-I	NSP14	167	174	VQMLSDTL	8	Yes	NA	NA	NA	IVQMLSDTLK, VQMLSDTLK	29419, 70610	HLA-A*03:01, HLA-A*11:01, HLA-A*31:01, HLA-A*68:01	HLA-B*39:05, HLA-B*39:09	0	0	0	1	0	0	0	0	2	0.154062
EpI_NSP14_117	HLA-I	NSP14	168	177	QMLSDTLKNL	10	No	NA	NA	NA	NA	NA	NA	HLA-A*02:22	0	0	0	0	0	0	0	0	1	0.047619
EpI_NSP14_118	HLA-I	NSP14	169	177	MLSDTLKNL	9	No	NA	NA	NA	NA	NA	NA	HLA-A*02:01, HLA-A*02:04, HLA-A*02:11, HLA-A*02:17, HLA-A*02:22, HLA-B*15:04, HLA-C*01:02, HLA-C*03:04, HLA-C*06:02, HLA-C*07:01, HLA-C*15:03, HLA-C*16:01	3	0	5	3	6	1	2	3	7	2.05084
EpI_NSP14_119	HLA-I	NSP14	172	180	DTLKNLSDR	9	No	NA	NA	NA	NA	NA	NA	HLA-A*68:01	0	0	0	1	1	1	0	0	0	0.317647
EpI_NSP14_120	HLA-I	NSP14	172	181	DTLKNLSDRV	10	No	NA	NA	NA	NA	NA	NA	HLA-A*68:02	0	0	0	0	0	0	0	0	1	0.047619
EpI_NSP14_121	HLA-I	NSP14	173	181	TLKNLSDRV	9	No	NA	NA	NA	NA	NA	NA	HLA-A*02:22	0	0	0	0	0	0	0	0	1	0.047619
EpI_NSP14_122	HLA-I	NSP14	175	184	KNLSDRVVFV	10	No	NA	NA	NA	NA	NA	NA	HLA-A*02:04, HLA-A*02:22	0	0	0	0	0	0	0	0	2	0.0952381
EpI_NSP14_123	HLA-I	NSP14	176	184	NLSDRVVFV	9	No	NA	NA	NA	NA	NA	NA	HLA-A*02:01, HLA-A*02:04, HLA-A*02:11, HLA-A*02:17, HLA-A*02:22, HLA-A*68:02, HLA-C*01:02, HLA-C*06:02, HLA-C*07:01, HLA-C*15:03	3	0	3	3	4	1	1	2	7	1.60184
EpI_NSP14_124	HLA-I	NSP14	176	185	NLSDRVVFVL	10	No	NA	NA	NA	NA	NA	NA	HLA-A*02:01, HLA-A*02:04, HLA-A*02:11, HLA-A*02:22	1	0	1	1	1	1	1	2	3	0.910901
EpI_NSP14_125	HLA-I	NSP14	177	185	LSDRVVFVL	9	No	NA	NA	NA	NA	NA	NA	HLA-C*01:02, HLA-C*03:04, HLA-C*05:01, HLA-C*15:02, HLA-C*15:03, HLA-C*16:01	1	0	4	1	4	0	0	1	3	0.794118
EpI_NSP14_126	HLA-I	NSP14	178	186	SDRVVFVLW	9	Yes	NA	NA	NA	SDRVVFVLWA	57272	HLA-B*44:02, HLA-B*44:03, HLA-B*45:01	HLA-B*44:03	1	0	1	0	1	0	0	0	0	0.161998
EpI_NSP14_127	HLA-I	NSP14	180	188	RVVFVLWAH	9	No	NA	NA	NA	NA	NA	NA	HLA-A*31:01	1	0	0	1	0	0	1	1	1	0.398109
EpI_NSP14_128	HLA-I	NSP14	182	192	VFVLWAHGFEL	11	Yes	NA	NA	NA	VLWAHGFEL	69850	HLA-A*02:01, HLA-A*02:02, HLA-A*02:03, HLA-A*02:06, HLA-A*68:02, HLA-A*01:01, HLA-A*03:01, HLA-B*15:01, HLA-B*58:01, HLA-A*24:02. HLA-A*31:01, HLA-A*69:01, HLA-B*08:01	HLA-A*02:04	0	0	0	0	0	0	0	0	1	0.047619
EpI_NSP14_129	HLA-I	NSP14	182	190	VFVLWAHGF	9	No	NA	NA	NA	NA	NA	NA	HLA-A*23:01, HLA-A*24:02, HLA-A*29:02	1	0	2	2	1	1	0	1	1	0.685994
EpI_NSP14_130	HLA-I	NSP14	183	192	FVLWAHGFEL	10	Yes	NA	NA	NA	VLWAHGFEL	69850	HLA-A*02:01, HLA-A*02:02, HLA-A*02:03, HLA-A*02:06, HLA-A*68:02, HLA-A*01:01, HLA-A*03:01, HLA-B*15:01, HLA-B*58:01, HLA-A*24:02. HLA-A*31:01, HLA-A*69:01, HLA-B*08:01	HLA-A*02:01, HLA-A*02:04, HLA-A*02:11, HLA-A*02:22	1	0	1	1	1	1	1	2	3	0.910901
EpI_NSP14_131	HLA-I	NSP14	184	192	VLWAHGFEL	9	Yes	NA	NA	NA	VLWAHGFEL	69850	HLA-A*02:01, HLA-A*02:02, HLA-A*02:03, HLA-A*02:06, HLA-A*68:02, HLA-A*01:01, HLA-A*03:01, HLA-B*15:01, HLA-B*58:01, HLA-A*24:02. HLA-A*31:01, HLA-A*69:01, HLA-B*08:01	HLA-A*02:01, HLA-A*02:04, HLA-A*02:11, HLA-A*02:17, HLA-A*02:22, HLA-B*15:04, HLA-B*35:12, HLA-B*39:05, HLA-B*39:09, HLA-C*01:02, HLA-C*03:04, HLA-C*07:01, HLA-C*15:03, HLA-C*16:01	2	0	4	3	5	1	2	3	10	2.0317
EpI_NSP14_132	HLA-I	NSP14	184	193	VLWAHGFELT	10	Yes	NA	NA	NA	VLWAHGFEL	69850	HLA-A*02:01, HLA-A*02:02, HLA-A*02:03, HLA-A*02:06, HLA-A*68:02, HLA-A*01:01, HLA-A*03:01, HLA-B*15:01, HLA-B*58:01, HLA-A*24:02. HLA-A*31:01, HLA-A*69:01, HLA-B*08:01	HLA-A*02:04, HLA-A*02:11	0	0	0	0	0	0	1	1	1	0.28373
EpI_NSP14_133	HLA-I	NSP14	185	192	LWAHGFEL	8	Yes	NA	NA	NA	VLWAHGFEL	69850	HLA-A*02:01, HLA-A*02:02, HLA-A*02:03, HLA-A*02:06, HLA-A*68:02, HLA-A*01:01, HLA-A*03:01, HLA-B*15:01, HLA-B*58:01, HLA-A*24:02. HLA-A*31:01, HLA-A*69:01, HLA-B*08:01	HLA-A*02:04	0	0	0	0	0	0	0	0	1	0.047619
EpI_NSP14_134	HLA-I	NSP14	187	197	AHGFELTSMKY	11	Yes	NA	NA	NA	GFELTSMKY	19518	#NA	HLA-A*29:02	0	0	0	1	0	0	0	0	0	0.0588235
EpI_NSP14_135	HLA-I	NSP14	187	195	AHGFELTSM	9	No	NA	NA	NA	NA	NA	NA	HLA-B*39:05, HLA-B*39:09	0	0	0	1	0	0	0	0	2	0.154062
EpI_NSP14_136	HLA-I	NSP14	188	197	HGFELTSMKY	10	Yes	NA	NA	NA	GFELTSMKY	19518	#NA	HLA-A*29:02, HLA-B*15:01, HLA-B*15:04, HLA-B*35:01, HLA-B*35:05, HLA-B*35:11, HLA-B*35:43	1	0	1	2	1	0	3	1	2	0.860994
EpI_NSP14_137	HLA-I	NSP14	188	196	HGFELTSMK	9	No	NA	NA	NA	NA	NA	NA	HLA-A*68:01	0	0	0	1	1	1	0	0	0	0.317647
[truncated: 9,648 more rows]

## Sheet: HLA-I
Table S7: Predicted epitopes in SARS-Cov2 proteins using the South American alleles with WAF ≥ 0.05.
The experimental evidence, if available, is represented as the IEDB ID and experiment type. The number of alleles covered by country (abbreviated using the first three letters of their names) and coverage score are provided.
								Alleles with WAF ≥ 0.05 covered by country
ID	Type	Protein	Start	End	Peptide	Length	Exp_Evidence	ARG	BOL	BRA	CHI	COL	ECU	PAR	PER	VEN	SCORE
EpI_S_675	HLA-I	S	869	877	MIAQYTSAL	9	No	8	0	10	8	9	1	5	6	15	4.12659
EpI_NSP12_325	HLA-I	NSP12	442	450	FAQDGNAAI	9	No	8	0	12	8	10	1	4	6	12	4.01279
EpI_S_541	HLA-I	S	691	699	SIIAYTMSL	9	No	6	0	8	6	9	1	5	5	16	3.7391
EpI_NSP4_24	HLA-I	NSP4	25	33	YLITPVHVM	9	No	6	0	7	6	9	1	6	5	14	3.72124
EpI_S_236	HLA-I	S	269	277	YLQPRTFLL	9	No	6	0	8	6	8	2	3	6	14	3.64615
EpI_NSP16_84	HLA-I	NSP16	103	111	FVSDADSTL	9	No	6	0	11	7	9	1	3	4	13	3.43681
EpI_NSP2_315	HLA-I	NSP2	420	428	YITGGVVQL	9	No	5	0	8	6	9	1	5	4	12	3.38196
EpI_NSP12_695	HLA-I	NSP12	877	885	YADVFHLYL	9	Yes	6	0	11	7	8	1	3	5	10	3.34624
EpI_NSP13_257	HLA-I	NSP13	355	363	YVFCTVNAL	9	Yes	6	0	9	6	8	1	3	5	13	3.33504
EpI_NSP3_1458	HLA-I	NSP3	1776	1784	YVNTFSSTF	9	No	6	0	8	7	9	1	4	4	10	3.2761
EpI_NSP5_136	HLA-I	NSP5	219	227	FLNRFTTTL	9	Yes	6	0	9	6	8	1	3	4	13	3.22393
EpI_NSP3_1185	HLA-I	NSP3	1452	1460	YLNSTNVTI	9	No	5	0	7	6	9	1	3	4	14	3.17958
EpI_NSP3_692	HLA-I	NSP3	816	824	YYHTTDPSF	9	No	6	0	9	8	9	1	2	5	8	3.14841
EpI_N_131	HLA-I	N	266	274	KAYNVTQAF	9	No	6	0	9	5	8	0	5	4	9	3.02463
EpI_NSP16_4	HLA-I	NSP16	3	11	QAWQPGVAM	9	No	7	0	9	7	9	0	3	4	9	3.00665
EpI_S_690	HLA-I	S	886	894	WTFGAGAAL	9	No	5	0	9	6	9	0	4	3	12	2.99346
EpI_NSP1_65	HLA-I	NSP1	77	85	RTAPHGHVM	9	No	6	0	8	6	8	0	4	3	11	2.89496
EpI_NSP12_565	HLA-I	NSP12	741	749	FVNEFYAYL	9	No	5	0	8	6	9	1	1	4	12	2.88196
EpI_NSP2_57	HLA-I	NSP2	93	101	FVFPLNSII	9	No	5	0	7	5	7	1	3	4	11	2.86025
EpI_NSP13_208	HLA-I	NSP13	291	299	FAIGLALYY	9	Yes	6	0	9	7	8	1	3	3	6	2.83831
EpI_M_106	HLA-I	M	101	109	RLFARTRSM	9	No	7	0	8	5	8	0	3	4	10	2.83018
EpI_NSP14_336	HLA-I	NSP14	494	502	YLDAYNMMI	9	Yes	5	0	9	6	8	1	1	4	11	2.82313
EpI_ORF8_48	HLA-I	ORF8	73	81	YIDIGNYTV	9	No	4	0	6	5	7	1	3	4	12	2.80469
EpI_NSP3_795	HLA-I	NSP3	950	958	VMYMGTLSY	9	Yes	6	0	7	5	7	1	5	2	8	2.80072
EpI_E_1	HLA-I	E	4	12	FVSEETGTL	9	No	4	0	8	5	8	0	4	3	12	2.77264
EpI_ORF3a_31	HLA-I	ORF3a	33	41	ATIPIQASL	9	No	4	0	7	5	8	0	4	3	13	2.77264
EpI_NSP10_17	HLA-I	NSP10	19	27	FAVDAAKAY	9	No	5	0	7	6	7	1	5	3	5	2.77225
EpI_NSP12_90	HLA-I	NSP12	123	131	TMADLVYAL	9	Yes	3	0	5	4	6	1	4	4	13	2.75649
EpI_NSP3_34	HLA-I	NSP3	42	50	YTVELGTEV	9	No	3	0	6	4	7	1	4	3	13	2.75182
EpI_S_567	HLA-I	S	718	726	FTISVTTEI	9	No	3	0	6	3	6	1	5	3	12	2.71155
EpI_ORF10_7	HLA-I	ORF10	5	13	NVFAFPFTI	9	No	3	0	5	4	6	2	2	4	13	2.70649
EpI_S_130	HLA-I	S	160	168	YSSANNCTF	9	No	6	0	9	5	8	0	4	3	7	2.69328
EpI_NSP3_601	HLA-I	NSP3	718	726	YYTSNPTTF	9	No	4	0	7	6	8	1	3	3	8	2.66837
EpI_NSP3_248	HLA-I	NSP3	336	344	FGADPIHSL	9	No	4	0	7	5	7	0	4	3	12	2.6662
EpI_NSP10_23	HLA-I	NSP10	30	38	YLASGGQPI	9	No	3	0	7	4	7	1	2	4	13	2.66055
EpI_NSP12_718	HLA-I	NSP12	898	906	HMLDMYSVM	9	Yes	3	0	5	3	5	1	4	4	12	2.59122
EpI_NSP14_344	HLA-I	NSP14	500	508	MMISAGFSL	9	Yes	2	0	5	4	6	1	4	3	13	2.58982
EpI_E_49	HLA-I	E	57	65	YVYSRVKNL	9	No	4	0	6	4	7	0	5	3	10	2.58952
EpI_NSP3_725	HLA-I	NSP3	857	865	YLATALLTL	9	No	3	0	5	4	7	1	3	3	13	2.5792
EpI_NSP4_233	HLA-I	NSP4	284	292	IVAGGIVAI	9	No	2	0	4	3	6	1	5	3	12	2.56076
EpI_S_744	HLA-I	S	951	959	VVNQNAQAL	9	No	4	0	7	5	8	0	4	3	8	2.53455
EpI_NSP3_75	HLA-I	NSP3	88	96	YLFDESGEF	9	No	2	0	6	4	5	0	6	3	11	2.53338
EpI_ORF3a_190	HLA-I	ORF3a	207	215	FTSDYYQLY	9	No	6	0	7	6	8	1	3	2	5	2.52551
EpI_ORF6_5	HLA-I	ORF6	3	11	HLVDFQVTI	9	Yes	3	0	6	4	6	1	3	3	12	2.52038
EpI_NSP3_1051	HLA-I	NSP3	1281	1289	YVDNSSLTI	9	No	3	0	7	4	7	0	4	3	11	2.5042
EpI_NSP6_129	HLA-I	NSP6	114	122	VMYASAVVL	9	No	3	0	5	4	6	1	3	3	12	2.47276
EpI_NSP6_53	HLA-I	NSP6	50	58	IAMSAFAMM	9	No	5	0	7	4	7	0	4	3	8	2.47246
EpI_NSP3_1049	HLA-I	NSP3	1279	1287	AAYVDNSSL	9	No	4	0	7	5	8	0	4	2	9	2.47106
EpI_ORF8_17	HLA-I	ORF8	31	39	YVVDDPCPI	9	No	3	0	7	3	6	1	3	3	11	2.46155
EpI_NSP3_655	HLA-I	NSP3	768	776	MSMTYGQQF	9	No	3	0	6	4	6	1	4	3	8	2.4549
EpI_NSP16_12	HLA-I	NSP16	9	17	VAMPNLYKM	9	No	5	0	7	5	7	0	3	3	9	2.4539
EpI_NSP8_64	HLA-I	NSP8	62	70	MADQAMTQM	9	Yes	4	0	9	5	7	0	3	3	8	2.44596
EpI_NSP3_1454	HLA-I	NSP3	1772	1780	MFDAYVNTF	9	No	3	0	6	4	7	1	3	3	9	2.43634
EpI_S_693	HLA-I	S	892	900	AALQIPFAM	9	No	3	0	6	4	6	0	5	3	9	2.42752
EpI_NSP3_1274	HLA-I	NSP3	1554	1562	VQMAPISAM	9	No	2	0	4	3	6	0	6	2	13	2.42227
EpI_NSP16_48	HLA-I	NSP16	53	61	YLNTLTLAV	9	Yes	4	0	6	5	7	1	1	4	9	2.41183
EpI_NSP6_180	HLA-I	NSP6	156	164	NALDQAISM	9	No	5	0	7	5	7	0	3	3	8	2.40628
EpI_NSP13_127	HLA-I	NSP13	209	217	VVYRGTTTY	9	Yes	5	0	7	5	7	1	3	2	6	2.39993
EpI_NSP16_182	HLA-I	NSP16	222	230	YVMHANYIF	9	No	3	0	6	5	6	1	3	3	8	2.38873
EpI_NSP4_296	HLA-I	NSP4	337	345	FLPGVYSVI	9	No	3	0	5	3	6	2	1	4	10	2.37981
EpI_NSP7_27	HLA-I	NSP7	41	49	LAKDTTEAF	9	No	5	0	7	4	7	0	4	3	6	2.37722
EpI_S_217	HLA-I	S	258	266	WTAGAAAYY	9	No	5	0	6	7	7	1	3	2	4	2.37472
EpI_NSP3_1525	HLA-I	NSP3	1885	1893	VAKSHNIAL	9	No	5	0	7	4	7	0	4	2	8	2.36134
EpI_NSP4_272	HLA-I	NSP4	314	322	VVAFNTLLF	9	No	3	0	6	4	6	1	4	3	6	2.35966
EpI_NSP12_246	HLA-I	NSP12	334	342	FVDGVPFVV	9	Yes	3	0	6	4	6	1	2	3	11	2.34776
EpI_NSP3_1109	HLA-I	NSP3	1351	1359	MPYFFTLLL	9	No	5	0	7	5	6	0	3	3	8	2.34746
EpI_NSP4_64	HLA-I	NSP4	82	90	YTNDKACPL	9	No	6	0	10	5	9	0	0	3	8	2.34734
EpI_NSP3_1106	HLA-I	NSP3	1350	1358	YMPYFFTLL	9	No	3	0	5	4	6	2	1	4	8	2.34339
EpI_NSP12_720	HLA-I	NSP12	899	907	MLDMYSVML	9	No	3	0	6	4	6	1	1	4	11	2.33387
EpI_NSP6_116	HLA-I	NSP6	97	105	WLDMVDTSL	9	No	3	0	7	4	6	1	1	4	10	2.33387
EpI_NSP14_325	HLA-I	NSP14	487	495	HANEYRLYL	9	No	4	0	7	5	8	0	2	3	9	2.33217
EpI_S_705	HLA-I	S	898	906	FAMQMAYRF	9	No	3	0	6	4	6	1	3	3	8	2.3299
EpI_NSP4_456	HLA-I	NSP4	486	494	LYQPPQTSI	9	Yes	5	0	7	5	8	1	0	4	6	2.30598
EpI_ORF3a_150	HLA-I	ORF3a	139	147	LLYDANYFL	9	No	2	0	5	3	5	1	3	3	12	2.29956
EpI_NSP6_108	HLA-I	NSP6	86	94	MPASWVMRI	9	Yes	4	0	6	5	6	0	3	3	9	2.2919
EpI_M_167	HLA-I	M	170	178	VATSRTLSY	9	Yes	5	0	6	5	6	0	4	3	5	2.28198
EpI_NSP4_261	HLA-I	NSP4	309	317	GEYSHVVAF	9	No	3	0	3	3	5	1	6	1	9	2.26979
EpI_NSP8_127	HLA-I	NSP8	145	153	TTFTYASAL	9	No	4	0	5	4	7	0	4	2	9	2.25817
EpI_N_160	HLA-I	N	307	315	FAPSASAFF	9	Yes	4	0	7	4	7	0	3	3	7	2.24428
EpI_NSP12_286	HLA-I	NSP12	381	389	HAASGNLLL	9	No	4	0	7	5	7	0	3	2	8	2.23961
EpI_NSP12_341	HLA-I	NSP12	455	463	YYRYNLPTM	9	Yes	5	0	7	5	7	1	1	3	5	2.21342
EpI_NSP6_77	HLA-I	NSP6	70	78	FLLPSLATV	9	Yes	3	0	5	4	6	1	2	3	9	2.2049
EpI_NSP4_251	HLA-I	NSP4	300	308	YFMRFRRAF	9	No	6	0	8	6	7	1	0	3	4	2.2028
EpI_NSP5_173	HLA-I	NSP5	254	262	SAQTGIAVL	9	No	3	0	5	4	7	0	4	2	9	2.20261
EpI_M_32	HLA-I	M	37	45	FAYANRNRF	9	No	4	0	5	4	6	0	4	2	9	2.19935
EpI_N_183	HLA-I	N	331	339	LTYTGAIKL	9	No	3	0	6	3	7	0	4	2	9	2.19141
EpI_NSP12_670	HLA-I	NSP12	854	862	LMIERFVSL	9	Yes	3	0	5	3	5	1	2	3	11	2.18249
EpI_NSP14_277	HLA-I	NSP14	418	426	SLYVNKHAF	9	No	4	0	6	4	7	0	3	2	9	2.18079
EpI_NSP2_195	HLA-I	NSP2	299	307	SFSASTSAF	9	No	4	0	6	5	6	1	2	3	5	2.17642
EpI_NSP3_1102	HLA-I	NSP3	1349	1357	NYMPYFFTL	9	No	3	0	6	4	6	1	1	3	10	2.17514
EpI_NSP4_292	HLA-I	NSP4	336	344	SFLPGVYSV	9	No	3	0	6	4	6	1	1	3	10	2.17514
EpI_NSP3_46	HLA-I	NSP3	57	65	VADAVIKTL	9	No	3	0	7	4	7	0	3	2	9	2.17285
EpI_NSP7_33	HLA-I	NSP7	47	55	EAFEKMVSL	9	Yes	3	0	6	4	7	0	3	2	10	2.17285
EpI_NSP12_202	HLA-I	NSP12	281	289	KLFDRYFKY	9	No	4	0	4	4	4	1	5	2	5	2.1686
EpI_S_829	HLA-I	S	1060	1068	VVFLHVTYV	9	Yes	3	0	5	3	6	1	2	3	9	2.14608
EpI_N_158	HLA-I	N	306	314	QFAPSASAF	9	No	4	0	6	5	6	1	3	2	4	2.14269
EpI_NSP3_516	HLA-I	NSP3	619	627	TLNDLNETL	9	No	2	0	4	3	6	1	2	3	11	2.13814
EpI_NSP3_176	HLA-I	NSP3	239	247	VVNAANVYL	9	No	2	0	4	3	6	0	5	2	9	2.10679
EpI_NSP3_339	HLA-I	NSP3	444	452	NLHPDSATL	9	No	2	0	4	3	6	0	5	2	9	2.10679
EpI_NSP13_88	HLA-I	NSP13	157	165	VLSDRELHL	9	No	3	0	6	3	6	1	2	3	7	2.09846
EpI_NSP2_329	HLA-I	NSP2	439	447	TVYEKLKPV	9	No	3	0	5	3	6	1	2	3	8	2.09846
EpI_NSP3_1259	HLA-I	NSP3	1533	1541	FSYFAVHFI	9	No	3	0	5	3	6	1	2	3	8	2.09846
EpI_S_727	HLA-I	S	923	931	IANQFNSAI	9	No	4	0	8	3	7	0	4	1	6	2.08824
EpI_NSP2_385	HLA-I	NSP2	500	508	KLVNKFLAL	9	No	3	0	5	3	5	1	2	3	9	2.08725
EpI_NSP2_489	HLA-I	NSP2	627	635	MVTNNTFTL	9	No	2	0	4	3	5	0	4	3	10	2.0817
EpI_NSP13_300	HLA-I	NSP13	397	405	VYIGDPAQL	9	Yes	4	0	7	5	7	1	0	3	6	2.08049
EpI_NSP14_215	HLA-I	NSP14	321	329	LLADKFPVL	9	No	2	0	4	3	5	1	2	3	11	2.07932
EpI_NSP6_213	HLA-I	NSP6	184	192	FLARGIVFM	9	No	2	0	4	3	5	1	2	3	11	2.07932
EpI_NSP13_334	HLA-I	NSP13	448	456	IVDTVSALV	9	Yes	3	0	5	3	5	1	1	4	9	2.07337
EpI_NSP12_381	HLA-I	NSP12	519	527	MSYEDQDAL	9	No	3	0	7	4	6	0	3	2	8	2.06641
EpI_NSP14_118	HLA-I	NSP14	169	177	MLSDTLKNL	9	No	3	0	5	3	6	1	2	3	7	2.05084
EpI_NSP4_225	HLA-I	NSP4	276	284	GALDISASI	9	No	2	0	5	2	5	1	3	3	8	2.05026
EpI_NSP4_421	HLA-I	NSP4	439	447	TQYNRYLAL	9	Yes	2	0	4	2	5	1	4	1	11	2.04827
EpI_NSP13_298	HLA-I	NSP13	396	405	YVYIGDPAQL	10	Yes	2	0	4	3	6	1	2	3	9	2.0429
EpI_S_695	HLA-I	S	894	902	LQIPFAMQM	9	Yes	1	0	4	2	5	0	6	1	11	2.04272
EpI_N_111	HLA-I	N	222	230	LLLDRLNQL	9	Yes	3	0	5	3	5	1	2	3	8	2.03964
EpI_NSP12_622	HLA-I	NSP12	786	794	LYYQNNVFM	9	No	4	0	7	5	7	1	0	3	5	2.03287
EpI_NSP4_320	HLA-I	NSP4	352	360	YLTNDVSFL	9	No	3	0	5	4	6	1	1	3	8	2.03228
EpI_NSP14_131	HLA-I	NSP14	184	192	VLWAHGFEL	9	Yes	2	0	4	3	5	1	2	3	10	2.0317
EpI_NSP15_199	HLA-I	NSP15	243	251	SQLGGLHLL	9	No	2	0	4	3	5	1	2	3	10	2.0317
EpI_S_364	HLA-I	S	417	425	KIADYNYKL	9	No	2	0	5	3	5	1	2	3	9	2.0317
EpI_NSP3_829	HLA-I	NSP3	988	996	MMSAPPAQY	9	No	4	0	5	5	6	1	3	1	5	2.03158
EpI_NSP12_511	HLA-I	NSP12	666	674	MVMCGGSLY	9	Yes	4	0	5	5	5	2	3	1	2	2.0299
EpI_NSP3_1297	HLA-I	NSP3	1566	1574	YIFFASFYY	9	Yes	4	0	5	5	5	2	3	1	2	2.0299
EpI_S_563	HLA-I	S	712	720	IAIPTNFTI	9	No	2	0	6	3	6	0	4	1	10	2.01354
EpI_NSP3_1160	HLA-I	NSP3	1424	1432	SLIYSTAAL	9	No	1	0	3	2	5	1	2	3	13	2.01256
EpI_NSP2_245	HLA-I	NSP2	356	364	FASEAARVV	9	No	4	0	8	3	7	0	3	1	7	2.01085
EpI_NSP3_1286	HLA-I	NSP3	1560	1568	SAMVRMYIF	9	No	3	0	6	2	5	1	3	3	5	2.01057
EpI_NSP4_396	HLA-I	NSP4	420	428	FLLNKEMYL	9	Yes	3	0	6	3	5	1	1	3	9	2.00987
EpI_S_538	HLA-I	S	687	695	VASQSIIAY	9	No	4	0	5	4	6	0	4	2	5	2.00887
EpI_NSP2_485	HLA-I	NSP2	625	633	NMMVTNNTF	9	No	1	0	4	2	5	1	4	2	9	2.00859
EpI_NSP8_120	HLA-I	NSP8	130	138	VVIPDYNTY	9	No	3	0	5	3	5	0	5	2	6	2.00829
EpI_S_880	HLA-I	S	1137	1145	VYDPLQPEL	9	Yes	3	0	5	4	6	1	0	3	10	2.00252
EpI_NSP4_204	HLA-I	NSP4	247	255	YYRSLPGVF	9	No	5	0	6	6	6	1	0	3	4	1.99318
EpI_NSP8_78	HLA-I	NSP8	84	92	TSAMQTMLF	9	No	2	0	4	2	5	1	4	3	5	1.98478
EpI_NSP12_168	HLA-I	NSP12	239	247	SLLMPILTL	9	No	2	0	4	3	5	1	2	3	9	1.98408
EpI_S_764	HLA-I	S	976	984	VLNDILSRL	9	Yes	2	0	4	3	5	1	2	3	9	1.98408
EpI_NSP3_1488	HLA-I	NSP3	1807	1815	SLDNVLSTF	9	No	2	0	4	3	6	0	4	2	9	1.98179
EpI_S_17	HLA-I	S	28	36	YTNSFTRGV	9	No	4	0	5	3	6	1	1	3	7	1.9814
EpI_NSP3_1201	HLA-I	NSP3	1483	1491	YPSLETIQI	9	No	3	0	5	4	5	0	3	3	7	1.97584
EpI_S_566	HLA-I	S	714	722	IPTNFTISV	9	No	3	0	5	4	5	0	3	3	7	1.97584
EpI_NSP15_24	HLA-I	NSP15	34	42	KVDGVDVEL	9	No	3	0	7	4	6	0	1	3	9	1.97514
EpI_S_90	HLA-I	S	109	117	TLDSKTQSL	9	No	3	0	7	4	6	0	1	3	9	1.97514
EpI_ORF3a_196	HLA-I	ORF3a	211	219	YYQLYSTQL	9	No	4	0	6	5	6	1	0	3	6	1.97404
EpI_NSP4_159	HLA-I	NSP4	186	194	RPDTRYVLM	9	Yes	3	0	5	4	6	0	3	2	8	1.97117
EpI_S_280	HLA-I	S	327	335	VRFPNITNL	9	Yes	3	0	5	4	6	0	3	2	8	1.97117
EpI_NSP4_451	HLA-I	NSP4	478	486	FSNSGSDVL	9	No	2	0	7	3	5	0	4	2	7	1.97059
EpI_NSP16_66	HLA-I	NSP16	77	85	GVAPGTAVL	9	Yes	3	0	5	4	6	0	3	1	10	1.9553
EpI_M_37	HLA-I	M	39	47	YANRNRFLY	9	No	3	0	5	4	6	0	4	2	5	1.95331
EpI_NSP4_97	HLA-I	NSP4	118	126	FLHFLPRVF	9	No	3	0	5	3	7	0	4	2	5	1.95331
EpI_NSP4_141	HLA-I	NSP4	174	182	NVLEGSVAY	9	No	2	0	4	4	5	1	4	2	4	1.9437
EpI_NSP4_270	HLA-I	NSP4	313	321	HVVAFNTLL	9	No	1	0	3	2	5	0	5	2	10	1.93359
EpI_NSP3_1245	HLA-I	NSP3	1521	1529	YVLGLAAIM	9	No	2	0	5	2	5	0	4	3	7	1.92764
EpI_S_64	HLA-I	S	78	86	RFDNPVLPF	9	No	4	0	7	4	7	1	0	3	4	1.92642
EpI_NSP3_618	HLA-I	NSP3	733	741	ITFDNLKTL	9	No	3	0	4	3	6	0	4	1	9	1.92624
EpI_M_75	HLA-I	M	65	73	FVLAAVYRI	9	Yes	2	0	4	2	5	1	2	3	9	1.92526
EpI_ORF3a_82	HLA-I	ORF3a	87	95	FVTVYSHLL	9	No	2	0	4	2	5	1	2	3	9	1.92526
EpI_ORF3a_85	HLA-I	ORF3a	89	97	TVYSHLLLV	9	No	2	0	4	2	5	1	2	3	9	1.92526
EpI_M_165	HLA-I	M	169	178	TVATSRTLSY	10	Yes	4	0	4	5	4	2	3	1	2	1.92346
EpI_ORF3a_115	HLA-I	ORF3a	107	115	YLYALVYFL	9	No	2	0	4	4	5	1	1	3	9	1.9179
EpI_N_83	HLA-I	N	159	167	LQLPQGTTL	9	Yes	1	0	4	2	5	0	5	1	11	1.91772
EpI_NSP13_114	HLA-I	NSP13	192	200	KVQIGEYTF	9	No	2	0	4	2	5	1	3	3	6	1.9074
EpI_NSP3_652	HLA-I	NSP3	764	772	QVVDMSMTY	9	No	3	0	4	4	4	1	5	1	3	1.9067
EpI_NSP1_75	HLA-I	NSP1	84	92	VMVELVAEL	9	No	1	0	3	2	4	1	2	3	12	1.90612
EpI_NSP3_837	HLA-I	NSP3	990	998	SAPPAQYEL	9	No	2	0	4	3	6	0	3	2	10	1.90441
EpI_NSP12_451	HLA-I	NSP12	593	601	KFYGGWHNM	9	No	3	0	5	3	5	1	2	3	5	1.89678
EpI_NSP13_314	HLA-I	NSP13	420	428	EYFNSVCRL	9	Yes	5	0	5	6	5	1	0	3	4	1.88674
EpI_NSP4_304	HLA-I	NSP4	340	348	GVYSVIYLY	9	No	3	0	4	4	5	2	4	0	2	1.88179
EpI_NSP15_135	HLA-I	NSP15	181	189	KVDGVVQQL	9	No	3	0	6	4	6	0	1	3	8	1.8799
EpI_NSP3_362	HLA-I	NSP3	460	468	FLKKDAPYI	9	No	2	0	4	2	5	1	2	3	8	1.87764
EpI_NSP3_640	HLA-I	NSP3	748	756	RTIKVFTTV	9	No	2	0	4	2	5	1	2	3	8	1.87764
EpI_NSP12_727	HLA-I	NSP12	907	915	LTNDNTSRY	9	Yes	4	0	5	5	5	1	3	1	3	1.87752
EpI_NSP14_161	HLA-I	NSP14	229	237	HSIGFDYVY	9	No	2	0	4	4	5	1	3	2	5	1.86632
EpI_NSP4_309	HLA-I	NSP4	343	351	SVIYLYLTF	9	No	2	0	5	3	4	1	3	3	4	1.85978
EpI_NSP12_392	HLA-I	NSP12	528	536	FAYTKRNVI	9	No	4	0	6	3	6	0	3	1	7	1.85679
EpI_NSP12_398	HLA-I	NSP12	534	542	NVIPTITQM	9	No	2	0	5	3	5	0	3	2	9	1.84559
EpI_NSP6_132	HLA-I	NSP6	115	123	MYASAVVLL	9	No	3	0	6	4	6	1	0	2	8	1.84379
EpI_NSP6_136	HLA-I	NSP6	116	124	YASAVVLLI	9	No	4	0	6	3	6	0	2	2	7	1.8429
EpI_S_853	HLA-I	S	1095	1103	FVSNGTHWF	9	No	3	0	4	3	5	0	4	2	6	1.83567
EpI_NSP8_46	HLA-I	NSP8	47	55	SEFDRDAAM	9	Yes	3	0	2	3	4	1	5	0	7	1.832
EpI_NSP12_748	HLA-I	NSP12	923	931	AMYTPHTVL	9	No	2	0	4	3	5	0	2	3	10	1.8317
EpI_NSP9_43	HLA-I	NSP9	58	66	KSDGTGTIY	9	Yes	4	0	6	4	7	0	3	1	4	1.83158
EpI_ORF3a_35	HLA-I	ORF3a	39	47	ASLPFGWLI	9	No	2	0	5	2	5	1	2	3	6	1.83002
EpI_NSP3_328	HLA-I	NSP3	430	438	FLTENLLLY	9	No	3	0	5	4	6	0	3	2	5	1.82831
EpI_NSP12_703	HLA-I	NSP12	883	891	LYLQYIRKL	9	No	5	0	6	5	5	1	0	3	3	1.82792
EpI_NSP15_144	HLA-I	NSP15	192	200	TYFTQSRNL	9	No	5	0	6	5	5	1	0	3	3	1.82792
EpI_S_116	HLA-I	S	144	152	YYHKNNKSW	9	No	5	0	6	5	5	1	0	3	3	1.82792
EpI_NSP8_14	HLA-I	NSP8	7	15	SSLPSYAAF	9	No	2	0	4	3	5	0	4	2	7	1.82773
EpI_NSP3_1358	HLA-I	NSP3	1651	1659	VARDLSLQF	9	No	3	0	4	2	5	0	4	2	7	1.82446
EpI_NSP3_817	HLA-I	NSP3	980	988	VQQESPFVM	9	No	1	0	3	2	5	0	5	1	10	1.82248
EpI_NSP12_354	HLA-I	NSP12	471	479	FVVEVVDKY	9	No	2	0	4	4	5	1	3	2	4	1.8187
EpI_S_152	HLA-I	S	192	200	FVFKNIDGY	9	No	2	0	4	4	5	1	3	2	4	1.8187
EpI_S_699	HLA-I	S	896	904	IPFAMQMAY	9	No	3	0	4	4	4	0	5	2	3	1.81781
EpI_NSP4_164	HLA-I	NSP4	192	201	VLMDGSIIQF	10	No	2	0	3	2	3	2	2	3	6	1.81713
EpI_S_822	HLA-I	S	1054	1062	QSAPHGVVF	9	No	2	0	5	2	5	0	4	2	7	1.81653
EpI_NSP12_377	HLA-I	NSP12	513	521	RLYYDSMSY	9	Yes	4	0	5	4	6	1	3	0	4	1.81403
EpI_NSP16_73	HLA-I	NSP16	86	94	RQWLPTGTL	9	No	2	0	4	3	6	1	1	2	9	1.80679
EpI_NSP4_165	HLA-I	NSP4	193	201	LMDGSIIQF	9	No	1	0	3	3	5	0	4	1	11	1.80392
EpI_S_904	HLA-I	S	1185	1193	RLNEVAKNL	9	Yes	3	0	5	3	6	0	2	3	6	1.80322
EpI_NSP3_1311	HLA-I	NSP3	1574	1582	YVWKSYVHV	9	No	2	0	4	2	5	1	1	3	9	1.80026
EpI_S_167	HLA-I	S	204	212	YSKHTPINL	9	No	3	0	6	3	7	0	2	2	6	1.79855
EpI_NSP16_120	HLA-I	NSP16	161	169	LALGGSVAI	9	No	2	0	6	3	5	0	3	2	7	1.79797
EpI_S_186	HLA-I	S	221	229	SALEPLVDL	9	No	2	0	5	3	5	0	3	2	8	1.79797
EpI_NSP15_28	HLA-I	NSP15	41	49	ELFENKTTL	9	No	2	0	4	3	6	0	3	1	10	1.7933
EpI_NSP4_338	HLA-I	NSP4	367	375	VMFTPLVPF	9	No	1	0	4	2	5	1	3	2	7	1.78835
EpI_NSP4_168	HLA-I	NSP4	197	205	SIIQFPNTY	9	Yes	3	0	5	3	5	0	4	2	4	1.78805
EpI_NSP1_31	HLA-I	NSP1	38	46	VLSEARQHL	9	No	2	0	4	2	5	1	2	3	6	1.7824
EpI_NSP14_331	HLA-I	NSP14	492	500	RLYLDAYNM	9	No	2	0	4	2	5	1	2	3	6	1.7824
EpI_NSP12_161	HLA-I	NSP12	233	241	VVDSYYSLL	9	No	3	0	6	3	6	0	1	3	7	1.77346
EpI_NSP6_95	HLA-I	NSP6	78	86	VAYFNMVYM	9	No	3	0	4	2	6	0	4	1	7	1.77218
EpI_NSP2_179	HLA-I	NSP2	288	296	KLNEEIAII	9	No	2	0	3	2	4	1	2	3	8	1.7712
EpI_ORF10_1	HLA-I	ORF10	1	9	MGYINVFAF	9	No	2	0	5	2	5	0	4	2	6	1.76891
EpI_NSP3_1088	HLA-I	NSP3	1323	1331	YAKPFLNKV	9	No	2	0	4	2	6	0	4	1	8	1.76424
EpI_NSP16_227	HLA-I	NSP16	266	274	QINDMILSL	9	No	1	0	3	2	5	0	4	2	9	1.76097
EpI_S_769	HLA-I	S	983	991	RLDKVEAEV	9	Yes	3	0	4	3	4	1	1	3	7	1.76057
EpI_NSP3_1222	HLA-I	NSP3	1505	1513	LVAEWFLAY	9	No	4	0	5	4	4	1	3	1	3	1.75987
EpI_NSP6_101	HLA-I	NSP6	84	92	VYMPASWVM	9	No	2	0	5	4	5	1	1	2	7	1.75917
EpI_N_221	HLA-I	N	403	411	FSKQLQQSM	9	No	4	0	6	2	6	0	3	1	6	1.75035
EpI_NSP12_254	HLA-I	NSP12	340	348	FVVSTGYHF	9	Yes	2	0	5	3	5	0	3	2	7	1.75035
EpI_NSP12_299	HLA-I	NSP12	399	407	AALTNNVAF	9	No	2	0	4	3	5	0	3	2	8	1.75035
EpI_NSP14_22	HLA-I	NSP14	49	57	MTYRRLISM	9	No	4	0	5	2	6	0	3	1	7	1.75035
EpI_NSP12_591	HLA-I	NSP12	758	766	LSDDAVVCF	9	No	4	0	7	4	5	0	2	2	4	1.74767
EpI_NSP12_578	HLA-I	NSP12	748	756	YLRKHFSMM	9	No	3	0	5	2	5	0	3	2	7	1.74708
EpI_ORF10_17	HLA-I	ORF10	9	17	FPFTIYSLL	9	No	3	0	5	3	4	0	3	2	7	1.74708
EpI_ORF3a_106	HLA-I	ORF3a	103	111	APFLYLYAL	9	No	3	0	5	3	4	0	3	2	7	1.74708
EpI_NSP8_144	HLA-I	NSP8	161	169	DADSKIVQL	9	No	2	0	5	3	6	0	3	1	8	1.74568
EpI_NSP3_510	HLA-I	NSP3	612	620	TVASLINTL	9	No	1	0	3	2	5	0	4	1	11	1.7451
EpI_NSP12_545	HLA-I	NSP12	715	723	IADKYVRNL	9	No	3	0	7	3	6	0	2	2	5	1.73973
EpI_NSP4_30	HLA-I	NSP4	31	39	HVMSKHTDF	9	No	3	0	5	2	5	0	4	2	4	1.72923
EpI_ORF3a_183	HLA-I	ORF3a	204	212	HSYFTSDYY	9	No	3	0	4	5	5	1	3	1	2	1.72673
EpI_NSP3_351	HLA-I	NSP3	452	460	LVSDIDITF	9	No	2	0	4	2	5	0	4	2	6	1.72129
EpI_M_206	HLA-I	M	212	220	SSSDNIALL	9	No	3	0	6	4	7	0	1	1	8	1.7165
EpI_NSP13_293	HLA-I	NSP13	390	398	RLRAKHYVY	9	No	4	0	4	4	4	1	3	1	3	1.71225
EpI_NSP12_264	HLA-I	NSP12	360	368	NLHSSRLSF	9	No	3	0	5	2	6	0	3	2	5	1.71067
EpI_NSP13_21	HLA-I	NSP13	57	65	VTDVTQLYL	9	No	4	0	7	4	7	0	0	2	6	1.71055
EpI_NSP6_119	HLA-I	NSP6	100	108	MVDTSLSGF	9	No	2	0	4	2	5	0	3	3	6	1.7074
EpI_NSP2_164	HLA-I	NSP2	265	273	GLNDNLLEI	9	No	2	0	4	2	5	1	1	3	7	1.70502
EpI_NSP7_8	HLA-I	NSP7	12	20	VLLSVLQQL	9	No	1	0	4	1	4	1	2	3	8	1.70444
EpI_S_405	HLA-I	S	464	472	FERDISTEI	9	No	2	0	2	3	3	1	4	1	7	1.70373
EpI_NSP13_144	HLA-I	NSP13	225	233	FVLTSHTVM	9	No	2	0	4	3	5	0	3	2	7	1.70273
EpI_NSP15_33	HLA-I	NSP15	47	55	TTLPVNVAF	9	Yes	2	0	4	3	5	0	3	2	7	1.70273
EpI_S_73	HLA-I	S	84	92	LPFNDGVYF	9	No	2	0	4	3	5	0	3	2	7	1.70273
EpI_S_536	HLA-I	S	686	695	SVASQSIIAY	10	No	3	0	3	4	3	2	3	1	2	1.70264
EpI_NSP6_220	HLA-I	NSP6	199	207	IFFITGNTL	9	No	2	0	5	3	5	1	1	2	7	1.70035
EpI_NSP3_154	HLA-I	NSP3	208	216	NSFSGYLKL	9	No	1	0	4	2	5	0	4	1	9	1.69748
EpI_NSP3_677	HLA-I	NSP3	801	809	YVLPNDDTL	9	No	1	0	4	2	5	0	4	1	9	1.69748
EpI_NSP12_277	HLA-I	NSP12	374	382	YAADPAMHA	9	No	3	0	5	2	6	0	3	1	7	1.69479
EpI_NSP3_1471	HLA-I	NSP3	1786	1794	VPMEKLKTL	9	No	3	0	5	3	5	0	3	1	7	1.69479
EpI_NSP4_347	HLA-I	NSP4	373	381	VPFWITIAY	9	No	3	0	4	4	4	0	4	2	3	1.69281
EpI_NSP6_30	HLA-I	NSP6	36	45	FLYENAFLPF	10	No	2	0	3	3	2	2	1	3	6	1.69213
EpI_S_201	HLA-I	S	236	244	TRFQTLLAL	9	No	3	0	5	4	5	0	2	2	6	1.69211
EpI_S_20	HLA-I	S	30	38	NSFTRGVYY	9	No	3	0	4	4	5	1	4	0	2	1.68179
EpI_NSP3_915	HLA-I	NSP3	1081	1089	YYKKDNSYF	9	No	4	0	5	4	5	1	1	2	3	1.67981
EpI_S_341	HLA-I	S	392	400	FTNVYADSF	9	No	2	0	4	2	5	0	4	2	5	1.67367
EpI_NSP13_204	HLA-I	NSP13	289	297	SHFAIGLAL	9	No	3	0	5	4	6	0	1	2	7	1.67355
EpI_NSP15_188	HLA-I	NSP15	230	237	YAFEHIVY	8	Yes	4	0	4	4	4	0	3	2	4	1.67099
EpI_NSP3_1462	HLA-I	NSP3	1780	1788	FSSTFNVPM	9	No	3	0	7	2	5	0	2	2	6	1.6697
EpI_ORF3a_109	HLA-I	ORF3a	105	113	FLYLYALVY	9	No	4	0	4	4	4	1	3	1	2	1.66464
EpI_NSP12_455	HLA-I	NSP12	594	602	FYGGWHNML	9	No	4	0	5	5	5	1	0	2	4	1.66125
EpI_NSP14_292	HLA-I	NSP14	434	442	SAFVNLKQL	9	No	3	0	4	3	6	0	3	1	6	1.65838
EpI_NSP2_197	HLA-I	NSP2	300	308	FSASTSAFV	9	No	2	0	4	2	5	1	1	3	6	1.6574
EpI_NSP6_28	HLA-I	NSP6	36	43	FLYENAFL	8	No	2	0	3	3	4	1	1	3	7	1.6574
EpI_NSP12_296	HLA-I	NSP12	397	405	SVAALTNNV	9	No	1	0	3	1	4	1	2	3	8	1.65682
EpI_NSP3_290	HLA-I	NSP3	367	375	KLVSSFLEM	9	No	1	0	3	1	4	1	2	3	8	1.65682
EpI_NSP7_43	HLA-I	NSP7	54	62	SLLSVLLSM	9	Yes	1	0	3	1	4	1	2	3	8	1.65682
EpI_NSP8_136	HLA-I	NSP8	152	160	ALWEIQQVV	9	Yes	1	0	3	1	4	1	2	3	8	1.65682
EpI_NSP13_35	HLA-I	NSP13	73	81	KSHKPPISF	9	No	2	0	4	2	6	0	3	2	6	1.65511
EpI_NSP3_1112	HLA-I	NSP3	1353	1361	YFFTLLLQL	9	No	3	0	5	5	5	1	0	2	5	1.65331
EpI_NSP3_614	HLA-I	NSP3	727	735	HLDGEVITF	9	No	1	0	3	2	5	0	4	1	9	1.64986
EpI_NSP8_150	HLA-I	NSP8	172	180	ISMDNSPNL	9	No	1	0	4	2	5	0	4	1	8	1.64986
EpI_S_104	HLA-I	S	133	141	FQFCNDPFL	9	No	2	0	3	3	3	1	1	3	8	1.6462
EpI_NSP3_1105	HLA-I	NSP3	1350	1357	YMPYFFTL	8	No	2	0	2	2	3	2	1	3	6	1.64451
EpI_NSP5_62	HLA-I	NSP5	104	112	VRIQPGQTF	9	No	3	0	5	4	5	0	2	2	5	1.64449
EpI_NSP12_275	HLA-I	NSP12	372	380	LVYAADPAM	9	No	2	0	4	2	5	0	3	2	7	1.64391
EpI_NSP12_462	HLA-I	NSP12	606	614	YSDVENPHL	9	No	3	0	7	4	6	0	0	2	7	1.64379
EpI_NSP15_192	HLA-I	NSP15	237	245	YGDFSHSQL	9	No	3	0	7	4	6	0	0	2	7	1.64379
EpI_NSP12_88	HLA-I	NSP12	122	131	YTMADLVYAL	10	Yes	1	0	3	2	4	1	1	3	9	1.63826
EpI_ORF7a_3	HLA-I	ORF7a	4	12	ILFLALITL	9	No	1	0	3	2	4	1	1	3	9	1.63826
EpI_NSP12_654	HLA-I	NSP12	829	837	LPYPDPSRI	9	Yes	2	0	4	3	6	0	2	2	7	1.63655
EpI_NSP5_61	HLA-I	NSP5	103	112	FVRIQPGQTF	10	No	1	0	3	2	5	0	5	1	6	1.632
EpI_NSP12_691	HLA-I	NSP12	876	884	EYADVFHLY	9	Yes	2	0	3	4	4	2	2	1	3	1.62852
EpI_NSP6_69	HLA-I	NSP6	58	66	MFVKHKHAF	9	No	3	0	5	3	5	1	2	1	4	1.62694
EpI_NSP1_102	HLA-I	NSP1	110	118	HVGEIPVAY	9	No	2	0	4	3	4	0	4	2	4	1.62605
EpI_NSP3_659	HLA-I	NSP3	772	780	YGQQFGPTY	9	No	2	0	4	2	5	0	4	2	4	1.62605
EpI_S_677	HLA-I	S	870	878	IAQYTSALL	9	No	2	0	5	2	6	0	2	2	7	1.62535
EpI_NSP12_503	HLA-I	NSP12	655	663	LANECAQVL	9	No	3	0	7	2	5	0	2	2	5	1.62208
EpI_S_230	HLA-I	S	267	275	VGYLQPRTF	9	No	2	0	4	2	6	0	4	1	5	1.62138
EpI_ORF7a_60	HLA-I	ORF7a	78	86	RARSVSPKL	9	No	2	0	4	2	5	0	4	1	6	1.61018
EpI_S_434	HLA-I	S	505	513	YQPYRVVVL	9	Yes	2	0	4	3	5	0	2	1	10	1.60948
EpI_NSP2_272	HLA-I	NSP2	381	389	VLQKAAITI	9	No	1	0	3	1	4	1	2	3	7	1.6092
EpI_NSP7_40	HLA-I	NSP7	51	59	KMVSLLSVL	9	No	1	0	3	1	4	1	2	3	7	1.6092
EpI_NSP2_311	HLA-I	NSP2	418	426	MAYITGGVV	9	No	1	0	3	1	5	0	4	2	7	1.60691
EpI_NSP3_1188	HLA-I	NSP3	1455	1463	STNVTIATY	9	No	3	0	4	4	5	1	3	0	3	1.60441
EpI_NSP7_50	HLA-I	NSP7	74	82	EMLDNRATL	9	No	2	0	4	3	6	0	3	1	6	1.60282
EpI_NSP3_607	HLA-I	NSP3	720	728	TSNPTTFHL	9	No	1	0	4	2	5	0	4	1	7	1.60224
EpI_NSP14_123	HLA-I	NSP14	176	184	NLSDRVVFV	9	No	3	0	3	3	4	1	1	2	7	1.60184
EpI_NSP3_1277	HLA-I	NSP3	1555	1563	QMAPISAMV	9	No	1	0	2	1	3	1	2	3	9	1.59799
EpI_NSP3_1002	HLA-I	NSP3	1199	1207	KPVETSNSF	9	No	2	0	4	3	4	0	3	2	6	1.59629
EpI_NSP3_1282	HLA-I	NSP3	1557	1565	APISAMVRM	9	No	2	0	4	3	4	0	3	2	6	1.59629
EpI_S_498	HLA-I	S	625	633	HADQLTPTW	9	No	2	0	4	2	5	0	3	2	6	1.59629
EpI_S_719	HLA-I	S	915	923	VLYENQKLI	9	No	2	0	4	2	5	0	3	2	6	1.59629
EpI_NSP3_3	HLA-I	NSP3	7	15	FGDDTVIEV	9	No	2	0	5	3	5	0	1	2	9	1.59559
EpI_NSP3_1264	HLA-I	NSP3	1539	1547	HFISNSWLM	9	Yes	3	0	5	5	4	1	0	2	5	1.59449
EpI_NSP2_36	HLA-I	NSP2	67	75	KSYELQTPF	9	No	2	0	5	2	6	0	3	1	6	1.59162
EpI_NSP3_275	HLA-I	NSP3	356	364	YLAVFDKNL	9	No	1	0	3	2	4	1	1	3	8	1.59064
EpI_S_342	HLA-I	S	394	402	NVYADSFVI	9	No	0	0	2	1	4	0	4	2	10	1.58777
EpI_NSP6_8	HLA-I	NSP6	14	22	LLLTILTSL	9	No	2	0	4	1	4	1	1	3	7	1.58737
EpI_M_184	HLA-I	M	188	196	AGDSGFAAY	9	No	3	0	4	3	4	0	4	2	2	1.58637
EpI_ORF10_37	HLA-I	ORF10	28	37	AQVDVVNFNL	10	No	1	0	1	2	1	1	4	2	8	1.58282
EpI_NSP12_41	HLA-I	NSP12	69	77	YFVVKRHTF	9	No	2	0	4	4	5	1	2	1	4	1.58259
EpI_NSP2_201	HLA-I	NSP2	303	311	STSAFVETV	9	No	1	0	3	1	4	1	1	3	9	1.57944
EpI_NSP2_19	HLA-I	NSP2	41	49	FIDTKRGVY	9	No	3	0	4	4	6	0	3	1	3	1.57435
EpI_NSP2_397	HLA-I	NSP2	521	529	KALNLGETF	9	No	1	0	3	1	5	0	5	1	6	1.57318
EpI_NSP12_745	HLA-I	NSP12	922	930	EAMYTPHTV	9	No	2	0	4	3	6	0	2	1	8	1.57306
EpI_NSP14_40	HLA-I	NSP14	64	72	YQVNGYPNM	9	No	1	0	3	2	5	0	3	1	10	1.57248
EpI_NSP5_55	HLA-I	NSP5	93	101	TANPKTPKY	9	No	2	0	4	2	4	0	4	2	4	1.56723
EpI_NSP10_45	HLA-I	NSP10	104	112	ANDPVGFTL	9	No	2	0	5	3	5	0	2	1	8	1.56186
EpI_NSP13_214	HLA-I	NSP13	296	304	ALYYPSARI	9	No	1	0	3	1	4	1	2	3	6	1.56158
EpI_NSP3_513	HLA-I	NSP3	615	623	SLINTLNDL	9	No	1	0	3	1	4	1	2	3	6	1.56158
EpI_ORF3a_4	HLA-I	ORF3a	6	15	RIFTIGTVTL	10	No	1	0	3	1	4	1	2	3	6	1.56158
EpI_S_504	HLA-I	S	635	643	VYSTGSNVF	9	No	4	0	5	4	5	1	0	2	3	1.55481
EpI_N_149	HLA-I	N	299	307	KHWPQIAQF	9	No	3	0	4	4	3	1	1	2	5	1.55423
EpI_NSP12_675	HLA-I	NSP12	859	867	FVSLAIDAY	9	Yes	2	0	3	4	4	1	3	1	3	1.55352
EpI_NSP3_49	HLA-I	NSP3	60	68	AVIKTLQPV	9	No	1	0	3	1	3	1	2	3	7	1.55037
EpI_NSP3_1299	HLA-I	NSP3	1567	1575	IFFASFYYV	9	No	2	0	3	3	2	2	1	3	3	1.54928
EpI_S_11	HLA-I	S	24	32	LPPAYTNSF	9	No	2	0	4	3	4	0	3	2	5	1.54867
EpI_ORF3a_71	HLA-I	ORF3a	71	79	LALSKGVHF	9	No	1	0	3	1	4	0	4	2	7	1.54809
EpI_NSP13_53	HLA-I	NSP13	114	122	WTNAGDYIL	9	No	2	0	5	3	5	0	1	2	8	1.54797
EpI_NSP3_286	HLA-I	NSP3	364	372	LYDKLVSSF	9	No	3	0	5	4	5	1	0	2	4	1.54687
EpI_M_164	HLA-I	M	168	176	ITVATSRTL	9	No	2	0	4	2	6	0	3	1	6	1.544
EpI_ORF7a_25	HLA-I	ORF7a	38	46	GTYEGNSPF	9	No	2	0	4	2	6	0	3	1	6	1.544
EpI_NSP3_900	HLA-I	NSP3	1058	1066	TIKPVTYKL	9	No	1	0	3	1	5	0	4	1	8	1.54342
EpI_NSP5_33	HLA-I	NSP5	67	75	LVQAGNVQL	9	No	1	0	4	1	5	0	4	1	7	1.54342
EpI_NSP12_472	HLA-I	NSP12	624	632	RAMPNMLRI	9	No	3	0	5	2	5	0	3	1	5	1.54073
EpI_NSP3_424	HLA-I	NSP3	520	528	TVEEAKTVL	9	No	1	0	3	2	5	0	3	2	7	1.54073
EpI_NSP12_170	HLA-I	NSP12	240	247	LLMPILTL	8	Yes	2	0	4	1	4	1	1	3	6	1.53975
EpI_NSP12_243	HLA-I	NSP12	333	342	IFVDGVPFVV	10	Yes	2	0	3	2	2	2	1	3	4	1.53807
EpI_NSP6_47	HLA-I	NSP6	45	52	FAMGIIAM	8	No	2	0	4	2	4	0	3	2	6	1.53746
EpI_NSP13_154	HLA-I	NSP13	233	241	MPLSAPTLV	9	No	2	0	3	3	4	0	2	3	6	1.53478
EpI_NSP12_35	HLA-I	NSP12	64	72	NLIDSYFVV	9	No	1	0	2	2	3	1	1	3	9	1.53182
EpI_NSP12_531	HLA-I	NSP12	692	700	SVFNICQAV	9	No	1	0	3	1	4	1	1	3	8	1.53182
EpI_NSP3_311	HLA-I	NSP3	396	404	FITESKPSV	9	No	1	0	3	1	4	1	1	3	8	1.53182
EpI_NSP4_291	HLA-I	NSP4	335	344	YSFLPGVYSV	10	No	1	0	3	1	4	1	1	3	8	1.53182
EpI_ORF6_13	HLA-I	ORF6	10	18	TIAEILLII	9	No	1	0	3	1	4	1	1	3	8	1.53182
EpI_ORF7b_18	HLA-I	ORF7b	26	34	IIFWFSLEL	9	No	1	0	4	1	4	1	1	3	7	1.53182
EpI_NSP13_6	HLA-I	NSP13	33	41	HVISTSHKL	9	No	1	0	3	2	5	0	3	1	9	1.52486
EpI_N_201	HLA-I	N	355	363	KHIDAYKTF	9	Yes	3	0	4	4	3	1	2	1	4	1.52049
EpI_NSP13_323	HLA-I	NSP13	430	438	KTIGPDMFL	9	No	2	0	5	2	5	0	2	2	6	1.51891
EpI_NSP3_1173	HLA-I	NSP3	1436	1444	MSNLGMPSY	9	No	4	0	5	4	4	0	3	1	2	1.51225
EpI_NSP3_1226	HLA-I	NSP3	1507	1516	AEWFLAYILF	10	No	3	0	3	2	3	2	2	1	3	1.50761
EpI_ORF7a_83	HLA-I	ORF7a	95	103	ELYSPIFLI	9	No	2	0	2	2	3	1	2	2	7	1.50602
EpI_NSP14_357	HLA-I	NSP14	509	517	WVYKQFDTY	9	No	2	0	3	4	4	1	3	1	2	1.50591
EpI_NSP4_106	HLA-I	NSP4	126	134	FSAVGNICY	9	Yes	2	0	3	4	4	1	3	1	2	1.50591
EpI_NSP13_219	HLA-I	NSP13	297	305	LYYPSARIV	9	Yes	5	0	5	4	4	1	0	2	2	1.50392
EpI_NSP2_352	HLA-I	NSP2	461	469	FLRDGWEIV	9	No	1	0	2	1	3	1	2	3	7	1.50275
EpI_NSP6_164	HLA-I	NSP6	142	150	LMNVLTLVY	9	No	3	0	3	4	3	1	3	1	2	1.50264
EpI_S_317	HLA-I	S	361	369	CVADYSVLY	9	Yes	3	0	3	4	3	1	3	1	2	1.50264
EpI_NSP3_556	HLA-I	NSP3	660	668	SSPDAVTAY	9	No	2	0	4	2	5	0	3	2	4	1.50105
EpI_NSP3_1232	HLA-I	NSP3	1511	1519	LAYILFTRF	9	No	1	0	4	1	4	0	4	2	5	1.50047
EpI_ORF3a_92	HLA-I	ORF3a	97	105	VAAGLEAPF	9	No	1	0	4	1	4	0	4	2	5	1.50047
EpI_NSP16_78	HLA-I	NSP16	88	96	WLPTGTLLV	9	Yes	2	0	2	2	3	1	1	3	7	1.49213
EpI_NSP2_80	HLA-I	NSP2	112	120	KLDGFMGRI	9	No	2	0	2	2	3	1	1	3	7	1.49213
EpI_ORF8_68	HLA-I	ORF8	108	116	FLEYHDVRV	9	No	2	0	2	2	3	1	1	3	7	1.49213
EpI_ORF3a_33	HLA-I	ORF3a	35	43	IPIQASLPF	9	No	2	0	4	2	4	0	3	2	5	1.48985
EpI_NSP14_33	HLA-I	NSP14	56	64	SMMGFKMNY	9	Yes	3	0	4	3	4	1	3	0	3	1.48676
EpI_NSP4_379	HLA-I	NSP4	401	409	RVVFNGVSF	9	No	2	0	4	2	5	0	3	1	6	1.48518
EpI_NSP14_371	HLA-I	NSP14	518	526	NLWNTFTRL	9	Yes	1	0	2	2	3	1	1	3	8	1.4842
EpI_NSP15_226	HLA-I	NSP15	297	305	LLLDDFVEI	9	Yes	1	0	3	1	4	1	1	3	7	1.4842
EpI_NSP5_175	HLA-I	NSP5	260	268	AVLDMCASL	9	No	1	0	3	1	4	1	1	3	7	1.4842
EpI_NSP8_89	HLA-I	NSP8	90	98	MLFTMLRKL	9	No	1	0	3	1	4	1	1	3	7	1.4842
EpI_NSP12_17	HLA-I	NSP12	27	35	STDVVYRAF	9	No	2	0	4	2	6	0	2	2	5	1.48249
EpI_NSP3_1460	HLA-I	NSP3	1778	1786	NTFSSTFNV	9	No	1	0	2	2	3	2	1	2	6	1.47785
EpI_NSP6_212	HLA-I	NSP6	183	191	MFLARGIVF	9	No	2	0	4	3	5	1	2	1	3	1.47614
EpI_NSP15_35	HLA-I	NSP15	49	57	LPVNVAFEL	9	Yes	2	0	4	3	4	0	2	2	6	1.47129
EpI_ORF10_13	HLA-I	ORF10	7	14	FAFPFTIY	8	No	2	0	3	2	3	0	4	2	4	1.46078
EpI_NSP4_92	HLA-I	NSP4	113	121	TTNGDFLHF	9	No	1	0	3	2	5	0	4	1	5	1.45938
EpI_ORF10_36	HLA-I	ORF10	27	35	IAQVDVVNF	9	No	1	0	3	1	4	0	4	2	5	1.45285
EpI_S_321	HLA-I	S	366	374	SVLYNSASF	9	No	1	0	3	1	4	0	4	2	5	1.45285
EpI_NSP3_1518	HLA-I	NSP3	1857	1865	LTYNKVENM	9	No	2	0	4	2	6	0	3	1	4	1.44876
EpI_S_560	HLA-I	S	710	718	NSIAIPTNF	9	No	1	0	3	1	5	0	4	1	6	1.44818
EpI_NSP14_189	HLA-I	NSP14	288	296	KRVDWTIEY	9	No	4	0	4	5	4	0	2	1	3	1.44608
EpI_S_492	HLA-I	S	612	620	YQDVNCTEV	9	No	2	0	2	3	2	1	1	3	6	1.44451
EpI_ORF10_12	HLA-I	ORF10	7	16	FAFPFTIYSL	10	No	2	0	4	2	4	0	2	1	9	1.44421
EpI_N_26	HLA-I	N	66	74	FPRGQGVPI	9	Yes	3	0	4	2	3	0	3	2	4	1.43896
EpI_NSP12_676	HLA-I	NSP12	861	869	SLAIDAYPL	9	Yes	1	0	2	2	3	1	1	3	7	1.43658
EpI_NSP3_935	HLA-I	NSP3	1102	1110	YPNASFDNF	9	No	1	0	3	2	4	0	3	2	6	1.43429
EpI_NSP3_701	HLA-I	NSP3	824	832	FLGRYMSAL	9	Yes	2	0	3	1	3	1	1	3	6	1.43331
EpI_NSP4_277	HLA-I	NSP4	322	329	FLMSFTVL	8	No	2	0	3	1	3	1	1	3	6	1.43331
EpI_NSP15_209	HLA-I	NSP15	257	265	RFKESPFEL	9	No	2	0	5	3	5	1	0	2	4	1.43249
EpI_NSP2_304	HLA-I	NSP2	410	418	LATNNLVVM	9	No	2	0	4	1	4	0	3	2	5	1.43102
EpI_NSP2_424	HLA-I	NSP2	551	559	MPLKAPKEI	9	No	2	0	3	2	3	0	3	2	6	1.43102
EpI_N_16	HLA-I	N	48	56	NTASWFTAL	9	No	1	0	3	2	5	0	3	1	7	1.42962
EpI_NSP14_337	HLA-I	NSP14	494	501	YLDAYNMM	8	Yes	3	0	3	3	4	1	0	2	6	1.42923
EpI_NSP3_519	HLA-I	NSP3	622	630	DLNETLVTM	9	No	0	0	2	1	4	0	4	1	9	1.42904
EpI_NSP12_439	HLA-I	NSP12	579	587	IAATRGATV	9	No	3	0	4	2	6	0	2	1	5	1.42694
EpI_NSP12_87	HLA-I	NSP12	122	130	YTMADLVYA	9	Yes	1	0	3	1	3	1	1	3	7	1.42537
EpI_NSP4_16	HLA-I	NSP4	19	27	FVAAIFYLI	9	No	1	0	2	1	3	1	1	3	8	1.42537
EpI_S_943	HLA-I	S	1220	1228	FIAGLIAIV	9	Yes	1	0	2	1	3	1	1	3	8	1.42537
EpI_ORF8_63	HLA-I	ORF8	103	111	SFYEDFLEY	9	No	2	0	3	3	4	0	4	1	3	1.4197
EpI_NSP13_356	HLA-I	NSP13	480	488	ITHDVSSAI	9	No	2	0	4	2	6	0	2	1	6	1.419
EpI_NSP12_519	HLA-I	NSP12	681	689	SSGDATTAY	9	Yes	3	0	4	4	4	0	3	1	2	1.40908
EpI_NSP3_493	HLA-I	NSP3	597	605	VVDYGARFY	9	No	3	0	3	4	4	0	3	1	3	1.40908
EpI_NSP7_31	HLA-I	NSP7	46	55	TEAFEKMVSL	10	Yes	0	0	2	1	4	1	3	1	7	1.4088
EpI_NSP3_430	HLA-I	NSP3	533	541	SAFYILPSI	9	No	2	0	4	2	5	0	2	1	7	1.4078
EpI_NSP4_257	HLA-I	NSP4	306	314	RAFGEYSHV	9	No	2	0	5	2	5	0	2	1	6	1.4078
EpI_NSP6_50	HLA-I	NSP6	47	55	MGIIAMSAF	9	No	1	0	3	1	4	0	4	2	4	1.40523
EpI_NSP6_159	HLA-I	NSP6	140	148	WTLMNVLTL	9	No	2	0	4	3	5	0	1	2	6	1.40511
EpI_ORF3a_52	HLA-I	ORF3a	56	65	FQSASKIITL	10	No	1	0	3	2	4	1	0	2	9	1.40215
EpI_NSP3_1331	HLA-I	NSP3	1608	1616	IVNGVRRSF	9	No	1	0	3	1	5	0	4	1	5	1.40056
EpI_M_170	HLA-I	M	171	179	ATSRTLSYY	9	Yes	3	0	3	4	4	2	1	0	2	1.40035
EpI_NSP4_450	HLA-I	NSP4	478	487	FSNSGSDVLY	10	No	2	0	2	4	3	1	3	1	2	1.39946
EpI_NSP4_319	HLA-I	NSP4	351	359	FYLTNDVSF	9	No	2	0	4	4	4	1	1	1	4	1.39876
EpI_NSP13_178	HLA-I	NSP13	258	266	ISDEFSSNV	9	No	2	0	5	2	4	0	1	3	5	1.39858
EpI_NSP4_334	HLA-I	NSP4	361	369	AHIQWMVMF	9	No	3	0	4	4	3	1	1	1	4	1.39549
EpI_ORF8_6	HLA-I	ORF8	5	13	VFLGIITTV	9	No	2	0	3	2	4	1	1	2	5	1.39223
EpI_ORF3a_42	HLA-I	ORF3a	45	53	WLIVGVALL	9	No	1	0	2	2	3	1	1	3	6	1.38896
EpI_NSP2_148	HLA-I	NSP2	224	233	IAFGGCVFSY	10	No	2	0	3	3	3	1	3	1	2	1.38826
EpI_NSP6_91	HLA-I	NSP6	77	85	TVAYFNMVY	9	Yes	2	0	3	3	3	1	3	1	2	1.38826
EpI_S_42	HLA-I	S	50	58	STQDLFLPF	9	No	1	0	3	2	4	0	3	2	5	1.38667
EpI_S_208	HLA-I	S	241	249	LLALHRSYL	9	No	2	0	3	1	3	1	1	3	5	1.38569
EpI_N_161	HLA-I	N	307	314	FAPSASAF	8	Yes	2	0	4	1	4	0	3	2	4	1.3834
EpI_NSP2_234	HLA-I	NSP2	348	356	SILSPLYAF	9	No	0	0	3	1	4	0	4	1	7	1.38142
EpI_NSP13_153	HLA-I	NSP13	233	240	MPLSAPTL	8	No	4	0	4	4	2	0	2	2	3	1.38072
EpI_NSP3_1079	HLA-I	NSP3	1315	1323	VPWDTIANY	9	No	2	0	3	2	3	0	5	1	2	1.37944
EpI_NSP1_110	HLA-I	NSP1	114	122	IPVAYRKVL	9	No	2	0	4	2	4	0	3	1	5	1.37873
EpI_NSP12_550	HLA-I	NSP12	719	727	YVRNLQHRL	9	No	2	0	4	1	5	0	3	1	5	1.37873
EpI_NSP3_419	HLA-I	NSP3	519	527	YTVEEAKTV	9	No	2	0	5	2	5	0	1	1	8	1.37803
EpI_NSP4_179	HLA-I	NSP4	205	213	YLEGSVRVV	9	No	1	0	2	1	3	1	1	3	7	1.37775
EpI_NSP8_125	HLA-I	NSP8	140	149	NTCDGTTFTY	10	No	3	0	3	4	3	1	2	1	2	1.37764
EpI_NSP8_6	HLA-I	NSP8	4	12	SEFSSLPSY	9	Yes	3	0	2	2	3	0	5	0	4	1.3715
EpI_NSP3_1062	HLA-I	NSP3	1291	1299	KPNELSRVL	9	No	1	0	3	2	4	0	3	1	7	1.3708
EpI_NSP14_5	HLA-I	NSP14	19	27	HPTQAPTHL	9	No	2	0	3	3	3	0	2	2	6	1.36485
EpI_NSP13_128	HLA-I	NSP13	209	218	VVYRGTTTYK	10	Yes	3	0	2	3	2	2	2	1	1	1.36475
EpI_NSP12_631	HLA-I	NSP12	810	818	HEFCSQHTM	9	No	3	0	2	3	4	1	2	0	5	1.36176
EpI_S_489	HLA-I	S	604	612	TSNQVAVLY	9	No	3	0	4	4	4	0	3	1	1	1.36146
EpI_N_167	HLA-I	N	312	320	SAFFGMSRI	9	No	2	0	4	2	5	0	2	1	6	1.36018
EpI_NSP3_1197	HLA-I	NSP3	1481	1489	DTYPSLETI	9	No	2	0	4	2	5	0	2	1	6	1.36018
EpI_NSP3_73	HLA-I	NSP3	87	96	YYLFDESGEF	10	No	2	0	3	3	3	1	2	1	4	1.3585
EpI_ORF3a_125	HLA-I	ORF3a	113	121	YFLQSINFV	9	No	3	0	4	3	3	1	1	2	2	1.35254
EpI_M_205	HLA-I	M	211	219	SSSSDNIAL	9	No	1	0	5	2	5	0	2	1	6	1.35224
EpI_NSP13_270	HLA-I	NSP13	371	379	VVFDEISMA	9	No	1	0	2	1	2	1	2	3	5	1.34869
EpI_NSP13_78	HLA-I	NSP13	146	154	KLSYGIATV	9	Yes	1	0	2	1	3	1	2	2	6	1.34402
EpI_NSP3_1453	HLA-I	NSP3	1771	1780	KMFDAYVNTF	10	No	1	0	3	1	3	1	2	2	5	1.34402
EpI_NSP4_167	HLA-I	NSP4	197	206	SIIQFPNTYL	10	No	1	0	2	1	3	1	2	2	6	1.34402
EpI_NSP8_60	HLA-I	NSP8	61	70	KMADQAMTQM	10	No	1	0	2	1	3	1	2	2	6	1.34402
EpI_NSP13_221	HLA-I	NSP13	298	306	YYPSARIVY	9	Yes	3	0	4	4	5	0	2	1	2	1.3429
EpI_S_420	HLA-I	S	495	503	YGFQPTNGV	9	No	2	0	4	3	5	0	1	1	7	1.34162
EpI_M_98	HLA-I	M	95	103	YFIASFRLF	9	No	3	0	5	4	5	1	0	1	2	1.34052
EpI_NSP3_1108	HLA-I	NSP3	1351	1358	MPYFFTLL	8	No	4	0	4	3	1	0	3	2	2	1.34045
EpI_NSP13_25	HLA-I	NSP13	62	70	QLYLGGMSY	9	Yes	2	0	3	3	4	1	3	0	2	1.33597
EpI_NSP8_79	HLA-I	NSP8	85	92	SAMQTMLF	8	No	2	0	3	1	4	0	3	2	4	1.33578
EpI_NSP3_491	HLA-I	NSP3	596	604	GVVDYGARF	9	No	1	0	3	2	5	0	3	1	5	1.33438
EpI_NSP15_229	HLA-I	NSP15	298	306	LLDDFVEII	9	Yes	2	0	2	2	3	1	1	2	6	1.3334
EpI_NSP3_665	HLA-I	NSP3	780	789	YLDGADVTKI	10	No	2	0	2	2	3	1	1	2	6	1.3334
EpI_S_70	HLA-I	S	83	92	VLPFNDGVYF	10	No	1	0	1	1	2	1	4	1	5	1.32885
EpI_S_273	HLA-I	S	320	329	VQPTESIVRF	10	No	1	0	1	1	2	1	4	1	5	1.32885
EpI_NSP3_650	HLA-I	NSP3	762	770	HTQVVDMSM	9	No	1	0	3	1	4	0	3	2	5	1.32785
EpI_NSP3_963	HLA-I	NSP3	1142	1150	FPDLNGDVV	9	No	1	0	2	2	3	0	3	2	6	1.32785
EpI_NSP6_54	HLA-I	NSP6	50	57	IAMSAFAM	8	No	1	0	4	1	4	0	3	2	4	1.32785
EpI_NSP6_199	HLA-I	NSP6	175	183	YSGVVTTVM	9	No	1	0	3	1	4	0	3	2	5	1.32785
EpI_S_945	HLA-I	S	1221	1229	IAGLIAIVM	9	No	1	0	3	1	4	0	3	2	5	1.32785
EpI_NSP12_620	HLA-I	NSP12	785	793	VLYYQNNVF	9	No	1	0	3	1	5	0	3	1	6	1.32318
EpI_NSP16_29	HLA-I	NSP16	34	42	ATLPKGIMM	9	No	1	0	4	1	5	0	3	1	5	1.32318
EpI_NSP3_954	HLA-I	NSP3	1133	1141	ASRELKVTF	9	No	1	0	3	1	5	0	3	1	6	1.32318
EpI_NSP3_1034	HLA-I	NSP3	1258	1266	ILKPANNSL	9	No	1	0	3	2	5	0	1	1	10	1.32248
EpI_M_45	HLA-I	M	43	51	NRFLYIIKL	9	No	3	0	3	4	3	0	2	1	5	1.32049
EpI_NSP13_14	HLA-I	NSP13	41	49	LVLSVNPYV	9	Yes	1	0	2	1	2	1	1	3	7	1.31893
EpI_NSP4_209	HLA-I	NSP4	253	261	GVFCGVDAV	9	No	1	0	2	1	2	1	1	3	7	1.31893
EpI_NSP4_61	HLA-I	NSP4	74	82	WFSQRGGSY	9	Yes	3	0	3	4	4	0	1	2	4	1.31781
EpI_NSP12_225	HLA-I	NSP12	321	329	FPPTSFGPL	9	Yes	2	0	3	3	3	0	2	2	5	1.31723
EpI_NSP6_174	HLA-I	NSP6	150	158	YKVYYGNAL	9	Yes	2	0	3	3	3	0	2	2	5	1.31723
EpI_ORF7a_35	HLA-I	ORF7a	47	56	HPLADNKFAL	10	Yes	3	0	3	3	1	0	3	1	6	1.31664
EpI_NSP1_26	HLA-I	NSP1	31	39	FGDSVEEVL	9	No	2	0	5	3	4	0	0	2	7	1.31653
EpI_NSP2_39	HLA-I	NSP2	69	77	YELQTPFEI	9	No	2	0	1	3	2	1	3	0	6	1.31356
EpI_NSP12_656	HLA-I	NSP12	831	838	YPDPSRIL	8	Yes	2	0	3	3	4	0	2	1	6	1.31256
EpI_NSP3_1238	HLA-I	NSP3	1514	1522	ILFTRFFYV	9	No	2	0	2	1	2	1	1	2	8	1.31099
EpI_NSP14_364	HLA-I	NSP14	515	523	DTYNLWNTF	9	No	2	0	3	2	4	1	2	1	3	1.31088
EpI_NSP13_152	HLA-I	NSP13	232	240	VMPLSAPTL	9	No	1	0	3	2	4	0	2	2	6	1.30929
EpI_NSP15_245	HLA-I	NSP15	321	329	TIDYTEISF	9	No	1	0	3	1	5	0	2	2	6	1.30929
EpI_NSP3_52	HLA-I	NSP3	64	72	TLQPVSELL	9	No	1	0	3	2	4	0	2	2	6	1.30929
EpI_NSP13_316	HLA-I	NSP13	421	429	YFNSVCRLM	9	No	4	0	5	5	4	0	0	2	2	1.30719
EpI_NSP13_26	HLA-I	NSP13	62	71	QLYLGGMSYY	10	Yes	2	0	2	3	3	2	2	0	2	1.30453
EpI_NSP3_1064	HLA-I	NSP3	1293	1301	NELSRVLGL	9	No	3	0	2	3	3	1	2	0	5	1.30294
EpI_NSP14_66	HLA-I	NSP14	99	107	EAVGTNLPL	9	No	1	0	4	2	3	0	2	2	6	1.29809
EpI_ORF3a_221	HLA-I	ORF3a	247	255	HTIDGSSGV	9	No	1	0	3	1	4	0	2	2	7	1.29809
EpI_NSP6_265	HLA-I	NSP6	251	259	FRYMNSQGL	9	Yes	4	0	4	4	4	0	0	2	4	1.29599
EpI_S_176	HLA-I	S	212	220	LVRDLPQGF	9	No	1	0	3	1	4	0	4	1	4	1.29412
EpI_NSP12_272	HLA-I	NSP12	366	374	LSFKELLVY	9	Yes	3	0	4	3	3	0	3	1	2	1.29143
EpI_NSP2_279	HLA-I	NSP2	388	396	TILDGISQY	9	No	3	0	4	3	3	0	3	1	2	1.29143
EpI_NSP4_274	HLA-I	NSP4	315	323	VAFNTLLFL	9	No	3	0	5	2	5	0	1	1	5	1.29073
EpI_NSP15_173	HLA-I	NSP15	217	225	AMDEFIERY	9	No	2	0	3	3	5	0	3	0	4	1.29003
EpI_S_269	HLA-I	S	318	326	FRVQPTESI	9	No	3	0	4	4	4	0	0	2	5	1.28805
EpI_NSP13_79	HLA-I	NSP13	146	155	KLSYGIATVR	10	Yes	3	0	2	3	2	2	1	1	2	1.28737
EpI_NSP2_331	HLA-I	NSP2	440	448	VYEKLKPVL	9	No	3	0	3	3	4	1	0	2	3	1.28637
EpI_NSP6_268	HLA-I	NSP6	252	260	RYMNSQGLL	9	Yes	3	0	3	3	4	1	0	2	3	1.28637
EpI_S_558	HLA-I	S	706	714	AYSNNSIAI	9	No	3	0	3	3	4	1	0	2	3	1.28637
EpI_NSP12_242	HLA-I	NSP12	333	341	IFVDGVPFV	9	No	2	0	2	2	3	1	1	2	5	1.28578
EpI_NSP15_157	HLA-I	NSP15	207	216	SQMEIDFLEL	10	No	1	0	1	2	1	1	2	2	7	1.2852
EpI_NSP5_67	HLA-I	NSP5	106	114	IQPGQTFSV	9	Yes	1	0	1	2	1	1	2	2	7	1.2852
EpI_NSP3_940	HLA-I	NSP3	1105	1113	ASFDNFKFV	9	No	2	0	4	2	5	0	1	1	7	1.2828
EpI_NSP5_32	HLA-I	NSP5	66	75	FLVQAGNVQL	10	No	1	0	2	1	3	1	1	3	5	1.28252
EpI_NSP3_656	HLA-I	NSP3	770	780	MTYGQQFGPTY	11	No	2	0	2	3	2	1	3	1	2	1.28182
EpI_NSP6_190	HLA-I	NSP6	167	175	LIISVTSNY	9	No	2	0	2	3	2	1	3	1	2	1.28182
EpI_ORF10_8	HLA-I	ORF10	5	14	NVFAFPFTIY	10	No	2	0	2	3	2	1	3	1	2	1.28182
EpI_NSP12_241	HLA-I	NSP12	332	340	KIFVDGVPF	9	No	1	0	3	1	4	0	3	2	4	1.28023
EpI_NSP14_282	HLA-I	NSP14	424	431	HAFHTPAF	8	No	1	0	3	1	4	0	3	2	4	1.28023
EpI_NSP2_147	HLA-I	NSP2	223	231	TIAFGGCVF	9	No	1	0	3	1	4	0	3	2	4	1.28023
EpI_NSP4_333	HLA-I	NSP4	360	368	LAHIQWMVM	9	No	1	0	3	1	4	0	3	2	4	1.28023
EpI_S_549	HLA-I	S	699	707	LGAENSVAY	9	No	1	0	3	2	3	0	3	2	4	1.28023
EpI_NSP12_220	HLA-I	NSP12	318	326	STVFPPTSF	9	No	1	0	3	1	5	0	3	1	5	1.27556
EpI_NSP12_321	HLA-I	NSP12	433	441	SSVELKHFF	9	No	1	0	3	1	5	0	3	1	5	1.27556
EpI_NSP2_2	HLA-I	NSP2	2	10	YTRYVDNNF	9	No	1	0	3	1	5	0	3	1	5	1.27556
EpI_S_27	HLA-I	S	35	43	GVYYPDKVF	9	No	1	0	3	1	5	0	3	1	5	1.27556
EpI_NSP12_479	HLA-I	NSP12	628	636	NMLRIMASL	9	Yes	2	0	2	2	2	1	1	2	6	1.27458
EpI_NSP16_246	HLA-I	NSP16	288	296	VVISSDVLV	9	No	1	0	2	1	2	1	1	3	6	1.27131
EpI_NSP6_197	HLA-I	NSP6	174	182	NYSGVVTTV	9	No	3	0	3	4	3	1	0	1	5	1.27049
EpI_NSP4_8	HLA-I	NSP4	9	17	QLIKVTLVF	9	No	1	0	4	1	3	0	3	2	4	1.26902
EpI_NSP14_311	HLA-I	NSP14	460	468	VSDIDYVPL	9	No	2	0	7	2	5	0	0	2	4	1.26891
EpI_S_245	HLA-I	S	285	293	ITDAVDCAL	9	No	2	0	6	2	5	0	0	2	5	1.26891
EpI_NSP6_188	HLA-I	NSP6	163	171	SMWALIISV	9	No	1	0	2	1	3	1	1	2	7	1.26664
EpI_NSP3_367	HLA-I	NSP3	465	473	APYIVGDVV	9	No	1	0	2	2	3	0	3	1	7	1.26436
EpI_NSP3_798	HLA-I	NSP3	951	958	MYMGTLSY	8	Yes	2	0	2	3	3	1	2	1	3	1.26326
EpI_M_94	HLA-I	M	94	102	SYFIASFRL	9	No	2	0	4	3	4	1	0	1	5	1.26256
EpI_ORF3a_188	HLA-I	ORF3a	206	214	YFTSDYYQL	9	No	2	0	3	4	3	1	0	1	6	1.26256
EpI_NSP14_193	HLA-I	NSP14	296	303	YPIIGDEL	8	Yes	2	0	3	3	2	0	2	2	5	1.2584
EpI_NSP14_296	HLA-I	NSP14	436	444	FVNLKQLPF	9	No	2	0	4	1	4	0	2	2	4	1.2584
EpI_NSP12_140	HLA-I	NSP12	195	204	AMRNAGIVGV	10	No	2	0	2	2	2	1	2	2	3	1.25672
EpI_NSP13_330	HLA-I	NSP13	447	455	EIVDTVSAL	9	Yes	0	0	2	1	4	0	3	1	8	1.25642
EpI_NSP16_2	HLA-I	NSP16	2	11	SQAWQPGVAM	10	No	0	0	2	1	4	0	3	1	8	1.25642
EpI_ORF8_74	HLA-I	ORF8	110	118	EYHDVRVVL	9	No	3	0	3	4	4	0	1	1	5	1.25432
EpI_NSP13_434	HLA-I	NSP13	592	600	IPRRNVATL	9	Yes	2	0	4	2	4	0	2	1	5	1.25373
EpI_NSP4_103	HLA-I	NSP4	124	132	RVFSAVGNI	9	No	1	0	3	1	4	0	2	2	6	1.25047
EpI_NSP3_661	HLA-I	NSP3	773	781	GQQFGPTYL	9	No	1	0	1	2	2	1	3	0	7	1.2468
EpI_NSP1_135	HLA-I	NSP1	165	173	HSSGVTREL	9	No	1	0	4	1	5	0	2	1	6	1.2458
EpI_NSP3_1396	HLA-I	NSP3	1698	1706	HSLSHFVNL	9	No	1	0	3	2	4	0	2	1	7	1.2458
EpI_ORF3a_56	HLA-I	ORF3a	57	65	QSASKIITL	9	No	1	0	3	2	4	0	2	1	7	1.2458
EpI_ORF6_9	HLA-I	ORF6	7	15	FQVTIAEIL	9	No	0	0	1	1	2	1	3	1	7	1.24353
EpI_NSP4_112	HLA-I	NSP4	134	142	YTPSKLIEY	9	Yes	2	0	3	3	5	0	3	0	3	1.24241
EpI_S_671	HLA-I	S	865	873	LTDEMIAQY	9	No	2	0	3	3	5	0	3	0	3	1.24241
EpI_NSP16_192	HLA-I	NSP16	231	239	WRNTNPIQL	9	No	3	0	4	4	4	0	0	2	4	1.24043
EpI_M_93	HLA-I	M	93	101	LSYFIASFR	9	No	3	0	2	3	2	2	1	1	1	1.23975
EpI_M_154	HLA-I	M	150	158	RIAGHHLGR	9	No	3	0	2	3	2	2	1	1	1	1.23975
EpI_M_171	HLA-I	M	171	180	ATSRTLSYYK	10	Yes	3	0	2	3	2	2	1	1	1	1.23975
EpI_M_172	HLA-I	M	172	180	TSRTLSYYK	9	Yes	3	0	2	3	2	2	1	1	1	1.23975
EpI_M_196	HLA-I	M	196	205	YSRYRIGNYK	10	No	3	0	2	3	2	2	1	1	1	1.23975
EpI_N_165	HLA-I	N	311	319	ASAFFGMSR	9	Yes	3	0	2	3	2	2	1	1	1	1.23975
EpI_N_202	HLA-I	N	361	369	KTFPPTEPK	9	Yes	3	0	2	3	2	2	1	1	1	1.23975
EpI_NSP1_100	HLA-I	NSP1	110	119	HVGEIPVAYR	10	No	3	0	2	3	2	2	1	1	1	1.23975
EpI_NSP1_113	HLA-I	NSP1	116	124	VAYRKVLLR	9	No	3	0	2	3	2	2	1	1	1	1.23975
EpI_NSP10_18	HLA-I	NSP10	20	28	AVDAAKAYK	9	No	3	0	2	3	2	2	1	1	1	1.23975
EpI_NSP12_7	HLA-I	NSP12	10	18	RVCGVSAAR	9	No	3	0	2	3	2	2	1	1	1	1.23975
EpI_NSP12_20	HLA-I	NSP12	33	41	RAFDIYNDK	9	No	3	0	2	3	2	2	1	1	1	1.23975
EpI_NSP12_26	HLA-I	NSP12	41	50	KVAGFAKFLK	10	Yes	3	0	2	3	2	2	1	1	1	1.23975
EpI_NSP12_28	HLA-I	NSP12	42	50	VAGFAKFLK	9	Yes	3	0	2	3	2	2	1	1	1	1.23975
EpI_NSP12_63	HLA-I	NSP12	95	103	AVAKHDFFK	9	No	3	0	2	3	2	2	1	1	1	1.23975
EpI_NSP12_120	HLA-I	NSP12	173	181	RVYANLGER	9	Yes	3	0	2	3	2	2	1	1	1	1.23975
EpI_NSP12_172	HLA-I	NSP12	240	249	LLMPILTLTR	10	Yes	3	0	2	3	2	2	1	1	1	1.23975
EpI_NSP12_230	HLA-I	NSP12	324	332	TSFGPLVRK	9	Yes	3	0	2	3	2	2	1	1	1	1.23975
EpI_NSP12_255	HLA-I	NSP12	341	349	VVSTGYHFR	9	Yes	3	0	2	3	2	2	1	1	1	1.23975
EpI_NSP12_305	HLA-I	NSP12	409	417	TVKPGNFNK	9	Yes	3	0	2	3	2	2	1	1	1	1.23975
EpI_NSP12_363	HLA-I	NSP12	500	508	KSAGFPFNK	9	Yes	3	0	2	3	2	2	1	1	1	1.23975
EpI_NSP12_428	HLA-I	NSP12	566	574	MTNRQFHQK	9	Yes	3	0	2	3	2	2	1	1	1	1.23975
EpI_NSP12_467	HLA-I	NSP12	613	621	HLMGWDYPK	9	Yes	3	0	2	3	2	2	1	1	1	1.23975
EpI_NSP12_485	HLA-I	NSP12	631	640	RIMASLVLAR	10	Yes	3	0	2	3	2	2	1	1	1	1.23975
EpI_NSP12_488	HLA-I	NSP12	632	640	IMASLVLAR	9	Yes	3	0	2	3	2	2	1	1	1	1.23975
EpI_NSP12_490	HLA-I	NSP12	633	641	MASLVLARK	9	No	3	0	2	3	2	2	1	1	1	1.23975
EpI_NSP12_605	HLA-I	NSP12	775	783	LVASIKNFK	9	Yes	3	0	2	3	2	2	1	1	1	1.23975
EpI_NSP12_702	HLA-I	NSP12	882	890	HLYLQYIRK	9	Yes	3	0	2	3	2	2	1	1	1	1.23975
EpI_NSP13_33	HLA-I	NSP13	68	76	MSYYCKSHK	9	Yes	3	0	2	3	2	2	1	1	1	1.23975
EpI_NSP13_62	HLA-I	NSP13	131	139	KLFAAETLK	9	Yes	3	0	2	3	2	2	1	1	1	1.23975
EpI_NSP13_106	HLA-I	NSP13	180	189	YVFTGYRVTK	10	Yes	3	0	2	3	2	2	1	1	1	1.23975
EpI_NSP14_142	HLA-I	NSP14	192	200	LTSMKYFVK	9	Yes	3	0	2	3	2	2	1	1	1	1.23975
EpI_NSP14_354	HLA-I	NSP14	504	512	AGFSLWVYK	9	No	3	0	2	3	2	2	1	1	1	1.23975
EpI_NSP15_19	HLA-I	NSP15	26	34	IINNTVYTK	9	No	3	0	2	3	2	2	1	1	1	1.23975
EpI_NSP15_58	HLA-I	NSP15	80	89	AANTVIWDYK	10	Yes	3	0	2	3	2	2	1	1	1	1.23975
EpI_NSP15_124	HLA-I	NSP15	171	180	AVKTQFNYYK	10	No	3	0	2	3	2	2	1	1	1	1.23975
EpI_NSP16_133	HLA-I	NSP16	174	182	HSWNADLYK	9	No	3	0	2	3	2	2	1	1	1	1.23975
EpI_NSP16_199	HLA-I	NSP16	240	249	SSYSLFDMSK	10	Yes	3	0	2	3	2	2	1	1	1	1.23975
EpI_NSP2_71	HLA-I	NSP2	102	110	KTIQPRVEK	9	No	3	0	2	3	2	2	1	1	1	1.23975
EpI_NSP2_255	HLA-I	NSP2	362	370	RVVRSIFSR	9	No	3	0	2	3	2	2	1	1	1	1.23975
EpI_NSP2_380	HLA-I	NSP2	496	504	QTFFKLVNK	9	No	3	0	2	3	2	2	1	1	1	1.23975
EpI_NSP2_408	HLA-I	NSP2	530	538	VTHSKGLYR	9	No	3	0	2	3	2	2	1	1	1	1.23975
EpI_NSP2_409	HLA-I	NSP2	530	539	VTHSKGLYRK	10	No	3	0	2	3	2	2	1	1	1	1.23975
EpI_NSP2_490	HLA-I	NSP2	627	636	MVTNNTFTLK	10	No	3	0	2	3	2	2	1	1	1	1.23975
EpI_NSP2_491	HLA-I	NSP2	628	636	VTNNTFTLK	9	No	3	0	2	3	2	2	1	1	1	1.23975
EpI_NSP3_177	HLA-I	NSP3	239	248	VVNAANVYLK	10	No	3	0	2	3	2	2	1	1	1	1.23975
EpI_NSP3_279	HLA-I	NSP3	358	367	AVFDKNLYDK	10	No	3	0	2	3	2	2	1	1	1	1.23975
EpI_NSP3_697	HLA-I	NSP3	818	827	HTTDPSFLGR	10	No	3	0	2	3	2	2	1	1	1	1.23975
EpI_NSP3_705	HLA-I	NSP3	828	836	YMSALNHTK	9	Yes	3	0	2	3	2	2	1	1	1	1.23975
EpI_NSP3_707	HLA-I	NSP3	829	837	MSALNHTKK	9	No	3	0	2	3	2	2	1	1	1	1.23975
EpI_NSP3_801	HLA-I	NSP3	954	962	GTLSYEQFK	9	No	3	0	2	3	2	2	1	1	1	1.23975
EpI_NSP3_897	HLA-I	NSP3	1057	1065	TTIKPVTYK	9	No	3	0	2	3	2	2	1	1	1	1.23975
EpI_NSP3_901	HLA-I	NSP3	1058	1065	TIKPVTYK	8	No	3	0	2	3	2	2	1	1	1	1.23975
EpI_NSP3_995	HLA-I	NSP3	1183	1193	ATYKPNTWCIR	11	No	3	0	2	3	2	2	1	1	1	1.23975
EpI_NSP3_1123	HLA-I	NSP3	1374	1382	ASMPTTIAK	9	No	3	0	2	3	2	2	1	1	1	1.23975
EpI_NSP3_1144	HLA-I	NSP3	1399	1407	YLKSPNFSK	9	No	3	0	2	3	2	2	1	1	1	1.23975
EpI_NSP3_1211	HLA-I	NSP3	1489	1497	IQITISSFK	9	No	3	0	2	3	2	2	1	1	1	1.23975
EpI_NSP3_1464	HLA-I	NSP3	1782	1790	STFNVPMEK	9	No	3	0	2	3	2	2	1	1	1	1.23975
EpI_NSP5_44	HLA-I	NSP5	80	88	HSMQNCVLK	9	No	3	0	2	3	2	2	1	1	1	1.23975
EpI_NSP6_60	HLA-I	NSP6	53	61	SAFAMMFVK	9	No	3	0	2	3	2	2	1	1	1	1.23975
EpI_NSP8_85	HLA-I	NSP8	88	96	QTMLFTMLR	9	Yes	3	0	2	3	2	2	1	1	1	1.23975
EpI_NSP8_119	HLA-I	NSP8	130	139	VVIPDYNTYK	10	No	3	0	2	3	2	2	1	1	1	1.23975
EpI_ORF10_23	HLA-I	ORF10	12	20	TIYSLLLCR	9	No	3	0	2	3	2	2	1	1	1	1.23975
EpI_ORF3a_134	HLA-I	ORF3a	117	126	SINFVRIIMR	10	No	3	0	2	3	2	2	1	1	1	1.23975
EpI_ORF3a_208	HLA-I	ORF3a	227	235	HVTFFIYNK	9	No	3	0	2	3	2	2	1	1	1	1.23975
EpI_S_26	HLA-I	S	35	44	GVYYPDKVFR	10	No	3	0	2	3	2	2	1	1	1	1.23975
EpI_S_114	HLA-I	S	142	150	GVYYHKNNK	9	No	3	0	2	3	2	2	1	1	1	1.23975
EpI_S_266	HLA-I	S	311	319	GIYQTSNFR	9	No	3	0	2	3	2	2	1	1	1	1.23975
EpI_S_312	HLA-I	S	349	357	SVYAWNRKR	9	No	3	0	2	3	2	2	1	1	1	1.23975
EpI_NSP15_228	HLA-I	NSP15	298	305	LLDDFVEI	8	Yes	2	0	2	2	3	1	1	2	4	1.23817
EpI_NSP3_70	HLA-I	NSP3	82	90	WSMATYYLF	9	No	2	0	4	3	2	1	1	2	2	1.23817
EpI_NSP3_329	HLA-I	NSP3	430	437	FLTENLLL	8	No	2	0	2	2	3	1	1	2	4	1.23817
EpI_NSP12_49	HLA-I	NSP12	80	89	YQHEETIYNL	10	No	1	0	1	2	1	1	2	2	6	1.23758
EpI_S_617	HLA-I	S	786	794	KQIYKTPPI	9	No	1	0	2	1	2	1	2	2	5	1.23758
EpI_S_784	HLA-I	S	1000	1008	RLQSLQTYV	9	Yes	1	0	1	1	2	1	2	2	6	1.23758
EpI_NSP9_15	HLA-I	NSP9	23	31	CTDDNALAY	9	Yes	3	0	4	4	4	0	2	1	1	1.23646
EpI_NSP3_806	HLA-I	NSP3	959	967	EQFKKGVQI	9	No	1	0	2	2	2	0	4	1	5	1.23529
EpI_NSP3_945	HLA-I	NSP3	1119	1126	FADDLNQL	8	No	1	0	5	2	3	0	2	1	6	1.23459
EpI_NSP12_23	HLA-I	NSP12	37	45	IYNDKVAGF	9	No	3	0	4	3	5	1	0	1	2	1.23408
EpI_NSP3_1422	HLA-I	NSP3	1735	1743	SAKSASVYY	9	No	1	0	2	3	4	1	3	0	2	1.2328
EpI_NSP3_1421	HLA-I	NSP3	1734	1743	SSAKSASVYY	10	No	2	0	2	3	3	1	3	0	2	1.22953
EpI_NSP6_42	HLA-I	NSP6	43	52	LPFAMGIIAM	10	No	2	0	3	2	2	0	3	2	3	1.22934
EpI_S_818	HLA-I	S	1052	1062	FPQSAPHGVVF	11	No	2	0	3	2	2	0	3	2	3	1.22934
EpI_NSP14_43	HLA-I	NSP14	65	73	QVNGYPNMF	9	No	1	0	3	1	5	0	3	1	4	1.22794
EpI_NSP14_233	HLA-I	NSP14	359	367	KAYKIEELF	9	No	1	0	3	1	5	0	3	1	4	1.22794
EpI_NSP3_1498	HLA-I	NSP3	1815	1823	FISAARQGF	9	No	1	0	3	1	5	0	3	1	4	1.22794
EpI_NSP8_75	HLA-I	NSP8	82	90	KVTSAMQTM	9	No	1	0	3	1	5	0	3	1	4	1.22794
EpI_NSP12_163	HLA-I	NSP12	236	244	SYYSLLMPI	9	No	3	0	4	3	3	1	0	2	2	1.22754
EpI_NSP3_326	HLA-I	NSP3	429	437	KFLTENLLL	9	No	3	0	4	3	3	1	0	2	2	1.22754
EpI_NSP3_974	HLA-I	NSP3	1153	1161	DYKHYTPSF	9	No	3	0	4	3	3	1	0	2	2	1.22754
EpI_NSP4_365	HLA-I	NSP4	390	398	FYWFFSNYL	9	No	3	0	4	3	3	1	0	2	2	1.22754
EpI_NSP16_116	HLA-I	NSP16	160	169	KLALGGSVAI	10	No	1	0	2	1	2	1	1	3	5	1.22369
EpI_NSP3_1374	HLA-I	NSP3	1671	1678	YIVDSVTV	8	No	1	0	2	1	2	1	1	3	5	1.22369
EpI_NSP3_1373	HLA-I	NSP3	1670	1678	SYIVDSVTV	9	No	3	0	3	4	3	1	0	1	4	1.22288
EpI_NSP3_1216	HLA-I	NSP3	1501	1509	TAFGLVAEW	9	No	1	0	3	1	3	0	3	2	4	1.22141
EpI_S_819	HLA-I	S	1052	1060	FPQSAPHGV	9	No	1	0	2	2	2	0	3	2	5	1.22141
EpI_NSP3_1350	HLA-I	NSP3	1647	1655	ISDEVARDL	9	No	2	0	6	2	5	0	0	2	4	1.22129
EpI_S_474	HLA-I	S	576	584	VRDPQTLEI	9	No	2	0	3	3	4	0	0	2	7	1.22129
EpI_NSP8_81	HLA-I	NSP8	86	94	AMQTMLFTM	9	Yes	1	0	2	1	3	1	1	2	6	1.21902
EpI_ORF6_37	HLA-I	ORF6	28	36	NLDYIINLI	9	No	1	0	1	2	2	1	1	2	7	1.21902
EpI_NSP8_107	HLA-I	NSP8	120	128	IPLTTAAKL	9	Yes	1	0	2	2	3	0	3	1	6	1.21674
EpI_NSP12_496	HLA-I	NSP12	647	655	SLSHRFYRL	9	No	2	0	2	1	2	1	1	2	6	1.21576
EpI_NSP12_66	HLA-I	NSP12	96	104	VAKHDFFKF	9	No	1	0	3	1	3	1	3	1	2	1.21506
EpI_ORF10_19	HLA-I	ORF10	9	16	FPFTIYSL	8	No	2	0	2	2	2	0	3	1	6	1.21347
EpI_NSP12_653	HLA-I	NSP12	829	838	LPYPDPSRIL	10	Yes	2	0	3	2	3	0	2	2	4	1.21078
EpI_NSP2_198	HLA-I	NSP2	300	307	FSASTSAF	8	No	2	0	4	1	4	0	2	2	3	1.21078
EpI_NSP3_1558	HLA-I	NSP3	1934	1942	NVVTTKIAL	9	No	0	0	2	1	4	0	3	1	7	1.2088
EpI_S_326	HLA-I	S	369	377	YNSASFSTF	9	No	0	0	2	1	4	0	3	1	7	1.2088
EpI_NSP6_161	HLA-I	NSP6	141	149	TLMNVLTLV	9	No	1	0	1	1	2	1	1	2	8	1.20782
EpI_N_5	HLA-I	N	9	17	QRNAPRITF	9	No	3	0	4	4	4	0	1	1	3	1.2067
EpI_NSP2_287	HLA-I	NSP2	396	404	YSLRLIDAM	9	No	1	0	3	1	4	0	2	2	5	1.20285
EpI_NSP6_51	HLA-I	NSP6	49	57	IIAMSAFAM	9	No	1	0	3	1	4	0	2	2	5	1.20285
EpI_NSP13_385	HLA-I	NSP13	513	521	SPYNSQNAV	9	Yes	1	0	3	2	4	0	2	1	6	1.19818
EpI_NSP15_49	HLA-I	NSP15	64	72	KPVPEVKIL	9	No	1	0	3	2	4	0	2	1	6	1.19818
EpI_NSP3_123	HLA-I	NSP3	186	194	TIVEVQPQL	9	No	0	0	2	0	4	0	3	1	8	1.1976
EpI_NSP5_111	HLA-I	NSP5	192	200	QAAGTDTTI	9	No	0	0	3	0	4	0	3	1	7	1.1976
EpI_NSP6_26	HLA-I	NSP6	34	42	FFFLYENAF	9	No	3	0	4	5	3	0	0	2	3	1.19281
EpI_NSP2_111	HLA-I	NSP2	179	188	YLPQNAVVKI	10	No	1	0	1	1	2	1	2	2	5	1.18996
EpI_E_44	HLA-I	E	51	59	LVKPSFYVY	9	No	2	0	3	3	3	0	3	1	2	1.18826
EpI_ORF3a_1	HLA-I	ORF3a	2	10	DLFMRIFTI	9	No	2	0	2	1	1	1	2	2	4	1.18669
EpI_NSP5_23	HLA-I	NSP5	49	57	MLNPNYEDL	9	No	1	0	3	2	4	0	1	2	6	1.18429
EpI_NSP12_383	HLA-I	NSP12	520	528	SYEDQDALF	9	Yes	3	0	3	3	3	1	0	2	2	1.17993
EpI_NSP4_381	HLA-I	NSP4	402	409	VVFNGVSF	8	No	0	0	2	0	4	0	4	1	5	1.17974
EpI_S_806	HLA-I	S	1021	1029	SANLAATKM	9	No	0	0	2	0	4	0	4	1	5	1.17974
EpI_S_907	HLA-I	S	1189	1197	VAKNLNESL	9	No	0	0	2	0	4	0	4	1	5	1.17974
EpI_NSP3_113	HLA-I	NSP3	161	170	WLDDDSQQTV	10	No	2	0	2	2	2	1	1	2	4	1.17934
EpI_NSP4_408	HLA-I	NSP4	429	438	KLRSDVLLPL	10	No	2	0	2	2	2	1	1	2	4	1.17934
EpI_NSP12_587	HLA-I	NSP12	756	764	MILSDDAVV	9	No	1	0	2	1	2	1	1	3	4	1.17607
EpI_NSP3_825	HLA-I	NSP3	986	994	FVMMSAPPA	9	No	1	0	2	1	2	1	1	3	4	1.17607
EpI_NSP2_149	HLA-I	NSP2	224	231	IAFGGCVF	8	No	1	0	3	1	3	0	3	2	3	1.17379
EpI_NSP3_1075	HLA-I	NSP3	1309	1317	LAAVNSVPW	9	No	1	0	3	1	3	0	3	2	3	1.17379
EpI_NSP2_301	HLA-I	NSP2	407	415	TSDLATNNL	9	No	2	0	4	2	5	0	0	2	5	1.17367
EpI_NSP3_919	HLA-I	NSP3	1088	1096	YFTEQPIDL	9	No	2	0	3	3	4	0	0	2	6	1.17367
EpI_NSP16_20	HLA-I	NSP16	14	22	LYKMQRMLL	9	No	4	0	5	3	3	1	0	1	1	1.17199
EpI_M_19	HLA-I	M	18	26	EQWNLVIGF	9	Yes	3	0	2	3	2	0	3	0	5	1.16912
EpI_NSP2_252	HLA-I	NSP2	360	368	AARVVRSIF	9	No	1	0	3	1	4	0	3	1	4	1.16912
EpI_NSP3_1037	HLA-I	NSP3	1260	1268	KPANNSLKI	9	No	1	0	3	1	4	0	3	1	4	1.16912
EpI_NSP4_71	HLA-I	NSP4	93	101	AVITREVGF	9	No	1	0	3	1	4	0	3	1	4	1.16912
EpI_NSP4_86	HLA-I	NSP4	103	111	VPGLPGTIL	9	No	1	0	2	2	3	0	3	1	5	1.16912
EpI_NSP3_505	HLA-I	NSP3	605	613	YFYTSKTTV	9	No	2	0	4	3	5	0	0	1	6	1.169
EpI_NSP13_303	HLA-I	NSP13	403	411	AQLPAPRTL	9	No	1	0	3	2	4	0	1	1	8	1.16842
EpI_NSP14_280	HLA-I	NSP14	423	431	KHAFHTPAF	9	No	2	0	3	3	4	1	0	1	4	1.16732
EpI_ORF10_15	HLA-I	ORF10	8	16	AFPFTIYSL	9	No	2	0	4	3	4	1	0	1	3	1.16732
EpI_NSP3_1290	HLA-I	NSP3	1564	1572	RMYIFFASF	9	Yes	1	0	3	2	3	1	1	1	5	1.16674
EpI_NSP6_56	HLA-I	NSP6	51	59	AMSAFAMMF	9	No	1	0	3	2	3	1	1	1	5	1.16674
EpI_S_132	HLA-I	S	162	170	SANNCTFEY	9	No	3	0	4	3	3	0	2	1	2	1.16643
EpI_NSP3_1193	HLA-I	NSP3	1478	1486	DSLDTYPSL	9	No	0	0	2	1	4	0	3	1	6	1.16118
EpI_E_41	HLA-I	E	50	58	SLVKPSFYV	9	No	1	0	1	1	2	1	1	2	7	1.1602
EpI_NSP3_1204	HLA-I	NSP3	1485	1493	SLETIQITI	9	No	1	0	1	1	2	1	1	2	7	1.1602
EpI_NSP4_101	HLA-I	NSP4	121	129	FLPRVFSAV	9	Yes	1	0	1	1	2	1	1	2	7	1.1602
EpI_NSP16_55	HLA-I	NSP16	59	67	LAVPYNMRV	9	No	2	0	5	2	5	0	0	1	6	1.1578
EpI_NSP12_133	HLA-I	NSP12	184	192	QALLKTVQF	9	No	1	0	3	1	4	0	2	2	4	1.15523
EpI_NSP12_526	HLA-I	NSP12	687	694	TAYANSVF	8	No	1	0	3	1	4	0	2	2	4	1.15523
EpI_NSP12_650	HLA-I	NSP12	828	837	YLPYPDPSRI	10	Yes	0	0	1	0	3	0	3	2	7	1.15465
EpI_S_900	HLA-I	S	1181	1189	KEIDRLNEV	9	No	1	0	1	2	2	1	3	0	5	1.15156
EpI_NSP3_91	HLA-I	NSP3	121	129	EEFEPSTQY	9	No	2	0	1	1	2	0	5	0	4	1.15068
EpI_NSP12_401	HLA-I	NSP12	536	544	IPTITQMNL	9	Yes	1	0	3	2	4	0	2	1	5	1.15056
EpI_NSP14_80	HLA-I	NSP14	124	133	YVDTPNNTDF	10	No	1	0	3	1	5	0	2	1	5	1.15056
EpI_NSP3_1058	HLA-I	NSP3	1287	1295	LTIKKPNEL	9	No	1	0	3	1	5	0	2	1	5	1.15056
EpI_NSP2_266	HLA-I	NSP2	374	382	TAQNSVRVL	9	No	0	0	3	0	4	0	3	1	6	1.14998
EpI_NSP6_281	HLA-I	NSP6	267	275	DAFKLNIKL	9	No	0	0	2	1	3	0	3	1	7	1.14998
EpI_NSP3_713	HLA-I	NSP3	838	846	WKYPQVNGL	9	No	3	0	3	4	3	0	1	1	4	1.14788
EpI_NSP4_12	HLA-I	NSP4	17	25	FLFVAAIFY	9	No	3	0	3	4	2	1	1	1	1	1.1462
EpI_NSP12_349	HLA-I	NSP12	462	470	TMCDIRQLL	9	No	1	0	1	2	1	1	2	2	4	1.14234
EpI_S_429	HLA-I	S	503	511	VGYQPYRVV	9	No	2	0	4	2	5	0	1	1	4	1.13994
EpI_E_51	HLA-I	E	61	69	RVKNLNSSR	9	No	2	0	1	3	2	2	1	1	1	1.13658
EpI_NSP15_204	HLA-I	NSP15	249	257	HLLIGLAKR	9	No	2	0	1	3	2	2	1	1	1	1.13658
EpI_NSP3_1278	HLA-I	NSP3	1555	1564	QMAPISAMVR	10	No	2	0	1	3	2	2	1	1	1	1.13658
EpI_NSP8_1	HLA-I	NSP8	1	9	AIASEFSSL	9	No	0	0	2	0	4	0	2	2	7	1.13609
EpI_NSP3_1210	HLA-I	NSP3	1488	1496	TIQITISSF	9	No	0	0	2	0	4	0	4	1	4	1.13212
EpI_ORF3a_202	HLA-I	ORF3a	223	231	TGVEHVTFF	9	No	0	0	2	0	4	0	4	1	4	1.13212
EpI_ORF7a_95	HLA-I	ORF7a	104	112	VAAIVFITL	9	No	0	0	2	1	4	0	2	1	8	1.13142
EpI_NSP3_1273	HLA-I	NSP3	1554	1563	VQMAPISAMV	10	No	1	0	1	1	1	1	2	2	5	1.13114
EpI_NSP5_146	HLA-I	NSP5	226	234	TLNDFNLVA	9	No	1	0	1	1	1	1	2	2	5	1.13114
EpI_NSP6_105	HLA-I	NSP6	85	94	YMPASWVMRI	10	Yes	1	0	1	1	1	1	2	2	5	1.13114
EpI_ORF8_69	HLA-I	ORF8	108	117	FLEYHDVRVV	10	No	1	0	1	1	1	1	2	2	5	1.13114
EpI_NSP4_185	HLA-I	NSP4	212	220	VVTTFDSEY	9	No	1	0	1	3	2	1	3	1	1	1.13102
EpI_M_209	HLA-I	M	213	221	SSDNIALLV	9	No	3	0	5	3	5	0	0	1	3	1.12932
EpI_NSP3_1403	HLA-I	NSP3	1710	1718	RANNTKGSL	9	No	2	0	6	2	4	0	1	1	3	1.12873
EpI_NSP14_250	HLA-I	NSP14	376	384	KFTDGVCLF	9	Yes	3	0	4	4	3	1	0	1	1	1.12764
EpI_NSP16_194	HLA-I	NSP16	233	242	NTNPIQLSSY	10	Yes	1	0	1	3	3	1	3	0	2	1.12635
EpI_NSP3_893	HLA-I	NSP3	1055	1064	YTTTIKPVTY	10	No	1	0	1	3	3	1	3	0	2	1.12635
EpI_NSP3_1251	HLA-I	NSP3	1525	1533	LAAIMQLFF	9	No	1	0	3	1	3	0	3	2	2	1.12617
EpI_NSP13_335	HLA-I	NSP13	448	455	IVDTVSAL	8	Yes	2	0	4	2	5	0	0	2	4	1.12605
EpI_NSP3_18	HLA-I	NSP3	19	27	KSVNITFEL	9	No	1	0	4	1	4	0	1	2	5	1.12547
EpI_NSP3_1336	HLA-I	NSP3	1617	1626	YVYANGGKGF	10	No	1	0	3	1	4	0	3	1	3	1.1215
EpI_M_115	HLA-I	M	111	119	SFNPETNIL	9	Yes	2	0	4	3	5	0	0	1	5	1.12138
EpI_NSP1_127	HLA-I	NSP1	141	149	KSFDLGDEL	9	No	1	0	4	2	4	0	1	1	6	1.1208
EpI_NSP14_7	HLA-I	NSP14	21	29	TQAPTHLSV	9	No	1	0	3	2	4	0	1	1	7	1.1208
EpI_S_279	HLA-I	S	326	335	IVRFPNITNL	10	Yes	1	0	3	2	4	0	1	1	7	1.1208
EpI_NSP3_559	HLA-I	NSP3	663	671	DAVTAYNGY	9	No	1	0	1	2	2	1	3	1	2	1.11982
EpI_E_4	HLA-I	E	5	13	VSEETGTLI	9	No	2	0	4	2	4	0	0	2	5	1.11485
EpI_NSP3_1194	HLA-I	NSP3	1479	1486	SLDTYPSL	8	No	2	0	2	2	3	1	0	2	4	1.11317
EpI_E_20	HLA-I	E	20	28	FLAFVVFLL	9	Yes	1	0	1	1	2	1	1	2	6	1.11258
EpI_NSP12_245	HLA-I	NSP12	334	341	FVDGVPFV	8	Yes	1	0	1	1	2	1	1	2	6	1.11258
EpI_NSP12_351	HLA-I	NSP12	467	475	RQLLFVVEV	9	Yes	1	0	1	2	1	1	1	2	6	1.11258
EpI_NSP2_281	HLA-I	NSP2	389	398	ILDGISQYSL	10	No	1	0	1	1	2	1	1	2	6	1.11258
EpI_NSP6_21	HLA-I	NSP6	29	37	TQWSLFFFL	9	No	1	0	1	2	1	1	1	2	6	1.11258
EpI_NSP3_794	HLA-I	NSP3	949	958	AVMYMGTLSY	10	Yes	2	0	2	2	2	1	3	0	2	1.11188
EpI_NSP3_1253	HLA-I	NSP3	1527	1535	AIMQLFFSY	9	No	2	0	2	2	2	1	3	0	2	1.11188
EpI_NSP2_295	HLA-I	NSP2	402	410	DAMMFTSDL	9	No	2	0	3	1	1	0	3	2	3	1.11169
EpI_NSP5_94	HLA-I	NSP5	159	167	FCYMHHMEL	9	No	3	0	5	1	4	0	0	2	4	1.11158
EpI_NSP12_536	HLA-I	NSP12	700	708	VTANVNALL	9	No	1	0	4	1	4	0	1	1	7	1.10959
EpI_NSP3_138	HLA-I	NSP3	197	205	ELTPVVQTI	9	No	1	0	2	2	3	0	1	1	9	1.10959
EpI_NSP16_49	HLA-I	NSP16	55	63	NTLTLAVPY	9	Yes	2	0	2	3	2	1	2	1	1	1.1092
EpI_NSP3_126	HLA-I	NSP3	188	196	VEVQPQLEM	9	No	0	0	0	1	1	1	4	0	6	1.10336
EpI_NSP14_108	HLA-I	NSP14	161	169	VVRIKIVQM	9	No	1	0	3	1	5	0	2	1	4	1.10294
EpI_NSP15_92	HLA-I	NSP15	126	134	RVDGQVDLF	9	No	1	0	3	1	5	0	2	1	4	1.10294
EpI_NSP12_524	HLA-I	NSP12	686	694	TTAYANSVF	9	No	0	0	2	0	4	0	3	1	6	1.10236
EpI_NSP3_1167	HLA-I	NSP3	1428	1436	STAALGVLM	9	No	0	0	2	0	4	0	3	1	6	1.10236
EpI_S_503	HLA-I	S	634	643	RVYSTGSNVF	10	No	0	0	3	0	4	0	3	1	5	1.10236
EpI_S_951	HLA-I	S	1225	1233	IAIVMVTIM	9	No	0	0	2	0	4	0	3	1	6	1.10236
EpI_NSP15_65	HLA-I	NSP15	88	96	YKRDAPAHI	9	No	3	0	3	4	3	0	1	1	3	1.10026
EpI_NSP3_951	HLA-I	NSP3	1129	1137	YKKPASREL	9	No	3	0	3	4	3	0	1	1	3	1.10026
EpI_S_621	HLA-I	S	789	797	YKTPPIKDF	9	No	3	0	3	4	3	0	1	1	3	1.10026
EpI_NSP3_889	HLA-I	NSP3	1051	1059	KENSYTTTI	9	No	1	0	1	1	2	1	3	0	5	1.09274
EpI_S_800	HLA-I	S	1016	1024	AEIRASANL	9	Yes	1	0	1	1	2	1	3	0	5	1.09274
EpI_NSP3_790	HLA-I	NSP3	945	953	KGVEAVMYM	9	No	2	0	4	2	5	0	1	1	3	1.09232
EpI_NSP12_279	HLA-I	NSP12	375	383	AADPAMHAA	9	No	1	0	4	1	4	0	2	1	4	1.09174
EpI_NSP3_1085	HLA-I	NSP3	1320	1328	IANYAKPFL	9	No	1	0	4	1	4	0	2	1	4	1.09174
EpI_NSP2_433	HLA-I	NSP2	559	567	IIFLEGETL	9	No	0	0	2	0	3	0	3	1	7	1.09115
EpI_NSP3_895	HLA-I	NSP3	1056	1064	TTTIKPVTY	9	No	2	0	3	3	4	0	3	0	1	1.08835
EpI_NSP12_534	HLA-I	NSP12	699	707	AVTANVNAL	9	No	0	0	2	1	4	0	2	1	7	1.0838
EpI_NSP15_110	HLA-I	NSP15	159	167	QASLNGVTL	9	No	0	0	2	1	4	0	2	1	7	1.0838
EpI_N_169	HLA-I	N	316	324	GMSRIGMEV	9	Yes	1	0	1	1	1	1	2	2	4	1.08352
EpI_NSP14_69	HLA-I	NSP14	107	115	LQLGFSTGV	9	Yes	1	0	1	1	1	1	2	2	4	1.08352
EpI_NSP3_157	HLA-I	NSP3	213	222	YLKLTDNVYI	10	No	1	0	1	1	1	1	2	2	4	1.08352
EpI_NSP3_676	HLA-I	NSP3	801	811	YVLPNDDTLRV	11	No	1	0	1	1	1	1	2	2	4	1.08352
EpI_NSP3_679	HLA-I	NSP3	802	811	VLPNDDTLRV	10	No	1	0	1	1	1	1	2	2	4	1.08352
EpI_NSP3_1452	HLA-I	NSP3	1771	1779	KMFDAYVNT	9	No	1	0	1	1	1	1	2	2	4	1.08352
EpI_ORF3a_45	HLA-I	ORF3a	51	59	ALLAVFQSA	9	No	1	0	1	1	1	1	2	2	4	1.08352
EpI_S_648	HLA-I	S	821	829	LLFNKVTLA	9	Yes	1	0	1	1	1	1	2	2	4	1.08352
EpI_S_779	HLA-I	S	995	1004	RLITGRLQSL	10	Yes	1	0	1	1	1	1	2	2	4	1.08352
EpI_S_814	HLA-I	S	1048	1056	HLMSFPQSA	9	No	1	0	1	1	1	1	2	2	4	1.08352
EpI_NSP2_305	HLA-I	NSP2	411	420	ATNNLVVMAY	10	No	3	0	3	3	3	1	1	0	2	1.0827
EpI_M_139	HLA-I	M	136	144	SELVIGAVI	9	Yes	2	0	1	2	2	1	2	0	5	1.08212
EpI_NSP3_1227	HLA-I	NSP3	1507	1515	AEWFLAYIL	9	No	2	0	1	2	2	1	2	0	5	1.08212
EpI_NSP12_86	HLA-I	NSP12	122	129	YTMADLVY	8	Yes	2	0	2	3	2	0	3	1	2	1.08182
EpI_NSP12_518	HLA-I	NSP12	680	689	TSSGDATTAY	10	Yes	2	0	2	3	2	0	3	1	2	1.08182
EpI_NSP3_832	HLA-I	NSP3	989	996	MSAPPAQY	8	No	2	0	2	3	2	0	3	1	2	1.08182
EpI_NSP4_438	HLA-I	NSP4	454	463	FSGAMDTTSY	10	No	2	0	2	3	2	0	3	1	2	1.08182
EpI_N_220	HLA-I	N	399	407	DLDDFSKQL	9	No	2	0	3	3	3	0	1	1	5	1.08112
EpI_NSP15_98	HLA-I	NSP15	134	142	FRNARNGVL	9	No	4	0	4	4	3	0	0	1	3	1.07843
EpI_S_396	HLA-I	S	453	461	YRLFRKSNL	9	No	4	0	4	4	3	0	0	1	3	1.07843
EpI_NSP3_316	HLA-I	NSP3	417	425	CVEEVTTTL	9	No	1	0	3	1	4	0	1	2	5	1.07785
EpI_S_381	HLA-I	S	444	452	KVGGNYNYL	9	No	1	0	3	1	4	0	1	2	5	1.07785
EpI_E_27	HLA-I	E	29	37	VTLAILTAL	9	Yes	0	0	2	0	3	0	2	2	7	1.07726
EpI_NSP3_122	HLA-I	NSP3	182	190	TTIQTIVEV	9	No	0	0	2	0	3	0	2	2	7	1.07726
EpI_NSP3_227	HLA-I	NSP3	317	325	YENFNQHEV	9	No	1	0	1	2	2	1	2	0	6	1.07418
EpI_S_137	HLA-I	S	168	176	FEYVSQPFL	9	No	1	0	1	2	2	1	2	0	6	1.07418
EpI_ORF3a_99	HLA-I	ORF3a	101	109	LEAPFLYLY	9	No	3	0	2	3	2	0	3	0	3	1.07388
EpI_S_823	HLA-I	S	1055	1063	SAPHGVVFL	9	No	1	0	3	2	4	0	1	1	6	1.07318
EpI_S_700	HLA-I	S	896	905	IPFAMQMAYR	10	No	1	0	0	2	2	1	3	1	2	1.0722
EpI_NSP10_7	HLA-I	NSP10	7	16	VPANSTVLSF	10	Yes	2	0	3	2	2	0	3	1	2	1.07061
EpI_NSP15_108	HLA-I	NSP15	154	162	SVGPKQASL	9	No	2	0	5	1	4	0	1	1	4	1.06991
EpI_N_41	HLA-I	N	86	94	YYRRATRRI	9	No	3	0	4	3	3	1	0	1	1	1.06881
EpI_NSP14_335	HLA-I	NSP14	493	501	LYLDAYNMM	9	No	3	0	4	3	3	1	0	1	1	1.06881
EpI_NSP3_1307	HLA-I	NSP3	1572	1580	FYYVWKSYV	9	No	3	0	4	3	3	1	0	1	1	1.06881
EpI_NSP4_176	HLA-I	NSP4	204	212	TYLEGSVRV	9	No	3	0	4	3	3	1	0	1	1	1.06881
EpI_S_857	HLA-I	S	1101	1109	HWFVTQRNF	9	No	3	0	4	3	3	1	0	1	1	1.06881
EpI_NSP3_681	HLA-I	NSP3	803	811	LPNDDTLRV	9	No	1	0	2	1	2	0	3	2	3	1.06734
EpI_NSP3_716	HLA-I	NSP3	840	849	YPQVNGLTSI	10	No	1	0	1	2	1	0	4	0	6	1.06536
EpI_NSP13_392	HLA-I	NSP13	525	533	ILGLPTQTV	9	Yes	1	0	1	1	2	1	1	2	5	1.06496
EpI_NSP13_429	HLA-I	NSP13	584	592	KLQFTSLEI	9	No	1	0	1	1	2	1	1	2	5	1.06496
EpI_NSP3_446	HLA-I	NSP3	549	557	ILGTVSWNL	9	Yes	1	0	1	1	2	1	1	2	5	1.06496
EpI_NSP3_730	HLA-I	NSP3	862	870	LLTLQQIEL	9	No	1	0	1	1	2	1	1	2	5	1.06496
EpI_NSP3_1296	HLA-I	NSP3	1566	1575	YIFFASFYYV	10	Yes	1	0	1	2	1	1	1	2	5	1.06496
EpI_NSP3_1429	HLA-I	NSP3	1745	1753	QLMCQPILL	9	Yes	1	0	1	1	2	1	1	2	5	1.06496
EpI_NSP4_213	HLA-I	NSP4	263	271	LLTNMFTPL	9	No	1	0	1	1	2	1	1	2	5	1.06496
EpI_NSP5_45	HLA-I	NSP5	81	89	SMQNCVLKL	9	No	1	0	1	1	2	1	1	2	5	1.06496
EpI_S_502	HLA-I	S	634	642	RVYSTGSNV	9	No	1	0	3	1	4	0	1	1	7	1.06197
EpI_NSP3_584	HLA-I	NSP3	697	705	SYSGQSTQL	9	No	2	0	2	3	3	1	0	1	4	1.06088
EpI_M_84	HLA-I	M	76	84	ITGGIAIAM	9	No	0	0	2	0	4	0	3	1	5	1.05474
EpI_NSP3_462	HLA-I	NSP3	563	571	HAEETRKLM	9	No	0	0	2	0	4	0	3	1	5	1.05474
EpI_NSP4_273	HLA-I	NSP4	315	322	VAFNTLLF	8	No	0	0	3	0	4	0	3	1	4	1.05474
EpI_NSP8_147	HLA-I	NSP8	166	174	IVQLSEISM	9	No	0	0	2	0	4	0	3	1	5	1.05474
EpI_NSP3_432	HLA-I	NSP3	534	542	AFYILPSII	9	No	2	0	3	2	2	1	0	2	3	1.05434
EpI_M_14	HLA-I	M	15	23	KLLEQWNLV	9	No	1	0	1	1	1	1	1	2	6	1.05376
EpI_NSP12_510	HLA-I	NSP12	666	675	MVMCGGSLYV	10	Yes	1	0	1	1	1	1	1	2	6	1.05376
EpI_NSP13_159	HLA-I	NSP13	239	247	TLVPQEHYV	9	Yes	1	0	1	1	1	1	1	2	6	1.05376
EpI_NSP3_397	HLA-I	NSP3	494	502	MLAKALRKV	9	No	1	0	1	1	1	1	1	2	6	1.05376
EpI_NSP4_330	HLA-I	NSP4	359	367	FLAHIQWMV	9	No	1	0	1	1	1	1	1	2	6	1.05376
EpI_NSP6_90	HLA-I	NSP6	76	84	ATVAYFNMV	9	Yes	1	0	1	1	1	1	1	2	6	1.05376
EpI_ORF7a_67	HLA-I	ORF7a	85	93	KLFIRQEEV	9	Yes	1	0	1	1	1	1	1	2	6	1.05376
EpI_NSP13_18	HLA-I	NSP13	56	64	DVTDVTQLY	9	No	1	0	1	3	2	1	2	1	2	1.05364
EpI_NSP13_125	HLA-I	NSP13	208	217	AVVYRGTTTY	10	Yes	2	0	2	1	2	1	3	0	2	1.05306
EpI_NSP15_27	HLA-I	NSP15	40	49	VELFENKTTL	10	No	0	0	1	1	3	1	1	1	7	1.05236
EpI_NSP3_540	HLA-I	NSP3	643	651	EAARYMRSL	9	No	1	0	3	0	3	0	3	1	4	1.05147
EpI_NSP8_130	HLA-I	NSP8	148	156	TYASALWEI	9	Yes	2	0	3	3	2	1	0	1	4	1.04967
EpI_NSP5_80	HLA-I	NSP5	129	137	AMRPNFTIK	9	No	3	0	2	2	1	1	2	1	1	1.04711
EpI_NSP3_780	HLA-I	NSP3	916	923	YLFQHANL	8	No	1	0	2	1	3	1	0	2	5	1.04641
EpI_NSP12_184	HLA-I	NSP12	263	271	KPYIKWDLL	9	No	1	0	3	2	3	0	2	1	4	1.04412
EpI_ORF3a_50	HLA-I	ORF3a	54	62	AVFQSASKI	9	No	1	0	3	1	4	0	2	1	4	1.04412
EpI_S_540	HLA-I	S	689	697	SQSIIAYTM	9	No	0	0	2	1	2	0	3	1	6	1.04353
EpI_M_187	HLA-I	M	191	199	SGFAAYSRY	9	No	1	0	2	2	3	0	4	0	2	1.04015
EpI_NSP8_94	HLA-I	NSP8	102	110	ALNNIINNA	9	No	1	0	1	1	1	1	2	2	3	1.0359
EpI_NSP2_419	HLA-I	NSP2	545	553	EETGLLMPL	9	No	2	0	1	2	2	1	2	0	4	1.0345
EpI_NSP6_35	HLA-I	NSP6	38	47	YENAFLPFAM	10	No	2	0	1	2	2	1	2	0	4	1.0345
EpI_NSP3_231	HLA-I	NSP3	319	327	NFNQHEVLL	9	No	3	0	3	4	4	0	0	1	3	1.03408
EpI_S_639	HLA-I	S	815	823	RSFIEDLLF	9	No	1	0	4	1	3	0	2	1	4	1.03291
EpI_NSP1_97	HLA-I	NSP1	106	114	VLVPHVGEI	9	No	0	0	2	0	3	0	2	2	6	1.02965
EpI_ORF6_12	HLA-I	ORF6	9	17	VTIAEILLI	9	No	0	0	2	0	3	0	2	2	6	1.02965
EpI_NSP12_207	HLA-I	NSP12	286	294	YFKYWDQTY	9	Yes	2	0	2	3	3	0	3	0	2	1.02953
EpI_NSP1_62	HLA-I	NSP1	76	85	ARTAPHGHVM	10	No	1	0	3	2	4	0	1	1	5	1.02556
EpI_NSP12_93	HLA-I	NSP12	124	131	MADLVYAL	8	Yes	1	0	3	2	4	0	1	1	5	1.02556
EpI_NSP12_146	HLA-I	NSP12	199	207	AGIVGVLTL	9	No	1	0	3	2	4	0	1	1	5	1.02556
EpI_NSP2_390	HLA-I	NSP2	512	520	SIIIGGAKL	9	No	0	0	2	0	4	0	2	1	7	1.02498
EpI_NSP3_1477	HLA-I	NSP3	1794	1802	LVATAEAEL	9	No	0	0	2	0	4	0	2	1	7	1.02498
EpI_N_33	HLA-I	N	79	87	SPDDQIGYY	9	No	2	0	2	2	2	0	3	1	2	1.02299
EpI_NSP3_543	HLA-I	NSP3	645	653	ARYMRSLKV	9	No	3	0	3	4	3	0	0	1	4	1.02288
EpI_NSP4_404	HLA-I	NSP4	427	435	YLKLRSDVL	9	No	2	0	4	1	4	0	1	1	4	1.02229
EpI_ORF3a_12	HLA-I	ORF3a	8	15	FTIGTVTL	8	No	2	0	3	1	4	0	1	1	5	1.02229
EpI_NSP14_24	HLA-I	NSP14	50	58	TYRRLISMM	9	No	3	0	3	3	3	1	0	1	1	1.0212
EpI_NSP14_167	HLA-I	NSP14	236	244	VYNPFMIDV	9	No	3	0	3	3	3	1	0	1	1	1.0212
EpI_NSP3_670	HLA-I	NSP3	793	801	NSHEGKTFY	9	No	1	0	1	2	3	1	3	0	1	1.01991
EpI_NSP2_322	HLA-I	NSP2	433	441	LTNIFGTVY	9	No	2	0	3	2	3	0	3	0	2	1.01832
EpI_S_665	HLA-I	S	853	861	QKFNGLTVL	9	No	2	0	2	3	2	0	3	0	3	1.01832
EpI_NSP12_167	HLA-I	NSP12	238	247	YSLLMPILTL	10	No	1	0	1	1	2	1	1	2	4	1.01734
EpI_ORF3a_37	HLA-I	ORF3a	40	48	SLPFGWLIV	9	No	1	0	1	1	2	1	1	2	4	1.01734
EpI_ORF3a_88	HLA-I	ORF3a	93	101	HLLLVAAGL	9	No	1	0	1	2	1	1	1	2	4	1.01734
EpI_NSP3_1483	HLA-I	NSP3	1800	1808	AELAKNVSL	9	No	1	0	1	1	2	1	2	0	6	1.01536
EpI_NSP4_2	HLA-I	NSP4	2	10	IVNNWLKQL	9	No	2	0	4	2	5	0	0	1	4	1.01494
EpI_M_114	HLA-I	M	110	118	WSFNPETNI	9	Yes	1	0	4	1	4	0	1	1	5	1.01436
EpI_NSP13_246	HLA-I	NSP13	332	340	RIIPARARV	9	No	1	0	3	1	4	0	1	1	6	1.01436
EpI_NSP15_237	HLA-I	NSP15	312	320	SVVSKVVKV	9	No	1	0	3	1	4	0	1	1	6	1.01436
EpI_NSP3_50	HLA-I	NSP3	63	71	KTLQPVSEL	9	No	1	0	4	1	4	0	1	1	5	1.01436
EpI_NSP3_203	HLA-I	NSP3	273	281	IATNGPLKV	9	No	1	0	4	1	4	0	1	1	5	1.01436
EpI_NSP12_669	HLA-I	NSP12	853	862	TLMIERFVSL	10	Yes	2	0	2	1	1	1	1	2	3	1.01408
EpI_NSP14_183	HLA-I	NSP14	274	282	AIMTRCLAV	9	Yes	2	0	2	1	1	1	1	2	3	1.01408
EpI_NSP2_351	HLA-I	NSP2	461	468	FLRDGWEI	8	No	2	0	2	1	1	1	1	2	3	1.01408
EpI_S_138	HLA-I	S	169	177	EYVSQPFLM	9	No	2	0	3	4	2	1	0	1	2	1.01326
EpI_NSP2_49	HLA-I	NSP2	78	86	KLAKKFDTF	9	No	1	0	2	1	3	1	1	1	4	1.01268
EpI_NSP12_593	HLA-I	NSP12	762	770	AVVCFNSTY	9	No	1	0	1	2	2	1	3	0	2	1.00871
EpI_NSP3_827	HLA-I	NSP3	987	996	VMMSAPPAQY	10	No	1	0	1	2	2	1	3	0	2	1.00871
EpI_NSP3_1378	HLA-I	NSP3	1677	1686	TVKNGSIHLY	10	No	1	0	1	2	2	1	3	0	2	1.00871
EpI_NSP5_71	HLA-I	NSP5	110	118	QTFSVLACY	9	Yes	1	0	1	2	2	1	3	0	2	1.00871
EpI_S_961	HLA-I	S	1264	1272	VLKGVKLHY	9	No	1	0	1	2	2	1	3	0	2	1.00871
EpI_S_162	HLA-I	S	202	210	KIYSKHTPI	9	No	1	0	3	0	3	0	1	2	6	1.00782
EpI_E_12	HLA-I	E	12	20	LIVNSVLLF	9	Yes	0	0	3	1	3	0	3	1	3	1.00712
EpI_NSP12_223	HLA-I	NSP12	319	326	TVFPPTSF	8	No	0	0	2	0	4	0	3	1	4	1.00712
EpI_NSP12_662	HLA-I	NSP12	847	855	IVKTDGTLM	9	No	0	0	2	0	4	0	3	1	4	1.00712
EpI_NSP13_269	HLA-I	NSP13	370	378	IVVFDEISM	9	No	0	0	2	0	4	0	3	1	4	1.00712
EpI_NSP3_1546	HLA-I	NSP3	1914	1922	AAKKNNLPF	9	No	0	0	2	0	4	0	3	1	4	1.00712
EpI_NSP5_69	HLA-I	NSP5	107	115	QPGQTFSVL	9	No	2	0	2	2	2	0	3	0	4	1.00712
EpI_NSP8_97	HLA-I	NSP8	109	117	NARDGCVPL	9	No	0	0	2	0	4	0	3	1	4	1.00712
EpI_ORF8_10	HLA-I	ORF8	8	16	GIITTVAAF	9	No	0	0	2	0	4	0	3	1	4	1.00712
EpI_S_229	HLA-I	S	266	275	YVGYLQPRTF	10	No	0	0	2	0	4	0	3	1	4	1.00712
EpI_S_687	HLA-I	S	880	888	GTITSGWTF	9	No	0	0	2	1	3	0	3	1	4	1.00712
EpI_M_16	HLA-I	M	16	24	LLEQWNLVI	9	No	2	0	2	2	2	1	0	2	3	1.00672
EpI_NSP1_124	HLA-I	NSP1	135	143	SYGADLKSF	9	No	2	0	3	2	2	1	0	2	2	1.00672
EpI_NSP6_32	HLA-I	NSP6	37	45	LYENAFLPF	9	No	2	0	3	2	2	1	0	2	2	1.00672
EpI_ORF3a_163	HLA-I	ORF3a	159	167	PYNSVTSSI	9	No	2	0	3	2	2	1	0	2	2	1.00672
EpI_ORF7a_26	HLA-I	ORF7a	39	46	TYEGNSPF	8	No	2	0	3	2	2	1	0	2	2	1.00672
EpI_S_133	HLA-I	S	167	175	TFEYVSQPF	9	No	2	0	3	2	2	1	0	2	2	1.00672
EpI_E_15	HLA-I	E	16	24	SVLLFLAFV	9	Yes	1	0	1	1	1	1	1	2	5	1.00614
EpI_NSP12_239	HLA-I	NSP12	332	341	KIFVDGVPFV	10	No	1	0	1	1	1	1	1	2	5	1.00614
EpI_NSP12_270	HLA-I	NSP12	365	373	RLSFKELLV	9	Yes	1	0	1	1	1	1	1	2	5	1.00614
EpI_NSP12_484	HLA-I	NSP12	631	639	RIMASLVLA	9	No	1	0	1	1	1	1	1	2	5	1.00614
EpI_NSP12_616	HLA-I	NSP12	784	792	SVLYYQNNV	9	No	1	0	1	1	1	1	1	2	5	1.00614
EpI_NSP12_660	HLA-I	NSP12	836	844	RILGAGCFV	9	Yes	1	0	1	1	1	1	1	2	5	1.00614
EpI_NSP13_139	HLA-I	NSP13	218	226	KLNVGDYFV	9	Yes	1	0	1	1	1	1	1	2	5	1.00614
EpI_NSP14_165	HLA-I	NSP14	235	244	YVYNPFMIDV	10	No	1	0	1	1	1	1	1	2	5	1.00614
EpI_NSP15_1	HLA-I	NSP15	1	9	SLENVAFNV	9	No	1	0	1	1	1	1	1	2	5	1.00614
EpI_NSP16_30	HLA-I	NSP16	35	44	TLPKGIMMNV	10	No	1	0	1	1	1	1	1	2	5	1.00614
EpI_NSP16_89	HLA-I	NSP16	110	118	TLIGDCATV	9	Yes	1	0	1	1	1	1	1	2	5	1.00614
EpI_NSP2_12	HLA-I	NSP2	34	42	TLSEQLDFI	9	No	1	0	1	1	1	1	1	2	5	1.00614
EpI_NSP2_310	HLA-I	NSP2	417	425	VMAYITGGV	9	No	1	0	1	1	1	1	1	2	5	1.00614
EpI_NSP2_486	HLA-I	NSP2	626	635	MMVTNNTFTL	10	No	1	0	1	1	1	1	1	2	5	1.00614
EpI_NSP3_349	HLA-I	NSP3	452	461	LVSDIDITFL	10	No	1	0	1	1	1	1	1	2	5	1.00614
EpI_NSP3_371	HLA-I	NSP3	472	481	VVQEGVLTAV	10	No	1	0	1	1	1	1	1	2	5	1.00614
EpI_NSP3_1069	HLA-I	NSP3	1303	1312	TLATHGLAAV	10	No	1	0	1	1	1	1	1	2	5	1.00614
EpI_NSP3_1256	HLA-I	NSP3	1530	1538	QLFFSYFAV	9	No	1	0	1	1	1	1	1	2	5	1.00614
EpI_NSP4_19	HLA-I	NSP4	22	30	AIFYLITPV	9	No	1	0	1	1	1	1	1	2	5	1.00614
EpI_NSP4_80	HLA-I	NSP4	101	109	FVVPGLPGT	9	No	1	0	1	1	1	1	1	2	5	1.00614
EpI_NSP4_208	HLA-I	NSP4	250	258	SLPGVFCGV	9	No	1	0	1	1	1	1	1	2	5	1.00614
EpI_NSP6_114	HLA-I	NSP6	93	101	RIMTWLDMV	9	No	1	0	1	1	1	1	1	2	5	1.00614
EpI_NSP6_167	HLA-I	NSP6	144	152	NVLTLVYKV	9	No	1	0	1	1	1	1	1	2	5	1.00614
EpI_NSP6_284	HLA-I	NSP6	270	278	KLNIKLLGV	9	No	1	0	1	1	1	1	1	2	5	1.00614
EpI_NSP8_135	HLA-I	NSP8	152	159	ALWEIQQV	8	Yes	1	0	1	1	1	1	1	2	5	1.00614
EpI_ORF3a_72	HLA-I	ORF3a	72	80	ALSKGVHFV	9	No	1	0	1	1	1	1	1	2	5	1.00614
EpI_ORF3a_119	HLA-I	ORF3a	110	118	ALVYFLQSI	9	No	1	0	1	1	1	1	1	2	5	1.00614
EpI_ORF6_23	HLA-I	ORF6	16	24	LIIMRTFKV	9	No	1	0	1	1	1	1	1	2	5	1.00614
EpI_ORF6_32	HLA-I	ORF6	25	33	SIWNLDYII	9	No	1	0	1	1	1	1	1	2	5	1.00614
EpI_ORF7a_92	HLA-I	ORF7a	102	110	LIVAAIVFI	9	No	1	0	1	1	1	1	1	2	5	1.00614
EpI_ORF8_4	HLA-I	ORF8	4	13	LVFLGIITTV	10	No	1	0	1	1	1	1	1	2	5	1.00614
EpI_S_852	HLA-I	S	1095	1104	FVSNGTHWFV	10	No	1	0	1	1	1	1	1	2	5	1.00614
EpI_NSP12_698	HLA-I	NSP12	879	887	DVFHLYLQY	9	Yes	1	0	1	3	2	1	2	1	1	1.00602
EpI_NSP15_121	HLA-I	NSP15	170	178	EAVKTQFNY	9	No	1	0	1	3	2	1	2	1	1	1.00602
EpI_NSP14_56	HLA-I	NSP14	81	89	RHVRAWIGF	9	No	2	0	3	3	2	1	0	1	3	1.00205
EpI_NSP16_142	HLA-I	NSP16	185	193	GHFAWWTAF	9	No	2	0	3	3	2	1	0	1	3	1.00205
EpI_NSP3_693	HLA-I	NSP3	816	825	YYHTTDPSFL	10	No	2	0	3	3	2	1	0	1	3	1.00205
EpI_S_15	HLA-I	S	28	37	YTNSFTRGVY	10	No	1	0	1	3	3	1	2	0	2	1.00135
EpI_E_31	HLA-I	E	31	39	LAILTALRL	9	No	0	0	2	0	3	0	3	1	5	0.995915
EpI_NSP9_66	HLA-I	NSP9	89	97	YFIKGLNNL	9	Yes	1	0	4	2	4	0	0	1	6	0.995798
EpI_NSP14_180	HLA-I	NSP14	268	276	HVASCDAIM	9	No	1	0	2	1	2	0	2	2	4	0.989963
EpI_NSP12_747	HLA-I	NSP12	923	930	AMYTPHTV	8	No	1	0	1	1	1	1	2	2	2	0.988282
EpI_ORF7a_45	HLA-I	ORF7a	63	71	FAFACPDGV	9	No	1	0	2	1	2	1	0	2	5	0.987582
EpI_NSP2_366	HLA-I	NSP2	489	498	KEIKESVQTF	10	No	1	0	1	0	2	1	3	0	4	0.986298
EpI_NSP3_82	HLA-I	NSP3	94	102	GEFKLASHM	9	No	1	0	1	0	2	1	3	0	4	0.986298
EpI_NSP3_635	HLA-I	NSP3	745	753	REVRTIKVF	9	No	1	0	1	0	2	1	3	0	4	0.986298
EpI_S_291	HLA-I	S	339	347	GEVFNATRF	9	No	1	0	1	0	2	1	3	0	4	0.986298
EpI_NSP6_1	HLA-I	NSP6	5	13	RTIKGTHHW	9	No	1	0	3	1	3	0	2	1	4	0.985294
EpI_N_133	HLA-I	N	267	274	AYNVTQAF	8	No	1	0	2	1	2	1	2	1	2	0.983613
EpI_NSP3_934	HLA-I	NSP3	1101	1110	PYPNASFDNF	10	No	1	0	2	1	2	1	2	1	2	0.983613
EpI_S_556	HLA-I	S	705	712	VAYSNNSI	8	No	1	0	3	1	4	0	1	2	3	0.98261
EpI_NSP1_35	HLA-I	NSP1	45	53	HLKDGTCGL	9	No	0	0	2	0	3	0	2	2	5	0.982026
EpI_NSP3_372	HLA-I	NSP3	472	480	VVQEGVLTA	9	No	0	0	2	0	3	0	2	2	5	0.982026
EpI_NSP8_133	HLA-I	NSP8	151	159	SALWEIQQV	9	No	0	0	2	0	3	0	2	2	5	0.982026
EpI_ORF7a_56	HLA-I	ORF7a	74	82	VYQLRARSV	9	No	3	0	3	3	3	0	0	2	2	0.979925
EpI_NSP2_121	HLA-I	NSP2	196	204	SEVGPEHSL	9	No	0	0	0	1	1	1	3	0	6	0.978361
EpI_N_129	HLA-I	N	265	274	TKAYNVTQAF	10	No	0	0	2	0	3	0	4	1	2	0.978058
EpI_NSP16_44	HLA-I	NSP16	51	59	CQYLNTLTL	9	No	1	0	3	2	4	0	1	1	4	0.977941
EpI_NSP6_104	HLA-I	NSP6	84	93	VYMPASWVMR	10	No	2	0	1	2	1	1	1	2	2	0.977661
EpI_NSP13_188	HLA-I	NSP13	266	274	VANYQKVGM	9	No	0	0	3	0	4	0	2	1	5	0.977358
EpI_NSP6_89	HLA-I	NSP6	76	85	ATVAYFNMVY	10	Yes	3	0	3	3	2	1	1	0	1	0.976261
EpI_NSP1_79	HLA-I	NSP1	89	97	VAELEGIQY	9	No	2	0	2	2	2	0	3	1	1	0.975373
EpI_NSP13_132	HLA-I	NSP13	211	219	YRGTTTYKL	9	Yes	3	0	3	4	3	0	0	1	3	0.975257
EpI_NSP15_89	HLA-I	NSP15	125	133	GRVDGQVDL	9	No	3	0	3	4	3	0	0	1	3	0.975257
EpI_NSP16_221	HLA-I	NSP16	254	262	LRGTAVMSL	9	No	3	0	3	4	3	0	0	1	3	0.975257
EpI_NSP4_157	HLA-I	NSP4	185	193	LRPDTRYVL	9	No	3	0	3	4	3	0	0	1	3	0.975257
EpI_NSP4_409	HLA-I	NSP4	430	438	LRSDVLLPL	9	No	3	0	3	4	3	0	0	1	3	0.975257
EpI_NSP4_446	HLA-I	NSP4	463	471	YREAACCHL	9	Yes	3	0	3	4	3	0	0	1	3	0.975257
EpI_ORF7a_69	HLA-I	ORF7a	88	96	IRQEEVQEL	9	No	3	0	3	4	3	0	0	1	3	0.975257
EpI_NSP13_280	HLA-I	NSP13	378	386	MATNYDLSV	9	No	1	0	3	0	3	0	2	1	5	0.97409
EpI_NSP3_886	HLA-I	NSP3	1047	1055	DVFYKENSY	9	No	0	0	0	1	2	1	4	0	2	0.971709
EpI_NSP3_55	HLA-I	NSP3	69	77	SELLTPLGI	9	No	1	0	1	1	2	1	2	0	5	0.96774
EpI_NSP4_45	HLA-I	NSP4	41	49	SEIIGYKAI	9	No	1	0	1	1	2	1	2	0	5	0.96774
EpI_ORF3a_218	HLA-I	ORF3a	241	249	EEHVQIHTI	9	No	1	0	1	1	2	1	2	0	5	0.96774
EpI_ORF7a_82	HLA-I	ORF7a	94	102	QELYSPIFL	9	No	1	0	1	1	2	1	2	0	5	0.96774
EpI_NSP3_134	HLA-I	NSP3	194	202	LEMELTPVV	9	No	1	0	0	2	1	1	2	0	6	0.96774
EpI_NSP3_674	HLA-I	NSP3	795	803	HEGKTFYVL	9	No	1	0	0	2	1	1	2	0	6	0.96774
EpI_NSP3_174	HLA-I	NSP3	238	246	VVVNAANVY	9	No	1	0	2	2	2	0	3	1	2	0.967437
EpI_NSP6_94	HLA-I	NSP6	78	85	VAYFNMVY	8	Yes	1	0	2	2	2	0	3	1	2	0.967437
EpI_S_523	HLA-I	S	666	674	IGAGICASY	9	Yes	1	0	2	2	2	0	3	1	2	0.967437
EpI_NSP13_82	HLA-I	NSP13	149	157	YGIATVREV	9	No	2	0	4	2	5	0	0	1	3	0.96732
EpI_S_867	HLA-I	S	1113	1121	QIITTDNTF	9	No	0	0	1	0	2	0	4	1	4	0.966853
EpI_N_186	HLA-I	N	338	346	KLDDKDPNF	9	No	1	0	3	1	4	0	1	1	5	0.966737
EpI_NSP13_68	HLA-I	NSP13	139	147	KATEETFKL	9	No	1	0	4	1	4	0	1	1	4	0.966737
EpI_NSP13_390	HLA-I	NSP13	520	528	AVASKILGL	9	No	1	0	3	1	4	0	1	1	5	0.966737
EpI_NSP5_16	HLA-I	NSP5	35	43	VVYCPRHVI	9	No	1	0	3	1	4	0	1	1	5	0.966737
EpI_NSP6_137	HLA-I	NSP6	116	123	YASAVVLL	8	No	1	0	3	1	4	0	1	1	5	0.966737
EpI_NSP16_226	HLA-I	NSP16	265	274	GQINDMILSL	10	No	0	0	0	1	1	1	2	1	6	0.964472
EpI_N_14	HLA-I	N	45	52	LPNNTASW	8	Yes	2	0	2	2	1	0	3	1	2	0.964169
EpI_N_15	HLA-I	N	45	53	LPNNTASWF	9	Yes	2	0	2	2	1	0	3	1	2	0.964169
EpI_NSP2_468	HLA-I	NSP2	601	609	TPVCINGLM	9	No	2	0	2	2	1	0	3	1	2	0.964169
EpI_NSP3_929	HLA-I	NSP3	1097	1107	VPNQPYPNASF	11	No	2	0	2	2	1	0	3	1	2	0.964169
EpI_NSP3_932	HLA-I	NSP3	1100	1107	QPYPNASF	8	No	2	0	2	2	1	0	3	1	2	0.964169
EpI_NSP3_1159	HLA-I	NSP3	1419	1427	SVCLGSLIY	9	No	2	0	2	2	1	0	3	1	2	0.964169
EpI_NSP6_83	HLA-I	NSP6	72	81	LPSLATVAYF	10	Yes	2	0	2	2	1	0	3	1	2	0.964169
EpI_NSP6_109	HLA-I	NSP6	86	95	MPASWVMRIM	10	Yes	2	0	2	2	1	0	3	1	2	0.964169
EpI_S_174	HLA-I	S	208	216	TPINLVRDL	9	No	2	0	2	2	1	0	3	1	2	0.964169
EpI_S_285	HLA-I	S	329	338	FPNITNLCPF	10	Yes	2	0	2	2	1	0	3	1	2	0.964169
EpI_S_437	HLA-I	S	506	515	QPYRVVVLSF	10	Yes	2	0	2	2	1	0	3	1	2	0.964169
EpI_NSP12_448	HLA-I	NSP12	586	594	TVVIGTSKF	9	Yes	0	0	2	0	4	0	3	1	3	0.9595
EpI_S_824	HLA-I	S	1055	1062	SAPHGVVF	8	No	0	0	2	0	4	0	3	1	3	0.9595
EpI_NSP3_841	HLA-I	NSP3	995	1003	QYELKHGTF	9	No	2	0	2	2	2	1	0	2	2	0.959104
EpI_S_592	HLA-I	S	755	763	QYGSFCTQL	9	No	2	0	2	2	2	1	0	2	2	0.959104
EpI_E_19	HLA-I	E	20	27	FLAFVVFL	8	Yes	1	0	1	1	1	1	1	2	4	0.95852
EpI_E_26	HLA-I	E	26	34	FLLVTLAIL	9	Yes	1	0	1	1	1	1	1	2	4	0.95852
EpI_M_59	HLA-I	M	53	62	FLWLLWPVTL	10	Yes	1	0	1	1	1	1	1	2	4	0.95852
EpI_M_61	HLA-I	M	55	63	WLLWPVTLA	9	Yes	1	0	1	1	1	1	1	2	4	0.95852
EpI_M_88	HLA-I	M	89	97	GLMWLSYFI	9	No	1	0	1	1	1	1	1	2	4	0.95852
EpI_M_99	HLA-I	M	96	104	FIASFRLFA	9	No	1	0	1	1	1	1	1	2	4	0.95852
EpI_M_111	HLA-I	M	108	116	SMWSFNPET	9	Yes	1	0	1	1	1	1	1	2	4	0.95852
EpI_NSP1_95	HLA-I	NSP1	103	111	TLGVLVPHV	9	No	1	0	1	1	1	1	1	2	4	0.95852
EpI_NSP10_12	HLA-I	NSP10	13	21	VLSFCAFAV	9	Yes	1	0	1	1	1	1	1	2	4	0.95852
EpI_NSP12_34	HLA-I	NSP12	64	71	NLIDSYFV	8	No	1	0	1	1	1	1	1	2	4	0.95852
EpI_NSP12_58	HLA-I	NSP12	88	96	NLLKDCPAV	9	No	1	0	1	1	1	1	1	2	4	0.95852
EpI_NSP12_171	HLA-I	NSP12	240	248	LLMPILTLT	9	Yes	1	0	1	1	1	1	1	2	4	0.95852
EpI_NSP12_213	HLA-I	NSP12	307	315	ILHCANFNV	9	Yes	1	0	1	1	1	1	1	2	4	0.95852
EpI_NSP12_352	HLA-I	NSP12	468	476	QLLFVVEVV	9	No	1	0	1	1	1	1	1	2	4	0.95852
EpI_NSP12_390	HLA-I	NSP12	526	535	ALFAYTKRNV	10	No	1	0	1	1	1	1	1	2	4	0.95852
EpI_NSP12_501	HLA-I	NSP12	654	662	RLANECAQV	9	No	1	0	1	1	1	1	1	2	4	0.95852
EpI_NSP12_513	HLA-I	NSP12	667	675	VMCGGSLYV	9	Yes	1	0	1	1	1	1	1	2	4	0.95852
EpI_NSP12_717	HLA-I	NSP12	898	905	HMLDMYSV	8	Yes	1	0	1	1	1	1	1	2	4	0.95852
EpI_NSP12_719	HLA-I	NSP12	898	907	HMLDMYSVML	10	Yes	1	0	1	1	1	1	1	2	4	0.95852
EpI_NSP13_12	HLA-I	NSP13	40	49	KLVLSVNPYV	10	Yes	1	0	1	1	1	1	1	2	4	0.95852
EpI_NSP13_151	HLA-I	NSP13	232	241	VMPLSAPTLV	10	No	1	0	1	1	1	1	1	2	4	0.95852
EpI_NSP13_211	HLA-I	NSP13	294	302	GLALYYPSA	9	Yes	1	0	1	1	1	1	1	2	4	0.95852
EpI_NSP13_279	HLA-I	NSP13	377	386	SMATNYDLSV	10	No	1	0	1	1	1	1	1	2	4	0.95852
EpI_NSP13_312	HLA-I	NSP13	416	425	TLEPEYFNSV	10	No	1	0	1	1	1	1	1	2	4	0.95852
EpI_NSP13_391	HLA-I	NSP13	524	533	KILGLPTQTV	10	Yes	1	0	1	1	1	1	1	2	4	0.95852
EpI_NSP14_2	HLA-I	NSP14	6	14	GLFKDCSKV	9	No	1	0	1	1	1	1	1	2	4	0.95852
EpI_NSP14_12	HLA-I	NSP14	37	45	GLCVDIPGI	9	No	1	0	1	1	1	1	1	2	4	0.95852
EpI_NSP14_32	HLA-I	NSP14	56	66	SMMGFKMNYQV	11	Yes	1	0	1	1	1	1	1	2	4	0.95852
EpI_NSP14_76	HLA-I	NSP14	116	125	NLVAVPTGYV	10	No	1	0	1	1	1	1	1	2	4	0.95852
EpI_NSP14_98	HLA-I	NSP14	152	161	LMYKGLPWNV	10	Yes	1	0	1	1	1	1	1	2	4	0.95852
EpI_NSP14_212	HLA-I	NSP14	320	328	ALLADKFPV	9	Yes	1	0	1	1	1	1	1	2	4	0.95852
EpI_NSP14_213	HLA-I	NSP14	320	329	ALLADKFPVL	10	Yes	1	0	1	1	1	1	1	2	4	0.95852
EpI_NSP14_306	HLA-I	NSP14	458	466	QVVSDIDYV	9	No	1	0	1	1	1	1	1	2	4	0.95852
EpI_NSP15_34	HLA-I	NSP15	48	57	TLPVNVAFEL	10	Yes	1	0	1	1	1	1	1	2	4	0.95852
EpI_NSP15_227	HLA-I	NSP15	297	306	LLLDDFVEII	10	Yes	1	0	1	1	1	1	1	2	4	0.95852
EpI_NSP15_252	HLA-I	NSP15	330	338	MLWCKDGHV	9	Yes	1	0	1	1	1	1	1	2	4	0.95852
EpI_NSP16_53	HLA-I	NSP16	58	67	TLAVPYNMRV	10	Yes	1	0	1	1	1	1	1	2	4	0.95852
EpI_NSP16_160	HLA-I	NSP16	205	212	FLIGCNYL	8	No	1	0	1	1	1	1	1	2	4	0.95852
EpI_NSP16_203	HLA-I	NSP16	243	252	SLFDMSKFPL	10	No	1	0	1	1	1	1	1	2	4	0.95852
EpI_NSP2_180	HLA-I	NSP2	288	297	KLNEEIAIIL	10	No	1	0	1	1	1	1	1	2	4	0.95852
EpI_NSP2_192	HLA-I	NSP2	296	304	ILASFSAST	9	Yes	1	0	1	1	1	1	1	2	4	0.95852
EpI_NSP2_236	HLA-I	NSP2	349	357	ILSPLYAFA	9	No	1	0	1	1	1	1	1	2	4	0.95852
EpI_NSP2_292	HLA-I	NSP2	399	407	RLIDAMMFT	9	No	1	0	1	1	1	1	1	2	4	0.95852
EpI_NSP2_309	HLA-I	NSP2	416	425	VVMAYITGGV	10	No	1	0	1	1	1	1	1	2	4	0.95852
EpI_NSP2_320	HLA-I	NSP2	432	440	WLTNIFGTV	9	No	1	0	1	1	1	1	1	2	4	0.95852
EpI_NSP2_387	HLA-I	NSP2	505	513	FLALCADSI	9	No	1	0	1	1	1	1	1	2	4	0.95852
EpI_NSP2_398	HLA-I	NSP2	522	530	ALNLGETFV	9	No	1	0	1	1	1	1	1	2	4	0.95852
EpI_NSP3_74	HLA-I	NSP3	88	98	YLFDESGEFKL	11	No	1	0	1	1	1	1	1	2	4	0.95852
EpI_NSP3_200	HLA-I	NSP3	272	281	YIATNGPLKV	10	No	1	0	1	1	1	1	1	2	4	0.95852
EpI_NSP3_214	HLA-I	NSP3	291	299	NLAKHCLHV	9	No	1	0	1	1	1	1	1	2	4	0.95852
EpI_NSP3_239	HLA-I	NSP3	325	333	VLLAPLLSA	9	No	1	0	1	1	1	1	1	2	4	0.95852
EpI_NSP3_244	HLA-I	NSP3	330	338	LLSAGIFGA	9	Yes	1	0	1	1	1	1	1	2	4	0.95852
EpI_NSP3_330	HLA-I	NSP3	430	439	FLTENLLLYI	10	No	1	0	1	1	1	1	1	2	4	0.95852
EpI_NSP3_363	HLA-I	NSP3	460	469	FLKKDAPYIV	10	No	1	0	1	1	1	1	1	2	4	0.95852
EpI_NSP3_464	HLA-I	NSP3	569	577	KLMPVCVET	9	No	1	0	1	1	1	1	1	2	4	0.95852
EpI_NSP3_517	HLA-I	NSP3	619	628	TLNDLNETLV	10	No	1	0	1	1	1	1	1	2	4	0.95852
EpI_NSP3_523	HLA-I	NSP3	626	635	TLVTMPLGYV	10	No	1	0	1	1	1	1	1	2	4	0.95852
EpI_NSP3_743	HLA-I	NSP3	876	884	ALQDAYYRA	9	No	1	0	1	1	1	1	1	2	4	0.95852
EpI_NSP3_760	HLA-I	NSP3	896	904	ILAYCNKTV	9	No	1	0	1	1	1	1	1	2	4	0.95852
EpI_NSP3_813	HLA-I	NSP3	978	987	YLVQQESPFV	10	No	1	0	1	1	1	1	1	2	4	0.95852
EpI_NSP3_983	HLA-I	NSP3	1167	1176	LLHKPIVWHV	10	No	1	0	1	1	1	1	1	2	4	0.95852
EpI_NSP3_1153	HLA-I	NSP3	1407	1416	KLINIIIWFL	10	No	1	0	1	1	1	1	1	2	4	0.95852
EpI_NSP3_1220	HLA-I	NSP3	1504	1512	GLVAEWFLA	9	No	1	0	1	1	1	1	1	2	4	0.95852
EpI_NSP3_1236	HLA-I	NSP3	1513	1522	YILFTRFFYV	10	No	1	0	1	1	1	1	1	2	4	0.95852
EpI_NSP3_1269	HLA-I	NSP3	1545	1553	WLMWLIINL	9	No	1	0	1	1	1	1	1	2	4	0.95852
EpI_NSP3_1270	HLA-I	NSP3	1546	1554	LMWLIINLV	9	No	1	0	1	1	1	1	1	2	4	0.95852
EpI_NSP3_1312	HLA-I	NSP3	1574	1583	YVWKSYVHVV	10	No	1	0	1	1	1	1	1	2	4	0.95852
EpI_NSP3_1430	HLA-I	NSP3	1745	1754	QLMCQPILLL	10	Yes	1	0	1	1	1	1	1	2	4	0.95852
EpI_NSP3_1434	HLA-I	NSP3	1751	1759	ILLLDQALV	9	No	1	0	1	1	1	1	1	2	4	0.95852
EpI_NSP3_1487	HLA-I	NSP3	1807	1816	SLDNVLSTFI	10	No	1	0	1	1	1	1	1	2	4	0.95852
EpI_NSP3_1492	HLA-I	NSP3	1811	1819	VLSTFISAA	9	No	1	0	1	1	1	1	1	2	4	0.95852
EpI_NSP4_13	HLA-I	NSP4	17	26	FLFVAAIFYL	10	No	1	0	1	1	1	1	1	2	4	0.95852
EpI_NSP4_95	HLA-I	NSP4	118	125	FLHFLPRV	8	No	1	0	1	1	1	1	1	2	4	0.95852
EpI_NSP4_115	HLA-I	NSP4	138	146	KLIEYTDFA	9	No	1	0	1	1	1	1	1	2	4	0.95852
EpI_NSP4_275	HLA-I	NSP4	320	328	LLFLMSFTV	9	No	1	0	1	1	1	1	1	2	4	0.95852
EpI_NSP4_278	HLA-I	NSP4	322	330	FLMSFTVLC	9	No	1	0	1	1	1	1	1	2	4	0.95852
EpI_NSP4_279	HLA-I	NSP4	322	331	FLMSFTVLCL	10	No	1	0	1	1	1	1	1	2	4	0.95852
EpI_NSP4_286	HLA-I	NSP4	333	341	PVYSFLPGV	9	No	1	0	1	1	1	1	1	2	4	0.95852
EpI_NSP4_295	HLA-I	NSP4	337	344	FLPGVYSV	8	No	1	0	1	1	1	1	1	2	4	0.95852
EpI_NSP4_313	HLA-I	NSP4	346	353	YLYLTFYL	8	No	1	0	1	1	1	1	1	2	4	0.95852
EpI_NSP4_314	HLA-I	NSP4	346	354	YLYLTFYLT	9	No	1	0	1	1	1	1	1	2	4	0.95852
EpI_NSP4_321	HLA-I	NSP4	352	361	YLTNDVSFLA	10	No	1	0	1	1	1	1	1	2	4	0.95852
[truncated: 6,439 more rows]

## Sheet: HLA-II
Table S7: Predicted epitopes in SARS-Cov2 proteins using the South American alleles with WAF ≥ 0.05.
[truncated: 4,131 more rows]
